# Supplementary material for: Biallelic Variants in PYROXD2 Cause a Severe Infantile Metabolic Disorder Affecting Mitochondrial Function
Source: MDPI journal article supplement (doi:10.3390/ijms23020986), 2022-01-17
Supplement: s1 [file s1]

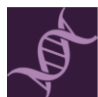

## Appendix A: Supplemental material

*Article: Biallelic variants in PYROXD2 cause a severe infantile metabolic disorder affecting mitochondrial function*

**Supplemental Table 1. Respiratory chain enzyme activities in skeletal muscle biopsy of PYROXD2 patient.**

|                                                                                | Activity |             | Ref. Range  | % Activ-<br>ity | % CS<br>Ratio | % CII<br>Ratio |
|--------------------------------------------------------------------------------|----------|-------------|-------------|-----------------|---------------|----------------|
| <b>Complex I</b><br>(NADH-coenzyme<br>Q <sub>1</sub> oxidoreductase)           | 134      | nmol/min/mg | (19 - 72)   | 327             | 121           | 132            |
| <b>Complex II</b><br>(Succinate-coenzyme<br>Q <sub>1</sub> oxidoreductase)     | 112      | nmol/min/mg | (26 - 63)   | 248             | 91            |                |
| <b>Complex II+III</b><br>(Succinate<br>cytochrome c reductase)                 | 72       | nmol/min/mg | (30 - 76)   | 157             | 59            | 64             |
| <b>Complex III</b><br>(Decylbenzylquinol-<br>cytochrome c oxidoreduc-<br>tase) | 80.3     | /min/mg     | (13 - 51)   | 277             | 97            | 108            |
| <b>Complex IV</b><br>(Cytochrome c oxidase)                                    | 10.84    | /min/mg     | (3.3 - 9.1) | 164             | 61            | 67             |
| <b>Citrate Synthase</b>                                                        | 349      | nmol/min/mg | (85 - 179)  | 271             |               |                |

*Note: All measurements are performed in duplicate and were only accepted when each of the duplicate values was within a 10% range of their average. Enzyme activities are shown as absolute values and as % residual activity relative to protein (% Activity), Citrate Synthase (% CS Ratio), and Complex II (% CII Ratio). % values ≤ 30 are shown in bold and represent major or minor criteria in the Bernier Diagnostic Scheme [1].*

**Supplemental Table 2. Respiratory chain enzyme activities in skin fibroblasts of PYROXD2 patient.**

|                                                                              | Activity |             | Ref. Range    | % Activity | % CS Ratio | % CII Ratio |
|------------------------------------------------------------------------------|----------|-------------|---------------|------------|------------|-------------|
| <b>Complex I</b><br>(NADH-coenzyme Q <sup>1</sup> oxidoreductase)            | 176      | nmol/min/mg | (93 – 131)    | 150        | 85         | 90          |
| <b>Complex II</b><br>(Succinate-coenzyme Q <sub>1</sub> oxidoreductase)      | 162      | nmol/min/mg | (87 – 120)    | 164        | 95         |             |
| <b>Complex II+III</b><br>(Succinate cytochrome <i>c</i> reductase)           | 169      | nmol/min/mg | (70 - 79)     | 223        | 128        | 133         |
| <b>Complex III</b><br>(Decylbenzylquinol-cytochrome <i>c</i> oxidoreductase) | 39.2     | /min/mg     | (21.2 - 26.2) | 161        | 94         | 97          |
| <b>Complex IV</b><br>(Cytochrome <i>c</i> oxidase)                           | 7.53     | /min/mg     | (5.28 - 5.82) | 136        | 78         | 81          |
| <b>Citrate Synthase</b>                                                      | 471      | nmol/min/mg | (215 - 319)   | 169        |            |             |

*Note: All measurements are performed in duplicate and were only accepted when each of the duplicate values was within a 10% range of their average. Enzyme activities are shown as absolute values and as % residual activity relative to protein (% Activity), Citrate Synthase (% CS Ratio), and Complex II (% CII Ratio). % values ≤ 30 are shown in bold and represent major or minor criteria in the Bernier Diagnostic Scheme [1].*

**Supplemental Table 3. Proteomics data on PYROXD2 patient, including data used to generate Volcano plots and profile plots of log2-transformed intensities for cellular proteins in patient and control fibroblasts.**

(SEE EXCEL SPREADSHEET)

**Supplemental Table 4.** GO terms enriched in proteins of lower level in patient fibroblasts compared to controls.

| Reactome pathways                                                   | Homo sapiens - REFLIST (20595) | Uploaded (272) | Uploaded (expected) | Uploaded (over /under) | Uploaded fold Enrichment) | Uploaded (raw P-value) | uploaded (FDR) |
|---------------------------------------------------------------------|--------------------------------|----------------|---------------------|------------------------|---------------------------|------------------------|----------------|
| Mitochondrial translation elongation (R-HSA-5389840)                | 88                             | 16             | 1.16                | +                      | 13.77                     | 4.25E-13               | 9.71E-10       |
| Mitochondrial translation termination (R-HSA-5419276)               | 88                             | 16             | 1.16                | +                      | 13.77                     | 4.25E-13               | 4.85E-10       |
| Mitochondrial translation initiation (R-HSA-5368286)                | 88                             | 16             | 1.16                | +                      | 13.77                     | 4.25E-13               | 3.24E-10       |
| Mitochondrial translation (R-HSA-5368287)                           | 94                             | 16             | 1.24                | +                      | 12.89                     | 1.04E-12               | 4.76E-10       |
| Complex I biogenesis (R-HSA-6799198)                                | 55                             | 8              | 0.73                | +                      | 11.01                     | 1.57E-06               | 5.96E-04       |
| Striated Muscle Contraction (R-HSA-390522)                          | 36                             | 5              | 0.48                | +                      | 10.52                     | 1.85E-04               | 3.84E-02       |
| Smooth Muscle Contraction (R-HSA-445355)                            | 39                             | 5              | 0.52                | +                      | 9.71                      | 2.60E-04               | 4.95E-02       |
| Cargo recognition for clathrin-mediated endocytosis (R-HSA-8856825) | 104                            | 9              | 1.37                | +                      | 6.55                      | 1.74E-05               | 4.98E-03       |
| Translation (R-HSA-72766)                                           | 293                            | 25             | 3.87                | +                      | 6.46                      | 7.50E-13               | 4.28E-10       |
| Respiratory electron transport (R-HSA-611105)                       | 100                            | 8              | 1.32                | +                      | 6.06                      | 8.59E-05               | 2.18E-02       |
| Clathrin-mediated endocytosis (R-HSA-8856828)                       | 144                            | 9              | 1.9                 | +                      | 4.73                      | 1.85E-04               | 4.23E-02       |
| Metabolism of proteins (R-HSA-392499)                               | 1977                           | 51             | 26.11               | +                      | 1.95                      | 4.23E-06               | 1.38E-03       |

**Supplemental Table 5. GO terms enriched in proteins of higher level in patient fibroblasts compared to controls.**

| Reactome pathways                                                       | Homo sapiens - REFLIST (20595) | Uploaded (272) | Uploaded (expected) | Uploaded (over /under) | Uploaded fold Enrichment) | Uploaded (raw P-value) | uploaded (FDR) |
|-------------------------------------------------------------------------|--------------------------------|----------------|---------------------|------------------------|---------------------------|------------------------|----------------|
| Cholesterol biosynthesis via lathosterol (R-HSA-6807062)                | 4                              | 2              | 0.02                | +                      | > 100                     | 2.96E-04               | 4.84E-02       |
| Cholesterol biosynthesis via desmosterol (R-HSA-6807047)                | 4                              | 2              | 0.02                | +                      | > 100                     | 2.96E-04               | 4.51E-02       |
| Cholesterol biosynthesis (R-HSA-191273)                                 | 24                             | 8              | 0.11                | +                      | 73.82                     | 1.18E-12               | 2.70E-09       |
| Other semaphorin interactions (R-HSA-416700)                            | 19                             | 3              | 0.09                | +                      | 34.97                     | 1.27E-04               | 2.24E-02       |
| Activation of Matrix Metalloproteinases (R-HSA-1592389)                 | 33                             | 5              | 0.15                | +                      | 33.55                     | 7.35E-07               | 1.68E-04       |
| Activation of gene expression by SREBF (SREBP) (R-HSA-2426168)          | 40                             | 6              | 0.18                | +                      | 33.22                     | 5.68E-08               | 3.24E-05       |
| Regulation of cholesterol biosynthesis by SREBP (SREBF) (R-HSA-1655829) | 53                             | 6              | 0.24                | +                      | 25.07                     | 2.61E-07               | 9.92E-05       |
| Collagen degradation (R-HSA-1442490)                                    | 64                             | 6              | 0.29                | +                      | 20.76                     | 7.29E-07               | 1.85E-04       |
| Metabolism of steroids (R-HSA-8957322)                                  | 148                            | 10             | 0.67                | +                      | 14.96                     | 2.38E-09               | 2.72E-06       |
| Integrin cell surface interactions (R-HSA-216083)                       | 84                             | 5              | 0.38                | +                      | 13.18                     | 5.08E-05               | 9.66E-03       |
| Degradation of the extracellular matrix (R-HSA-1474228)                 | 140                            | 8              | 0.63                | +                      | 12.65                     | 3.46E-07               | 9.87E-05       |
| Extracellular matrix organization (R-HSA-1474244)                       | 299                            | 11             | 1.35                | +                      | 8.15                      | 1.47E-07               | 6.70E-05       |
| Metabolism of lipids (R-HSA-556833)                                     | 733                            | 18             | 3.31                | +                      | 5.44                      | 5.55E-09               | 4.23E-06       |
| Metabolism (R-HSA-1430728)                                              | 2079                           | 27             | 9.39                | +                      | 2.88                      | 3.31E-07               | 1.08E-04       |
| Unclassified (UNCLASSIFIED)                                             | 9941                           | 23             | 44.89               | -                      | 0.51                      | 5.29E-06               | 1.10E-03       |

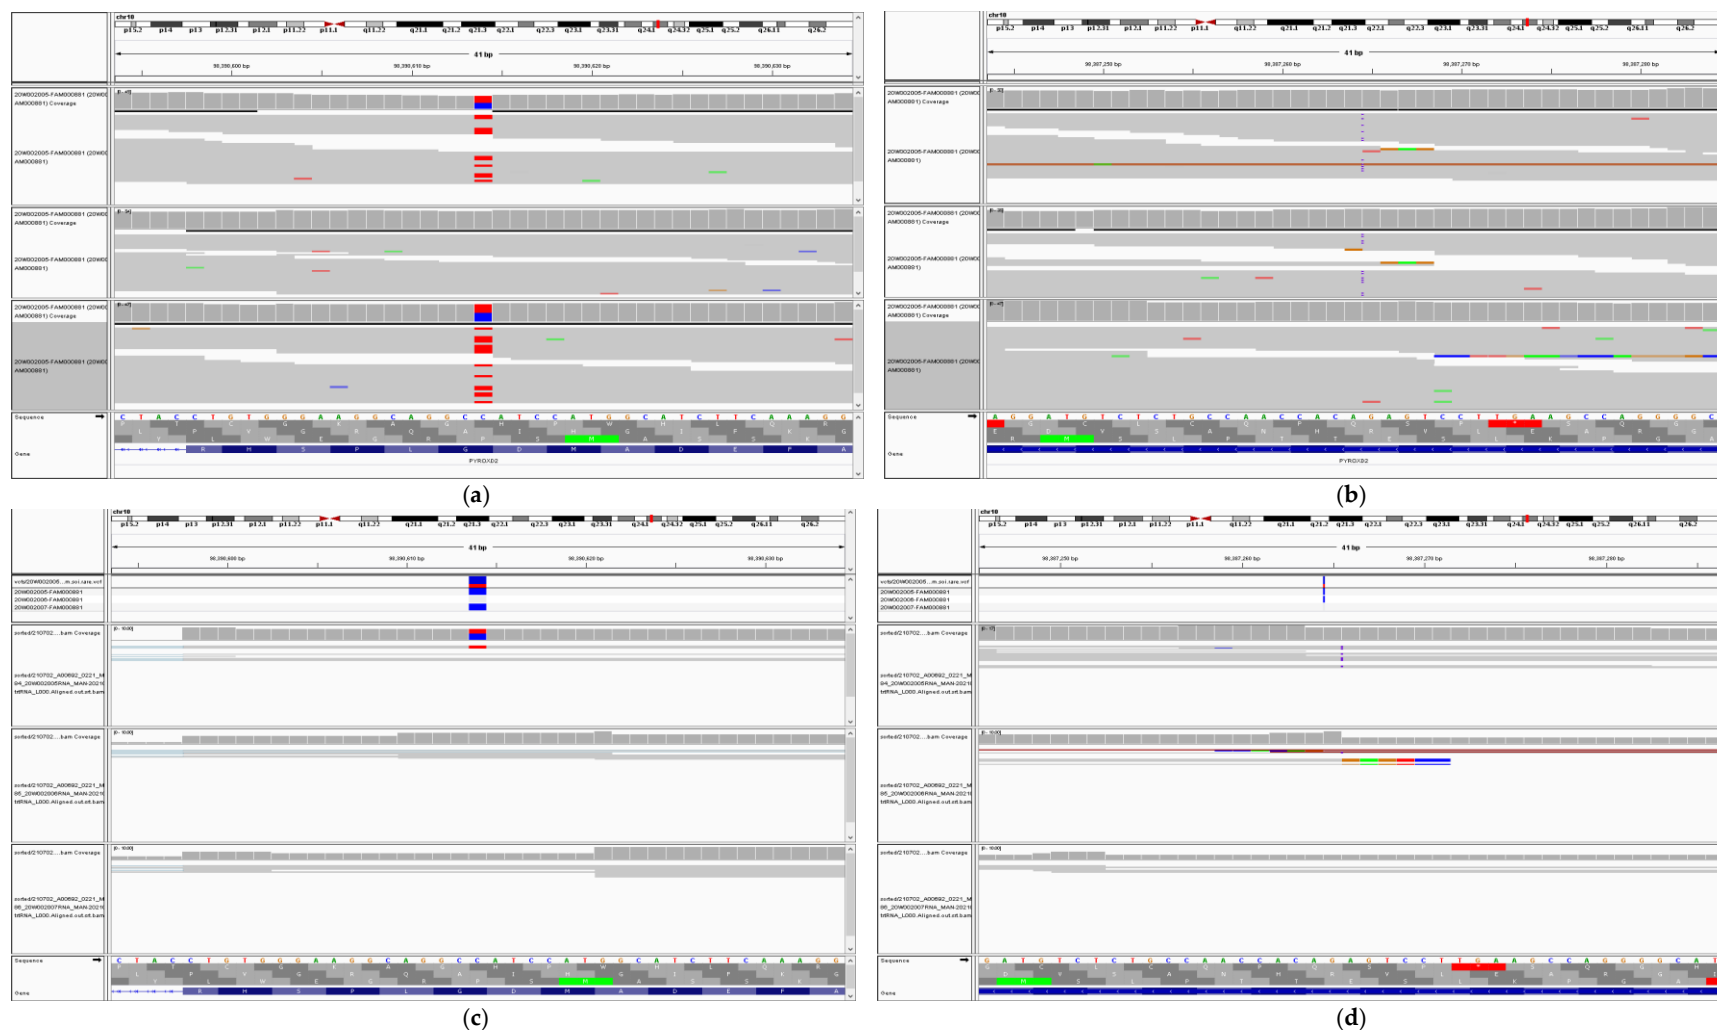

**Supplemental Figure 1. GS and RNASeq analysis of *PYROXD2* in patient fibroblasts.** (A) The paternally inherited *PYROXD2* missense variant (NM\_32709.2: c.1276G>A; p.(Gly426Ser); and (B) the maternally inherited frameshift variant (NM\_32709.2: c.1490dupC, p.(Val498Cysfs\*79) from GS data. (C) RNASeq analysis confirmed the missense variant was expressed in the proband in approximately 50% of the observed reads; and (D) the frameshift variant was observed in the RNASeq data in both the proband and the mother in approximately 50% of the reads.

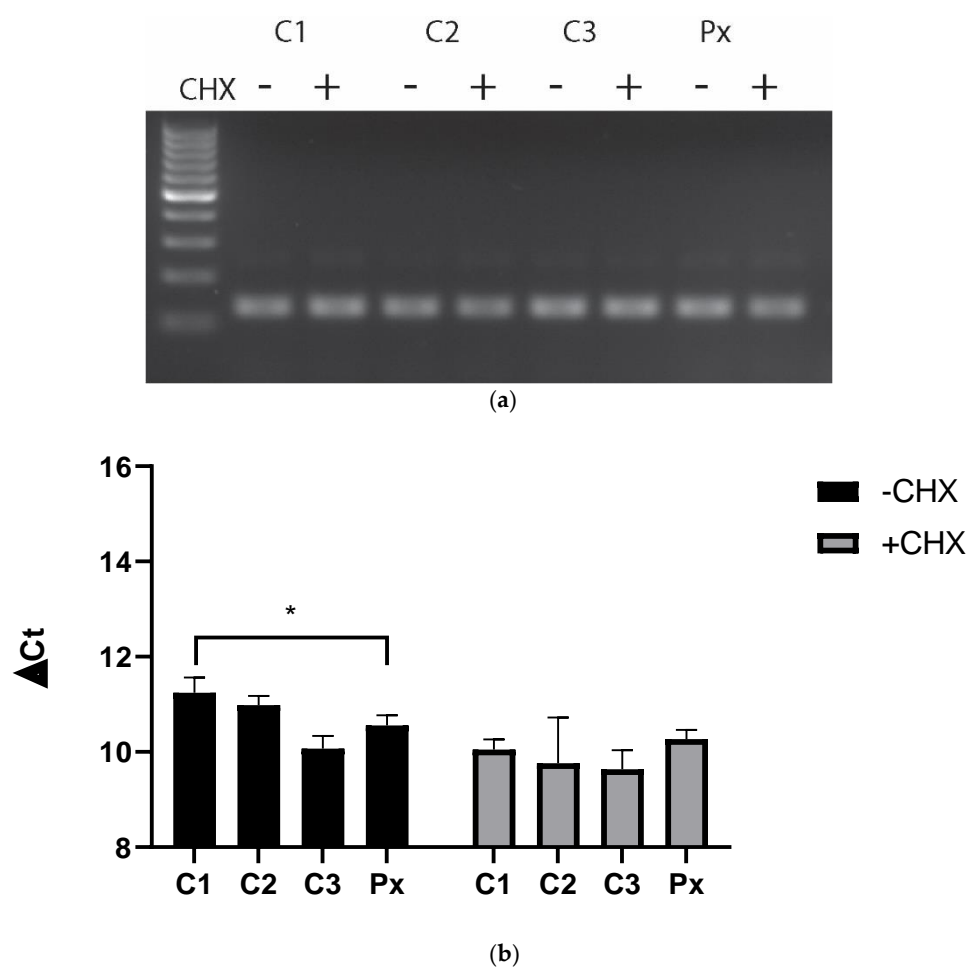

**Supplemental Figure 2. RT-PCR and qPCR of PYROXD2 in patient fibroblasts.** (A) RT-PCR analysis shows similar levels of PYROXD2 transcript in patient and controls, with (+) or without (-) cycloheximide. (B) qPCR of PYROXD2 show no difference in PYROXD2 levels between two of the three controls (C1 - C3) and patient (Px) fibroblasts. \*  $p \leq 0.05$ .

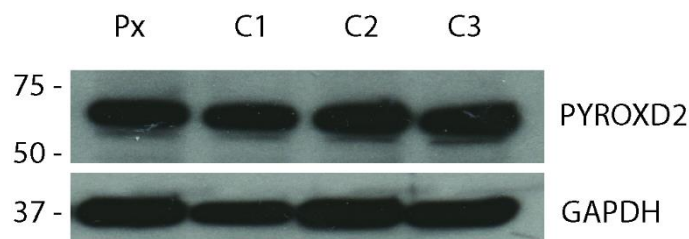

**Supplemental Figure 3. Western blot of PYROXD2 in patient fibroblasts.** Western blot of PYROXD2 in patient fibroblasts (Px) and three controls (C1 - C3) showing normal levels of PYROXD2 protein.

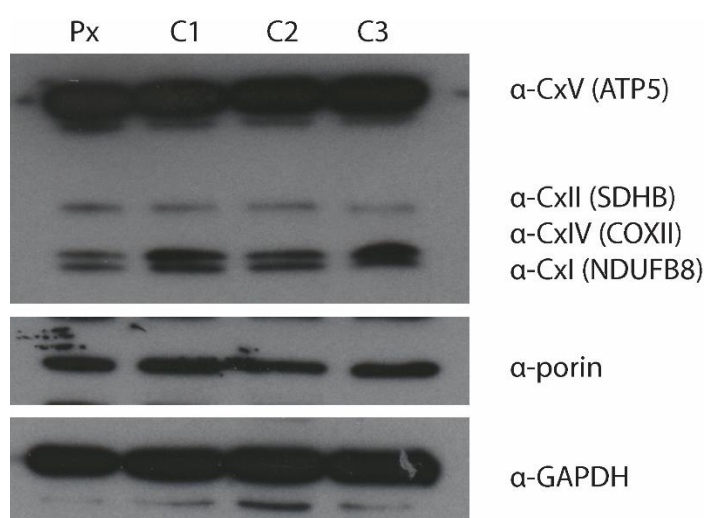

**Supplemental Figure 4: Western blot of OXPHOS complex subunits in patient fibroblasts.** Western blot of a representative subunit of each OXPHOS complex including; cytochrome c oxidase subunit 2 [COX2], cytochrome b-c1 complex subunit 2 [UQCRC2], succinate dehydrogenase [ubiquinone] flavoprotein subunit B [SDHB], NADH dehydrogenase [ubiquinone] 1 beta subcomplex subunit 8 [NDUFB8] and ATP synthase subunit alpha [ATP5A] in patient fibroblasts (Px) and three controls (C1 - C3) showing normal levels of OXPHOS subunit proteins.

## References

1. Bernier, F.P.; Boneh, A.; Dennett, X.; Chow, C.W.; Cleary, M.A.; Thorburn, D.R. Diagnostic criteria for respiratory chain disorders in adults and children. *Neurology* **2002**, *59*, 1406-1411, doi:10.1212/01.wnl.0000033795.17156.00.
