# Supplementary material for: Biallelic Variants in PYROXD2 Cause a Severe Infantile Metabolic Disorder Affecting Mitochondrial Function
Source: Int J Mol Sci. 2022 Jan 17;23(2):986. doi: 10.3390/ijms23020986 (PMC8777681; doi:10.3390/ijms23020986)
Supplement: Supplementary file 1 [file ijms-23-00986-s001.zip › SuppTable3_PYROXD2_proteomics.xlsx]

## Sheet: PYROXD2_matrix
Genes	ProteinDescriptions	UniProtIds	ProteinGroups	MitoCarta3.0 List	MitoCarta3.0 MitoPathways	T-test Significant	-log10 T-test p-value	Difference Log2 PYCRL_controls	T-test Test statistic	MS2 Quantity Control_1	MS2 Quantity Control_2	MS2 Quantity Control_3	MS2 Quantity Control_4	MS2 Quantity Control_5	MS2 Quantity PYROXD2_1	MS2 Quantity PYROXD2_2	MS2 Quantity PYROXD2_3	Protein Pvalue	Protein Qvalue	Molecular Weight	Peptides_Used_Quantification_Control_1	Peptides_Used_Quantification_Control_2	Peptides_Used_Quantification_Control_3	Peptides_Used_Quantification_Control_4	Peptides_Used_Quantification_Control_5	Peptides_Used_QuantificationPYCRL_1	Peptides_Used_QuantificationPYCRL_2	Peptides_Used_QuantificationPYCRL_3
COL2A1	Collagen alpha-1(II) chain	P02458	P02458	-		+	4.78886	-4.86597	-12.4689	20.127	20.5337	21.6454	21.1027	20.1549	15.9044	15.8287	15.8072	9.53e-05	9.24e-05	141785	3	3	4	3	4	3	3	3
TGM2	Protein-glutamine gamma-glutamyltransferase 2	P21980	P21980	-		+	3.22579	-4.12805	-6.57305	16.5473	17.4313	18.8636	19.102	18.1691	13.799	13.9845	13.9003	1.84e-05	3.67e-05	77328.8	17	20	26	26	26	5	5	4
PAXBP1	PAX3- and PAX7-binding protein 1	Q9Y5B6	Q9Y5B6	-		+	1.83696	-4.04142	-3.39665	18.0807	17.8652	18.1998	13.571	17.947	13.0999	13.0449	13.129	0.00183944	0.000998907	104804	2	2	1	2	1	1	3	2
HMGN2	Non-histone chromosomal protein HMG-17	P05204	P05204	-		+	2.74852	-3.59653	-6.04576	17.0523	17.119	17.2543	15.4563	17.4022	13.2159	NaN	13.3047	0.000685829	0.000443326	9392.67	2	1	3	1	3	1	NaN	1
NDUFB1	NADH dehydrogenase [ubiquinone] 1 beta subcomplex subunit 1	O75438	O75438	+	CI subunits;Complex I;OXPHOS;OXPHOS subunits	+	1.65539	-3.05733	-3.63249	NaN	19.7937	19.5427	17.1692	NaN	15.7105	15.9679	15.6553	0.00325	0.00143	6961.2	NaN	1	1	1	NaN	2	1	1
CRIP2	Cysteine-rich protein 2	P52943	P52943	-		+	2.99647	-2.98947	-5.94959	18.4387	17.898	18.6546	16.5996	17.5994	15.0999	14.9717	14.4742	2.85e-06	3.26e-05	22492.7	6	5	5	3	4	2	2	2
SNRPC	U1 small nuclear ribonucleoprotein C	P09234	P09234	-		+	6.20644	-2.95962	-21.7215	17.7946	17.7493	17.5556	17.2656	17.6145	14.4957	14.757	14.6562	0.000100117	9.56e-05	17393.7	2	2	2	2	2	2	2	2
CDV3	Protein CDV3 homolog	Q9UKY7	Q9UKY7	-		+	2.6035	-2.95687	-4.98401	16.8996	16.7183	16.6695	15.6039	16.7645	14.3999	12.2041	14.1189	1.22e-05	3.37e-05	27334.8	11	9	9	7	10	1	2	1
WDR46	WD repeat-containing protein 46	O15213	O15213	-		+	2.75086	-2.89473	-6.05305	18.1656	19.5351	18.4182	18.1302	17.9416	NaN	15.4589	15.6279	0.0156	0.00639	68071.1	3	1	1	2	2	1	3	2
ADO	2-aminoethanethiol dioxygenase	Q96SZ5	Q96SZ5	-		+	5.14935	-2.81756	-14.3771	17.1655	16.9964	17.247	17.1166	17.7121	14.3041	14.7226	14.2632	0.00187515	0.00101361	29750.8	1	4	3	3	4	2	4	4
GOLPH3L	Golgi phosphoprotein 3-like	Q9H4A5	Q9H4A5	-		+	2.79736	-2.77769	-5.44521	18.6125	18.7495	18.6682	18.3556	18.934	17.2249	15.3922	15.0417	0.00067	0.000436	32767.4	3	2	2	2	2	2	2	2
DES	Desmin	P17661	P17661	-			1.29544	-2.74552	-2.55999	NaN	17.847	18.9789	21.6862	17.8436	16.4123	16.3233	16.2946	0.000307509	0.000230337	53535.8	NaN	2	3	1	12	7	9	8
AKR1C1	Aldo-keto reductase family 1 member C1	Q04828	Q04828	-		+	4.01756	-2.72592	-9.14764	18.4031	18.545	18.8305	17.5161	18.4954	15.5734	15.6076	15.7154	2.82e-05	4.43e-05	36788.3	13	14	13	10	13	5	5	5
TPM3	Isoform 2 of Tropomyosin alpha-3 chain	P06753-2	P06753-2	-		+	6.20593	-2.67238	-21.7172	18.9939	18.9001	18.6969	18.6926	19.0144	16.1623	16.3886	16.0106	1e-06	3.26e-05	29032.7	20	17	19	18	19	12	15	14
RPS27	40S ribosomal protein S27	P42677	P42677	-		+	5.20185	-2.64896	-14.677	18.4754	18.2111	18.1286	18.1079	18.5335	15.817	15.8393	15.2707	8.61e-06	3.33e-05	9461.12	3	3	3	3	3	1	2	2
ZC2HC1A	Zinc finger C2HC domain-containing protein 1A	Q96GY0	Q96GY0	-		+	5.55703	-2.63005	-16.869	17.1643	16.6765	16.8751	16.8636	16.6014	13.9921	14.2291	14.3973	0.00237975	0.00120221	35092.1	6	4	3	2	3	2	1	1
TMEM231	Transmembrane protein 231	Q9H6L2	Q9H6L2	-		+	1.68089	-2.60698	-3.6992	NaN	NaN	18.114	17.3737	15.8855	14.0629	14.9612	14.5281	0.0126	0.00524	36058.8	NaN	NaN	2	3	1	2	3	3
MRPL49	39S ribosomal protein L49, mitochondrial	Q13405	Q13405	+	LSU;Mitochondrial central dogma;Mitochondrial ribosome;Translation	+	5.70953	-2.59961	-17.9039	16.8457	16.8496	16.8118	16.565	16.936	13.9453	14.1573	14.5034	0.000389882	0.000280284	19198	4	4	4	3	4	2	1	1
TPM1	Isoform 5 of Tropomyosin alpha-1 chain	P09493-5	P09493-5	-		+	3.12646	-2.57285	-7.3166	17.3573	17.2057	17.7087	16.6475	16.8519	14.2782	14.8845	NaN	4.04e-05	5.23e-05	28385.5	2	2	2	2	2	1	2	NaN
CISD1	CDGSH iron-sulfur domain-containing protein 1	Q9NZ45	Q9NZ45	+	Fe-S cluster biosynthesis;Fe-S-containing proteins;Metabolism;Metals and cofactors	+	3.0386	-2.56571	-6.06056	15.9585	14.271	15.0709	15.3412	15.8308	13.0436	12.7115	12.4312	9.32e-05	9.09e-05	12199	4	2	4	4	3	2	2	1
TGOLN2	Trans-Golgi network integral membrane protein 2;Isoform TGN48 of Trans-Golgi network integral membrane protein 2;Isoform 5 of Trans-Golgi network integral membrane protein 2;Isoform 7 of Trans-Golgi network integral membrane protein 2	O43493;O43493-3;O43493-5;O43493-7	O43493;O43493-3;O43493-5;O43493-7	-		+	2.76807	-2.42938	-5.3737	16.524	16.3199	16.3793	16.3768	16.2706	14.0592	14.9466	12.8284	4.15e-05	5.33e-05	45879.57;45879.57-3;45879.57-5;45879.57-7	8	5	6	5	6	1	2	2
EMD	Emerin	P50402	P50402	-		+	4.51597	-2.39774	-11.1851	18.353	18.3557	18.4502	17.8751	18.3378	16.1805	16.0174	15.432	4.38e-05	5.5e-05	28993.8	9	9	9	10	9	4	5	6
BAG3	BAG family molecular chaperone regulator 3	O95817	O95817	-		+	4.31402	-2.36038	-10.3147	17.9854	17.7321	17.6019	17.0247	17.6477	15.4282	15.2763	15.0095	1.66e-05	3.56e-05	61594.7	20	15	20	15	20	6	5	5
C1orf198	Uncharacterized protein C1orf198	Q9H425	Q9H425	-		+	1.87713	-2.35955	-3.75175	16.4189	16.5485	18.3771	16.6024	17.4992	14.8294	NaN	14.63	7.24e-05	7.59e-05	36346.5	5	10	14	2	10	1	NaN	1
ANXA1	Annexin A1	P04083	P04083	-		+	6.80708	-2.33636	-27.4086	20.8395	20.8989	20.5621	20.8213	20.889	18.4257	18.5247	18.4469	1.74e-06	3.26e-05	38714.2	25	25	26	25	27	25	24	24
CAST	Calpastatin;Isoform 6 of Calpastatin;Isoform 7 of Calpastatin	P20810;P20810-6;P20810-7	P20810;P20810-6;P20810-7	-		+	4.59676	-2.30759	-11.5518	18.3074	17.85	17.8558	17.5143	17.8615	15.4722	15.8603	15.378	5.86e-05	6.57e-05	76572.83;76572.83-6;76572.83-7	28	25	25	21	26	6	7	9
NDUFAF4	NADH dehydrogenase [ubiquinone] 1 alpha subcomplex assembly factor 4	Q9P032	Q9P032	+	CI assembly factors;Complex I;OXPHOS;OXPHOS assembly factors	+	7.80158	-2.21407	-40.2201	15.5789	15.5442	15.667	15.4158	15.5752	13.333	13.3249	13.3687	0.000319	0.000237	20266.5	3	4	3	3	3	1	1	2
CLTA	Clathrin light chain A;Isoform Non-brain of Clathrin light chain A;Isoform 3 of Clathrin light chain A;Isoform 4 of Clathrin light chain A	P09496;P09496-2;P09496-3;P09496-4	P09496;P09496-2;P09496-3;P09496-4	-		+	3.52714	-2.20852	-7.46981	18.2672	18.4049	18.0057	17.996	17.1928	15.6664	16.0208	15.6072	2.37e-06	3.26e-05	27076.69;27076.69-2;27076.69-3;27076.69-4	7	7	7	6	7	5	5	5
BASP1	Brain acid soluble protein 1	P80723	P80723	-		+	2.83909	-2.19835	-5.54822	18.2023	17.5273	17.4005	16.454	16.9736	15.2068	15.2331	14.8997	3.53e-05	4.91e-05	22693.4	13	12	12	11	11	4	6	6
SERPINB2	Plasminogen activator inhibitor 2	P05120	P05120	-		+	1.49706	-2.15811	-2.95129	18.3567	16.5448	16.757	18.3731	18.5087	15.3803	NaN	15.7196	3.18e-05	4.7e-05	46596.2	15	6	5	16	15	3	NaN	4
KCTD12	BTB/POZ domain-containing protein KCTD12	Q96CX2	Q96CX2	-		+	2.59899	-2.15667	-4.97361	20.0237	18.1556	18.5234	18.5016	18.6884	16.4904	16.7093	16.6659	9.1e-06	3.33e-05	35700.8	12	11	12	11	11	8	10	9
SEC61B	Protein transport protein Sec61 subunit beta	P60468	P60468	-		+	9.96042	-2.14113	-92.2188	20.8738	20.8292	20.8487	20.8399	20.7804	18.6648	18.6997	18.7153	1.57e-05	3.52e-05	9974.45	3	3	3	3	3	3	3	3
EPS8L2	Epidermal growth factor receptor kinase substrate 8-like protein 2;Isoform 3 of Epidermal growth factor receptor kinase substrate 8-like protein 2	Q9H6S3;Q9H6S3-3	Q9H6S3;Q9H6S3-3	-		+	3.96712	-2.13371	-8.96123	17.6391	17.1922	17.2666	16.7279	17.0695	14.8894	15.4116	14.8349	1.86e-05	3.67e-05	80620.61;80620.61-3	9	8	7	7	8	2	3	2
ACTBL2	Beta-actin-like protein 2	Q562R1	Q562R1	-			1.05432	-2.1146	-2.03344	22.7969	22.9915	23.1483	19.8844	19.9057	19.2052	19.3854	20.3017	0.0092	0.00387	42003.2	2	2	2	2	1	2	2	2
STING1	Stimulator of interferon genes protein	Q86WV6	Q86WV6	-		+	4.75231	-2.066	-12.2894	18.019	17.3108	17.729	17.4086	17.5505	15.5813	15.5046	15.5269	4.53e-05	5.6e-05	42192.6	7	7	7	7	7	2	3	3
TPM2	Isoform 2 of Tropomyosin beta chain	P07951-2	P07951-2	-		+	4.08969	-2.06088	-9.42013	17.9406	17.8492	18.2184	18.0598	18.5642	16.3559	16.1395	15.7012	3.2e-05	4.72e-05	32989.8	12	13	13	14	15	8	10	9
RAVER1	Isoform 2 of Ribonucleoprotein PTB-binding 1	Q8IY67-2	Q8IY67-2	-		+	2.14726	-2.02434	-3.99935	16.7917	17.0833	17.1137	16.8088	17.2196	14.0759	16.2998	14.5616	0.00266332	0.00128684	77859.6	4	2	4	4	6	2	4	2
CLNS1A	Methylosome subunit pICln	P54105	P54105	-		+	1.69695	-1.99934	-3.139	18.787	17.7681	17.3923	15.9162	17.5935	15.1087	15.892	15.4755	0.000151	0.000129	26215.3	2	1	1	1	2	2	1	1
IGFBP3	Insulin-like growth factor-binding protein 3;Isoform 2 of Insulin-like growth factor-binding protein 3	P17936;P17936-2	P17936;P17936-2	-		+	1.59444	-1.97838	-2.95515	16.2421	16.347	17.1832	18.9092	17.9343	15.4101	15.2599	15.3643	1.46e-05	3.47e-05	31674.2;31674.2-2	5	5	8	11	11	4	3	6
POSTN	Isoform 2 of Periostin;Isoform 4 of Periostin	Q15063-2;Q15063-4	Q15063-2;Q15063-4	-			1.29387	-1.9772	-2.76034	18.5153	NaN	16.0736	17.0308	NaN	15.0795	15.3975	15.211	5.52e-06	3.26e-05	83849.99;87020.55	14	NaN	7	7	NaN	2	1	1
ARFIP1	Isoform A of Arfaptin-1	P53367-2	P53367-2	-		+	4.31254	-1.97439	-10.3085	17.0961	17.0735	17.1279	16.9808	16.992	14.5681	15.3758	15.2952	6.49e-05	7.03e-05	38598.7	13	11	10	10	10	2	3	3
NKRF	NF-kappa-B-repressing factor;Isoform 2 of NF-kappa-B-repressing factor	O15226;O15226-2	O15226;O15226-2	-		+	2.61602	-1.95854	-5.64514	16.8629	17.9212	17.0507	17.2423	16.8021	NaN	15.3698	15.0648	0.00979	0.00411	77672.88;77672.88-2	2	1	2	3	1	2	2	2
SNAP29	Synaptosomal-associated protein 29	O95721	O95721	+	Autophagy;Mitochondrial dynamics and surveillance	+	2.07267	-1.95129	-4.20373	17.6652	16.4525	17.4722	16.4121	17.5112	NaN	15.2504	15.0523	0.000145	0.000125	28970.3	8	8	7	4	8	NaN	2	1
BLOC1S3	Biogenesis of lysosome-related organelles complex 1 subunit 3	Q6QNY0	Q6QNY0	-		+	4.69446	-1.9118	-15.514	16.4365	16.3843	16.7786	16.437	16.4637	NaN	14.652	14.5245	0.000134639	0.000118043	21255.6	6	5	5	4	4	NaN	1	1
NDUFS3	NADH dehydrogenase [ubiquinone] iron-sulfur protein 3, mitochondrial	O75489	O75489	+	CI subunits;Complex I;OXPHOS;OXPHOS subunits	+	6.6171	-1.8949	-25.4674	18.0899	18.1441	18.2661	18.1614	17.9648	16.2164	16.3195	16.1552	3.29e-05	4.75e-05	30241.5	11	11	10	11	10	6	5	5
NDUFS6	NADH dehydrogenase [ubiquinone] iron-sulfur protein 6, mitochondrial	O75380	O75380	+	CI subunits;Complex I;OXPHOS;OXPHOS subunits	+	1.92952	-1.88647	-3.86985	16.31	14.8925	16.4483	16.248	16.1674	13.9205	NaN	14.333	0.000608	0.000402	13711.6	3	3	4	5	4	2	NaN	1
NDUFS8	NADH dehydrogenase [ubiquinone] iron-sulfur protein 8, mitochondrial	O00217	O00217	+	CI subunits;Complex I;Fe-S-containing proteins;Metabolism;Metals and cofactors;OXPHOS;OXPHOS subunits	+	5.87759	-1.8826	-19.1156	18.9816	19.1252	19.1236	18.8473	19.1174	17.3285	17.0261	17.1148	0.000878	0.00054	23705.1	3	3	3	3	2	2	2	4
CLTB	Isoform Non-brain of Clathrin light chain B	P09497-2	P09497-2	-		+	2.5044	-1.87739	-4.75876	17.4031	17.6832	17.1397	17.3413	15.9814	15.1908	15.3072	15.1991	3.65e-05	4.99e-05	23181.2	7	7	7	8	6	3	4	4
TXNIP	Thioredoxin-interacting protein;Isoform 2 of Thioredoxin-interacting protein	Q9H3M7;Q9H3M7-2	Q9H3M7;Q9H3M7-2	-		+	1.75985	-1.87187	-3.49464	17.1638	15.8046	16.1794	15.855	16.5266	NaN	15.0641	13.8039	6.64e-05	7.11e-05	43661.37;43661.37-2	2	2	2	2	2	NaN	1	1
PSMD9	26S proteasome non-ATPase regulatory subunit 9	O00233	O00233	-		+	5.44067	-1.83909	-16.1185	17.6297	17.5826	17.6456	17.3513	17.5542	15.5206	15.9416	15.6786	6.93e-05	7.33e-05	24681.8	7	8	8	8	8	4	6	6
ATL1	Atlastin-1;Isoform 2 of Atlastin-1	Q8WXF7;Q8WXF7-2	Q8WXF7;Q8WXF7-2	-		+	3.80611	-1.80525	-8.38823	16.7244	16.277	16.0862	15.7553	16.1413	14.401	14.5006	14.2732	0.00016	0.000135	63543.5;63543.5-2	12	8	8	5	7	1	1	1
USE1	Vesicle transport protein USE1	Q9NZ43	Q9NZ43	-		+	6.08697	-1.80297	-20.737	17.0949	17.1326	17.2237	17.0287	17.1097	15.2445	15.52	15.1805	0.000517	0.000354	29371.1	4	4	4	4	4	1	4	2
RBPMS	Isoform C of RNA-binding protein with multiple splicing	Q93062-3	Q93062-3	-		+	3.235	-1.79063	-6.59912	17.0443	16.7125	16.1547	16.0487	16.6767	14.6754	15.0232	14.5117	0.000121	0.000109	24276.8	7	5	4	5	6	3	3	2
MRPL48	39S ribosomal protein L48, mitochondrial;Isoform 2 of 39S ribosomal protein L48, mitochondrial	Q96GC5;Q96GC5-3	Q96GC5;Q96GC5-3	+	LSU;Mitochondrial central dogma;Mitochondrial ribosome;Translation	+	4.23938	-1.77783	-10.0089	16.9523	16.9126	16.8045	16.7904	16.9068	14.6538	15.4609	15.1717	3.99e-05	5.2e-05	23934.78;23934.78-3	3	2	2	2	2	1	1	2
TSC22D2	TSC22 domain family protein 2;Isoform 2 of TSC22 domain family protein 2	O75157;O75157-2	O75157;O75157-2	-		+	2.13502	-1.76403	-3.97465	16.9425	17.2019	16.7942	16.1407	16.8891	14.2574	14.8254	16.0062	0.000915495	0.00055919	79228.22;79228.22-2	2	2	2	2	2	2	2	1
MAP4	Microtubule-associated protein 4;Isoform 6 of Microtubule-associated protein 4	P27816;P27816-6	P27816;P27816-6	-		+	3.93493	-1.76277	-8.84402	18.6099	18.5549	18.3977	17.8383	18.5236	16.7502	16.4472	16.6689	1.57e-06	3.26e-05	121004.97;121004.97-6	48	44	44	41	49	15	18	16
RAP2C	Ras-related protein Rap-2c	Q9Y3L5	Q9Y3L5	-		+	4.77098	-1.73633	-12.3808	17.1513	17.444	17.7467	17.3418	17.2589	15.5646	15.6564	15.7357	0.00164744	0.00091092	20744.8	1	1	1	1	1	2	1	1
MTX2	Metaxin-2;Isoform 2 of Metaxin-2	O75431;O75431-2	O75431;O75431-2	+	Protein import, sorting and homeostasis;Intramitochondrial membrane interactions;Mitochondrial dynamics and surveillance;Protein import and sorting;SAM	+	4.40788	-1.7353	-10.7112	15.9265	15.8937	16.4282	16.0723	15.9634	14.5544	14.0968	14.3134	0.000225311	0.000177	29763.18;29763.18-2	4	4	3	4	3	1	1	1
HACL1	2-hydroxyacyl-CoA lyase 1;Isoform 2 of 2-hydroxyacyl-CoA lyase 1;Isoform 3 of 2-hydroxyacyl-CoA lyase 1;Isoform 4 of 2-hydroxyacyl-CoA lyase 1	Q9UJ83;Q9UJ83-2;Q9UJ83-3;Q9UJ83-4	Q9UJ83;Q9UJ83-2;Q9UJ83-3;Q9UJ83-4	-		+	4.23651	-1.73496	-9.99731	15.7474	16.174	16.5144	16.3675	16.2167	14.5172	14.4814	14.4085	0.016	0.00656	63728.58;63728.58-2;63728.58-3;63728.58-4	1	1	1	1	1	1	2	1
APBB1	Amyloid-beta A4 precursor protein-binding family B member 1;Isoform 2 of Amyloid-beta A4 precursor protein-binding family B member 1	O00213;O00213-2	O00213;O00213-2	-		+	2.86576	-1.7291	-5.61481	18.2607	18.128	17.9704	17.519	18.0656	15.7851	16.0448	16.949	0.00184	0.000998	77244.19;77244.19-2	4	3	2	3	5	1	2	4
GSTM5	Glutathione S-transferase Mu 5	P46439	P46439	-		+	2.72401	-1.71391	-7.28396	NaN	18.6418	17.8416	NaN	18.1186	16.4516	16.496	16.5126	0.00278	0.00132	25674.7	NaN	2	2	NaN	2	4	2	3
ORMDL3	ORM1-like protein 3;Isoform 2 of ORM1-like protein 3	Q8N138;Q8N138-4	Q8N138;Q8N138-4	-		+	5.75245	-1.69846	-18.2061	16.4144	16.2902	16.1753	16.1589	16.2725	14.3774	14.699	14.6151	6.57e-06	3.31e-05	17494.65;17494.65-4	2	2	1	2	1	2	1	2
RRAS2	Ras-related protein R-Ras2;Isoform 4 of Ras-related protein R-Ras2	P62070;P62070-4	P62070;P62070-4	-		+	4.05371	-1.69668	-9.28333	17.3735	17.7073	17.0898	16.9778	17.4509	15.5529	15.7773	15.5393	0.000103	9.72e-05	23399.56;23399.56-4	9	9	9	9	9	5	5	7
UBQLN2	Ubiquilin-2	Q9UHD9	Q9UHD9	-		+	3.77682	-1.68479	-8.2875	17.3202	17.1754	17.0193	16.5665	17.3185	15.3075	15.2625	15.6157	2.43e-05	4.16e-05	65696.1	5	4	4	4	5	3	4	2
PPP1R18	Phostensin	Q6NYC8	Q6NYC8	-		+	2.24628	-1.67994	-4.20222	17.8064	17.6672	17.5523	16.2259	17.6114	15.8621	15.8027	15.4133	3.23e-05	4.72e-05	67942.6	18	14	17	12	18	5	8	5
C5orf51	UPF0600 protein C5orf51	A6NDU8	A6NDU8	-		+	5.50827	-1.6746	-16.5505	18.1438	18.2152	18.2206	18.2842	17.8977	16.3643	16.5842	16.4847	0.000278291	0.000210949	33620.4	2	3	2	2	2	2	4	2
TMOD3	Tropomodulin-3	Q9NYL9	Q9NYL9	-		+	5.99059	-1.6593	-19.9746	17.5548	17.569	17.5185	17.2564	17.4481	15.7424	15.7924	15.8955	1.96e-05	3.74e-05	39594.8	16	16	16	15	15	10	7	7
MRPS17	28S ribosomal protein S17, mitochondrial	Q9Y2R5	Q9Y2R5	+	Mitochondrial central dogma;Mitochondrial ribosome;SSU;Translation	+	4.47016	-1.64048	-10.982	17.1203	17.4811	16.8623	17.1568	17.2705	15.4873	15.7101	15.4158	0.00111413	0.000660183	14502.1	2	2	3	3	2	2	2	2
PRCC	Proline-rich protein PRCC	Q92733	Q92733	-		+	1.58377	-1.61304	-3.12599	15.8674	15.4141	15.6455	14.4713	16.0826	NaN	13.4704	14.2959	0.000878155	0.000539765	52417.8	1	1	2	1	1	NaN	1	1
NFKBIB	NF-kappa-B inhibitor beta;Isoform 2 of NF-kappa-B inhibitor beta	Q15653;Q15653-2	Q15653;Q15653-2	-		+	3.58748	-1.60415	-9.1706	16.2113	15.6743	16.0658	15.7303	15.9212	NaN	14.2267	14.4062	0.002	0.00107	37771.08;37771.08-2	2	2	2	2	2	NaN	2	1
BID	BH3-interacting domain death agonist;Isoform 2 of BH3-interacting domain death agonist	P55957;P55957-2	P55957;P55957-2	+	Apoptosis;Mitochondrial dynamics and surveillance	+	3.68651	-1.59733	-7.98341	17.2554	17.4915	16.8053	16.9184	16.9352	15.4704	15.7429	15.2381	0.000209527	0.000166937	21994.69;21994.69-2	4	4	3	4	4	2	3	2
SESN2	Sestrin-2	P58004	P58004	-		+	1.39264	-1.59513	-2.60315	15.1279	17.6224	15.6815	15.7174	15.2436	14.4342	13.9656	14.4505	0.00368759	0.00160928	54493.7	1	1	1	1	1	1	1	1
DCLK1	Serine/threonine-protein kinase DCLK1;Isoform 1 of Serine/threonine-protein kinase DCLK1	O15075;O15075-2	O15075;O15075-2	-			1.06905	-1.59422	-2.27452	16.5366	14.7529	16.5864	NaN	16.7222	14.5774	NaN	14.5332	1.84e-05	3.66e-05	82223.99;82223.99-2	5	4	7	NaN	5	1	NaN	1
CCDC50	Coiled-coil domain-containing protein 50	Q8IVM0	Q8IVM0	-		+	3.94998	-1.5896	-8.89865	16.8403	16.6662	16.6322	16.1391	16.7491	15.1765	14.8292	15.0417	8.46e-05	8.52e-05	35822	7	6	7	6	8	1	3	1
COPE	Coatomer subunit epsilon	O14579	O14579	-		+	5.40518	-1.58247	-15.8959	18.1818	18.3199	18.2639	18.0973	17.9701	16.4698	16.7287	16.5539	6.61e-05	7.1e-05	34482	10	10	10	10	9	6	5	7
STX7	Syntaxin-7;Isoform 2 of Syntaxin-7	O15400;O15400-2	O15400;O15400-2	-		+	5.46236	-1.58049	-16.2559	18.1905	18.1134	18.1264	17.9667	17.8665	16.4611	16.6119	16.3436	4e-05	5.21e-05	29815.53;29815.53-2	6	5	6	6	6	4	5	5
DNAJC1	DnaJ homolog subfamily C member 1	Q96KC8	Q96KC8	-		+	2.73848	-1.5778	-5.30215	16.5532	16.2723	16.5032	16.6824	16.2497	15.4076	15.0717	14.1438	0.000659	0.000431	63882.9	5	5	8	7	6	2	3	2
RRBP1	Ribosome-binding protein 1	Q9P2E9	Q9P2E9	-		+	6.49275	-1.57522	-24.2707	18.3673	18.493	18.5197	18.5907	18.375	16.835	16.9736	16.8732	3.78e-06	3.26e-05	152456	53	50	50	51	52	45	46	47
NDUFB11	NADH dehydrogenase [ubiquinone] 1 beta subcomplex subunit 11, mitochondrial;Isoform 2 of NADH dehydrogenase [ubiquinone] 1 beta subcomplex subunit 11, mitochondrial	Q9NX14;Q9NX14-2	Q9NX14;Q9NX14-2	+	CI subunits;Complex I;OXPHOS;OXPHOS subunits	+	3.93745	-1.57436	-8.85314	16.2758	16.4336	16.293	16.3798	16.0923	14.2874	14.9941	14.8802	3.22e-05	4.72e-05	17316.65;17316.65-2	2	2	2	2	2	2	2	2
PDLIM2	PDZ and LIM domain protein 2;Isoform 5 of PDZ and LIM domain protein 2	Q96JY6;Q96JY6-5	Q96JY6;Q96JY6-5	-		+	4.40624	-1.57414	-10.7042	18.2277	18.324	18.5709	17.982	18.1354	16.7811	16.747	16.4935	6.79e-05	7.23e-05	37458.88;37458.88-5	6	6	6	4	6	2	2	1
TEX2	Testis-expressed protein 2;Isoform 2 of Testis-expressed protein 2	Q8IWB9;Q8IWB9-2	Q8IWB9;Q8IWB9-2	-		+	5.77421	-1.57384	-18.3611	17.2995	17.3053	17.1129	17.1012	17.0894	15.5511	15.7565	15.5158	0.00145	0.000818	125302.69;125302.69-2	6	5	5	4	5	1	3	3
PTGS1	Prostaglandin G/H synthase 1;Isoform 2 of Prostaglandin G/H synthase 1;Isoform 3 of Prostaglandin G/H synthase 1;Isoform 4 of Prostaglandin G/H synthase 1;Isoform 5 of Prostaglandin G/H synthase 1;Isoform 6 of Prostaglandin G/H synthase 1	P23219;P23219-2;P23219-3;P23219-4;P23219-5;P23219-6	P23219;P23219-2;P23219-3;P23219-4;P23219-5;P23219-6	-		+	3.59344	-1.57198	-7.67998	17.3542	17.4889	17.3523	17.5052	18.108	16.0417	16.1555	15.7721	2.01e-05	3.79e-05	68686.35;68686.35-2;68686.35-3;68686.35-4;68686.35-5;68686.35-6	9	7	7	7	8	3	4	3
HMGA2	High mobility group protein HMGI-C	P52926	P52926	-		+	2.66777	-1.56707	-5.13381	17.0216	16.5591	16.1851	16.7525	17.4729	15.3257	14.9664	15.4014	0.00111	0.000658	11832	3	3	3	3	3	2	1	2
QKI	Protein quaking;Isoform 2 of Protein quaking;Isoform 3 of Protein quaking;Isoform 4 of Protein quaking;Isoform 5 of Protein quaking;Isoform 6 of Protein quaking	Q96PU8;Q96PU8-3;Q96PU8-5;Q96PU8-6;Q96PU8-8;Q96PU8-9	Q96PU8;Q96PU8-3;Q96PU8-5;Q96PU8-6;Q96PU8-8;Q96PU8-9	-		+	4.37201	-1.56649	-10.5581	17.7317	17.5331	17.5581	17.1074	17.395	15.7901	16.0328	15.8728	0.00014	0.000122	37670.64;37670.64-3;37670.64-5;37670.64-6;37670.64-8;37670.64-9	6	7	6	6	6	3	3	3
EPS15L1	Epidermal growth factor receptor substrate 15-like 1;Isoform 2 of Epidermal growth factor receptor substrate 15-like 1;Isoform 3 of Epidermal growth factor receptor substrate 15-like 1	Q9UBC2;Q9UBC2-2;Q9UBC2-3	Q9UBC2;Q9UBC2-2;Q9UBC2-3	-		+	5.70202	-1.55184	-17.8516	16.9878	16.9909	16.8467	16.7368	16.8746	15.1736	15.4024	15.4305	1.15e-05	3.36e-05	94255.08;94255.08-2;94255.08-3	20	18	18	14	21	2	6	5
SCAMP1	Secretory carrier-associated membrane protein 1	O15126	O15126	-		+	2.06321	-1.5504	-3.83136	17.1915	17.1874	17.0305	17.1786	17.0907	16.6797	14.9265	15.1497	0.000271	0.000206	37920.4	4	4	4	4	4	1	2	2
DNAJB4	DnaJ homolog subfamily B member 4	Q9UDY4	Q9UDY4	-		+	2.52236	-1.55025	-4.79908	18.417	17.8159	16.9769	17.752	18.1377	16.2898	16.2447	16.2745	3.25e-05	4.72e-05	37806.8	11	10	8	9	10	5	7	6
STK11IP	Serine/threonine-protein kinase 11-interacting protein	Q8N1F8	Q8N1F8	-		+	1.44627	-1.53901	-2.69555	15.2906	15.5356	15.701	15.8449	15.6183	12.5365	14.7212	14.9195	0.00212	0.00111	120259	3	4	3	3	3	2	2	1
CLGN	Calmegin	O14967	O14967	-			0.911906	-1.53895	-2.1345	16.1566	NaN	15.2597	NaN	16.0083	NaN	15.1086	13.4299	0.000663	0.000433	70038.6	5	NaN	4	NaN	5	NaN	1	1
ST13	Hsc70-interacting protein	P50502	P50502	-		+	5.5446	-1.53867	-16.7873	19.1715	18.957	19.1003	18.9567	18.7978	17.4506	17.5338	17.3896	1.91e-05	3.68e-05	41331.7	9	9	9	10	9	8	8	8
STX12	Syntaxin-12	Q86Y82	Q86Y82	-		+	5.7624	-1.53458	-18.2768	18.2498	17.9656	18.1433	18.0028	18.0594	16.4754	16.6838	16.4896	8e-06	3.32e-05	31641.9	8	7	7	9	9	6	5	6
FMN2	Formin-2	Q9NZ56	Q9NZ56	-		+	2.68538	-1.5327	-5.17538	16.5099	16.1675	15.8591	15.6653	16.2507	15.0384	14.0025	14.6325	0.000105456	9.89e-05	180106	14	12	7	9	14	2	2	2
OVCA2	Esterase OVCA2	Q8WZ82	Q8WZ82	-		+	4.68819	-1.5279	-11.9802	17.3297	17.5973	17.4309	17.2543	17.3822	15.8038	15.6703	16.139	0.00122904	0.000713285	24418	3	5	3	3	3	2	2	4
NMRAL1	NmrA-like family domain-containing protein 1	Q9HBL8	Q9HBL8	-		+	2.1426	-1.52267	-3.98993	14.1602	15.3718	15.3546	15.3497	15.293	13.2383	14.1671	13.3442	0.00273	0.00131	33344.4	3	3	4	3	3	1	1	2
COPS6	COP9 signalosome complex subunit 6	Q7L5N1	Q7L5N1	-		+	5.911	-1.51581	-19.3657	17.0124	17.0329	17.0386	16.9218	16.9591	15.3058	15.6484	15.4772	2.59e-05	4.27e-05	36163.5	11	11	11	11	10	8	7	9
EEF1D	Elongation factor 1-delta	P29692	P29692	-		+	6.70683	-1.51454	-26.3667	19.2074	19.1906	19.1257	19.0902	19.0013	17.5303	17.6613	17.6338	1.17e-05	3.36e-05	31121.8	14	13	13	13	13	13	13	13
HNRNPH3	Heterogeneous nuclear ribonucleoprotein H3;Isoform 2 of Heterogeneous nuclear ribonucleoprotein H3	P31942;P31942-2	P31942;P31942-2	-		+	4.1439	-1.50528	-9.62968	19.3543	19.3464	19.1727	18.9891	19.5152	17.5999	17.6682	18.0426	2.43e-05	4.16e-05	36926.49;36926.49-2	7	7	7	7	6	6	6	7
C4A	Complement C4-A;Isoform 2 of Complement C4-A	P0C0L4;P0C0L4-2	P0C0L4;P0C0L4-2			+	4.38006	-1.50343	-10.5923	18.1804	17.5486	17.9211	17.7581	17.7735	16.3467	16.3888	16.2631	7.82e-05	8.02e-05	192785.48;192785.48-2	10	10	10	10	9	4	4	4
DDX41	Probable ATP-dependent RNA helicase DDX41	Q9UJV9	Q9UJV9	-			0.621696	-1.49669	-1.46583	NaN	NaN	NaN	14.6701	17.4056	14.5089	14.6279	14.4867	0.0187898	0.00762146	69837.6	NaN	NaN	NaN	2	1	2	2	4
PDLIM4	PDZ and LIM domain protein 4	P50479	P50479	-		+	3.56082	-1.49335	-7.57599	18.3872	18.2247	18.5927	17.7334	18.3927	16.6769	16.8369	16.8046	2.04e-05	3.83e-05	35398	12	11	12	12	12	7	11	11
TOM1L2	TOM1-like protein 2	Q6ZVM7	Q6ZVM7	-		+	3.20032	-1.48956	-6.50142	17.0481	17.2161	16.5942	16.5555	17.2148	15.1264	15.6828	15.4993	8.92e-06	3.33e-05	55556.4	9	12	8	6	10	4	5	4
NFYC	Nuclear transcription factor Y subunit gamma;Isoform 1 of Nuclear transcription factor Y subunit gamma;Isoform 2 of Nuclear transcription factor Y subunit gamma;Isoform 5 of Nuclear transcription factor Y subunit gamma;Isoform 6 of Nuclear transcription factor Y subunit gamma;Isoform 7 of Nuclear transcription factor Y subunit gamma	Q13952;Q13952-2;Q13952-3;Q13952-5;Q13952-6;Q13952-7	Q13952;Q13952-2;Q13952-3;Q13952-5;Q13952-6;Q13952-7	-		+	1.62614	-1.48849	-3.0116	16.541	16.1511	15.8561	14.6818	15.8064	13.5846	14.6019	14.7697	0.000102205	9.67e-05	50302.41;50302.41-2;50302.41-3;50302.41-5;50302.41-6;50302.41-7	2	1	1	1	2	1	1	2
ZFP36L2	mRNA decay activator protein ZFP36L2	P47974	P47974	-		+	1.66496	-1.48331	-3.08121	17.9875	17.2705	16.9135	16.0783	17.481	15.4284	15.2826	16.2775	0.000157	0.000133	51062.8	2	3	3	2	2	1	1	1
AHNAK	Neuroblast differentiation-associated protein AHNAK	Q09666	Q09666	-		+	4.67546	-1.48321	-11.9197	19.0507	19.0946	18.8216	18.5972	18.9964	17.4157	17.3765	17.4945	6.79e-07	3.26e-05	629101	374	363	364	333	383	291	295	292
NOB1	RNA-binding protein NOB1	Q9ULX3	Q9ULX3	-		+	3.56993	-1.47957	-7.60492	16.1836	16.2053	15.9134	15.775	16.2371	14.1946	14.8975	14.6578	0.000122248	0.000109767	46674.9	4	5	5	3	4	1	1	2
SNX21	Sorting nexin-21	Q969T3	Q969T3	-		+	4.85541	-1.46944	-12.8022	16.6813	16.713	16.6995	16.2969	16.6801	15.203	15.0246	15.2065	0.00141	0.000802	41365.4	3	5	3	1	4	1	1	1
CLU	Clusterin;Isoform 2 of Clusterin;Isoform 3 of Clusterin;Isoform 4 of Clusterin;Isoform 5 of Clusterin;Isoform 6 of Clusterin	P10909;P10909-2;P10909-3;P10909-4;P10909-5;P10909-6	P10909;P10909-2;P10909-3;P10909-4;P10909-5;P10909-6	mito-interacting		+	2.73423	-1.45471	-5.29191	15.9153	16.3133	15.6821	16.133	16.3359	15.1471	14.6105	14.1061	0.000235	0.000183	52494.57;52494.57-2;52494.57-3;52494.57-4;52494.57-5;52494.57-6	2	2	3	1	1	1	2	3
WASHC2A	WASH complex subunit 2A	Q641Q2	Q641Q2	-		+	2.62997	-1.45335	-5.68631	16.3564	15.5937	16.3239	16.3095	16.1383	NaN	14.8625	14.5195	0.000178	0.000147	147184	4	4	3	3	3	NaN	1	2
YIPF5	Protein YIPF5;Isoform 3 of Protein YIPF5	Q969M3;Q969M3-3	Q969M3;Q969M3-3	-		+	6.27911	-1.44212	-22.3425	18.1907	18.2294	18.2945	18.0169	18.212	16.7975	16.7274	16.7148	9.89e-05	9.48e-05	27989.27;27989.27-3	2	2	2	2	2	2	2	2
KRI1	Protein KRI1 homolog	Q8N9T8	Q8N9T8	-		+	2.49525	-1.4408	-5.29809	15.9351	15.0521	15.0938	15.4076	15.2263	NaN	13.8209	13.9834	0.00260509	0.00127168	82598.1	7	5	4	4	3	NaN	2	2
RHBDD1	Rhomboid-related protein 4	Q8TEB9	Q8TEB9	-		+	5.64093	-1.4345	-17.431	16.2103	16.459	16.4788	16.2118	16.3822	14.8409	14.957	14.9439	0.00203209	0.0010807	35823	2	3	2	1	3	1	2	2
HSPB7	Heat shock protein beta-7	Q9UBY9	Q9UBY9	-		+	1.7449	-1.42189	-3.22635	18.5993	18.3909	18.6213	17.5655	19.6061	17.1099	17.33	16.9643	7.16e-06	3.31e-05	18610.5	9	9	9	8	9	7	7	8
SF1	Splicing factor 1;Isoform 2 of Splicing factor 1;Isoform 3 of Splicing factor 1;Isoform 4 of Splicing factor 1;Isoform 6 of Splicing factor 1	Q15637;Q15637-2;Q15637-3;Q15637-4;Q15637-6	Q15637;Q15637-2;Q15637-3;Q15637-4;Q15637-6	-		+	6.31966	-1.42182	-22.6965	17.1595	17.2046	17.119	17.035	17.2792	15.8081	15.7424	15.6624	3.87e-05	5.13e-05	68329.88;68329.88-2;68329.88-3;68329.88-4;68329.88-6	10	10	9	7	10	7	6	8
AKAP2	Isoform 4 of A-kinase anchor protein 2	Q9Y2D5-6	Q9Y2D5-6			+	2.38458	-1.4204	-4.4952	17.7208	17.4465	17.1728	16.4153	17.5377	15.7242	16.066	15.7244	1.17e-05	3.36e-05	120630	35	30	31	26	32	9	12	11
AKT1S1	Proline-rich AKT1 substrate 1	Q96B36	Q96B36	-		+	4.30425	-1.41339	-10.2742	18.0815	18.0956	17.8967	17.8348	17.9283	16.5482	16.8391	16.2747	0.000208	0.000166	27383.3	3	4	3	3	3	3	2	2
CDKN1A	Cyclin-dependent kinase inhibitor 1	P38936	P38936	-		+	2.23111	-1.41063	-4.17078	17.9416	17.8934	16.6013	17.4596	17.7719	15.9496	16.295	16.1242	1.75e-05	3.6e-05	18119.3	3	2	1	1	3	2	2	1
MRPL44	39S ribosomal protein L44, mitochondrial	Q9H9J2	Q9H9J2	+	LSU;Mitochondrial central dogma;Mitochondrial ribosome;Translation	+	5.72321	-1.40624	-17.9997	16.8355	16.7015	16.651	16.5918	16.8277	15.2752	15.2358	15.4348	0.000263029	0.000201338	37535.4	8	9	8	8	7	2	3	3
KRT19	Keratin, type I cytoskeletal 19	P08727	P08727	-			1.26217	-1.4012	-2.38117	17.5457	16.6608	17.2272	16.2842	16.5141	16.0836	14.0798	16.1723	0.000140852	0.000122	44106	11	11	14	6	10	1	2	1
FAU	40S ribosomal protein S30	P62861	P62861			+	4.40667	-1.40068	-10.706	22.0447	22.0029	22.1844	21.6881	22.1976	20.7372	20.6066	20.5247	5.83e-05	6.55e-05	6647.85	1	1	2	1	1	1	1	1
TRIOBP	TRIO and F-actin-binding protein;Isoform 3 of TRIO and F-actin-binding protein;Isoform 4 of TRIO and F-actin-binding protein;Isoform 1 of TRIO and F-actin-binding protein;Isoform 7 of TRIO and F-actin-binding protein	Q9H2D6;Q9H2D6-2;Q9H2D6-3;Q9H2D6-5;Q9H2D6-7	Q9H2D6;Q9H2D6-2;Q9H2D6-3;Q9H2D6-5;Q9H2D6-7	-		+	5.12444	-1.40046	-14.2368	17.0731	17.4507	17.2989	17.1696	17.1744	15.951	15.8137	15.734	4.63e-05	5.66e-05	261375.57;261375.57-2;261375.57-3;261375.57-5;261375.57-7	24	24	25	23	24	7	8	7
PAK1	Serine/threonine-protein kinase PAK 1	Q13153	Q13153	-		+	2.52514	-1.3974	-4.80534	17.4668	17.329	17.0447	17.0025	17.3588	15.1536	16.3754	15.9999	1.48e-05	3.47e-05	60646.9	8	9	7	6	8	3	4	5
POLR2C	DNA-directed RNA polymerase II subunit RPB3	P19387	P19387	-		+	2.90302	-1.39382	-5.70878	16.8321	16.6339	16.5971	16.6067	16.8376	14.6701	15.6058	15.647	1.5e-05	3.47e-05	31441.2	8	6	7	6	9	2	4	3
PPP1R2	Protein phosphatase inhibitor 2	P41236	P41236	-		+	5.25266	-1.39235	-14.973	16.5591	16.4644	16.6273	16.2319	16.4689	15.0407	15.1505	15.0427	2.09e-05	3.86e-05	23015.2	3	3	3	3	2	1	1	1
MTX1	Metaxin-1;Isoform 3 of Metaxin-1	Q13505;Q13505-3	Q13505;Q13505-3	+	Protein import, sorting and homeostasis;Intramitochondrial membrane interactions;Mitochondrial dynamics and surveillance;Protein import and sorting;SAM	+	6.81769	-1.39048	-27.5211	16.3484	16.376	16.3964	16.2206	16.2326	14.9376	14.9432	14.8923	0.000191198	0.000154918	51462.84;51462.84-3	5	6	6	6	7	3	2	3
PBLD	Phenazine biosynthesis-like domain-containing protein	P30039	P30039	-		+	4.82257	-1.38305	-12.6367	16.2256	16.5943	16.2213	16.5176	16.4932	15.087	15.0584	14.9368	0.000788017	0.000494359	31785.3	4	3	3	4	5	2	2	2
SRA1	Steroid receptor RNA activator 1	Q9HD15	Q9HD15	-		+	2.06165	-1.37891	-4.17742	16.786	16.328	16.9067	16.517	16.8858	NaN	15.8171	14.7945	0.00227903	0.00116979	25673	6	5	5	6	5	NaN	2	1
LRRC57	Leucine-rich repeat-containing protein 57	Q8N9N7	Q8N9N7	-		+	3.92987	-1.37612	-10.8102	16.354	16.2064	16.3124	16.4272	16.0585	14.7663	15.0248	NaN	0.00865488	0.00365369	26754.2	3	4	4	4	3	2	2	NaN
NENF	Neudesin	Q9UMX5	Q9UMX5	-		+	3.9852	-1.37174	-9.02764	16.5625	16.7678	17.1381	16.7297	16.6655	15.5026	15.5133	15.187	0.000779543	0.000490358	18856.4	3	6	5	5	5	1	2	1
RPSA	40S ribosomal protein SA	P08865	P08865	-		+	5.92611	-1.36276	-19.4799	19.7579	19.6924	19.8252	19.6961	19.7524	18.2193	18.4213	18.5055	6.86e-06	3.31e-05	32854.1	14	14	14	14	15	14	14	13
LRRC59	Leucine-rich repeat-containing protein 59	Q96AG4	Q96AG4	-		+	6.06193	-1.36006	-20.5362	19.205	19.0922	19.2581	18.9735	19.1446	17.7878	17.7908	17.7453	3.9e-05	5.13e-05	34930.4	12	12	12	12	12	10	12	10
ZDHHC5	Palmitoyltransferase ZDHHC5;Isoform 2 of Palmitoyltransferase ZDHHC5	Q9C0B5;Q9C0B5-2	Q9C0B5;Q9C0B5-2	-		+	3.02751	-1.35944	-6.0312	15.7366	15.8742	16.0604	15.1214	15.8729	14.5194	14.398	14.2035	0.000448701	0.000315777	77544.73;77544.73-2	4	2	3	2	3	1	1	3
TMSB10	Thymosin beta-10	P63313	P63313	-		+	2.61689	-1.35821	-5.01497	17.7153	17.3358	17.3193	16.5084	17.4567	15.9435	15.8495	15.9337	0.000129139	0.000114551	5025.67	4	3	3	1	4	1	1	1
PFDN5	Prefoldin subunit 5	Q99471	Q99471	-			0.696287	-1.35633	-1.52797	13.7642	14.1726	15.9267	13.247	NaN	NaN	12.6509	13.1917	0.00851707	0.00359811	17328.1	1	1	1	1	NaN	NaN	1	1
NFASC	Isoform 12 of Neurofascin;Isoform 4 of Neurofascin;Isoform 9 of Neurofascin	O94856-12;O94856-4;O94856-9	O94856-12;O94856-4;O94856-9	-		+	3.13297	-1.35627	-6.3149	16.8224	17.2095	16.5236	16.5704	17.0922	15.5986	15.6839	15.1796	0.000128777	0.000114273	119469.55;119911.03;137608.77	5	7	6	5	8	2	3	2
TRADD	Tumor necrosis factor receptor type 1-associated DEATH domain protein	Q15628	Q15628	-		+	3.77034	-1.35113	-8.26536	17.0687	17.0902	17.1126	16.5721	17.0383	15.8623	15.5739	15.4395	0.0020101	0.00107096	34247	8	7	7	6	6	3	3	2
STX8	Syntaxin-8	Q9UNK0	Q9UNK0	-		+	4.46591	-1.34527	-10.9633	16.801	17.0124	16.9558	16.804	16.5652	15.5264	15.6117	15.3091	0.00067505	0.000437931	26906.7	7	6	6	7	5	4	3	4
NUCKS1	Nuclear ubiquitous casein and cyclin-dependent kinase substrate 1	Q9H1E3	Q9H1E3	-		+	5.34983	-1.34305	-15.5549	17.6813	17.6776	18.0039	17.9023	17.8754	16.4971	16.4588	16.4994	9.53e-06	3.34e-05	27296.4	4	4	5	5	4	3	3	3
MRPL13	39S ribosomal protein L13, mitochondrial	Q9BYD1	Q9BYD1	+	LSU;Mitochondrial central dogma;Mitochondrial ribosome;Translation	+	3.6477	-1.33265	-7.85568	16.9691	17.0386	16.8834	16.7955	16.9763	15.1665	15.8727	15.7606	0.000504	0.000347	20692	7	6	6	5	6	3	4	2
AHNAK2	Isoform 3 of Protein AHNAK2	Q8IVF2-3	Q8IVF2-3	-		+	2.53468	-1.32848	-4.82687	17.925	17.0981	17.0693	16.6952	17.402	15.8589	15.8763	15.9931	8.4e-06	3.33e-05	605648	118	105	97	78	106	49	57	58
SGTB	Small glutamine-rich tetratricopeptide repeat-containing protein beta	Q96EQ0	Q96EQ0	-		+	2.75408	-1.3218	-5.33979	16.9983	16.7286	16.2259	15.9603	16.5046	15.2871	15.0896	15.1086	0.000133	0.000117	33429.4	7	6	6	3	5	2	4	3
LMO7	Isoform 3 of LIM domain only protein 7	Q8WWI1-3	Q8WWI1-3	-		+	5.03737	-1.32121	-13.7567	17.9035	17.9943	17.5802	17.8379	17.9294	16.51	16.5499	16.5237	1.93e-06	3.26e-05	153670	68	65	65	64	69	45	51	47
STAM	Signal transducing adapter molecule 1;Isoform 2 of Signal transducing adapter molecule 1	Q92783;Q92783-2	Q92783;Q92783-2	-		+	7.31732	-1.31768	-33.3746	16.9969	16.9007	16.9083	17.0391	16.9265	15.6047	15.6776	15.6277	4.67e-05	5.7e-05	59179.58;59179.58-2	9	9	10	10	9	7	6	7
TMA16	Translation machinery-associated protein 16	Q96EY4	Q96EY4	-		+	2.62162	-1.31682	-5.02594	15.8151	15.5776	16.3726	16.443	16.2854	14.432	15.0208	14.8931	0.00245	0.00123	23864.3	2	2	2	2	2	3	3	3
NDE1	Nuclear distribution protein nudE homolog 1;Isoform 2 of Nuclear distribution protein nudE homolog 1	Q9NXR1;Q9NXR1-1	Q9NXR1;Q9NXR1-1	-		+	2.30884	-1.31635	-4.33333	16.2204	16.2378	15.9638	15.8825	16.2261	14.01	15.2533	15.1061	0.000630306	0.000415	37720.56;37720.56-1	7	8	8	7	8	1	3	3
EPHB2	Ephrin type-B receptor 2;Isoform 2 of Ephrin type-B receptor 2;Isoform 3 of Ephrin type-B receptor 2	P29323;P29323-2;P29323-3	P29323;P29323-2;P29323-3	-			1.11776	-1.31598	-2.37686	17.8326	NaN	16.4117	NaN	16.0288	15.4938	15.5355	15.2959	0.000207	0.000165	117492.66;117492.66-2;117492.66-3	7	NaN	1	NaN	2	3	2	2
SPR	Sepiapterin reductase	P35270	P35270	+	Metabolism;Metals and cofactors;Tetrahydobiopterin synthesis	+	4.27737	-1.31362	-10.1635	17.7221	17.54	17.5745	17.2522	17.504	15.9877	16.2921	16.3351	0.000117412	0.000106655	28048.5	7	6	6	5	5	2	3	3
AARS2	Alanine--tRNA ligase, mitochondrial	Q5JTZ9	Q5JTZ9	+	Mitochondrial central dogma;mt-tRNA synthetases;Translation	+	3.66648	-1.3052	-7.91728	16.2331	16.2474	16.0191	15.7724	16.08	14.5191	14.7073	15.0692	0.0014	0.000796	107340	6	7	4	8	7	7	3	8
SMAP2	Stromal membrane-associated protein 2;Isoform 2 of Stromal membrane-associated protein 2;Isoform 3 of Stromal membrane-associated protein 2	Q8WU79;Q8WU79-2;Q8WU79-3	Q8WU79;Q8WU79-2;Q8WU79-3	-		+	2.35763	-1.30274	-4.43719	17.9437	17.6521	17.5544	17.6125	17.4178	17.0093	15.7358	16.255	0.000849	0.000525	46785.89;46785.89-2;46785.89-3	5	4	4	2	4	1	2	3
NSFL1C	NSFL1 cofactor p47;Isoform 3 of NSFL1 cofactor p47	Q9UNZ2;Q9UNZ2-5	Q9UNZ2;Q9UNZ2-5	-		+	3.70933	-1.3013	-8.05935	18.0623	18.0235	17.9531	17.428	17.9651	16.4655	16.6192	16.6707	3.22e-06	3.26e-05	40572.83;40572.83-5	16	15	16	12	14	10	12	12
SRRM2	Serine/arginine repetitive matrix protein 2	Q9UQ35	Q9UQ35	-		+	2.50737	-1.29403	-4.76541	17.3272	17.0351	16.9812	17.0463	17.2179	16.531	15.5138	15.4377	2.32e-05	4.08e-05	299615	20	18	17	10	20	1	3	2
PDLIM1	PDZ and LIM domain protein 1	O00151	O00151	-		+	3.18558	-1.28999	-6.46022	18.2254	18.4065	18.6993	17.8031	18.4397	17.08	17.0315	16.9629	2.05e-05	3.84e-05	36071.7	13	15	14	12	15	10	10	14
NDUFA7	NADH dehydrogenase [ubiquinone] 1 alpha subcomplex subunit 7	O95182	O95182	+	CI subunits;Complex I;OXPHOS;OXPHOS subunits	+	5.98364	-1.28939	-19.9208	16.062	16.0984	16.2677	16.0945	16.108	14.9453	14.8225	14.7424	0.000496	0.000342	12551.4	5	5	4	5	4	3	3	2
NOLC1	Nucleolar and coiled-body phosphoprotein 1;Isoform Beta of Nucleolar and coiled-body phosphoprotein 1;Isoform 3 of Nucleolar and coiled-body phosphoprotein 1	Q14978;Q14978-2;Q14978-3	Q14978;Q14978-2;Q14978-3	-		+	3.5783	-1.28532	-7.63157	16.9997	16.3828	16.6444	16.4451	16.8685	15.3851	15.2451	15.5182	0.000123375	0.000110443	73603.23;73603.23-2;73603.23-3	3	4	3	3	4	3	3	3
MRPL3	39S ribosomal protein L3, mitochondrial	P09001	P09001	+	LSU;Mitochondrial central dogma;Mitochondrial ribosome;Translation	+	5.03026	-1.28017	-13.7181	17.1876	17.0027	17.1362	16.9201	17.1733	15.6929	15.7484	15.9702	0.000286775	0.000216608	38632.6	2	2	2	2	2	2	2	2
RCN3	Reticulocalbin-3	Q96D15	Q96D15	-		+	2.88182	-1.27782	-5.65518	19.853	20.5694	20.5942	20.1609	19.8965	18.8815	19.145	18.7845	2.78e-06	3.26e-05	37493	12	12	12	12	12	12	12	12
ACTN1	Isoform 2 of Alpha-actinin-1	P12814-2	P12814-2	-		+	3.44481	-1.27751	-7.21548	18.3191	17.8112	17.5398	18.0638	18.0554	16.6403	16.7376	16.6632	1.17e-05	3.36e-05	102709	3	3	3	3	3	2	2	2
RPL17	60S ribosomal protein L17;Isoform 3 of 60S ribosomal protein L17	P18621;P18621-3	P18621;P18621-3	-		+	7.18378	-1.27593	-31.6992	18.8551	18.7776	18.8011	18.7094	18.8082	17.4611	17.5045	17.5774	2.33e-06	3.26e-05	21397.02;21397.02-3	11	9	9	9	10	8	8	8
NDUFS5	NADH dehydrogenase [ubiquinone] iron-sulfur protein 5	O43920	O43920	+	CI subunits;Complex I;OXPHOS;OXPHOS subunits	+	4.82122	-1.26749	-12.63	16.9503	17.1704	17.2367	17.1513	16.8449	15.7837	15.8533	15.7727	0.000729	0.000465	12517.5	6	6	6	6	6	6	6	3
TMOD2	Tropomodulin-2	Q9NZR1	Q9NZR1	-		+	1.94445	-1.26708	-3.60016	17.3842	16.7977	16.6278	16.0516	16.8662	15.8094	15.7057	14.9201	0.000359886	0.000262347	39595	4	5	2	2	5	1	1	2
RBMX	RNA-binding motif protein, X chromosome	P38159	P38159	-		+	5.18221	-1.2634	-14.5641	18.141	18.2524	18.0257	17.9436	18.2113	16.9609	16.7812	16.8121	3.72e-06	3.26e-05	42331.8	12	9	9	10	12	8	8	8
STS	Steryl-sulfatase	P08842	P08842	-		+	2.44517	-1.26077	-4.6273	16.508	16.9804	16.6603	15.9747	17.1429	15.4543	15.3843	15.3389	0.00199	0.00106	65492.3	3	4	2	1	6	2	2	1
TBCA	Tubulin-specific chaperone A	O75347	O75347	-		+	3.53078	-1.26026	-7.48124	17.3182	17.265	17.164	16.8969	16.6491	15.7453	15.819	15.8309	3.18e-05	4.7e-05	12854.8	11	11	11	12	10	9	9	9
SMN1	Survival motor neuron protein;Isoform SMN-delta7 of Survival motor neuron protein	Q16637;Q16637-3	Q16637;Q16637-3			+	4.15697	-1.25726	-9.68084	16.6879	17.189	17.0421	17.0568	17.1262	15.7448	15.9088	15.6358	0.000259894	0.000199459	31848.72;31848.72-3	2	3	2	2	4	2	2	2
DCN	Decorin	P07585	P07585	-		+	2.37357	-1.25664	-5.86072	NaN	16.4002	15.9207	16.5793	16.3297	15.1303	14.9714	NaN	0.00116693	0.000684368	39746.8	NaN	1	3	6	2	1	2	NaN
STUB1	E3 ubiquitin-protein ligase CHIP	Q9UNE7	Q9UNE7	-		+	4.45126	-1.25511	-10.8992	17.1693	17.1221	16.7048	17.0578	17.0154	15.6599	15.8325	15.7839	9.7e-06	3.34e-05	34856.2	16	16	15	15	16	6	10	11
MICALL1	MICAL-like protein 1	Q8N3F8	Q8N3F8	-		+	2.80769	-1.24897	-6.2318	16.169	15.672	15.9544	15.6292	16.1975	NaN	14.6952	14.6557	0.00246	0.00123	93441.1	8	9	7	5	7	NaN	2	2
PQBP1	Polyglutamine-binding protein 1;Isoform 2 of Polyglutamine-binding protein 1;Isoform 5 of Polyglutamine-binding protein 1	O60828;O60828-2;O60828-5	O60828;O60828-2;O60828-5	-		+	4.89903	-1.24874	-13.0252	16.8359	16.8368	16.8207	16.7342	16.9405	15.3615	15.756	15.6372	0.00083	0.000516	30472.25;30472.25-2;30472.25-5	4	4	2	3	3	3	2	2
MRPS18B	28S ribosomal protein S18b, mitochondrial	Q9Y676	Q9Y676	+	Mitochondrial central dogma;Mitochondrial ribosome;SSU;Translation	+	4.64388	-1.24801	-11.7708	16.6525	16.5958	16.643	16.4902	16.3422	15.4891	15.2398	15.1614	0.000402874	0.000288207	29395.6	3	5	3	4	3	2	3	3
SON	Protein SON;Isoform D of Protein SON;Isoform G of Protein SON;Isoform I of Protein SON	P18583;P18583-5;P18583-7;P18583-9	P18583;P18583-5;P18583-7;P18583-9	-		+	4.43426	-1.24572	-10.8252	16.5629	16.3656	16.2946	16.2532	16.5366	15.1136	15.3617	14.9953	0.000242	0.000187	263829.97;263829.97-5;263829.97-7;263829.97-9	19	14	12	14	19	3	3	2
CAPZB	Isoform 2 of F-actin-capping protein subunit beta	P47756-2	P47756-2	-		+	7.65396	-1.2414	-37.9975	19.0446	19.0091	18.9302	18.9433	18.9929	17.759	17.771	17.6979	5.35e-06	3.26e-05	30628.7	22	21	20	21	21	19	18	17
MRPL55	39S ribosomal protein L55, mitochondrial;Isoform 2 of 39S ribosomal protein L55, mitochondrial	Q7Z7F7;Q7Z7F7-2	Q7Z7F7;Q7Z7F7-2	+	LSU;Mitochondrial central dogma;Mitochondrial ribosome;Translation	+	4.40993	-1.23811	-10.72	16.7334	16.6411	16.4862	16.5099	16.5482	15.1185	15.3353	15.5832	0.000137	0.00012	15128.36;15128.36-2	2	3	3	2	3	2	2	2
MFN1	Mitofusin-1	Q8IWA4	Q8IWA4	+	Fusion;Mitochondrial dynamics and surveillance;Organelle contact sites	+	3.13195	-1.2363	-6.31211	17.1722	17.3238	16.6393	16.8728	17.0022	15.497	15.7543	16.0459	0.00296127	0.00134682	84159.5	1	3	2	2	4	2	4	3
OGFR	Opioid growth factor receptor;Isoform 2 of Opioid growth factor receptor	Q9NZT2;Q9NZT2-2	Q9NZT2;Q9NZT2-2	-		+	1.68554	-1.23516	-3.11835	16.2747	16.4858	16.4181	16.1064	16.081	15.7111	15.3924	14.0107	0.000219	0.000173	73324.71;73324.71-2	7	9	4	5	8	2	3	2
MRPL15	39S ribosomal protein L15, mitochondrial	Q9P015	Q9P015	+	LSU;Mitochondrial central dogma;Mitochondrial ribosome;Translation	+	2.75444	-1.23058	-5.34064	16.759	16.6479	16.3335	16.518	16.6782	15.6287	14.7873	15.6542	0.000727823	0.000464766	33419.8	7	7	6	7	6	2	2	3
GLG1	Golgi apparatus protein 1;Isoform 2 of Golgi apparatus protein 1	Q92896;Q92896-2	Q92896;Q92896-2	-		+	6.09207	-1.22767	-20.7781	17.0183	17.1476	17.173	17.2959	17.1608	15.9446	15.9331	15.9167	1.35e-05	3.43e-05	134551.84;134551.84-2	25	30	28	29	27	18	19	20
ARHGAP29	Rho GTPase-activating protein 29	Q52LW3	Q52LW3	-		+	2.91063	-1.22752	-5.72812	16.8489	17.0395	16.2537	16.5078	16.9457	15.5713	15.258	15.6455	0.000327	0.000242	142064	13	16	9	9	16	3	3	3
PLEKHA5	Pleckstrin homology domain-containing family A member 5;Isoform 2 of Pleckstrin homology domain-containing family A member 5;Isoform 4 of Pleckstrin homology domain-containing family A member 5;Isoform 5 of Pleckstrin homology domain-containing family A member 5;Isoform 6 of Pleckstrin homology domain-containing family A member 5;Isoform 8 of Pleckstrin homology domain-containing family A member 5	Q9HAU0;Q9HAU0-2;Q9HAU0-4;Q9HAU0-5;Q9HAU0-6;Q9HAU0-8	Q9HAU0;Q9HAU0-2;Q9HAU0-4;Q9HAU0-5;Q9HAU0-6;Q9HAU0-8	-		+	3.84825	-1.22612	-8.53505	15.7416	15.3844	15.2651	15.2706	15.201	14.0632	14.3185	14.0575	0.00278	0.00132	127463.98;127463.98-2;127463.98-4;127463.98-5;127463.98-6;127463.98-8	2	1	3	2	2	1	1	1
MAP1A	Microtubule-associated protein 1A	P78559	P78559	-		+	4.35473	-1.22519	-10.485	17.7622	17.5279	17.3885	17.2405	17.5624	16.2689	16.2879	16.2564	8.23e-06	3.33e-05	305485	78	73	75	71	77	29	39	32
LEO1	RNA polymerase-associated protein LEO1	Q8WVC0	Q8WVC0	-		+	2.23747	-1.22062	-4.18395	16.9732	16.1786	16.1626	17.098	16.1119	15.3013	15.3383	15.2131	0.000711	0.000456	75404.1	2	3	3	2	3	4	5	4
NUDT15	Nucleotide triphosphate diphosphatase NUDT15	Q9NV35	Q9NV35	-			0.459635	-1.21998	-1.21925	16.3802	NaN	NaN	NaN	16.7807	14.3801	16.3408	NaN	0.00289	0.00133	18609	1	NaN	NaN	NaN	1	1	1	NaN
LPCAT2	Lysophosphatidylcholine acyltransferase 2	Q7L5N7	Q7L5N7	-		+	2.62238	-1.21148	-5.02772	17.1935	17.0683	16.6791	16.6482	16.231	15.7375	15.5604	15.3598	0.000117706	0.000106881	60207.9	10	10	7	7	7	5	4	4
YIF1B	Protein YIF1B;Isoform 3 of Protein YIF1B	Q5BJH7;Q5BJH7-3	Q5BJH7;Q5BJH7-3	-		+	2.55315	-1.20859	-4.86872	17.5351	17.4533	17.2977	17.3562	17.5222	15.5666	16.5794	16.5269	3.12e-05	4.66e-05	34435.43;34435.43-3	5	5	5	5	5	2	3	2
CEP170	Centrosomal protein of 170 kDa	Q5SW79	Q5SW79	-		+	1.91347	-1.20237	-3.54095	17.5153	16.5923	16.3591	15.9742	16.7094	15.4658	15.409	15.4083	6.49e-06	3.31e-05	175293	40	35	34	30	40	17	19	23
CCDC124	Coiled-coil domain-containing protein 124	Q96CT7	Q96CT7	-		+	4.22063	-1.20139	-9.93342	17.2848	17.6102	17.2759	17.3804	17.3094	16.2758	15.9305	16.3059	0.000153	0.000131	25835.2	7	6	7	6	7	2	3	2
UBXN7	UBX domain-containing protein 7	O94888	O94888	-		+	3.05398	-1.20051	-7.05704	16.5315	16.0919	16.5937	16.5687	16.6436	NaN	15.3403	15.2305	0.000967	0.000585	54862.3	6	8	5	6	9	NaN	2	3
NCBP3	Nuclear cap-binding protein subunit 3	Q53F19	Q53F19	-			0.629318	-1.19568	-1.35039	15.8334	15.5012	15.7409	13.6255	16.0543	15.0829	13.2279	NaN	0.000943236	0.000572994	70592.5	1	3	2	1	2	3	3	NaN
CERS2	Ceramide synthase 2	Q96G23	Q96G23	-		+	3.52918	-1.1881	-7.47621	17.775	17.5931	17.1839	17.6109	17.7216	16.5914	16.3443	16.2307	0.000438	0.000309	44876.2	4	4	4	4	4	4	4	4
SYAP1	Synapse-associated protein 1	Q96A49	Q96A49	-		+	1.39885	-1.18012	-2.75828	16.1788	15.4727	15.9651	15.234	15.8998	NaN	15.1665	13.9734	0.000136236	0.000119264	39933.4	12	12	11	8	9	NaN	1	2
VAPB	Vesicle-associated membrane protein-associated protein B/C	O95292	O95292	mito-interacting		+	5.67556	-1.17912	-17.6682	17.342	17.2187	17.1567	17.1536	17.3604	15.985	16.0937	16.1229	4.25e-05	5.41e-05	27228.4	6	6	6	6	6	3	4	4
CEP41	Centrosomal protein of 41 kDa	Q9BYV8	Q9BYV8	-		+	1.89655	-1.17778	-3.50882	15.6049	15.7992	15.7952	15.7348	15.8666	15.4145	14.4744	13.8581	0.00268	0.00129	41368.4	3	2	3	2	6	1	2	1
MRPS30	39S ribosomal protein S30, mitochondrial	Q9NP92	Q9NP92	+	LSU;Mitochondrial central dogma;Mitochondrial ribosome;Translation	+	5.00259	-1.17694	-13.5692	16.4104	16.4482	16.4499	16.2384	16.4347	15.1237	15.4064	15.1281	0.00287	0.00133	50364.7	3	3	3	5	5	1	1	2
DENR	Density-regulated protein	O43583	O43583	-		+	4.68895	-1.17573	-11.9838	16.9032	17.1065	17.0625	16.7288	17.0496	15.7767	15.7268	15.8796	0.000308077	0.000230688	22092	7	8	8	8	8	5	6	6
STAMBPL1	AMSH-like protease;Isoform 2 of AMSH-like protease	Q96FJ0;Q96FJ0-2	Q96FJ0;Q96FJ0-2	-		+	1.41032	-1.17347	-2.63352	15.774	15.1761	14.3574	15.3336	14.0658	13.4095	14.0716	13.8226	0.00635935	0.00272344	49783.13;49783.13-2	3	2	1	3	1	1	1	1
RXRA	Retinoic acid receptor RXR-alpha;Isoform 2 of Retinoic acid receptor RXR-alpha	P19793;P19793-2	P19793;P19793-2	-		+	2.4697	-1.17201	-5.22676	13.8885	14.6072	NaN	14.3262	14.5903	13.4266	13.0978	13.0187	0.0234405	0.00936497	50811.32;50811.32-2	1	1	NaN	1	1	1	2	1
CDC42EP1	Cdc42 effector protein 1;Isoform 2 of Cdc42 effector protein 1	Q00587;Q00587-2	Q00587;Q00587-2	-			0.777371	-1.1718	-1.61623	16.7225	16.1053	16.7176	15.828	17.1367	NaN	14.1802	16.4802	0.000685191	0.000443036	40294.81;40294.81-2	5	6	6	4	6	NaN	2	1
BCL10	B-cell lymphoma/leukemia 10	O95999	O95999	-		+	3.50535	-1.16957	-7.40179	16.6082	16.5562	16.4134	16.0792	16.5949	15.1331	15.516	15.1933	0.000318726	0.00023722	26251.6	4	3	4	2	4	2	2	1
ELOA	Elongin-A	Q14241	Q14241	-		+	3.72422	-1.16778	-8.1092	15.1085	15.0679	14.9218	14.8718	14.9047	14.0654	13.8883	13.4678	0.00172	0.000942	89908.8	4	2	5	2	7	3	4	3
FLOT2	Flotillin-2	Q14254	Q14254	-		+	4.71193	-1.16491	-12.0938	17.8062	17.7285	17.434	17.5109	17.5169	16.4437	16.4672	16.3923	1.03e-05	3.35e-05	47064.2	19	20	18	16	16	9	10	11
TPM1	Isoform 4 of Tropomyosin alpha-1 chain	P09493-4	P09493-4	-		+	2.26311	-1.16475	-4.23727	18.6636	18.8814	19.7687	19.4452	19.4223	18.104	18.1834	17.9271	1.15e-05	3.36e-05	32847.8	31	33	34	30	35	28	30	30
PMM1	Phosphomannomutase 1	Q92871	Q92871	-		+	2.39076	-1.16378	-4.50856	16.5217	16.5435	16.3506	16.0166	16.348	15.5476	15.4518	14.5774	0.000222663	0.000175668	29746.8	5	6	2	3	4	2	2	3
CTTNBP2NL	CTTNBP2 N-terminal-like protein	Q9P2B4	Q9P2B4	-		+	3.96708	-1.1636	-8.96109	16.2031	16.091	15.9427	15.8908	16.0963	14.6548	15.1506	14.8382	0.000674321	0.000437579	70158	11	10	8	6	8	3	6	6
MFF	Isoform 2 of Mitochondrial fission factor	Q9GZY8-2	Q9GZY8-2	+	Fission;Mitochondrial dynamics and surveillance	+	2.55981	-1.16346	-4.88387	16.2449	16.1289	16.1869	15.3855	16.0422	14.549	15.0898	14.8639	0.00246228	0.00123167	32973.5	5	4	5	4	5	1	1	1
DLGAP4	Disks large-associated protein 4;Isoform 2 of Disks large-associated protein 4;Isoform 3 of Disks large-associated protein 4	Q9Y2H0;Q9Y2H0-1;Q9Y2H0-3	Q9Y2H0;Q9Y2H0-1;Q9Y2H0-3	-		+	2.62101	-1.16174	-5.65983	15.9938	15.7982	15.55	15.6228	15.9534	14.8933	14.3505	NaN	0.00128301	0.000740381	108011.98;108011.98-1;108011.98-3	6	7	4	7	8	1	1	NaN
BOP1	Ribosome biogenesis protein BOP1	Q14137	Q14137	-		+	4.14074	-1.14865	-9.61735	16.817	16.802	16.8427	16.8577	16.8014	15.3606	15.9007	15.7652	7.86e-05	8.06e-05	83629.5	12	9	9	7	11	3	5	4
GADD45GIP1	Growth arrest and DNA damage-inducible proteins-interacting protein 1	Q8TAE8	Q8TAE8	+	LSU;Mitochondrial central dogma;Mitochondrial ribosome;Translation	+	4.02905	-1.1469	-9.19055	16.4951	16.6354	16.4602	16.2516	16.1323	15.2714	15.3161	15.1566	0.000124845	0.000111584	25383.8	7	6	7	5	6	5	6	3
TMEM205	Transmembrane protein 205	Q6UW68	Q6UW68	+	0	+	2.84632	-1.1462	-5.56623	16.5731	17.0908	17.4376	17.2491	17.1163	15.7434	16.0298	16.0683	0.000241425	0.000187126	21197.8	2	2	3	2	3	3	3	2
NMT2	Glycylpeptide N-tetradecanoyltransferase 2	O60551	O60551	-		+	3.90881	-1.14244	-8.7499	16.7263	16.8211	16.2766	16.7379	16.705	15.5766	15.4712	15.485	0.00075	0.000475	56980.2	6	5	5	6	6	3	2	3
APOL2	Apolipoprotein L2	Q9BQE5	Q9BQE5	mito-interacting		+	1.96061	-1.13711	-3.6312	17.1762	16.4784	17.1938	16.5225	16.8251	16.3155	15.2099	15.5808	3.67e-05	4.99e-05	37092.3	5	3	6	3	6	1	2	3
SH3GLB1	Endophilin-B1;Isoform 2 of Endophilin-B1	Q9Y371;Q9Y371-2	Q9Y371;Q9Y371-2	-		+	5.15797	-1.13702	-14.4259	17.5645	17.4893	17.5299	17.5473	17.5491	16.1966	16.5508	16.4495	2.49e-05	4.21e-05	40796.34;40796.34-2	9	10	10	10	10	7	8	6
MAD2L1	Mitotic spindle assembly checkpoint protein MAD2A	Q13257	Q13257	-		+	3.26697	-1.13615	-6.69021	16.5184	16.5387	15.9511	16.5732	16.6043	15.1908	15.4139	15.2983	0.000958988	0.000581054	23510	5	3	3	5	6	5	4	3
OCC1	Overexpressed in colon carcinoma 1 protein	Q8TAD7	Q8TAD7	-		+	1.63982	-1.13398	-3.03608	17.5224	16.6967	16.4521	15.9558	17.2126	15.5199	15.5948	15.7871	0.000212	0.000168	6406.99	2	3	2	2	2	2	2	2
MB21D2	Protein MB21D2	Q8IYB1	Q8IYB1	-		+	2.79129	-1.13365	-5.43032	16.6021	16.6676	16.1151	16.9429	16.6506	15.3898	15.2503	15.7459	0.000742168	0.000471538	55800.2	4	6	5	6	5	2	2	3
SLC4A4	Electrogenic sodium bicarbonate cotransporter 1;Isoform 2 of Electrogenic sodium bicarbonate cotransporter 1;Isoform 4 of Electrogenic sodium bicarbonate cotransporter 1;Isoform 5 of Electrogenic sodium bicarbonate cotransporter 1	Q9Y6R1;Q9Y6R1-2;Q9Y6R1-4;Q9Y6R1-5	Q9Y6R1;Q9Y6R1-2;Q9Y6R1-4;Q9Y6R1-5	-			0.634985	-1.13062	-1.40855	15.5497	14.5068	13.5104	13.2391	NaN	NaN	13.3177	12.824	0.00094469	0.000573728	121460.67;121460.67-2;121460.67-4;121460.67-5	4	1	1	1	NaN	NaN	1	1
RPL22L1	60S ribosomal protein L22-like 1	Q6P5R6	Q6P5R6	-		+	3.87439	-1.1297	-8.62721	17.861	17.5819	17.5929	17.379	17.888	16.4844	16.6162	16.492	0.000216756	0.000171528	14606.5	3	3	3	3	3	3	3	3
EIF4B	Eukaryotic translation initiation factor 4B	P23588	P23588	-		+	4.37483	-1.12718	-10.57	17.5838	17.383	17.3674	17.1121	17.4753	16.244	16.3148	16.2126	0.000105264	9.88e-05	69151.2	13	11	11	11	12	6	8	6
PEAK1	Inactive tyrosine-protein kinase PEAK1	Q9H792	Q9H792	-		+	3.82282	-1.12646	-8.44618	16.0152	16.0786	16.1936	15.8318	15.8802	14.6004	15.0394	14.9805	0.000661623	0.000432457	193106	18	14	20	12	12	3	7	7
LIMCH1	LIM and calponin homology domains-containing protein 1;Isoform 10 of LIM and calponin homology domains-containing protein 1;Isoform 2 of LIM and calponin homology domains-containing protein 1;Isoform 4 of LIM and calponin homology domains-containing protein 1	Q9UPQ0;Q9UPQ0-10;Q9UPQ0-2;Q9UPQ0-4	Q9UPQ0;Q9UPQ0-10;Q9UPQ0-2;Q9UPQ0-4	-			1.11901	-1.12637	-2.14113	15.6429	16.0272	17.6873	15.9666	15.5415	15.1591	15.1603	14.8207	0.000564721	0.000379726	121867.19;121867.19-10;121867.19-2;121867.19-4	4	3	19	5	3	3	3	4
STAT1	Signal transducer and activator of transcription 1-alpha/beta	P42224	P42224	-		+	3.87748	-1.1253	-8.63817	18.2626	18.4983	18.7431	18.2853	18.6705	17.3765	17.3462	17.3772	4.17e-07	3.26e-05	87334.8	29	31	32	30	33	25	29	29
DNAJB12	DnaJ homolog subfamily B member 12	Q9NXW2	Q9NXW2	-		+	3.65786	-1.12103	-7.88896	16.3049	16.1755	15.7534	16.26	16.1701	14.9816	14.8986	15.1549	0.000527	0.000359	41859.8	7	6	5	6	6	4	2	3
IQGAP3	Ras GTPase-activating-like protein IQGAP3	Q86VI3	Q86VI3	-		+	2.47484	-1.11975	-4.69287	16.3122	15.6617	15.5933	15.805	16.3684	14.8786	15.0259	14.5807	0.000213253	0.000169272	184699	28	21	11	14	25	7	6	9
CNBP	Cellular nucleic acid-binding protein;Isoform 2 of Cellular nucleic acid-binding protein	P62633;P62633-2	P62633;P62633-2	-		+	1.65776	-1.11731	-3.06826	16.8824	16.6301	16.525	15.3758	16.7674	15.3573	15.373	15.2262	4.05e-05	5.24e-05	19462.7;19462.7-2	5	5	5	5	5	5	5	5
WIPF1	WAS/WASL-interacting protein family member 1;Isoform 3 of WAS/WASL-interacting protein family member 1	O43516;O43516-3	O43516;O43516-3	-		+	1.76483	-1.11639	-3.50535	17.336	16.264	16.7117	16.3489	16.6007	15.5993	15.4725	NaN	0.000178846	0.000147411	51258.49;51258.49-3	8	8	8	6	8	1	1	NaN
UBE4A	Ubiquitin conjugation factor E4 A;Isoform 2 of Ubiquitin conjugation factor E4 A	Q14139;Q14139-2	Q14139;Q14139-2	-		+	5.65061	-1.1161	-17.497	16.866	16.8242	16.9473	16.7611	16.979	15.8209	15.6638	15.7936	0.000785252	0.000493271	122560.52;122560.52-2	7	7	7	11	5	3	5	1
RPL12	60S ribosomal protein L12	P30050	P30050	-		+	7.09184	-1.1122	-30.5944	20.5104	20.4603	20.5269	20.559	20.5323	19.4003	19.3393	19.477	9.62e-06	3.34e-05	17818.6	6	6	6	6	8	6	6	6
WAPL	Wings apart-like protein homolog;Isoform 2 of Wings apart-like protein homolog;Isoform 3 of Wings apart-like protein homolog	Q7Z5K2;Q7Z5K2-2;Q7Z5K2-3	Q7Z5K2;Q7Z5K2-2;Q7Z5K2-3	-			1.10431	-1.11186	-2.20448	15.472	14.0574	15.3933	15.2486	15.8303	14.0729	14.104	NaN	0.000409057	0.000292005	132945.71;132945.71-2;132945.71-3	1	2	2	1	2	1	2	1
MRPL37	39S ribosomal protein L37, mitochondrial	Q9BZE1	Q9BZE1	+	LSU;Mitochondrial central dogma;Mitochondrial ribosome;Translation	+	5.32512	-1.11123	-15.4049	16.6404	16.6731	16.5019	16.5017	16.6806	15.5323	15.5732	15.3594	0.00114643	0.000674877	48117.5	10	10	10	10	11	5	6	5
ANAPC5	Anaphase-promoting complex subunit 5	Q9UJX4	Q9UJX4	-			0.967015	-1.10837	-1.95562	15.1361	16.2926	14.3948	14.6864	15.6013	NaN	14.0004	14.2273	0.0025931	0.0012671	85076.9	1	1	1	2	4	NaN	1	1
ENPEP	Glutamyl aminopeptidase	Q07075	Q07075	-		+	1.93318	-1.10698	-3.57856	20.5716	21.6334	20.4749	20.491	20.3981	19.6429	19.6229	19.5547	0.0106407	0.00444949	109244	1	1	1	1	1	2	2	2
NACC1	Nucleus accumbens-associated protein 1	Q96RE7	Q96RE7	-		+	2.26806	-1.10246	-4.68808	16.5235	15.8824	15.8058	15.9572	16.3044	14.893	15.0913	NaN	0.00289219	0.00133503	57258.2	4	2	1	2	2	1	1	NaN
FAM207A	Protein FAM207A;Isoform B of Protein FAM207A	Q9NSI2;Q9NSI2-2	Q9NSI2;Q9NSI2-2	-		+	1.7378	-1.09859	-3.44737	16.6349	17.2679	16.419	16.2195	16.2749	NaN	15.493	15.4363	0.00104447	0.000624598	25456.25;25456.25-2	1	1	1	2	1	NaN	2	1
SH2D4A	SH2 domain-containing protein 4A	Q9H788	Q9H788	-		+	3.45243	-1.09455	-7.23871	16.24	16.2301	16.7286	16.0978	16.4837	15.2635	15.2051	15.3159	0.000132	0.000116	52727	12	13	17	9	13	7	7	9
SLC9A7	Sodium/hydrogen exchanger 7	Q96T83	Q96T83	-		+	2.37044	-1.09327	-4.4647	16.3869	16.5526	15.9726	16.1679	16.0391	14.59	15.3762	15.4254	0.00219	0.00114	80131	2	3	3	2	2	2	2	1
SMYD3	Histone-lysine N-methyltransferase SMYD3;Isoform 2 of Histone-lysine N-methyltransferase SMYD3;Isoform 3 of Histone-lysine N-methyltransferase SMYD3	Q9H7B4;Q9H7B4-2;Q9H7B4-3	Q9H7B4;Q9H7B4-2;Q9H7B4-3	-		+	3.07831	-1.09287	-6.16663	15.6618	15.738	15.0456	15.4885	15.6491	14.2622	14.4602	14.5489	0.00199715	0.00106599	49097.14;49097.14-2;49097.14-3	1	2	1	3	1	2	2	2
MOCS3	Adenylyltransferase and sulfurtransferase MOCS3	O95396	O95396	-		+	2.72466	-1.09241	-5.26893	16.0338	16.402	16.5731	16.3523	16.2403	14.9803	15.0114	15.6919	0.00253	0.00125	49669.3	2	3	3	3	4	2	2	1
ZYX	Zyxin	Q15942	Q15942	-		+	2.25434	-1.08991	-4.219	19.3903	19.013	18.9228	18.2436	19.1134	17.9817	17.7869	17.7715	8.94e-06	3.33e-05	61277.3	24	23	23	16	21	12	12	13
MRPL24	39S ribosomal protein L24, mitochondrial	Q96A35	Q96A35	+	LSU;Mitochondrial central dogma;Mitochondrial ribosome;Translation	+	3.5728	-1.08927	-7.61403	17.3922	17.3064	17.2729	17.1084	17.3676	16.4686	15.876	16.256	0.00190076	0.00102436	24914.8	5	5	3	4	4	1	2	2
PPP1R21	Protein phosphatase 1 regulatory subunit 21	Q6ZMI0	Q6ZMI0	-		+	4.18698	-1.08765	-9.79915	16.0592	16.245	16.2305	16.1774	16.322	14.8917	15.1257	15.3401	0.000205	0.000164	88314.5	9	10	7	7	8	3	2	3
RNF126	E3 ubiquitin-protein ligase RNF126	Q9BV68	Q9BV68	-		+	2.55351	-1.08721	-4.86954	16.1087	16.137	16.2047	15.6376	16.2295	14.693	15.4374	14.7985	0.00255	0.00125	33861.5	2	2	2	2	1	1	2	2
CALHM5	Calcium homeostasis modulator protein 5	Q8N5C1	Q8N5C1	-		+	1.33636	-1.08366	-2.50695	13.9062	15.1294	15.6855	15.1688	14.6357	14.0545	14.0375	13.3722	0.00275	0.00131	35169.9	1	2	3	2	2	1	1	2
TERF2IP	Telomeric repeat-binding factor 2-interacting protein 1	Q9NYB0	Q9NYB0	-		+	3.7999	-1.07968	-8.3668	15.9527	15.6542	15.4176	15.6508	15.7793	14.4836	14.7417	14.6085	1.52e-05	3.47e-05	44260	4	1	2	2	5	3	2	2
RANBP9	Ran-binding protein 9	Q96S59	Q96S59	-		+	4.78483	-1.0784	-12.449	16.2517	16.153	16.3088	16.0823	15.9644	15.0642	15.0088	15.148	0.000617	0.000407	77847.3	5	6	5	7	5	4	6	5
UBAC1	Ubiquitin-associated domain-containing protein 1	Q9BSL1	Q9BSL1	-		+	2.52102	-1.07809	-5.37076	15.9928	15.8616	15.8844	15.6271	16.3579	14.9078	14.8255	NaN	0.00291	0.00134	45338.4	2	3	4	1	2	1	2	NaN
PRKAB1	5'-AMP-activated protein kinase subunit beta-1	Q9Y478	Q9Y478	-		+	2.74269	-1.07711	-5.31229	15.9517	16.3482	16.559	16.5709	16.3585	15.0054	15.6395	15.1967	0.000714	0.000458	30382.3	1	4	4	3	4	2	1	2
POP4	Ribonuclease P protein subunit p29	O95707	O95707	-			0.815997	-1.07331	-1.76257	14.7598	16.3684	14.6837	NaN	14.887	13.9329	14.27	NaN	0.011	0.00458	25424.7	1	2	1	NaN	1	1	1	NaN
MARCKS	Myristoylated alanine-rich C-kinase substrate	P29966	P29966	-		+	1.55355	-1.0698	-2.88282	18.4031	17.261	17.7775	16.735	17.6362	16.5068	16.3988	16.5726	1.9e-05	3.68e-05	31554.7	9	8	9	7	9	8	7	7
FHL1	Isoform 1 of Four and a half LIM domains protein 1;Isoform 4 of Four and a half LIM domains protein 1;Isoform 5 of Four and a half LIM domains protein 1	Q13642-1;Q13642-4;Q13642-5	Q13642-1;Q13642-4;Q13642-5	-			1.21635	-1.06798	-2.30402	17.9406	19.5089	19.2146	18.3635	19.7658	17.8351	17.9519	17.8852	7.26e-06	3.31e-05	31894.75;33578.61;34997.41	3	3	3	3	3	3	3	3
MRPL34	39S ribosomal protein L34, mitochondrial	Q9BQ48	Q9BQ48	+	LSU;Mitochondrial central dogma;Mitochondrial ribosome;Translation	+	1.93506	-1.06722	-3.88247	16.9232	17.432	16.8039	16.607	16.5625	15.6356	NaN	15.9614	0.00276	0.00131	10164.9	2	1	1	2	1	1	NaN	1
FIG4	Polyphosphoinositide phosphatase	Q92562	Q92562	-			0.697174	-1.06692	-1.63371	NaN	17.1163	NaN	15.5605	NaN	14.8212	15.394	15.5992	0.0153	0.00628	103635	NaN	1	NaN	1	NaN	1	2	2
DPF2	Zinc finger protein ubi-d4	Q92785	Q92785	-		+	2.33368	-1.0667	-4.85883	16.7473	16.1787	16.4841	16.7244	16.9416	NaN	15.5663	15.5307	0.00284	0.00133	44155.5	2	4	3	1	2	NaN	1	2
CALU	Isoform 2 of Calumenin;Isoform 4 of Calumenin	O43852-2;O43852-4	O43852-2;O43852-4	-		+	2.57889	-1.0639	-4.92743	17.3009	17.2675	18.0986	17.6799	17.8508	16.638	16.6098	16.4791	1.83e-05	3.65e-05	37134.73;38078.89	4	4	4	4	4	4	4	4
ZFP36L1	mRNA decay activator protein ZFP36L1	Q07352	Q07352	-			1.21342	-1.06349	-2.58235	16.0974	15.6304	16.9117	NaN	16.3728	NaN	15.3387	15.0405	0.0012	0.000699	36313.6	2	2	3	NaN	2	NaN	1	1
P3H2	Prolyl 3-hydroxylase 2	Q8IVL5	Q8IVL5	-			0.471934	-1.0599	-1.08908	15.9897	NaN	14.3921	15.4783	17.5121	NaN	14.8371	14.7292	0.00266	0.00129	80984.5	5	NaN	2	3	1	NaN	1	2
HIBADH	3-hydroxyisobutyrate dehydrogenase, mitochondrial	P31937	P31937	+	Amino acid metabolism;Branched-chain amino acid metabolism;Metabolism	+	7.60669	-1.05963	-37.312	17.5758	17.6643	17.6129	17.5786	17.5733	16.5491	16.4992	16.5757	1.95e-05	3.74e-05	35328.9	10	10	10	10	10	10	9	10
TJAP1	Tight junction-associated protein 1;Isoform 2 of Tight junction-associated protein 1	Q5JTD0;Q5JTD0-2	Q5JTD0;Q5JTD0-2	-		+	2.39859	-1.05922	-4.52555	16.1102	16.142	16.055	15.6964	15.9678	15.4899	14.7721	14.5432	0.00199	0.00106	61821.24;61821.24-2	5	5	2	4	6	2	2	3
MAP1B	Microtubule-associated protein 1B	P46821	P46821	-		+	2.72308	-1.05915	-5.26516	18.3914	17.9052	18.0374	17.5752	18.3434	16.9553	17.0545	16.9643	1.91e-06	3.26e-05	270634	78	76	77	68	81	48	48	49
SENP3	Sentrin-specific protease 3	Q9H4L4	Q9H4L4	-		+	2.24513	-1.05883	-4.19983	17.1446	16.7674	16.7925	16.0969	17.0059	15.8497	15.7584	15.4999	0.000407691	0.000291208	65009.8	4	3	4	4	3	5	5	5
VAMP4	Vesicle-associated membrane protein 4;Isoform 2 of Vesicle-associated membrane protein 4	O75379;O75379-2	O75379;O75379-2	-		+	2.00364	-1.05851	-4.04064	15.3633	14.6186	15.1044	15.3087	15.287	NaN	13.8358	14.32	0.00112	0.000665	16396.81;16396.81-2	1	2	1	2	1	NaN	1	1
SYNPO2	Synaptopodin-2;Isoform 5 of Synaptopodin-2	Q9UMS6;Q9UMS6-5	Q9UMS6;Q9UMS6-5	-		+	1.55322	-1.05734	-2.88225	15.4009	16.9463	16.501	15.7624	16.3497	15.0918	15.0807	15.2317	0.000235647	0.000183621	117514.06;117514.06-5	4	7	7	4	8	5	4	7
GPR108	Protein GPR108	Q9NPR9	Q9NPR9	-			0.386131	-1.0562	-1.03067	NaN	16.1567	NaN	NaN	18.2061	NaN	16.1401	16.1103	0.00292	0.00134	60632.6	NaN	1	NaN	NaN	1	NaN	1	1
STX18	Syntaxin-18	Q9P2W9	Q9P2W9	-		+	4.42918	-1.04699	-10.8031	16.0963	16.0844	16.3256	16.1448	16.1049	15.2426	14.8992	15.1708	0.000759	0.00048	38673.5	10	7	7	8	6	2	2	4
SELENOM	Selenoprotein M	Q8WWX9	Q8WWX9	-			1.21843	-1.04239	-2.30751	15.2383	15.3054	16.8656	16.3134	15.7325	14.4036	14.8757	15.2666	7.85e-05	8.05e-05	16231.6	1	1	1	1	1	2	1	1
TMA7	Translation machinery-associated protein 7	Q9Y2S6	Q9Y2S6	-		+	2.97951	-1.04191	-6.79851	16.7616	16.3014	16.6252	16.3758	16.7075	15.5274	NaN	15.4974	0.000101926	9.66e-05	7066.29	2	2	2	2	2	1	NaN	1
ARFIP2	Arfaptin-2;Isoform 3 of Arfaptin-2	P53365;P53365-3	P53365;P53365-3	-		+	4.0717	-1.03996	-9.35151	15.9951	16.3813	16.3264	16.3237	16.0577	15.2066	15.2422	15.0818	0.000938776	0.000570581	37855.73;37855.73-3	5	5	5	5	4	3	3	4
EPG5	Ectopic P granules protein 5 homolog	Q9HCE0	Q9HCE0	-		+	4.23246	-1.03983	-9.98098	16.6362	16.3985	16.1671	16.3047	16.3211	15.326	15.2888	15.3623	3.91e-05	5.13e-05	292481	32	27	23	29	26	14	14	18
FN3K	Fructosamine-3-kinase	Q9H479	Q9H479	-			1.10462	-1.03741	-2.20506	15.2257	16.1318	15.3603	14.3755	15.1838	NaN	14.3223	14.1137	0.0037872	0.00165029	35171.2	1	1	1	1	1	NaN	2	2
RNF25	E3 ubiquitin-protein ligase RNF25	Q96BH1	Q96BH1	-		+	3.30172	-1.03612	-6.79033	16.0489	16.1107	15.7238	15.8026	16.0598	14.8174	15.2135	14.7082	0.00234306	0.00118815	51218.7	3	4	4	4	4	2	1	2
CIT	Citron Rho-interacting kinase	O14578	O14578	-		+	1.60091	-1.03553	-3.49249	15.3895	14.7896	NaN	15.6572	15.5618	14.2301	NaN	14.3979	0.0159343	0.00651859	231431	3	4	NaN	3	4	1	NaN	2
STBD1	Starch-binding domain-containing protein 1	O95210	O95210	-		+	1.49962	-1.0352	-2.78825	17.3109	16.6963	16.5935	16.4963	16.8896	15.3512	16.632	15.3032	6.56e-05	7.06e-05	39007.3	6	4	5	4	7	2	1	2
SMTN	Isoform B2 of Smoothelin;Isoform B3 of Smoothelin	P53814-5;P53814-6	P53814-5;P53814-6	-		+	1.46537	-1.03413	-2.72864	17.3395	16.6943	16.187	15.8904	17.1427	15.4758	15.494	15.8802	1.68e-05	3.57e-05	101809.74;98919.29	12	11	7	4	11	4	4	4
H2AZ1;H2AZ2	Histone H2A.Z;Histone H2A.V	P0C0S5;Q71UI9	P0C0S5;Q71UI9	-		+	5.47038	-1.03141	-16.307	20.2491	20.1669	20.1119	20.0247	20.2753	19.1077	19.114	19.1808	2.64e-05	4.29e-05	13508.68;13552.73	2	2	2	2	2	2	2	2
RTCB	RNA-splicing ligase RtcB homolog	Q9Y3I0	Q9Y3I0	-		+	5.4143	-1.03054	-15.9529	17.8928	18.0998	18.1156	18.0973	18.0399	16.925	17.0682	17.0624	7.13e-06	3.31e-05	55210.3	22	22	22	22	21	19	21	21
AP5Z1	AP-5 complex subunit zeta-1	O43299	O43299	-		+	1.61402	-1.02794	-2.98998	15.8581	15.703	15.5852	15.3564	15.515	14.9558	15.0815	13.6895	0.000621	0.000409	88605.2	3	6	3	1	5	3	3	2
COMMD4	COMM domain-containing protein 4	Q9H0A8	Q9H0A8	-		+	5.39471	-1.02527	-15.8309	16.777	16.7184	16.6759	16.5362	16.7464	15.6447	15.7505	15.6014	5.24e-05	6.08e-05	21764.3	7	7	7	7	7	3	2	2
F3	Tissue factor	P13726	P13726	-		+	1.93391	-1.02504	-3.57995	15.5948	16.3898	16.2153	16.9227	16.4287	15.273	15.3451	15.2377	0.000779	0.00049	33067.5	2	4	2	4	4	2	2	2
NAA10	N-alpha-acetyltransferase 10	P41227	P41227	-		+	4.61548	-1.02332	-11.6383	17.0925	16.9595	16.7467	16.8554	16.9556	15.828	16.0136	15.8543	0.000135	0.000118	26458.5	12	12	9	8	11	4	5	6
GLS	Glutaminase kidney isoform, mitochondrial	O94925	O94925	+	Amino acid metabolism;Glutamate metabolism;Metabolism	+	3.13857	-1.01945	-6.33027	17.9793	17.643	18.2929	18.2704	17.9194	17.0227	16.997	16.985	1.89e-05	3.68e-05	73461.1	25	24	27	25	25	22	24	24
MRPL4	39S ribosomal protein L4, mitochondrial	Q9BYD3	Q9BYD3	+	LSU;Mitochondrial central dogma;Mitochondrial ribosome;Translation	+	3.44783	-1.01825	-7.22471	16.9941	17.0686	16.9892	16.9256	17.0828	16.3637	15.7792	15.8386	3.72e-05	5.02e-05	34919.2	7	7	6	7	7	1	4	2
CDC42EP3	Cdc42 effector protein 3	Q9UKI2	Q9UKI2	-		+	2.55245	-1.01634	-4.86713	17.5652	17.5608	17.9074	17.0046	17.6696	16.4494	16.4174	16.7087	0.000115	0.000105	27678.1	6	6	6	6	6	6	6	5
ATE1	Isoform ATE1-2 of Arginyl-tRNA--protein transferase 1	O95260-2	O95260-2	-		+	3.67322	-1.01632	-7.93946	16.4602	16.7986	16.8924	16.9131	16.7631	15.6875	15.9323	15.6277	0.00093	0.000567	59032	2	3	3	3	2	2	2	2
ITM2C	Integral membrane protein 2C;Isoform 2 of Integral membrane protein 2C;Isoform 3 of Integral membrane protein 2C	Q9NQX7;Q9NQX7-2;Q9NQX7-3	Q9NQX7;Q9NQX7-2;Q9NQX7-3	-		+	1.91474	-1.01406	-3.83631	17.1559	17.0792	NaN	16.6617	16.933	16.4937	15.634	15.7025	0.000132	0.000116	30223.78;30223.78-2;30223.78-3	3	3	NaN	2	3	1	2	2
RTF2	Replication termination factor 2	Q9BY42	Q9BY42	-		+	2.41737	-1.01096	-4.5664	15.6799	15.3568	15.397	15.0566	15.6835	14.5708	14.7014	13.9992	0.000740759	0.000471	33886.7	4	5	2	4	6	4	3	5
PCNP	PEST proteolytic signal-containing nuclear protein	Q8WW12	Q8WW12	-		+	1.67653	-1.01069	-3.31773	17.4033	16.4539	16.2598	NaN	16.8745	15.8651	15.6553	15.6911	2.93e-05	4.49e-05	18924.9	5	5	4	NaN	5	1	3	3
MGLL	Monoglyceride lipase	Q99685	Q99685	-		+	2.30082	-1.0098	-4.31637	18.0657	17.4042	16.9868	17.419	17.4294	16.3527	16.5487	16.4523	3.92e-06	3.26e-05	33261.4	7	5	6	7	6	3	4	4
FBXO44	F-box only protein 44;Isoform 2 of F-box only protein 44	Q9H4M3;Q9H4M3-2	Q9H4M3;Q9H4M3-2	-		+	2.02725	-1.00804	-3.7606	13.7742	14.7536	13.7654	13.8256	14.3241	12.9222	13.1768	13.1426	0.00226	0.00116	29746.75;29746.75-2	2	2	1	1	1	1	1	1
SYNE3	Nesprin-3;Isoform 2 of Nesprin-3	Q6ZMZ3;Q6ZMZ3-2	Q6ZMZ3;Q6ZMZ3-2	-		+	4.09173	-1.00714	-9.42797	16.6873	16.7558	16.5214	16.5074	16.2996	15.5137	15.5751	15.5527	1.79e-05	3.64e-05	112216.48;112216.48-2	14	15	14	13	12	7	11	9
TBCB	Tubulin-folding cofactor B	Q99426	Q99426	-		+	3.98454	-1.00376	-9.0252	19.4036	19.381	18.9899	19.213	19.3355	18.1389	18.3011	18.3425	6.42e-06	3.31e-05	27325.5	8	7	7	7	7	8	7	7
PYM1	Partner of Y14 and mago;Isoform 2 of Partner of Y14 and mago	Q9BRP8;Q9BRP8-2	Q9BRP8;Q9BRP8-2	-		+	4.41539	-1.00079	-10.7435	16.4562	16.5114	16.6267	16.5066	16.8445	15.5703	15.5984	15.5962	1.4e-06	3.26e-05	22655.55;22655.55-2	7	6	6	6	7	3	3	3
PEX5	Peroxisomal targeting signal 1 receptor;Isoform 2 of Peroxisomal targeting signal 1 receptor;Isoform 3 of Peroxisomal targeting signal 1 receptor;Isoform 4 of Peroxisomal targeting signal 1 receptor	P50542;P50542-2;P50542-3;P50542-4	P50542;P50542-2;P50542-3;P50542-4	-		+	1.42978	-0.99895	-2.81855	16.4592	15.268	16.3522	15.843	15.9156	NaN	14.9669	14.9704	0.00247	0.00124	70864.76;70864.76-2;70864.76-3;70864.76-4	6	4	4	2	2	NaN	1	2
LIMA1	Isoform 4 of LIM domain and actin-binding protein 1	Q9UHB6-4	Q9UHB6-4	-		+	2.1501	-0.998453	-4.00509	17.6076	18.0163	17.9197	16.9924	17.8953	16.6717	16.6507	16.741	1.44e-05	3.47e-05	85223.5	31	34	33	29	35	24	26	25
NRAS	GTPase NRas	P01111	P01111	-		+	5.54815	-0.997977	-16.8106	17.835	17.9284	18.0065	17.8466	17.7556	16.8789	16.8377	16.9128	3.99e-05	5.2e-05	21229.2	7	7	7	7	7	7	7	7
TRMT1	tRNA (guanine(26)-N(2))-dimethyltransferase;Isoform 2 of tRNA (guanine(26)-N(2))-dimethyltransferase	Q9NXH9;Q9NXH9-2	Q9NXH9;Q9NXH9-2	+	Mitochondrial central dogma;mtRNA metabolism;mt-tRNA modifications	+	3.89272	-0.997734	-8.69237	16.7941	16.5398	16.5138	16.6623	16.5251	15.7368	15.727	15.3641	1.07e-05	3.35e-05	72234.05;72234.05-2	6	3	2	3	5	3	3	3
MRPL17	39S ribosomal protein L17, mitochondrial	Q9NRX2	Q9NRX2	+	LSU;Mitochondrial central dogma;Mitochondrial ribosome;Translation	+	4.98426	-0.9974	-13.4714	16.7586	16.7996	16.647	16.6181	16.7149	15.5625	15.8394	15.7288	0.00127	0.000732	20050.2	7	5	6	6	5	2	3	3
LUM	Lumican	P51884	P51884	-			1.06861	-0.994691	-2.13936	NaN	17.0629	17.1145	18.7454	17.7714	16.751	16.618	16.6675	4.3e-05	5.45e-05	38429	NaN	6	6	8	6	5	7	6
NUP50	Nuclear pore complex protein Nup50;Isoform 2 of Nuclear pore complex protein Nup50	Q9UKX7;Q9UKX7-2	Q9UKX7;Q9UKX7-2	-		+	2.84884	-0.993973	-5.5725	16.3657	15.9373	15.8747	15.6708	16.2346	14.8618	15.1461	15.0601	9.06e-05	8.92e-05	50144.16;50144.16-2	9	7	4	3	7	3	3	3
PCMT1	Protein-L-isoaspartate(D-aspartate) O-methyltransferase;Isoform 2 of Protein-L-isoaspartate(D-aspartate) O-methyltransferase	P22061;P22061-2	P22061;P22061-2	-		+	4.5092	-0.991988	-11.1549	19.0529	18.7656	18.8841	18.667	18.7761	17.8798	17.8188	17.8128	6.7e-06	3.31e-05	24636.37;24636.37-2	14	15	13	13	14	12	13	10
FGF2	Isoform 3 of Fibroblast growth factor 2	P09038-2	P09038-2	-		+	2.82031	-0.990574	-5.50169	18.3532	18.2363	18.9221	18.8208	18.4448	17.591	17.5956	17.508	1.91e-05	3.68e-05	17253.8	7	7	7	7	7	6	6	6
CASTOR2	Cytosolic arginine sensor for mTORC1 subunit 2	A6NHX0	A6NHX0	-		+	2.78474	-0.989197	-5.41432	16.1566	16.1885	15.6832	15.541	16.0278	14.7946	15.0636	14.9325	0.00219	0.00114	36056.4	5	5	4	6	4	3	4	4
TPRKB	EKC/KEOPS complex subunit TPRKB;Isoform 3 of EKC/KEOPS complex subunit TPRKB	Q9Y3C4;Q9Y3C4-3	Q9Y3C4;Q9Y3C4-3	-		+	2.99132	-0.984372	-5.9361	15.5843	15.9609	15.8465	15.9784	15.4831	14.9056	14.5198	14.9335	0.000314415	0.000235	19660.93;19660.93-3	2	2	2	2	1	1	1	1
MICAL1	[F-actin]-monooxygenase MICAL1;Isoform 4 of [F-actin]-monooxygenase MICAL1	Q8TDZ2;Q8TDZ2-4	Q8TDZ2;Q8TDZ2-4	-		+	3.86587	-0.98003	-8.59708	17.6682	17.5385	17.4262	17.1813	17.58	16.4664	16.4722	16.5579	1.07e-05	3.35e-05	117874.76;117874.76-4	22	23	21	20	22	13	18	17
BARGIN	Bargin;Isoform Short BGIN of Bargin	Q6ZT62;Q6ZT62-2	Q6ZT62;Q6ZT62-2				0.687099	-0.979901	-1.45457	13.8198	15.5461	13.9351	13.6952	13.1484	NaN	13.0647	13.0333	0.0154	0.00632	73599.47;73599.47-2	1	1	1	1	1	NaN	2	1
FYCO1	FYVE and coiled-coil domain-containing protein 1;Isoform 4 of FYVE and coiled-coil domain-containing protein 1	Q9BQS8;Q9BQS8-4	Q9BQS8;Q9BQS8-4	-		+	4.90037	-0.974783	-13.032	16.5388	16.4885	16.2928	16.3618	16.3439	15.3184	15.4634	15.5093	0.000230474	0.000180431	166982.63;166982.63-4	22	18	18	17	18	10	10	11
COG1	Conserved oligomeric Golgi complex subunit 1	Q8WTW3	Q8WTW3	-		+	1.87311	-0.972987	-3.46451	15.7316	16.3494	16.3782	16.0354	15.8215	15.108	15.5993	14.5634	9.67e-05	9.33e-05	108978	5	7	7	6	4	3	5	5
FNBP1	Isoform 2 of Formin-binding protein 1;Isoform 5 of Formin-binding protein 1	Q96RU3-2;Q96RU3-5	Q96RU3-2;Q96RU3-5	-		+	4.30132	-0.971743	-10.2621	16.1328	16.1079	15.9189	15.8511	16.0157	15.056	14.8775	15.1672	0.00191207	0.00102919	70752.07;71183.65	10	9	6	6	8	4	2	3
HEBP2	Heme-binding protein 2	Q9Y5Z4	Q9Y5Z4	-		+	4.30334	-0.971228	-10.2704	18.3891	18.529	18.5986	18.6175	18.2559	17.44	17.5347	17.5457	8.65e-06	3.33e-05	22875.4	7	7	7	7	7	6	7	7
COPS7A	COP9 signalosome complex subunit 7a	Q9UBW8	Q9UBW8	-		+	4.35079	-0.971143	-10.4684	16.937	16.8533	16.9268	16.5572	16.799	15.8555	15.8148	15.8602	6.07e-05	6.75e-05	30276.6	10	12	12	12	13	6	8	9
DHRS7B	Dehydrogenase/reductase SDR family member 7B	Q6IAN0	Q6IAN0	+	0	+	2.16606	-0.971049	-4.03744	15.4633	15.7632	16.1405	16.3008	15.8528	14.748	14.7347	15.3165	0.00111404	0.000660183	35119	4	4	6	2	7	2	3	3
INPP4A	Inositol polyphosphate-4-phosphatase type I A;Isoform 2 of Inositol polyphosphate-4-phosphatase type I A;Isoform 3 of Inositol polyphosphate-4-phosphatase type I A;Isoform 4 of Inositol polyphosphate-4-phosphatase type I A	Q96PE3;Q96PE3-2;Q96PE3-3;Q96PE3-4	Q96PE3;Q96PE3-2;Q96PE3-3;Q96PE3-4	-		+	3.07966	-0.966522	-6.17024	15.7769	16.3029	15.6764	15.6857	15.8365	14.8145	14.9309	14.9221	0.001953	0.00104721	109955.71;109955.71-2;109955.71-3;109955.71-4	2	2	1	2	2	2	2	3
PPME1	Protein phosphatase methylesterase 1;Isoform 4 of Protein phosphatase methylesterase 1	Q9Y570;Q9Y570-4	Q9Y570;Q9Y570-4	-		+	3.94728	-0.964516	-8.88882	17.1917	17.2792	17.6269	17.2995	17.5126	16.383	16.4292	16.4402	2.44e-05	4.16e-05	42315.42;42315.42-4	11	11	10	10	11	9	10	9
RABL6	Rab-like protein 6	Q3YEC7	Q3YEC7	-		+	4.22712	-0.963787	-9.9595	16.9482	17.0481	16.9787	16.8041	16.8828	15.8921	16.1827	15.8309	4.22e-05	5.39e-05	79548.8	6	7	6	4	8	3	4	4
MOXD1	DBH-like monooxygenase protein 1	Q6UVY6	Q6UVY6	-		+	2.81833	-0.963633	-5.4968	17.8572	18.1133	17.7264	17.362	18.0165	16.8365	16.8811	16.8366	2.45e-05	4.17e-05	69652.5	11	11	10	9	11	6	6	5
UAP1	UDP-N-acetylhexosamine pyrophosphorylase;Isoform 3 of UDP-N-acetylhexosamine pyrophosphorylase	Q16222;Q16222-3	Q16222;Q16222-3	-		+	2.27982	-0.953625	-4.27223	18.3182	17.7392	17.2828	17.7832	17.9365	16.8484	16.8284	16.8982	2.19e-05	3.96e-05	58769.03;58769.03-3	21	19	19	19	19	14	15	16
TK2	Thymidine kinase 2, mitochondrial;Isoform 2 of Thymidine kinase 2, mitochondrial;Isoform 3 of Thymidine kinase 2, mitochondrial;Isoform 4 of Thymidine kinase 2, mitochondrial;Isoform 5 of Thymidine kinase 2, mitochondrial;Isoform 6 of Thymidine kinase 2, mitochondrial	O00142;O00142-2;O00142-3;O00142-4;O00142-5;O00142-6	O00142;O00142-2;O00142-3;O00142-4;O00142-5;O00142-6	+	Metabolism;Nucleotide metabolism;Nucleotide synthesis and processing	+	2.74834	-0.95035	-5.32591	17.2432	17.278	17.5142	17.4799	17.3319	16.4925	16.0008	16.764	0.00229	0.00117	31004.77;31004.77-2;31004.77-3;31004.77-4;31004.77-5;31004.77-6	3	3	3	3	2	1	2	1
LHPP	Phospholysine phosphohistidine inorganic pyrophosphate phosphatase	Q9H008	Q9H008	-		+	2.97299	-0.949238	-5.88837	16.946	16.9884	17.1395	17.3408	16.7247	16.2674	15.8652	16.1032	0.00286097	0.00133027	29165.3	2	2	3	3	1	4	3	4
METTL26	Methyltransferase-like 26	Q96S19	Q96S19	-		+	2.41026	-0.944986	-4.5509	16.5208	17.1468	16.7052	16.6199	16.5008	15.4776	15.6762	16.1073	0.00031	0.000232	22578.1	3	5	4	3	4	1	2	1
SLC25A4	ADP/ATP translocase 1	P12235	P12235	+	Calcium homeostasis;Metabolism;Mitochondrial permeability transition pore;Nucleotide import;Nucleotide metabolism;Signaling;SLC25A family;Small molecule transport	+	3.07485	-0.940092	-6.15733	18.3806	18.0267	17.744	17.8647	18.2024	17.1127	17.124	17.074	9.63e-05	9.3e-05	33064.5	3	3	3	3	3	2	2	2
CDH11	Cadherin-11	P55287	P55287	-		+	4.52243	-0.939457	-11.214	16.445	16.4963	16.4399	16.3404	16.147	15.4066	15.4682	15.428	0.00156269	0.000870641	87965.3	2	1	2	2	4	1	1	1
NDUFAF2	NADH dehydrogenase [ubiquinone] 1 alpha subcomplex assembly factor 2	Q8N183	Q8N183	+	CI assembly factors;Complex I;OXPHOS;OXPHOS assembly factors	+	5.72919	-0.936932	-18.0417	17.1528	17.233	17.2451	17.1875	17.1406	16.3725	16.2169	16.1751	0.000238978	0.000185476	19856.3	5	5	4	4	4	4	4	4
RWDD4	RWD domain-containing protein 4	Q6NW29	Q6NW29	-		+	5.46839	-0.934571	-16.2943	17.0586	17.1922	17.103	16.9626	17.0124	16.0698	16.1766	16.1472	0.000314509	0.000234603	21250.7	4	4	4	3	4	3	2	3
AKR1A1	Aldo-keto reductase family 1 member A1	P14550	P14550	-		+	2.81084	-0.932827	-5.47834	17.7279	18.0466	18.1287	18.4296	17.7804	17.0841	17.0531	17.1322	1e-05	3.35e-05	36573	14	14	15	15	12	14	14	14
MTX3	Metaxin-3;Isoform 3 of Metaxin-3	Q5HYI7;Q5HYI7-4	Q5HYI7;Q5HYI7-4	+	Intramitochondrial membrane interactions;Mitochondrial dynamics and surveillance	+	2.29464	-0.931368	-4.75673	NaN	15.1831	15.9201	15.6221	15.3985	14.5645	14.7365	14.4978	0.00274389	0.00130981	35093.38;35093.38-4	NaN	4	5	3	4	2	1	1
NAA35	N-alpha-acetyltransferase 35, NatC auxiliary subunit	Q5VZE5	Q5VZE5	-		+	3.308	-0.930743	-8.003	15.9165	15.711	16.0232	15.8981	15.9107	NaN	15.1122	14.81	0.00227656	0.00116926	83639	2	3	4	4	4	NaN	3	4
NAXD	ATP-dependent (S)-NAD(P)H-hydrate dehydratase;Isoform 4 of ATP-dependent (S)-NAD(P)H-hydrate dehydratase	Q8IW45;Q8IW45-4	Q8IW45;Q8IW45-4	+	Metabolism;Metals and cofactors;NAD biosynthesis and metabolism	+	1.62539	-0.925852	-3.21138	17.3002	16.9391	16.9083	16.5988	16.3301	16.0512	NaN	15.7277	0.003	0.00135	36576;36576-4	1	3	4	1	5	1	NaN	2
CAMK1	Calcium/calmodulin-dependent protein kinase type 1	Q14012	Q14012	-		+	4.00289	-0.923835	-9.09307	16.1424	16.166	16.0404	16.0389	15.8977	15.1514	14.9365	15.3119	0.000180926	0.000149	41337.1	6	6	6	6	7	5	4	5
ATG2A	Autophagy-related protein 2 homolog A;Isoform 2 of Autophagy-related protein 2 homolog A	Q2TAZ0;Q2TAZ0-3	Q2TAZ0;Q2TAZ0-3	-			0.7367	-0.922871	-1.5435	15.8377	14.2801	15.8162	15.139	14.2906	13.8572	NaN	14.4425	0.00210637	0.00111036	212860.1;212860.1-3	2	2	2	1	3	2	NaN	1
MRPL47	39S ribosomal protein L47, mitochondrial;Isoform 2 of 39S ribosomal protein L47, mitochondrial	Q9HD33;Q9HD33-2	Q9HD33;Q9HD33-2	+	LSU;Mitochondrial central dogma;Mitochondrial ribosome;mtRNA granules;mtRNA metabolism;Translation	+	3.1707	-0.921436	-6.41888	16.702	17.0184	16.7487	16.9027	16.9067	15.7631	15.7734	16.2663	0.000729	0.000465	29450.4;29450.4-2	5	4	6	2	4	1	1	1
EHBP1	EH domain-binding protein 1;Isoform 2 of EH domain-binding protein 1;Isoform 3 of EH domain-binding protein 1	Q8NDI1;Q8NDI1-2;Q8NDI1-3	Q8NDI1;Q8NDI1-2;Q8NDI1-3	-		+	2.64292	-0.921146	-5.07554	15.7095	16.1274	15.8401	15.3141	15.7134	14.6915	14.9211	14.8467	5.52e-05	6.32e-05	140017.29;140017.29-2;140017.29-3	15	12	17	11	16	5	6	7
SYNC	Isoform 2 of Syncoilin	Q9H7C4-2	Q9H7C4-2	-		+	3.41852	-0.919969	-7.1358	17.3175	17.1994	17.1122	16.8001	17.1494	16.1175	16.356	16.1138	4.34e-05	5.48e-05	54947.1	16	14	15	12	15	8	10	10
CDK16	Cyclin-dependent kinase 16;Isoform 2 of Cyclin-dependent kinase 16;Isoform 3 of Cyclin-dependent kinase 16	Q00536;Q00536-2;Q00536-3	Q00536;Q00536-2;Q00536-3	-			0.993462	-0.919916	-1.93232	17.3829	15.7017	16.8934	16.621	16.8736	15.0704	15.7598	16.4936	0.00286604	0.00133051	55715.69;55715.69-2;55715.69-3	1	2	3	1	4	2	2	3
NUDT19	Nucleoside diphosphate-linked moiety X motif 19	A8MXV4	A8MXV4	+	Coenzyme A metabolism;Metabolism;Metals and cofactors		1.26517	-0.915639	-2.38624	15.8646	16.8935	16.9952	17.007	15.7939	15.6826	15.7591	15.3439	6.52e-05	7.04e-05	42233.3	2	3	4	4	2	2	2	2
NOP16	Nucleolar protein 16	Q9Y3C1	Q9Y3C1	-		+	4.02965	-0.911493	-9.1928	15.9736	15.8512	15.715	15.558	15.864	14.8075	14.9088	14.9263	8.83e-05	8.76e-05	21188.3	5	6	6	5	6	3	3	3
IKBKG	NF-kappa-B essential modulator;Isoform 2 of NF-kappa-B essential modulator	Q9Y6K9;Q9Y6K9-2	Q9Y6K9;Q9Y6K9-2	-		+	2.13938	-0.911088	-3.98343	16.8282	16.6886	16.4324	16.3989	16.4492	15.9954	15.8388	15.1109	0.000669043	0.000435329	48197.68;48197.68-2	8	6	4	6	8	3	3	3
RMDN3	Regulator of microtubule dynamics protein 3	Q96TC7	Q96TC7	+	Mitochondrial dynamics and surveillance;Organelle contact sites	+	3.00098	-0.910502	-5.96139	17.0594	17.01	17.2099	16.6856	17.1637	15.9738	16.3626	16.0092	0.00013	0.000115	52118.3	7	6	7	5	6	5	7	5
ATP6V1G1	V-type proton ATPase subunit G 1	O75348	O75348	-		+	2.95881	-0.909047	-5.85165	17.9625	17.5115	17.7918	17.7836	17.4024	16.9775	16.6295	16.7369	1.86e-05	3.67e-05	13757.5	4	3	4	3	3	3	4	3
FOXK1	Forkhead box protein K1	P85037	P85037	-		+	2.77735	-0.907909	-5.39629	15.843	15.8403	15.6873	15.4491	15.797	15.1024	14.8782	14.4657	0.0016305	0.00090262	75457.3	3	4	3	2	5	3	4	2
TRIP10	Cdc42-interacting protein 4	Q15642	Q15642	-		+	3.26089	-0.907689	-6.67279	16.7681	16.3872	16.7509	16.2753	16.5514	15.7301	15.6473	15.5393	0.000132	0.000116	68352.3	13	12	12	10	11	8	8	7
ITGBL1	Integrin beta-like protein 1	O95965	O95965	-		+	1.98646	-0.906866	-3.68114	14.6912	15.4203	15.7754	15.3536	15.1016	14.2187	14.3895	14.4765	0.00015308	0.000130561	53921.4	5	5	5	5	5	5	5	5
ARL6IP4	ADP-ribosylation factor-like protein 6-interacting protein 4;Isoform 2 of ADP-ribosylation factor-like protein 6-interacting protein 4;Isoform 3 of ADP-ribosylation factor-like protein 6-interacting protein 4;Isoform 4 of ADP-ribosylation factor-like protein 6-interacting protein 4;Isoform 7 of ADP-ribosylation factor-like protein 6-interacting protein 4	Q66PJ3;Q66PJ3-2;Q66PJ3-3;Q66PJ3-4;Q66PJ3-7	Q66PJ3;Q66PJ3-2;Q66PJ3-3;Q66PJ3-4;Q66PJ3-7	-		+	1.34901	-0.904022	-2.52851	15.8504	15.3252	15.5055	14.2665	15.4044	14.474	14.3208	14.3043	0.00148	0.000834	44915.41;44915.41-2;44915.41-3;44915.41-4;44915.41-7	2	2	2	1	2	2	2	2
CKAP4	Cytoskeleton-associated protein 4	Q07065	Q07065	-		+	4.81417	-0.903184	-12.5947	19.796	19.9591	19.7595	20.0393	19.8911	19.0285	18.9975	18.9314	3.97e-06	3.26e-05	66022.5	35	35	35	36	36	35	36	36
UBL4A	Ubiquitin-like protein 4A	P11441	P11441	-		+	2.56961	-0.903051	-5.50979	16.3626	15.8857	16.0704	15.8515	16.0411	15.0217	NaN	15.2566	0.000681084	0.000441035	17776.5	4	4	4	2	3	1	NaN	1
MRPS18A	39S ribosomal protein S18a, mitochondrial;Isoform 2 of 39S ribosomal protein S18a, mitochondrial	Q9NVS2;Q9NVS2-2	Q9NVS2;Q9NVS2-2	+	LSU;Mitochondrial central dogma;Mitochondrial ribosome;Translation	+	1.63435	-0.901418	-3.02627	15.6083	16.056	15.8201	15.3975	15.2955	15.1635	14.9303	14.1085	0.00211279	0.00111197	22183.98;22183.98-2	3	2	2	2	3	1	1	2
LNPK	Endoplasmic reticulum junction formation protein lunapark;Isoform 2 of Endoplasmic reticulum junction formation protein lunapark;Isoform 4 of Endoplasmic reticulum junction formation protein lunapark	Q9C0E8;Q9C0E8-2;Q9C0E8-4	Q9C0E8;Q9C0E8-2;Q9C0E8-4	-		+	2.9589	-0.898221	-5.85188	18.0292	17.8815	17.7452	17.407	17.5115	16.7896	16.8174	16.8429	0.00012974	0.000114779	47739.91;47739.91-2;47739.91-4	6	10	8	7	8	7	6	6
NHP2	H/ACA ribonucleoprotein complex subunit 2	Q9NX24	Q9NX24	-		+	2.78993	-0.898163	-5.42699	15.8745	15.7325	16.1714	15.9417	15.6819	15.1619	14.6579	15.127	0.00249017	0.00123952	17201	3	3	4	3	3	4	3	3
BNIP3L	BCL2/adenovirus E1B 19 kDa protein-interacting protein 3-like;Isoform 2 of BCL2/adenovirus E1B 19 kDa protein-interacting protein 3-like	O60238;O60238-2	O60238;O60238-2	+	Apoptosis;Mitochondrial dynamics and surveillance	+	2.78098	-0.897625	-5.40514	15.5306	15.381	15.5536	14.9214	15.3196	14.5426	14.2594	14.5288	0.00157	0.000876	23930.42;23930.42-2	2	2	2	1	2	1	1	1
CNN2	Calponin-2	Q99439	Q99439	-		+	1.90998	-0.897517	-3.53432	19.2831	19.0797	19.5598	18.4113	18.9912	18.1748	18.1636	18.1641	2.87e-05	4.46e-05	33697	12	11	13	10	12	11	12	11
HSPB6	Heat shock protein beta-6	O14558	O14558	-		+	2.0629	-0.897093	-3.83073	17.7657	18.2025	18.1853	17.2881	17.9964	16.8225	17.0942	17.0548	2.26e-05	4.03e-05	17135.6	6	6	6	6	6	6	6	6
MRPL39	39S ribosomal protein L39, mitochondrial;Isoform 2 of 39S ribosomal protein L39, mitochondrial	Q9NYK5;Q9NYK5-2	Q9NYK5;Q9NYK5-2	+	LSU;Mitochondrial central dogma;Mitochondrial ribosome;Translation	+	4.18559	-0.897014	-9.79364	16.4645	16.4113	16.2776	16.3513	16.5139	15.6526	15.5518	15.3157	0.000578	0.000387	38711.78;38711.78-2	11	10	7	7	8	2	3	4
VPS26C	Vacuolar protein sorting-associated protein 26C	O14972	O14972	-		+	5.24548	-0.89699	-14.9308	16.6649	16.844	16.795	16.9185	16.7247	15.9056	15.8639	15.9078	8.2e-05	8.33e-05	33010.4	7	6	7	6	7	6	6	7
DAZAP1	DAZ-associated protein 1;Isoform 2 of DAZ-associated protein 1	Q96EP5;Q96EP5-2	Q96EP5;Q96EP5-2	-		+	4.64917	-0.896901	-11.7956	17.6866	17.6079	17.5507	17.4206	17.6919	16.682	16.7861	16.6157	0.000131047	0.000115669	43383.38;43383.38-2	7	8	7	7	8	6	7	7
DCUN1D3	DCN1-like protein 3	Q8IWE4	Q8IWE4	-		+	3.75222	-0.896605	-8.2037	15.5371	15.781	15.6782	15.5252	15.423	14.7537	14.819	14.5042	0.000438	0.000309	34291.3	5	6	6	6	5	1	4	3
RNF114	E3 ubiquitin-protein ligase RNF114;Isoform 2 of E3 ubiquitin-protein ligase RNF114	Q9Y508;Q9Y508-2	Q9Y508;Q9Y508-2	-		+	3.42596	-0.896252	-7.15829	16.8087	16.6987	16.554	16.3133	16.7554	15.7097	15.8331	15.6466	7.16e-06	3.31e-05	25694.33;25694.33-2	5	5	4	4	5	4	4	5
HEBP1	Heme-binding protein 1	Q9NRV9	Q9NRV9	+	0	+	3.33733	-0.894693	-6.89421	18.9402	18.639	18.5674	18.4833	18.3945	17.7065	17.6244	17.7997	0.000112	0.000103	21097	7	7	7	7	7	6	6	6
PSME2	Proteasome activator complex subunit 2	Q9UL46	Q9UL46	-		+	3.77227	-0.893817	-8.27197	17.5983	17.9293	17.8977	17.5532	17.7764	16.799	16.9566	16.8159	5.83e-05	6.55e-05	27401.6	13	14	12	12	12	13	13	13
PACSIN3	Protein kinase C and casein kinase substrate in neurons protein 3	Q9UKS6	Q9UKS6	-		+	1.58872	-0.891069	-3.13609	16.4185	16.1448	15.3628	NaN	15.7598	14.8585	15.0372	15.1955	0.00275	0.00131	48486.8	4	4	2	NaN	3	1	2	2
LRRFIP1	Isoform 4 of Leucine-rich repeat flightless-interacting protein 1	Q32MZ4-4	Q32MZ4-4	-		+	1.43917	-0.890842	-2.68327	17.2216	16.8447	16.302	16.4102	17.0674	16.1369	15.2525	16.2457	0.00177	0.000966	73060.5	2	4	2	4	3	1	2	2
EDC3	Enhancer of mRNA-decapping protein 3	Q96F86	Q96F86	-		+	3.22722	-0.889877	-6.5771	16.2629	15.9841	15.799	15.9125	16.0789	14.9023	15.1445	15.306	0.000861	0.000531	56077.5	6	5	6	6	6	4	3	5
FHL1	Four and a half LIM domains protein 1	Q13642	Q13642	-			1.05616	-0.888365	-2.0365	17.8684	19.3305	19.0995	18.3516	19.644	18.029	17.9252	17.9571	7.74e-06	3.32e-05	36263	9	9	8	8	10	8	8	8
COIL	Coilin	P38432	P38432	-			0.503996	-0.888033	-1.12072	15.937	13.4498	15.7134	15.7556	15.8066	14.3305	NaN	14.5584	0.00130378	0.000750147	62608.3	2	2	2	1	1	2	NaN	2
SMURF2	E3 ubiquitin-protein ligase SMURF2	Q9HAU4	Q9HAU4	-		+	1.3623	-0.887174	-2.91589	15.8728	15.5366	NaN	15.4745	15.5663	NaN	15.172	14.2787	0.00289	0.00134	86195.8	7	8	NaN	2	5	NaN	1	1
OGT	UDP-N-acetylglucosamine--peptide N-acetylglucosaminyltransferase 110 kDa subunit	O15294	O15294	-		+	4.22324	-0.886766	-9.94387	16.7531	16.52	16.4569	16.5119	16.7743	15.7247	15.6905	15.7342	1.48e-05	3.47e-05	116925	19	14	14	19	18	11	14	14
ZNF598	E3 ubiquitin-protein ligase ZNF598;Isoform 2 of E3 ubiquitin-protein ligase ZNF598;Isoform 3 of E3 ubiquitin-protein ligase ZNF598	Q86UK7;Q86UK7-2;Q86UK7-3	Q86UK7;Q86UK7-2;Q86UK7-3	-		+	3.46651	-0.886193	-7.28182	15.6037	15.303	15.7577	15.6963	15.5895	14.7098	14.8502	14.5515	0.00037825	0.000273281	98637.05;98637.05-2;98637.05-3	8	4	3	2	4	4	5	5
UCKL1	Uridine-cytidine kinase-like 1;Isoform 4 of Uridine-cytidine kinase-like 1	Q9NWZ5;Q9NWZ5-4	Q9NWZ5;Q9NWZ5-4	-			1.24545	-0.885967	-2.35298	15.1098	14.9691	15.0741	14.706	15.1531	13.1639	14.363	14.8224	0.00224	0.00116	61141.01;61141.01-4	2	3	2	2	3	2	2	3
AIDA	Axin interactor, dorsalization-associated protein	Q96BJ3	Q96BJ3	-		+	5.30333	-0.884734	-15.2737	17.1565	17.0305	17.0538	17.0187	17.1733	16.2813	16.2214	16.1028	0.000105935	9.93e-05	35023.2	9	6	9	9	8	6	6	8
STARD5	StAR-related lipid transfer protein 5	Q9NSY2	Q9NSY2	-			0.841795	-0.880645	-1.73131	13.8471	15.4954	15.0374	15.0122	15.3763	NaN	13.8074	14.3387	9.98e-05	9.54e-05	23794.2	1	1	1	1	2	NaN	2	2
TTI1	TELO2-interacting protein 1 homolog	O43156	O43156	-			1.1001	-0.879831	-2.10963	15.4231	14.6534	16.4731	15.0389	15.0809	14.2971	14.5287	14.5363	0.00336591	0.00147772	122069	3	3	2	2	3	2	2	2
TCP11L1	T-complex protein 11-like protein 1	Q9NUJ3	Q9NUJ3	-		+	4.94634	-0.878719	-13.2711	16.8191	16.9406	16.9601	16.9506	16.989	15.9359	16.1876	16.0359	0.000131092	0.000115669	57034.9	6	6	6	8	6	4	5	3
FAM180A	Protein FAM180A	Q6UWF9	Q6UWF9	-		+	1.79862	-0.877689	-3.3253	16.2176	16.5382	15.5121	15.6818	16.3144	15.2312	15.0528	15.2415	0.000188196	0.000152962	19732.9	1	2	1	1	2	2	2	1
NUDT1	7,8-dihydro-8-oxoguanine triphosphatase;Isoform p22 of 7,8-dihydro-8-oxoguanine triphosphatase;Isoform p21 of 7,8-dihydro-8-oxoguanine triphosphatase;Isoform p18 of 7,8-dihydro-8-oxoguanine triphosphatase	P36639;P36639-2;P36639-3;P36639-4	P36639;P36639-2;P36639-3;P36639-4	-		+	4.18558	-0.877042	-9.79361	16.2246	16.3032	15.9979	16.0215	16.2203	15.1711	15.328	15.3302	4.73e-05	5.74e-05	22519.59;22519.59-2;22519.59-3;22519.59-4	6	4	4	4	5	3	3	3
GMPPA	Mannose-1-phosphate guanyltransferase alpha	Q96IJ6	Q96IJ6	-		+	4.76233	-0.875928	-12.3384	17.9933	17.8914	17.9896	17.7632	18.0243	17.1181	17.0768	16.9744	0.000126	0.000112	46291.2	8	8	8	8	9	8	7	9
MRPL28	39S ribosomal protein L28, mitochondrial	Q13084	Q13084	+	LSU;Mitochondrial central dogma;Mitochondrial ribosome;Translation		1.06549	-0.873538	-2.26711	16.2797	15.4937	NaN	16.3766	16.5565	NaN	15.0476	15.5585	0.000464737	0.000325108	30156.8	2	4	NaN	2	5	NaN	1	1
PRRC2A	Protein PRRC2A;Isoform 3 of Protein PRRC2A	P48634;P48634-3	P48634;P48634-3	-		+	1.33374	-0.873181	-2.50248	16.3734	16.3557	16.2387	16.1569	16.3168	15.7334	16.0258	14.4861	6.97e-05	7.36e-05	228863.18;228863.18-3	12	12	9	8	9	3	3	2
COX5B	Cytochrome c oxidase subunit 5B, mitochondrial	P10606	P10606	+	CIV subunits;Complex IV;OXPHOS;OXPHOS subunits	+	2.42296	-0.870659	-4.57861	16.2816	16.7287	16.1966	16.0511	16.4069	15.1729	15.5111	15.7029	0.00191	0.00103	13695.7	3	2	3	1	2	1	2	2
KIAA1217	Sickle tail protein homolog	Q5T5P2	Q5T5P2	-		+	1.74793	-0.870548	-3.23191	16.6063	16.2406	15.8719	15.403	16.0295	15.2256	15.0396	15.214	0.00069774	0.000449411	214116	11	8	2	6	7	4	4	3
POLD2	DNA polymerase delta subunit 2	P49005	P49005	-		+	2.2596	-0.86887	-4.66638	15.7025	15.4456	14.9676	NaN	15.4391	14.4462	14.4956	14.6177	0.00249	0.00124	51289.5	2	3	1	NaN	2	1	2	1
EPS15	Epidermal growth factor receptor substrate 15	P42566	P42566	-		+	3.56465	-0.868367	-7.58814	16.357	16.2427	16.2674	15.8943	16.107	15.2218	15.2871	15.4071	0.000116	0.000105	98655.7	20	19	15	18	17	7	9	12
TXN	Thioredoxin	P10599	P10599	-		+	4.00651	-0.867708	-9.10652	19.9552	19.9073	19.7357	20.0423	19.6889	18.9798	19.0865	18.9283	1.46e-05	3.47e-05	11737.5	6	5	6	6	6	6	6	6
MRPL38	39S ribosomal protein L38, mitochondrial	Q96DV4	Q96DV4	+	LSU;Mitochondrial central dogma;Mitochondrial ribosome;Translation	+	4.52288	-0.866547	-11.216	16.9869	17.0559	16.9035	16.7606	17.0572	16.1253	16.1043	16.0293	0.000193	0.000156	44596.5	5	6	6	6	6	4	6	4
PVR	Poliovirus receptor;Isoform Beta of Poliovirus receptor;Isoform Gamma of Poliovirus receptor;Isoform Delta of Poliovirus receptor	P15151;P15151-2;P15151-3;P15151-4	P15151;P15151-2;P15151-3;P15151-4	-		+	3.26647	-0.866286	-6.68877	16.0212	15.512	15.4822	15.6235	15.7193	14.8058	14.8212	14.789	0.000390513	0.000280651	45302.6;45302.6-2;45302.6-3;45302.6-4	3	3	4	3	3	3	3	3
ADD1	Alpha-adducin;Isoform 2 of Alpha-adducin;Isoform 3 of Alpha-adducin;Isoform 6 of Alpha-adducin	P35611;P35611-2;P35611-3;P35611-6	P35611;P35611-2;P35611-3;P35611-6	-		+	2.79287	-0.865379	-5.43419	17.5494	17.4587	17.694	17.0118	17.5949	16.6333	16.5514	16.6044	4.03e-05	5.23e-05	80955.13;80955.13-2;80955.13-3;80955.13-6	20	19	19	17	18	14	15	18
NOTCH2	Neurogenic locus notch homolog protein 2	Q04721	Q04721	-		+	1.53543	-0.864851	-2.85095	16.5491	16.146	16.3368	15.2415	16.1515	15.0669	15.3259	15.2677	1.15e-05	3.36e-05	265405	12	11	11	7	11	9	11	7
CPT1A	Carnitine O-palmitoyltransferase 1, liver isoform	P50416	P50416	+	Carnitine shuttle;Carnitine synthesis and transport;Fatty acid oxidation;Lipid metabolism;Metabolism;Metals and cofactors	+	3.82069	-0.864848	-8.43878	17.4923	17.2149	17.0553	17.1357	17.2883	16.4102	16.4008	16.3064	6.92e-05	7.32e-05	88367.6	19	19	17	18	19	15	14	13
CHERP	Calcium homeostasis endoplasmic reticulum protein	Q8IWX8	Q8IWX8	-		+	1.52555	-0.863835	-2.83362	15.4295	14.9564	14.4097	15.0128	15.1117	14.2286	14.5567	13.5753	0.000832726	0.000517276	103702	6	6	5	5	4	2	1	2
RNF2	E3 ubiquitin-protein ligase RING2	Q99496	Q99496	-		+	2.91791	-0.86216	-5.74665	16.3068	16.449	16.03	16.0326	16.1518	15.0747	15.5643	15.3567	0.00297305	0.00134943	37655.4	2	2	3	4	3	1	1	2
AK2	Adenylate kinase 2, mitochondrial;Isoform 2 of Adenylate kinase 2, mitochondrial	P54819;P54819-2	P54819;P54819-2	+	Metabolism;Nucleotide metabolism;Nucleotide synthesis and processing	+	3.51545	-0.85988	-7.43327	17.4429	17.4637	17.7267	17.2693	17.308	16.6845	16.5839	16.4783	0.000129439	0.000114672	26477.74;26477.74-2	12	13	13	12	14	9	10	10
TAPT1	Transmembrane anterior posterior transformation protein 1 homolog	Q6NXT6	Q6NXT6	-		+	3.0457	-0.855686	-6.07944	16.1528	16.2945	15.985	15.9527	15.8319	15.4346	15.0681	15.0604	0.00294804	0.00134551	64259.6	4	5	5	4	4	3	2	2
FAHD1	Acylpyruvase FAHD1, mitochondrial;Isoform 2 of Acylpyruvase FAHD1, mitochondrial;Isoform 3 of Acylpyruvase FAHD1, mitochondrial	Q6P587;Q6P587-2;Q6P587-3	Q6P587;Q6P587-2;Q6P587-3	+	Carbohydrate metabolism;Metabolism;TCA-associated	+	2.92536	-0.855566	-5.76567	16.8591	17.1562	16.8264	16.7434	16.881	15.7218	16.1773	16.2138	6.84e-05	7.26e-05	24842.94;24842.94-2;24842.94-3	5	6	4	4	6	4	4	5
MRPL45	39S ribosomal protein L45, mitochondrial	Q9BRJ2	Q9BRJ2			+	3.84606	-0.855519	-8.52736	16.3004	16.2102	16.1398	16.0889	16.2847	15.4815	15.4472	15.1192	0.0016755	0.000924033	35350.9	6	7	4	8	7	2	3	5
GSTM4	Glutathione S-transferase Mu 4;Isoform 2 of Glutathione S-transferase Mu 4	Q03013;Q03013-2	Q03013;Q03013-2	-			0.467013	-0.855518	-1.03358	16.2041	18.893	18.2388	15.8033	18.2825	16.4461	16.6872	16.7531	0.000163	0.000137	25561.36;25561.36-2	2	3	3	2	4	2	1	1
LRRC41	Leucine-rich repeat-containing protein 41	Q15345	Q15345	-			0.688097	-0.855401	-1.45636	15.4462	13.909	14.3062	15.5851	15.4874	14.2088	NaN	13.9739	0.000732	0.000466	88649.5	3	3	3	2	4	2	NaN	3
PEX14	Peroxisomal membrane protein PEX14;Isoform 2 of Peroxisomal membrane protein PEX14	O75381;O75381-2	O75381;O75381-2	-		+	3.52688	-0.854566	-7.469	16.6457	16.556	16.3465	16.1941	16.5275	15.5472	15.7014	15.5496	8.06e-05	8.22e-05	41236.61;41236.61-2	5	5	4	4	6	4	5	4
C17orf75	Protein Njmu-R1	Q9HAS0	Q9HAS0	-		+	2.81777	-0.853528	-5.49542	16.0388	15.9559	15.9954	16.0311	16.0437	15.3521	15.3873	14.7389	0.000748	0.000474	44621.5	3	4	3	3	1	2	3	2
COPS4	COP9 signalosome complex subunit 4	Q9BT78	Q9BT78	-		+	5.25594	-0.853097	-14.9922	17.6142	17.6751	17.7327	17.6419	17.5501	16.772	16.8919	16.7053	6.45e-05	7e-05	46268.8	16	15	16	16	13	11	14	13
RAD23B	UV excision repair protein RAD23 homolog B	P54727	P54727	-		+	2.7168	-0.852105	-5.25014	18.6782	18.9572	18.7599	18.2269	18.743	17.8561	17.7696	17.8371	2.7e-06	3.26e-05	43171.2	15	13	16	13	16	13	13	14
ATXN2	Ataxin-2;Isoform 2 of Ataxin-2;Isoform 4 of Ataxin-2	Q99700;Q99700-2;Q99700-4	Q99700;Q99700-2;Q99700-4	-		+	2.57572	-0.851574	-4.92017	16.517	16.3111	16.2486	16.1112	16.3717	15.0553	15.6408	15.685	3.47e-05	4.87e-05	140282.81;140282.81-2;140282.81-4	15	16	11	14	15	4	7	7
PLEC	Isoform 4 of Plectin	Q15149-4	Q15149-4	-			0.959384	-0.850205	-1.87573	18.4917	19.197	19.1171	17.7608	19.7446	18.0641	18.0099	17.9622	0.00013708	0.000119689	516198	2	2	2	2	2	2	2	2
VPS37A	Vacuolar protein sorting-associated protein 37A	Q8NEZ2	Q8NEZ2	-		+	3.75265	-0.849535	-8.20518	15.1858	14.971	15.1513	15.24	15.2014	14.4583	14.3612	14.0816	0.00112	0.000664	44314.4	7	5	4	7	6	3	4	4
NUDT16	U8 snoRNA-decapping enzyme	Q96DE0	Q96DE0	-		+	3.99498	-0.848971	-9.06377	17.3737	17.0544	17.1713	17.0221	17.1497	16.1986	16.4123	16.305	0.00017	0.000141	21273.4	10	7	7	8	10	5	4	6
FTO	Alpha-ketoglutarate-dependent dioxygenase FTO	Q9C0B1	Q9C0B1	-		+	3.64918	-0.84717	-7.86053	16.6725	16.8449	16.4999	16.5186	16.8305	15.9379	15.7269	15.8135	4.99e-05	5.95e-05	58282	12	9	13	11	13	4	10	6
VAPA	Vesicle-associated membrane protein-associated protein A	Q9P0L0	Q9P0L0	-		+	3.98814	-0.846746	-9.0385	18.2667	18.1665	18.2179	17.9438	18.0711	17.1654	17.2731	17.4208	2.95e-06	3.26e-05	27893.2	7	7	7	7	7	6	6	6
SERPINC1	Antithrombin-III	P01008	P01008	-		+	2.47486	-0.846711	-4.6929	18.4321	17.9933	18.7612	18.5776	18.6494	17.5679	17.7081	17.6321	6.81e-05	7.25e-05	52602.4	4	3	4	3	4	3	3	4
ASL	Argininosuccinate lyase;Isoform 2 of Argininosuccinate lyase	P04424;P04424-2	P04424;P04424-2	-		+	2.51242	-0.846452	-4.77674	17.2452	17.1971	17.4431	16.9251	17.7191	16.4468	16.5042	16.4274	1.23e-05	3.37e-05	51657.97;51657.97-2	17	16	16	16	17	15	14	13
ADAMTSL1	ADAMTS-like protein 1	Q8N6G6	Q8N6G6	-			0.497513	-0.845778	-1.13965	15.7166	14.0376	NaN	14.1304	15.5961	NaN	13.5481	14.5007	0.000838	0.00052	193409	2	2	NaN	1	2	NaN	1	1
FIP1L1	Pre-mRNA 3'-end-processing factor FIP1;Isoform 3 of Pre-mRNA 3'-end-processing factor FIP1;Isoform 5 of Pre-mRNA 3'-end-processing factor FIP1	Q6UN15;Q6UN15-3;Q6UN15-5	Q6UN15;Q6UN15-3;Q6UN15-5	-		+	2.43871	-0.845712	-4.61311	17.322	17.0648	16.9469	16.7373	17.2518	16.3063	15.9065	16.4438	0.000203	0.000163	66526.39;66526.39-3;66526.39-5	6	5	5	4	6	3	2	3
NTPCR	Cancer-related nucleoside-triphosphatase	Q9BSD7	Q9BSD7	-		+	1.74748	-0.845287	-3.23108	16.5775	17.4127	17.0052	17.4568	16.5564	16.2524	16.1388	16.078	0.000119	0.000108	20713.1	7	9	8	8	4	3	3	5
RABL3	Rab-like protein 3	Q5HYI8	Q5HYI8	-			0.64633	-0.843103	-1.34982	19.448	17.2748	17.3617	17.2596	17.0653	16.7322	16.4306	17.3536	0.00173	0.000947	26422.8	2	3	3	4	3	4	4	5
WNT5B	Protein Wnt-5b	Q9H1J7	Q9H1J7	-		+	1.52565	-0.841987	-2.83379	16.8438	17.1838	17.2179	18.0139	16.7539	16.3103	16.3695	16.4022	0.000163	0.000137	40323.2	3	4	2	2	2	3	3	4
SH3BGRL3	SH3 domain-binding glutamic acid-rich-like protein 3	Q9H299	Q9H299	-		+	3.34796	-0.841597	-6.92545	19.8721	20.06	20.1842	19.6636	19.912	19.1153	19.1577	19.0174	3.5e-05	4.88e-05	10437.7	3	3	3	3	3	3	3	3
ANXA2	Annexin A2	P07355	P07355	-		+	3.64467	-0.840669	-7.84577	21.0746	20.8162	20.8812	20.5895	20.7354	19.9763	19.9686	19.9912	9.14e-06	3.33e-05	38604	42	41	43	39	41	38	38	38
TBC1D13	TBC1 domain family member 13	Q9NVG8	Q9NVG8	-		+	3.72522	-0.839928	-8.11258	16.9979	17.1392	16.8246	16.7557	17.05	16.0233	16.1001	16.2173	4e-05	5.21e-05	46553.5	10	9	9	9	9	5	6	6
FGGY	FGGY carbohydrate kinase domain-containing protein;Isoform 4 of FGGY carbohydrate kinase domain-containing protein	Q96C11;Q96C11-3	Q96C11;Q96C11-3	-		+	2.10024	-0.839751	-3.9049	13.7613	14.661	14.5723	14.4086	14.4583	13.5242	13.6226	13.4509	0.00252	0.00125	59993.07;59993.07-3	2	2	2	2	1	1	2	1
AKAP12	A-kinase anchor protein 12;Isoform 2 of A-kinase anchor protein 12;Isoform 3 of A-kinase anchor protein 12	Q02952;Q02952-2;Q02952-3	Q02952;Q02952-2;Q02952-3	-		+	2.11159	-0.839623	-3.92759	16.1285	15.3745	16.3312	15.9981	15.9227	15.1536	15.0922	15.0884	9.42e-06	3.34e-05	191481.78;191481.78-2;191481.78-3	43	33	39	37	39	8	13	11
IGBP1	Immunoglobulin-binding protein 1	P78318	P78318	-		+	2.18335	-0.834444	-4.07266	16.7676	16.5672	16.5432	15.9088	16.5543	15.5674	15.8087	15.5251	0.000612	0.000404	39221.9	8	9	9	6	9	5	6	3
KIFAP3	Kinesin-associated protein 3;Isoform 2 of Kinesin-associated protein 3;Isoform 3 of Kinesin-associated protein 3;Isoform 4 of Kinesin-associated protein 3	Q92845;Q92845-2;Q92845-3;Q92845-4	Q92845;Q92845-2;Q92845-3;Q92845-4	-		+	1.53413	-0.834312	-3.02546	NaN	16.2872	15.7412	16.3474	16.0266	15.5883	14.7406	15.4699	0.00587874	0.00252269	91205.14;91205.14-2;91205.14-3;91205.14-4	NaN	1	1	1	1	2	1	1
PRKAR2A	cAMP-dependent protein kinase type II-alpha regulatory subunit;Isoform 2 of cAMP-dependent protein kinase type II-alpha regulatory subunit	P13861;P13861-2	P13861;P13861-2	-		+	3.70458	-0.834278	-8.04348	17.5777	17.3946	17.6179	17.6475	17.7147	16.6579	16.9611	16.6495	7.04e-06	3.31e-05	45518.4;45518.4-2	18	18	19	18	18	14	13	13
RPA2	Replication protein A 32 kDa subunit;Isoform 2 of Replication protein A 32 kDa subunit;Isoform 3 of Replication protein A 32 kDa subunit	P15927;P15927-2;P15927-3	P15927;P15927-2;P15927-3	-		+	3.26059	-0.834137	-6.67195	16.5958	16.4032	16.5431	16.6464	16.7486	15.5048	15.9719	15.7832	0.000774	0.000488	29246.85;29246.85-2;29246.85-3	4	4	4	5	5	3	1	2
NAPG	Gamma-soluble NSF attachment protein	Q99747	Q99747	mito-interacting		+	5.40032	-0.832594	-15.8657	16.6949	16.7951	16.6741	16.8929	16.7869	15.9276	15.9381	15.943	2.63e-05	4.29e-05	34746.3	10	6	6	8	8	6	9	8
MTMR2	Myotubularin-related protein 2;Isoform 2 of Myotubularin-related protein 2	Q13614;Q13614-2	Q13614;Q13614-2	-		+	3.07753	-0.831793	-6.16453	16.5842	16.0174	16.2064	16.2021	16.0476	15.4029	15.3533	15.3831	0.00181	0.000988	73381.22;73381.22-2	5	4	4	4	4	6	3	4
SMAD2	Mothers against decapentaplegic homolog 2;Isoform Short of Mothers against decapentaplegic homolog 2	Q15796;Q15796-2	Q15796;Q15796-2	-		+	3.29601	-0.831439	-6.77382	17.3447	17.3254	16.919	17.0567	17.307	16.2898	16.3068	16.4808	0.0022	0.00114	52306.12;52306.12-2	1	1	1	1	2	2	2	1
SCFD1	Sec1 family domain-containing protein 1	Q8WVM8	Q8WVM8	-		+	3.95598	-0.829608	-8.92051	17.3694	17.3497	17.6166	17.5131	17.3889	16.4443	16.6991	16.7105	1.15e-05	3.36e-05	72379.9	16	16	17	16	17	16	16	14
WASHC2C	WASH complex subunit 2C;Isoform 6 of WASH complex subunit 2C	Q9Y4E1;Q9Y4E1-6	Q9Y4E1;Q9Y4E1-6	-		+	3.57883	-0.827595	-7.63327	16.3695	16.0636	16.2082	16.3999	16.2385	15.6207	15.29	15.3744	0.000211	0.000168	144911.14;144911.14-6	13	14	15	13	16	5	8	6
CORO2B	Coronin-2B;Isoform 2 of Coronin-2B	Q9UQ03;Q9UQ03-2	Q9UQ03;Q9UQ03-2	-		+	1.48341	-0.824516	-2.75999	16.8813	16.061	16.1879	15.8923	16.6763	15.0999	15.8604	15.5855	0.00212139	0.00111452	54953.42;54953.42-2	4	2	3	1	2	2	2	1
ASS1	Argininosuccinate synthase	P00966	P00966	-			0.620403	-0.821299	-1.30514	16.5432	18.7369	18.1654	19.2209	18.8577	17.4983	17.4879	17.4644	1.04e-05	3.35e-05	46530.4	15	21	18	21	20	13	15	16
TMEM119	Transmembrane protein 119	Q4V9L6	Q4V9L6	-		+	1.39104	-0.820692	-2.6004	18.1018	18.2143	19.0215	17.59	17.9742	17.4233	17.2624	17.3933	5e-05	5.96e-05	29202.9	5	5	5	5	5	5	5	5
H2AC11;H2AC7;H2AC20;H2AC18;H2AC12;H2AC14;H2AJ	Histone H2A type 1;Histone H2A type 1-D;Histone H2A type 2-C;Histone H2A type 2-A;Histone H2A type 1-H;Histone H2A type 1-J;Histone H2A.J	P0C0S8;P20671;Q16777;Q6FI13;Q96KK5;Q99878;Q9BTM1	P0C0S8;P20671;Q16777;Q6FI13;Q96KK5;Q99878;Q9BTM1	-		+	4.03056	-0.819967	-9.19621	21.4976	21.3489	21.3899	21.155	21.4841	20.6402	20.4782	20.547	4.14e-05	5.31e-05	13906.25;13936.28;13988.37;14019.41;14091.48;14095.48;14107.48	5	5	4	4	5	4	4	4
VAT1	Synaptic vesicle membrane protein VAT-1 homolog	Q99536	Q99536	-		+	3.39785	-0.819773	-7.07364	18.9273	19.1091	19.1179	18.7935	18.6855	18.1582	18.055	18.1075	6.44e-06	3.31e-05	41920.2	19	20	20	20	19	19	20	19
NUFIP2	Nuclear fragile X mental retardation-interacting protein 2	Q7Z417	Q7Z417	-		+	7.25434	-0.817471	-32.5739	16.6582	16.662	16.7007	16.6687	16.6919	15.849	15.9162	15.8112	0.000672	0.000436	76121.1	7	6	6	7	8	4	4	5
GIT2	ARF GTPase-activating protein GIT2;Isoform 3 of ARF GTPase-activating protein GIT2;Isoform 4 of ARF GTPase-activating protein GIT2	Q14161;Q14161-3;Q14161-4	Q14161;Q14161-3;Q14161-4	-		+	4.13264	-0.816405	-9.58582	15.7158	15.8746	15.8081	15.5122	15.6806	14.879	14.9603	14.8663	0.000947	0.000575	84542.72;84542.72-3;84542.72-4	11	11	10	10	7	5	9	8
	Uncharacterized protein FLJ45252	Q6ZSR9	Q6ZSR9			+	1.76744	-0.816351	-3.26772	18.0658	17.8984	17.7514	17.1351	17.9798	16.6343	17.0813	17.1337	0.00276	0.00131	37976.1	3	2	2	2	2	1	1	1
PUDP	Pseudouridine-5'-phosphatase;Isoform 3 of Pseudouridine-5'-phosphatase;Isoform 4 of Pseudouridine-5'-phosphatase	Q08623;Q08623-3;Q08623-4	Q08623;Q08623-3;Q08623-4	-			0.772297	-0.815973	-1.60717	16.161	17.5177	16.5827	15.7625	16.6939	15.4912	15.964	NaN	0.00109	0.000647	25249.25;25249.25-3;25249.25-4	2	4	3	1	4	2	1	NaN
SDF4	45 kDa calcium-binding protein	Q9BRK5	Q9BRK5	-		+	3.75702	-0.814521	-8.22002	16.6694	16.803	16.8278	16.5287	16.936	15.8511	15.9737	15.9906	3.65e-05	4.99e-05	41806.8	14	15	12	10	13	9	8	10
PGM3	Phosphoacetylglucosamine mutase;Isoform 3 of Phosphoacetylglucosamine mutase	O95394;O95394-4	O95394;O95394-4	-		+	3.58385	-0.814131	-7.6493	17.6196	17.7098	17.9712	17.9162	17.5856	16.8849	16.9862	16.968	1.03e-05	3.35e-05	59851.95;59851.95-4	17	17	19	19	18	16	15	17
POLR3C	DNA-directed RNA polymerase III subunit RPC3	Q9BUI4	Q9BUI4	-		+	2.52551	-0.813576	-4.80618	15.8089	16.282	16.3831	16.5321	16.3297	15.5635	15.4557	15.3416	0.0217	0.00872	60611.6	1	3	3	1	3	1	2	2
RPL38	60S ribosomal protein L38	P63173	P63173	-		+	2.46047	-0.813226	-4.66104	19.8169	19.8437	19.9171	19.7924	19.8231	19.1478	19.3585	18.5699	8.97e-06	3.33e-05	8217.88	6	6	6	6	6	6	6	5
MRPL19	39S ribosomal protein L19, mitochondrial	P49406	P49406	+	LSU;Mitochondrial central dogma;Mitochondrial ribosome;Translation	+	3.37858	-0.812984	-7.0161	17.5706	17.4925	17.2551	17.1076	17.4777	16.5294	16.6027	16.5711	1.41e-05	3.45e-05	33534.9	3	3	3	2	3	2	2	3
CARHSP1	Calcium-regulated heat-stable protein 1	Q9Y2V2	Q9Y2V2	-		+	1.83169	-0.812559	-3.38679	18.3384	18.0355	17.5086	17.3831	17.951	17.0284	16.9092	17.1546	4.41e-05	5.52e-05	15892	5	5	5	4	5	4	4	3
KANK2	KN motif and ankyrin repeat domain-containing protein 2;Isoform 3 of KN motif and ankyrin repeat domain-containing protein 2	Q63ZY3;Q63ZY3-3	Q63ZY3;Q63ZY3-3	-		+	3.49331	-0.812436	-7.36443	16.9368	17.3634	17.2936	17.1294	17.2127	16.404	16.4754	16.2449	2.88e-07	3.26e-05	91174.45;91174.45-3	18	19	22	19	21	14	14	15
OPTN	Optineurin;Isoform 2 of Optineurin	Q96CV9;Q96CV9-2	Q96CV9;Q96CV9-2	mito-interacting		+	2.54355	-0.812046	-4.84693	16.733	16.533	16.2673	16.103	16.2232	15.3952	15.7241	15.5603	3.73e-05	5.03e-05	65922.04;65922.04-2	20	18	19	20	19	14	16	17
YBX1	Y-box-binding protein 1	P67809	P67809	-		+	3.28355	-0.810756	-6.73782	18.4711	18.4847	18.5374	18.3379	18.5891	17.9063	17.4051	17.7084	4.87e-05	5.85e-05	35924.2	7	7	7	7	7	7	7	7
UQCR10	Cytochrome b-c1 complex subunit 9	Q9UDW1	Q9UDW1	+	CIII subunits;Complex III;OXPHOS;OXPHOS subunits	+	3.1443	-0.80872	-6.34601	17.7176	17.4213	17.4454	17.8527	17.6065	16.6948	16.7242	16.9808	0.000595434	0.000395941	7308.49	2	2	2	2	2	2	2	2
TUBA1C	Tubulin alpha-1C chain	Q9BQE3	Q9BQE3	-		+	4.08863	-0.808434	-9.41608	19.8793	20.0283	19.7369	19.9119	20.0962	19.1135	19.0747	19.1781	5.29e-05	6.11e-05	49895.3	2	2	2	2	2	2	2	2
GSTO1	Glutathione S-transferase omega-1	P78417	P78417	mito-interacting		+	5.04171	-0.806776	-13.7802	18.8543	18.9576	18.7775	18.8454	18.8161	17.9271	18.1126	18.0905	1.23e-05	3.37e-05	27565.8	18	18	15	17	17	15	16	16
RPAP1	RNA polymerase II-associated protein 1;Isoform 2 of RNA polymerase II-associated protein 1	Q9BWH6;Q9BWH6-2	Q9BWH6;Q9BWH6-2	-		+	2.47141	-0.806463	-4.68526	15.9655	15.5314	15.2189	15.4795	15.6198	14.59	14.8352	14.8445	0.0026562	0.00128565	152754.72;152754.72-2	6	5	3	4	5	3	3	3
ABLIM3	Isoform 2 of Actin-binding LIM protein 3;Isoform 3 of Actin-binding LIM protein 3	O94929-2;O94929-3	O94929-2;O94929-3	-		+	1.59577	-0.805658	-2.95751	16.5592	16.6817	16.0884	15.8351	16.7729	15.2674	15.6219	15.8561	0.00165	0.000912	61570.32;67072.65	6	6	4	3	5	1	1	1
PPP6R2	Serine/threonine-protein phosphatase 6 regulatory subunit 2;Isoform 2 of Serine/threonine-protein phosphatase 6 regulatory subunit 2;Isoform 3 of Serine/threonine-protein phosphatase 6 regulatory subunit 2;Isoform 4 of Serine/threonine-protein phosphatase 6 regulatory subunit 2;Isoform 5 of Serine/threonine-protein phosphatase 6 regulatory subunit 2;Isoform 6 of Serine/threonine-protein phosphata…	O75170;O75170-2;O75170-3;O75170-4;O75170-5;O75170-6	O75170;O75170-2;O75170-3;O75170-4;O75170-5;O75170-6	-		+	3.30684	-0.805211	-6.8052	15.3616	15.4663	15.1759	15.2829	15.3004	14.2554	14.721	14.5602	0.000864022	0.000532616	104941.75;104941.75-2;104941.75-3;104941.75-4;104941.75-5;104941.75-6	9	11	5	3	9	4	4	4
STOML1	Stomatin-like protein 1;Isoform 2 of Stomatin-like protein 1;Isoform 3 of Stomatin-like protein 1;Isoform 4 of Stomatin-like protein 1;Isoform 6 of Stomatin-like protein 1	Q9UBI4;Q9UBI4-2;Q9UBI4-3;Q9UBI4-4;Q9UBI4-6	Q9UBI4;Q9UBI4-2;Q9UBI4-3;Q9UBI4-4;Q9UBI4-6	-		+	1.99795	-0.804145	-4.02736	16.9706	16.6586	16.525	16.3723	16.866	16.027	15.7217	NaN	0.000115	0.000105	42968.09;42968.09-2;42968.09-3;42968.09-4;42968.09-6	3	3	2	2	2	1	3	NaN
PHLDB1	Isoform 2 of Pleckstrin homology-like domain family B member 1	Q86UU1-2	Q86UU1-2	-		+	4.3332	-0.803099	-10.3946	16.3074	16.3692	16.5511	16.3827	16.3104	15.6579	15.6398	15.4455	0.000532	0.000362	144739	17	16	16	15	15	8	13	7
MRPL2	39S ribosomal protein L2, mitochondrial	Q5T653	Q5T653	+	LSU;Mitochondrial central dogma;Mitochondrial ribosome;Translation	+	5.63204	-0.802231	-17.3706	16.9416	16.9025	16.9384	16.9589	17.0962	16.1978	16.1451	16.1529	0.000151	0.000129	33300.8	4	3	3	3	3	4	4	3
MPRIP	Myosin phosphatase Rho-interacting protein;Isoform 2 of Myosin phosphatase Rho-interacting protein	Q6WCQ1;Q6WCQ1-2	Q6WCQ1;Q6WCQ1-2	-		+	4.66006	-0.80048	-11.8469	16.8863	16.7247	16.818	16.6248	16.7553	15.9342	16.0504	15.8994	3.39e-05	4.83e-05	116533.17;116533.17-2	38	36	35	33	38	25	26	23
ATRX	Transcriptional regulator ATRX;Isoform 2 of Transcriptional regulator ATRX;Isoform 3 of Transcriptional regulator ATRX;Isoform 5 of Transcriptional regulator ATRX	P46100;P46100-3;P46100-4;P46100-5	P46100;P46100-3;P46100-4;P46100-5	-			1.14489	-0.79969	-2.27895	14.4475	15.3425	NaN	15.7408	14.8303	14.5248	14.2268	14.1202	0.0108734	0.00454107	282585.74;282585.74-3;282585.74-4;282585.74-5	2	3	NaN	1	5	3	3	5
SAE1	SUMO-activating enzyme subunit 1	Q9UBE0	Q9UBE0	-		+	5.07904	-0.799087	-13.9845	17.0293	16.972	16.9875	17.0387	17.0445	16.1104	16.1785	16.3572	0.000388541	0.000279578	38449.8	12	14	12	11	12	10	9	11
NAA20	N-alpha-acetyltransferase 20	P61599	P61599	-		+	2.07285	-0.79877	-4.20414	17.3689	16.9484	NaN	17.4947	17.1841	16.2542	16.7513	16.3453	0.00282	0.00133	20368.2	3	3	NaN	1	2	1	2	2
SKP1	S-phase kinase-associated protein 1	P63208	P63208	-		+	4.26598	-0.797579	-10.1169	17.3179	17.5275	17.3765	17.2739	17.2264	16.4975	16.6493	16.4938	7.24e-05	7.59e-05	18658	6	6	7	7	6	5	5	6
NDUFA10	NADH dehydrogenase [ubiquinone] 1 alpha subcomplex subunit 10, mitochondrial	O95299	O95299	+	CI subunits;Complex I;OXPHOS;OXPHOS subunits	+	4.90159	-0.797198	-13.0383	17.1772	17.208	17.2226	17.2457	17.0847	16.4204	16.2637	16.4872	1.21e-05	3.37e-05	40750.6	9	10	10	9	8	8	7	6
STEAP1	Metalloreductase STEAP1	Q9UHE8	Q9UHE8	-			0.812629	-0.795744	-1.67922	14.9616	13.8752	13.8058	NaN	14.874	14.2527	13.0414	13.4561	0.00287086	0.00133117	39851.1	3	3	2	NaN	3	1	3	2
UTP11	Probable U3 small nucleolar RNA-associated protein 11	Q9Y3A2	Q9Y3A2	-			0.629312	-0.795403	-1.48263	14.7978	15.7547	NaN	NaN	15.9706	NaN	15.0707	14.3539	0.00641879	0.00274839	30446.5	2	1	NaN	NaN	1	1	2	2
PPFIA1	Liprin-alpha-1	Q13136	Q13136	-		+	4.12725	-0.793786	-9.56491	15.6118	15.7625	15.9037	15.6828	15.6916	15.0715	14.8439	14.8947	0.00210447	0.00110986	135779	7	7	7	7	8	4	3	4
SLC27A1	Long-chain fatty acid transport protein 1	Q6PCB7	Q6PCB7	-		+	1.77337	-0.793455	-3.27864	15.4507	16.1731	15.9598	15.1718	15.6803	14.7618	14.9403	14.9789	0.000119	0.000107	71108.2	3	10	8	8	7	6	8	7
PGPEP1	Pyroglutamyl-peptidase 1	Q9NXJ5	Q9NXJ5	-		+	3.00982	-0.793168	-5.98458	16.7618	16.8396	16.5819	17.0745	16.7683	15.8059	16.1747	16.0556	0.000729268	0.000464805	23138.3	2	2	2	2	2	2	3	2
TMED1	Transmembrane emp24 domain-containing protein 1	Q13445	Q13445	-		+	3.67017	-0.79312	-7.92942	17.1202	17.2084	17.28	17.4397	17.0294	16.3416	16.5104	16.4152	5.63e-06	3.26e-05	25205.8	5	4	5	6	5	4	5	5
MEF2D	Myocyte-specific enhancer factor 2D;Isoform MEF2DA'B of Myocyte-specific enhancer factor 2D;Isoform MEF2D0B of Myocyte-specific enhancer factor 2D;Isoform MEF2DA0 of Myocyte-specific enhancer factor 2D;Isoform MEF2DA'0 of Myocyte-specific enhancer factor 2D;Isoform MEF2D00 of Myocyte-specific enhancer factor 2D	Q14814;Q14814-2;Q14814-3;Q14814-4;Q14814-5;Q14814-6	Q14814;Q14814-2;Q14814-3;Q14814-4;Q14814-5;Q14814-6	-			1.07429	-0.792051	-2.54546	NaN	15.3016	NaN	NaN	15.3634	14.9941	14.1758	14.4515	0.00232112	0.0011823	55937.81;55937.81-2;55937.81-3;55937.81-4;55937.81-5;55937.81-6	NaN	1	NaN	NaN	1	1	1	1
CYB5R2	NADH-cytochrome b5 reductase 2	Q6BCY4	Q6BCY4	-		+	1.83199	-0.791782	-3.65161	NaN	15.8459	16.1564	15.9421	15.3214	14.9098	15.1365	15.0278	0.00102777	0.00061603	31458.3	NaN	1	3	3	2	4	3	5
RFC1	Replication factor C subunit 1;Isoform 2 of Replication factor C subunit 1	P35251;P35251-2	P35251;P35251-2	-			1.02194	-0.791244	-1.97963	15.4188	15.9867	15.7705	14.5972	15.5099	15.2604	14.0997	14.6361	0.000185734	0.000151488	128254.57;128254.57-2	4	3	3	3	4	3	3	2
TPM1	Isoform 7 of Tropomyosin alpha-1 chain	P09493-7	P09493-7	-		+	1.49614	-0.788239	-2.78218	18.0234	17.8423	18.8604	18.4797	18.3593	17.2859	17.9463	17.3423	2.52e-05	4.23e-05	32677.5	7	8	7	8	8	4	3	5
TRIM56	E3 ubiquitin-protein ligase TRIM56	Q9BRZ2	Q9BRZ2	-		+	4.22215	-0.788214	-9.93952	15.5933	15.7395	15.7316	15.7278	15.591	14.8309	15.0619	14.7724	0.00224	0.00116	81487.7	6	9	7	7	7	4	5	4
EIF4H	Eukaryotic translation initiation factor 4H	Q15056	Q15056	-		+	2.53951	-0.786856	-4.83779	18.0677	18.0997	18.2018	17.8522	18.2396	16.9539	17.5818	17.3804	7.04e-06	3.31e-05	27385.1	5	5	5	4	6	3	4	4
YWHAH	14-3-3 protein eta	Q04917	Q04917	-		+	3.37164	-0.784791	-6.99549	18.8738	18.597	18.4487	18.5649	18.4401	17.8318	17.8752	17.6933	2.12e-05	3.89e-05	28218.7	13	13	13	14	13	12	11	13
GOSR2	Golgi SNAP receptor complex member 2;Isoform B of Golgi SNAP receptor complex member 2	O14653;O14653-2	O14653;O14653-2	-		+	4.05252	-0.784676	-9.27884	16.7131	16.7597	16.8662	16.6643	16.7146	16.0742	16.0376	15.7649	0.000271	0.000206	24775.4;24775.4-2	7	6	6	7	6	5	5	7
RNH1	Ribonuclease inhibitor	P13489	P13489	-		+	2.85628	-0.784545	-5.59106	19.9374	19.3804	19.9524	19.8418	19.775	18.9874	19.0374	18.9537	1.35e-05	3.43e-05	49973.5	20	20	20	20	20	18	18	17
KRAS	Isoform 2B of GTPase KRas	P01116-2	P01116-2	-		+	3.48828	-0.783597	-7.34887	16.2856	16.3297	16.6596	16.6203	16.4222	15.6839	15.7602	15.5955	0.00105	0.00063	21424.5	3	4	4	4	3	2	3	1
CACNA2D1	Voltage-dependent calcium channel subunit alpha-2/delta-1;Isoform 4 of Voltage-dependent calcium channel subunit alpha-2/delta-1;Isoform 5 of Voltage-dependent calcium channel subunit alpha-2/delta-1	P54289;P54289-4;P54289-5	P54289;P54289-4;P54289-5	-		+	3.52143	-0.78217	-7.45194	16.7677	16.7774	16.7768	16.864	16.4322	16.0215	15.8697	15.9332	7.14e-06	3.31e-05	124568.03;124568.03-4;124568.03-5	13	12	14	13	11	8	10	12
ACBD5	Isoform 2 of Acyl-CoA-binding domain-containing protein 5;Isoform 3 of Acyl-CoA-binding domain-containing protein 5	Q5T8D3-2;Q5T8D3-3	Q5T8D3-2;Q5T8D3-3	-		+	3.63388	-0.781635	-7.81061	16.2935	16.3401	16.1527	16.4709	16.402	15.5456	15.7179	15.387	0.00011	0.000102	54785.7;58977.5	6	7	6	7	8	4	4	4
KIF1B	Kinesin-like protein KIF1B;Isoform 2 of Kinesin-like protein KIF1B;Isoform 4 of Kinesin-like protein KIF1B	O60333;O60333-2;O60333-4	O60333;O60333-2;O60333-4	mito-interacting		+	1.74945	-0.780099	-3.23469	16.9015	16.4448	16.1622	15.89	16.6682	15.7162	15.5545	15.629	1.18e-05	3.36e-05	204476.31;204476.31-2;204476.31-4	9	9	3	4	9	3	5	6
RRAS	Ras-related protein R-Ras	P10301	P10301	-		+	5.20804	-0.779292	-14.7128	18.199	18.4118	18.3922	18.2729	18.3107	17.5477	17.5541	17.5123	5.57e-06	3.26e-05	23480.5	10	9	9	9	10	8	9	7
PLEKHO2	Pleckstrin homology domain-containing family O member 2	Q8TD55	Q8TD55	-		+	2.31846	-0.777459	-4.35369	16.4168	17.0638	16.8893	16.8362	16.8425	16.1742	15.736	16.1865	9.07e-05	8.92e-05	53349.9	4	7	5	5	8	4	4	4
ACOX3	Peroxisomal acyl-coenzyme A oxidase 3;Isoform 2 of Peroxisomal acyl-coenzyme A oxidase 3	O15254;O15254-2	O15254;O15254-2	-		+	2.92319	-0.777038	-5.76014	16.2139	16.3014	16.553	16.0411	16.1358	15.5356	15.5922	15.2882	0.000427924	0.000303437	77629.08;77629.08-2	8	9	10	7	7	4	3	3
HBD;HBB	Hemoglobin subunit delta;Hemoglobin subunit beta	P02042;P68871	P02042;P68871	-			0.860607	-0.776941	-1.76493	18.2195	16.616	17.5302	NaN	17.7865	16.8808	16.3384	17.064	0.00011	0.000102	15998.4;16055.47	2	1	2	NaN	2	2	1	1
PPP1R11	E3 ubiquitin-protein ligase PPP1R11	O60927	O60927	-		+	1.69678	-0.776832	-3.13869	15.5931	15.4283	15.4582	14.6593	15.2975	14.1989	14.6095	14.7229	3.91e-05	5.13e-05	13952.5	3	3	3	3	3	2	3	2
CD2BP2	CD2 antigen cytoplasmic tail-binding protein 2	O95400	O95400	-		+	2.72088	-0.776639	-5.2599	16.8966	16.5719	16.418	16.5635	16.8275	15.6987	16.1049	15.8329	0.000864002	0.000532616	37646.5	5	6	6	5	6	3	4	2
RAD23A	UV excision repair protein RAD23 homolog A;Isoform 2 of UV excision repair protein RAD23 homolog A;Isoform 3 of UV excision repair protein RAD23 homolog A	P54725;P54725-2;P54725-3	P54725;P54725-2;P54725-3	-		+	3.85941	-0.775032	-8.57427	17.7401	17.6509	17.8093	17.7005	17.5849	17.0612	16.7227	16.9825	4.98e-05	5.95e-05	39609.2;39609.2-2;39609.2-3	4	4	3	3	4	1	2	2
ANKLE2	Ankyrin repeat and LEM domain-containing protein 2	Q86XL3	Q86XL3	-		+	2.37146	-0.773776	-4.46691	16.3414	16.4349	16.0952	15.7695	16.3436	15.5764	15.4182	15.2749	2.19e-05	3.95e-05	104114	12	11	9	6	12	4	7	3
RNF170	E3 ubiquitin-protein ligase RNF170	Q96K19	Q96K19	-		+	3.44702	-0.772995	-7.22224	15.9693	16.2351	16.3653	16.2526	16.0022	15.3058	15.4463	15.4235	4.21e-06	3.26e-05	29814.7	4	4	4	4	4	3	3	3
NUBP2	Cytosolic Fe-S cluster assembly factor NUBP2	Q9Y5Y2	Q9Y5Y2	-		+	2.84016	-0.772489	-5.55089	17.1932	17.3978	17.133	17.0499	17.1499	16.7288	16.2474	16.2606	0.000573	0.000384	28825.3	6	5	5	5	5	3	5	4
PSMD14	26S proteasome non-ATPase regulatory subunit 14	O00487	O00487	-		+	5.81227	-0.771634	-18.6355	17.0426	17.1377	17.0861	17.0017	17.0151	16.2305	16.3473	16.2772	2.07e-05	3.86e-05	34577	8	8	8	8	8	6	7	6
NAP1L4	Nucleosome assembly protein 1-like 4;Isoform 2 of Nucleosome assembly protein 1-like 4	Q99733;Q99733-2	Q99733;Q99733-2	-		+	2.87632	-0.771387	-5.64132	17.9329	17.9128	17.5752	17.619	17.8859	16.9253	17.2563	16.8597	4.43e-05	5.54e-05	42823.45;42823.45-2	11	11	11	10	11	10	10	9
CAPG	Macrophage-capping protein	P40121	P40121	-		+	2.259	-0.77083	-4.22869	18.8727	18.5136	19.0781	18.3466	18.4794	17.8681	17.8747	17.919	1.78e-05	3.63e-05	38498.5	10	10	10	8	10	7	8	8
PPP1R10	Serine/threonine-protein phosphatase 1 regulatory subunit 10	Q96QC0	Q96QC0	-		+	5.19205	-0.77071	-14.6205	16.6662	16.6859	16.5664	16.5906	16.6482	15.8159	15.9777	15.7886	0.000459118	0.000322043	99057.7	6	7	5	7	7	3	4	4
SCO2	Protein SCO2 homolog, mitochondrial	O43819	O43819	+	CIV assembly factors;Complex IV;Copper metabolism;Metabolism;Metals and cofactors;OXPHOS;OXPHOS assembly factors	+	1.46071	-0.770592	-3.68581	16.0462	NaN	15.8439	NaN	NaN	15.1272	15.4564	14.9396	0.0210419	0.00848099	29809.9	2	NaN	1	NaN	NaN	1	2	1
RBBP7	Histone-binding protein RBBP7	Q16576	Q16576	-		+	2.50676	-0.769254	-4.76405	16.773	16.4104	16.2989	16.2864	16.7285	15.9353	15.696	15.5592	1.99e-05	3.77e-05	47820.1	8	8	7	9	8	5	5	5
P4HTM	Transmembrane prolyl 4-hydroxylase;Isoform 3 of Transmembrane prolyl 4-hydroxylase	Q9NXG6;Q9NXG6-3	Q9NXG6;Q9NXG6-3	-		+	2.78132	-0.767263	-5.40595	17.1227	17.5145	17.1338	17.5129	17.0753	16.5916	16.3653	16.5568	1.81e-05	3.64e-05	56660.94;56660.94-3	2	4	4	5	5	1	4	3
STXBP6	Syntaxin-binding protein 6;Isoform 2 of Syntaxin-binding protein 6	Q8NFX7;Q8NFX7-2	Q8NFX7;Q8NFX7-2	-			0.70453	-0.765806	-1.48586	16.731	17.0526	15.2848	16.5735	16.6733	15.5681	NaN	15.8263	0.00300289	0.00135627	23553.82;23553.82-2	6	1	1	1	6	2	NaN	1
UBA7	Ubiquitin-like modifier-activating enzyme 7	P41226	P41226	-		+	2.2494	-0.764372	-4.20871	16.597	17.0352	17.2205	16.584	16.7637	16.2626	16.0342	15.9302	9.62e-05	9.3e-05	111694	11	10	15	9	12	5	6	7
RAPH1	Ras-associated and pleckstrin homology domains-containing protein 1	Q70E73	Q70E73	-		+	2.20782	-0.763846	-4.12278	16.0698	16.3932	16.834	16.211	16.6126	15.7251	15.6749	15.581	0.00140177	0.000796733	135256	12	12	13	8	10	4	5	3
TUT7	Terminal uridylyltransferase 7;Isoform 6 of Terminal uridylyltransferase 7	Q5VYS8;Q5VYS8-6	Q5VYS8;Q5VYS8-6	-		+	2.85371	-0.763238	-5.58467	16.3801	16.0498	15.9762	15.8736	15.8163	15.2317	15.1849	15.3513	0.000143523	0.000123654	171229.24;171229.24-6	3	4	4	3	3	3	2	5
ARPC3	Actin-related protein 2/3 complex subunit 3	O15145	O15145	-		+	3.0378	-0.763081	-6.05846	18.4607	18.3656	18.3983	17.948	18.3905	17.4896	17.6112	17.5478	1.6e-06	3.26e-05	20546.7	9	7	7	8	8	8	8	8
PSMA5	Proteasome subunit alpha type-5	P28066	P28066	-		+	3.72274	-0.76238	-8.10424	18.2742	18.6049	18.5548	18.6184	18.4138	17.6374	17.7887	17.7664	2.08e-05	3.86e-05	26411	11	11	10	11	12	8	8	8
LPXN	Leupaxin;Isoform 2 of Leupaxin	O60711;O60711-2	O60711;O60711-2	-			1.27033	-0.760878	-2.39496	17.6517	16.9115	17.4263	16.2783	17.0851	16.4012	16.212	16.3159	1.81e-05	3.64e-05	43332.02;43332.02-2	9	9	9	9	9	7	7	7
PCDHGA4	Protocadherin gamma-A4	Q9Y5G9	Q9Y5G9	-		+	1.85463	-0.759401	-3.42974	17.4847	17.2358	16.9322	16.6259	17.4666	16.4695	16.3377	16.3617	5.85e-05	6.56e-05	103968	2	2	2	2	2	2	2	1
RECK	Reversion-inducing cysteine-rich protein with Kazal motifs	O95980	O95980	-			1.24013	-0.759075	-2.34402	16.8507	16.5402	16.9846	15.6089	16.6735	15.7642	15.7531	15.8002	5.28e-06	3.26e-05	106457	25	21	21	13	24	17	15	16
DUSP12	Dual specificity protein phosphatase 12	Q9UNI6	Q9UNI6	-		+	1.66495	-0.758851	-3.29351	15.4437	15.8028	15.0038	15.1496	15.4265	14.5877	NaN	14.6252	0.00297566	0.00134943	37687.3	5	3	3	3	4	2	NaN	1
SPIRE1	Protein spire homolog 1;Isoform 2 of Protein spire homolog 1	Q08AE8;Q08AE8-2	Q08AE8;Q08AE8-2	+	Fission;Mitochondrial dynamics and surveillance;Organelle contact sites		0.732366	-0.758632	-1.53575	15.8585	14.5437	15.828	15.9993	14.9792	14.4722	NaN	14.894	0.00230228	0.0011773	85543.64;85543.64-2	1	2	1	2	2	1	NaN	1
SPATA5	ATPase family protein 2 homolog	Q8NB90	Q8NB90	-		+	2.29388	-0.757999	-4.75477	16.1859	16.3169	15.912	16.0839	15.821	15.4062	NaN	15.2057	0.00288109	0.00133315	97904.4	1	2	4	4	2	2	NaN	3
PTAR1	Protein prenyltransferase alpha subunit repeat-containing protein 1	Q7Z6K3	Q7Z6K3	-		+	2.10496	-0.756701	-4.2814	15.7836	15.4941	15.2304	15.665	15.7737	NaN	14.8949	14.7705	0.00309	0.00138	46405.1	3	3	1	3	3	NaN	1	1
BTAF1	TATA-binding protein-associated factor 172	O14981	O14981	-		+	2.59608	-0.75494	-4.96692	15.7094	16.1859	15.996	16.0179	16.2938	15.0973	15.4479	15.3117	0.00319413	0.00141424	206887	5	5	3	4	3	5	2	6
NAA30	N-alpha-acetyltransferase 30;Isoform 2 of N-alpha-acetyltransferase 30	Q147X3;Q147X3-2	Q147X3;Q147X3-2	-		+	1.53734	-0.754543	-3.03192	17.4713	16.707	17.221	17.1815	17.3877	NaN	16.2272	16.6512	0.002723	0.00130226	39319.52;39319.52-2	4	4	3	3	4	NaN	2	2
COPZ2	Coatomer subunit zeta-2	Q9P299	Q9P299	-		+	2.5808	-0.75451	-4.93181	16.9919	17.2278	17.4674	17.5315	16.9904	16.5102	16.506	16.4456	3.49e-05	4.88e-05	23548	6	7	7	7	6	6	6	5
IRF2BP2	Interferon regulatory factor 2-binding protein 2;Isoform 2 of Interferon regulatory factor 2-binding protein 2	Q7Z5L9;Q7Z5L9-2	Q7Z5L9;Q7Z5L9-2	-		+	1.59807	-0.754421	-2.96159	16.1232	15.8622	15.6428	15.0354	15.9886	15.0009	14.9656	14.9615	4.97e-05	5.94e-05	61024.63;61024.63-2	6	6	6	3	7	4	4	3
GPN1	GPN-loop GTPase 1;Isoform 2 of GPN-loop GTPase 1;Isoform 3 of GPN-loop GTPase 1;Isoform 4 of GPN-loop GTPase 1;Isoform 5 of GPN-loop GTPase 1	Q9HCN4;Q9HCN4-2;Q9HCN4-3;Q9HCN4-4;Q9HCN4-5	Q9HCN4;Q9HCN4-2;Q9HCN4-3;Q9HCN4-4;Q9HCN4-5	-		+	2.36449	-0.754114	-4.45193	17.0876	16.6845	16.7895	16.6706	16.8224	15.8471	15.8934	16.43	0.00220789	0.00114454	41740.11;41740.11-2;41740.11-3;41740.11-4;41740.11-5	2	3	2	2	2	2	3	2
MRPL46	39S ribosomal protein L46, mitochondrial	Q9H2W6	Q9H2W6	+	LSU;Mitochondrial central dogma;Mitochondrial ribosome;Translation	+	2.52369	-0.75344	-4.80208	16.4495	16.4608	16.362	16.3526	16.4748	15.999	15.2792	15.7213	0.00145487	0.000821129	31705.1	3	3	3	3	3	2	2	3
BET1L	BET1-like protein	Q9NYM9	Q9NYM9	-			1.01673	-0.752955	-2.04527	17.0862	16.3683	NaN	16.6584	16.0056	15.1814	16.0347	16.1139	0.00326684	0.00144084	12388.1	2	2	NaN	2	2	1	1	2
RALGPS2	Ras-specific guanine nucleotide-releasing factor RalGPS2;Isoform 3 of Ras-specific guanine nucleotide-releasing factor RalGPS2	Q86X27;Q86X27-3	Q86X27;Q86X27-3	-		+	2.3722	-0.75162	-4.46849	15.6392	15.6875	15.0785	15.4511	15.1911	14.5767	14.7968	14.6001	0.00263184	0.00127929	65167.11;65167.11-3	8	7	6	9	7	5	3	2
MSRA	Mitochondrial peptide methionine sulfoxide reductase;Isoform 2 of Mitochondrial peptide methionine sulfoxide reductase;Isoform 3 of Mitochondrial peptide methionine sulfoxide reductase;Isoform 4 of Mitochondrial peptide methionine sulfoxide reductase;Isoform 5 of Mitochondrial peptide methionine sulfoxide reductase	Q9UJ68;Q9UJ68-2;Q9UJ68-3;Q9UJ68-4;Q9UJ68-5	Q9UJ68;Q9UJ68-2;Q9UJ68-3;Q9UJ68-4;Q9UJ68-5	+	Detoxification;Metabolism;ROS and glutathione metabolism;Sulfur metabolism	+	2.13573	-0.750167	-3.97607	16.8289	16.6483	16.6671	16.369	16.3552	16.1816	15.5047	15.7843	0.00294	0.00134	26132.47;26132.47-2;26132.47-3;26132.47-4;26132.47-5	2	3	2	3	2	1	3	2
AKR1B1	Aldo-keto reductase family 1 member B1	P15121	P15121	-		+	2.08744	-0.749709	-3.8794	17.8316	18.1576	18.0325	18.7036	18.1279	17.4171	17.4296	17.4162	1.37e-05	3.43e-05	35853.4	16	17	17	18	17	16	16	16
GIT1	ARF GTPase-activating protein GIT1;Isoform 3 of ARF GTPase-activating protein GIT1	Q9Y2X7;Q9Y2X7-3	Q9Y2X7;Q9Y2X7-3	-		+	2.69388	-0.744567	-5.19554	15.8751	15.9691	15.7804	15.3617	15.775	15.108	14.9528	14.9622	5.51e-05	6.31e-05	84340.98;84340.98-3	9	9	5	7	9	4	3	2
LRRC47	Leucine-rich repeat-containing protein 47	Q8N1G4	Q8N1G4	-		+	6.11691	-0.742102	-20.9795	17.6261	17.6005	17.6619	17.6359	17.5719	16.888	16.8041	16.9394	2.1e-06	3.26e-05	63472.9	15	15	15	15	13	14	15	13
SESTD1	SEC14 domain and spectrin repeat-containing protein 1	Q86VW0	Q86VW0	-		+	1.62377	-0.739728	-3.00738	16.0995	15.9361	15.8377	15.723	15.1969	15.3927	14.819	14.8451	0.00155213	0.000866613	79348.3	4	2	3	2	2	2	2	2
COMMD2	COMM domain-containing protein 2;Isoform 2 of COMM domain-containing protein 2	Q86X83;Q86X83-2	Q86X83;Q86X83-2	-		+	3.2636	-0.739199	-6.68054	17.239	17.1137	17.4172	17.167	16.9931	16.3055	16.5835	16.4515	7.22e-05	7.57e-05	22745.13;22745.13-2	3	3	4	3	4	2	4	2
SPTAN1	Isoform 3 of Spectrin alpha chain, non-erythrocytic 1	Q13813-3	Q13813-3	-		+	3.85206	-0.738203	-8.54842	17.9969	18.0073	18.0308	17.6926	18.0069	17.1905	17.2489	17.1867	2.24e-06	3.26e-05	282282	128	129	128	124	134	116	120	117
PNPO	Pyridoxine-5'-phosphate oxidase;Isoform 3 of Pyridoxine-5'-phosphate oxidase	Q9NVS9;Q9NVS9-3	Q9NVS9;Q9NVS9-3	+	Metabolism;Vitamin B6 metabolism;Vitamin metabolism	+	3.27227	-0.735676	-6.7054	16.7007	16.4808	16.8874	16.8235	16.5965	15.8355	16.0591	15.9917	0.000167581	0.00013995	29987.99;29987.99-3	5	6	7	6	6	6	5	4
NPM3	Nucleoplasmin-3	O75607	O75607	-		+	4.31134	-0.731021	-10.3036	17.3622	17.2215	17.2618	17.098	17.3566	16.6043	16.4736	16.5091	2.54e-05	4.24e-05	19343.7	2	2	2	2	2	2	2	2
YES1	Tyrosine-protein kinase Yes	P07947	P07947	-		+	1.39068	-0.729242	-2.59979	16.7516	16.0178	15.8728	15.566	16.437	15.3593	15.4716	15.3685	0.000199146	0.000160248	60801.2	3	1	1	1	3	3	2	1
RBM14	RNA-binding protein 14	Q96PK6	Q96PK6				0.986954	-0.728791	-1.92151	17.5593	17.4441	17.107	15.9915	17.3325	16.4161	16.3602	16.298	1.72e-06	3.26e-05	69491.6	16	18	16	13	17	16	16	15
CDC5L	Cell division cycle 5-like protein	Q99459	Q99459	-		+	5.69991	-0.728412	-17.8368	16.8467	16.7822	16.7913	16.6957	16.8598	16.0348	16.0952	16.0703	3.52e-05	4.9e-05	92250.6	15	16	14	13	15	13	13	13
NOMO1	Nodal modulator 1	Q15155	Q15155	-		+	1.77281	-0.727963	-3.27762	15.777	14.9449	15.3923	15.2189	14.8765	14.6191	14.5211	14.4017	7.04e-05	7.4e-05	134324	2	2	2	2	2	2	2	2
EMC4	ER membrane protein complex subunit 4;Isoform 2 of ER membrane protein complex subunit 4;Isoform 3 of ER membrane protein complex subunit 4	Q5J8M3;Q5J8M3-2;Q5J8M3-3	Q5J8M3;Q5J8M3-2;Q5J8M3-3	-		+	4.70642	-0.726722	-12.0674	17.6164	17.5352	17.5773	17.4759	17.5348	16.8903	16.8929	16.6804	0.00284856	0.00132835	20086.59;20086.59-2;20086.59-3	2	3	2	3	2	1	3	2
RAB29	Ras-related protein Rab-7L1	O14966	O14966	-		+	2.84617	-0.726519	-5.56584	19.1621	19.3013	18.9174	18.8659	18.789	18.3198	18.2207	18.3014	3.7e-05	5e-05	23155.2	2	3	3	3	4	2	2	3
DDAH1	N(G),N(G)-dimethylarginine dimethylaminohydrolase 1	O94760	O94760	-		+	2.92421	-0.726297	-5.76273	17.6544	17.6281	17.1948	17.2861	17.486	16.8114	16.666	16.6933	1.67e-06	3.26e-05	31121.8	14	14	13	13	13	14	10	12
VBP1	Prefoldin subunit 3	P61758	P61758	-		+	4.98886	-0.726025	-13.4958	17.5427	17.5119	17.5617	17.5639	17.4753	16.8854	16.8578	16.6721	7.54e-06	3.32e-05	22625.9	10	10	10	9	9	7	9	8
NUB1	NEDD8 ultimate buster 1;Isoform 2 of NEDD8 ultimate buster 1	Q9Y5A7;Q9Y5A7-2	Q9Y5A7;Q9Y5A7-2	-		+	2.40331	-0.725686	-4.53579	15.0201	15.5598	15.4428	15.1955	15.375	14.3399	14.7931	14.646	0.00316866	0.00140536	70538.15;70538.15-2	4	4	7	8	6	2	3	3
RACGAP1	Rac GTPase-activating protein 1	Q9H0H5	Q9H0H5	-			1.11265	-0.725136	-2.13054	15.8324	15.4861	15.6765	15.9954	15.9909	15.8105	14.3182	15.0847	0.00307288	0.00137591	71026.5	3	2	2	3	5	2	2	2
RAB1B	Ras-related protein Rab-1B	Q9H0U4	Q9H0U4	-		+	4.27629	-0.725105	-10.1591	18.5772	18.5174	18.2843	18.4027	18.3829	17.7392	17.6575	17.7267	3.32e-05	4.78e-05	22171.2	5	4	5	5	6	4	4	4
PDCD4	Programmed cell death protein 4;Isoform 2 of Programmed cell death protein 4	Q53EL6;Q53EL6-2	Q53EL6;Q53EL6-2	-		+	2.22365	-0.724955	-4.15537	16.9771	17.2067	17.1356	16.5461	17.2755	16.3344	16.3136	16.2617	0.000363318	0.000264356	51735.25;51735.25-2	8	11	10	7	9	4	6	5
NEK7	Serine/threonine-protein kinase Nek7	Q8TDX7	Q8TDX7	-		+	2.11446	-0.724769	-3.93335	18.0681	18.4232	18.8151	18.5154	18.8022	17.8253	17.768	17.8067	1.65e-06	3.26e-05	34550.9	12	13	14	13	13	12	12	12
APPL2	DCC-interacting protein 13-beta	Q8NEU8	Q8NEU8	-		+	4.0987	-0.724723	-9.4547	17.303	17.4593	17.5569	17.3142	17.446	16.7236	16.5781	16.7718	3.12e-06	3.26e-05	74493.3	26	24	23	23	23	20	21	19
USP10	Ubiquitin carboxyl-terminal hydrolase 10;Isoform 2 of Ubiquitin carboxyl-terminal hydrolase 10;Isoform 3 of Ubiquitin carboxyl-terminal hydrolase 10	Q14694;Q14694-2;Q14694-3	Q14694;Q14694-2;Q14694-3	-		+	1.95794	-0.724185	-3.62607	16.9038	16.4564	16.1243	16.1737	16.6437	15.6244	15.8402	15.744	0.000153	0.00013	87133.79;87133.79-2;87133.79-3	13	11	10	12	13	8	8	10
HSPB1	Heat shock protein beta-1	P04792	P04792	-		+	3.23609	-0.722157	-6.6022	19.701	19.67	19.9139	19.9325	20.0984	19.2152	19.1011	19.1067	1.27e-05	3.37e-05	22782.5	15	16	16	16	16	13	13	13
UBA1	Ubiquitin-like modifier-activating enzyme 1;Isoform 2 of Ubiquitin-like modifier-activating enzyme 1	P22314;P22314-2	P22314;P22314-2	-		+	3.55582	-0.722145	-7.56014	18.6315	18.9877	18.8896	18.676	18.9236	18.1262	18.0574	18.1149	2.4e-06	3.26e-05	117849;117849-2	39	39	39	39	41	38	37	39
NT5E	5'-nucleotidase	P21589	P21589	-		+	2.9264	-0.721235	-5.76834	18.9931	18.7287	18.6022	18.5967	19.0303	18.0867	18.0568	18.0634	1.05e-05	3.35e-05	63367.7	20	19	18	19	21	17	16	19
ANKRD17	Ankyrin repeat domain-containing protein 17;Isoform 2 of Ankyrin repeat domain-containing protein 17;Isoform 7 of Ankyrin repeat domain-containing protein 17	O75179;O75179-2;O75179-7	O75179;O75179-2;O75179-7	-		+	2.63574	-0.721189	-5.05878	16.3373	16.0175	16.15	15.9382	16.0287	15.6639	15.2782	15.1773	0.00160001	0.000888053	274257.91;274257.91-2;274257.91-7	11	9	10	9	8	5	9	8
TNKS1BP1	182 kDa tankyrase-1-binding protein	Q9C0C2	Q9C0C2	-		+	1.68757	-0.721034	-3.12203	17.1784	17.3119	17.498	16.4898	17.257	16.4271	16.3769	16.474	3.1e-06	3.26e-05	181796	53	54	53	40	53	11	16	14
BAG2	BAG family molecular chaperone regulator 2	O95816	O95816	-		+	2.66442	-0.720641	-5.12594	17.9084	18.2507	18.1159	17.6353	17.8871	17.2464	17.2322	17.2378	8.7e-06	3.33e-05	23771.9	11	11	11	10	11	10	9	8
RTL8C	Retrotransposon Gag-like protein 8C	A6ZKI3	A6ZKI3	-		+	1.34903	-0.720614	-2.52853	16.1882	16.1446	15.7338	15.3922	16.074	14.6934	15.646	15.2185	1.03e-06	3.26e-05	13171.1	4	4	3	3	4	2	3	2
MAP2K3	Dual specificity mitogen-activated protein kinase kinase 3;Isoform 1 of Dual specificity mitogen-activated protein kinase kinase 3;Isoform 2 of Dual specificity mitogen-activated protein kinase kinase 3	P46734;P46734-2;P46734-3	P46734;P46734-2;P46734-3	-		+	1.66884	-0.720613	-3.08822	18.2057	17.9079	17.4609	17.3712	18.0244	17.1512	17.2323	16.8368	2.67e-05	4.31e-05	39318.38;39318.38-2;39318.38-3	13	12	12	12	13	10	12	11
CD44	CD44 antigen;Isoform 10 of CD44 antigen;Isoform 11 of CD44 antigen;Isoform 12 of CD44 antigen;Isoform 13 of CD44 antigen;Isoform 14 of CD44 antigen;Isoform 16 of CD44 antigen;Isoform 17 of CD44 antigen;Isoform 18 of CD44 antigen;Isoform 3 of CD44 antigen;Isoform 4 of CD44 antigen;Isoform 5 of CD44 antigen;Isoform 6 of CD44 antigen;Isoform 7 of CD44 antigen;Isoform 8 of CD44 antigen	P16070;P16070-10;P16070-11;P16070-12;P16070-13;P16070-14;P16070-16;P16070-17;P16070-18;P16070-3;P16070-4;P16070-5;P16070-6;P16070-7;P16070-8	P16070;P16070-10;P16070-11;P16070-12;P16070-13;P16070-14;P16070-16;P16070-17;P16070-18;P16070-3;P16070-4;P16070-5;P16070-6;P16070-7;P16070-8	-		+	2.1079	-0.7206	-3.92021	19.4334	18.9739	18.5791	18.8688	18.945	18.2246	18.216	18.2777	8.49e-06	3.33e-05	81537.62;81537.62-10;81537.62-11;81537.62-12;81537.62-13;81537.62-14;81537.62-16;81537.62-17;81537.62-18;81537.62-3;81537.62-4;81537.62-5;81537.62-6;81537.62-7;81537.62-8	9	9	9	9	9	9	9	9
CBX3	Chromobox protein homolog 3	Q13185	Q13185	-		+	4.39482	-0.720149	-10.6552	17.5419	17.4701	17.288	17.3609	17.5341	16.6838	16.7313	16.7414	2.78e-05	4.41e-05	20811.4	7	7	7	7	7	7	6	7
QRICH1	Glutamine-rich protein 1	Q2TAL8	Q2TAL8	-		+	4.34697	-0.719534	-10.4524	15.8097	15.7092	15.5205	15.7215	15.7385	14.9872	14.918	15.0358	0.00290525	0.00133719	86435.6	5	5	3	3	2	2	1	2
HGFAC	Hepatocyte growth factor activator	Q04756	Q04756	-		+	3.28796	-0.719242	-10.2266	16.4339	NaN	NaN	16.4884	16.4382	15.8012	15.598	15.8035	5.2e-05	6.05e-05	70681.8	2	NaN	NaN	4	3	2	1	1
LDHA	L-lactate dehydrogenase A chain	P00338	P00338	-		+	2.96835	-0.718926	-5.87636	20.2914	20.3974	20.0278	19.8861	20.1644	19.4748	19.4169	19.4118	1.63e-05	3.55e-05	36688.7	22	24	24	23	24	21	22	22
CAPNS1	Calpain small subunit 1	P04632	P04632	-		+	2.74546	-0.718719	-5.31897	19.494	19.6458	19.3797	19.1784	19.1364	18.5663	18.7684	18.6097	1.48e-05	3.47e-05	28315.7	9	10	9	8	10	8	8	8
ANXA7	Annexin A7;Isoform 2 of Annexin A7	P20073;P20073-2	P20073;P20073-2	-		+	4.40462	-0.715122	-10.6972	18.5319	18.5813	18.7001	18.4934	18.407	17.7862	17.8331	17.8635	1.9e-05	3.68e-05	52739.24;52739.24-2	15	15	16	15	15	11	13	12
USP13	Ubiquitin carboxyl-terminal hydrolase 13	Q92995	Q92995	-		+	4.18102	-0.71342	-9.77555	15.9421	16.183	15.9197	16.0303	15.9232	15.2153	15.3555	15.288	0.00046	0.000323	97327.1	2	3	3	4	6	1	4	2
NR3C1	Glucocorticoid receptor;Isoform Beta of Glucocorticoid receptor	P04150;P04150-2	P04150;P04150-2	-		+	1.48997	-0.712809	-2.77143	16.4116	16.1717	16.1901	15.337	15.9659	15.1732	15.2177	15.5164	1.52e-05	3.47e-05	85659.29;85659.29-2	11	13	13	4	13	6	6	5
CALU	Calumenin;Isoform 3 of Calumenin	O43852;O43852-3	O43852;O43852-3	-		+	3.64088	-0.712628	-7.83342	18.9323	19.0574	19.0705	18.6981	18.9108	18.2662	18.1982	18.1991	1.79e-06	3.26e-05	37106.78;37106.78-3	25	22	24	23	27	22	20	23
GSDMD	Gasdermin-D	P57764	P57764	-		+	1.30774	-0.712344	-2.4583	16.0523	16.9637	17.1229	16.1567	16.4705	15.694	15.868	15.9605	0.000797105	0.00049899	52801	3	7	7	3	4	1	2	2
STAT5B	Signal transducer and activator of transcription 5B	P51692	P51692	-		+	3.39175	-0.710881	-7.05538	15.9305	15.8093	16.0515	15.7212	15.963	15.3464	15.1616	15.0446	0.00189124	0.00102017	89865.9	7	7	8	8	5	2	4	2
B3GALT6	Beta-1,3-galactosyltransferase 6	Q96L58	Q96L58	-		+	3.04808	-0.710828	-6.08575	15.662	15.3957	15.3348	15.6704	15.4873	14.6157	14.9612	14.8207	0.00108224	0.000644254	37137.6	3	4	4	3	4	1	4	3
MAPRE1	Microtubule-associated protein RP/EB family member 1	Q15691	Q15691	-		+	2.5737	-0.710452	-4.91555	17.9953	17.8551	17.6917	17.5271	18.0584	17.1136	16.9673	17.2643	5.78e-05	6.53e-05	29999.1	10	10	10	10	11	6	9	7
BCL2L13	Bcl-2-like protein 13	Q9BXK5	Q9BXK5	+	Apoptosis;Autophagy;Mitochondrial dynamics and surveillance;Mitophagy	+	2.69427	-0.710372	-5.19647	17.0857	17.0666	16.7521	16.6429	16.7533	15.9845	16.2846	16.1801	0.000271146	0.000206403	52723.2	6	6	3	3	6	2	1	2
ANXA11	Annexin A11;Isoform 2 of Annexin A11	P50995;P50995-2	P50995;P50995-2	-		+	2.77952	-0.710037	-5.40158	19.3626	18.9601	18.9959	18.8117	18.8489	18.3198	18.2428	18.2949	2.15e-06	3.26e-05	54389.71;54389.71-2	23	23	22	22	23	20	21	22
ZER1	Protein zer-1 homolog	Q7Z7L7	Q7Z7L7	-		+	3.31401	-0.709369	-8.02667	16.0517	16.0217	16.1923	15.9356	16.1177	NaN	15.4493	15.2595	0.00227961	0.00116979	88169.5	2	1	1	1	1	NaN	1	3
GGA3	ADP-ribosylation factor-binding protein GGA3;Isoform 4 of ADP-ribosylation factor-binding protein GGA3	Q9NZ52;Q9NZ52-4	Q9NZ52;Q9NZ52-4	-		+	3.0325	-0.708201	-6.04441	15.0953	14.9142	14.8336	14.6845	14.9003	14.1404	14.0167	14.3751	0.00405	0.00176	78315.34;78315.34-4	3	3	1	1	3	1	1	1
MTDH	Protein LYRIC	Q86UE4	Q86UE4	-		+	4.68795	-0.707593	-11.979	17.1825	17.07	17.1181	17.0954	17.174	16.4253	16.2963	16.5397	7.83e-06	3.32e-05	63837	20	17	21	20	20	16	15	14
NCAPH	Condensin complex subunit 2	Q15003	Q15003	-		+	2.15606	-0.707032	-4.01715	16.0787	15.9517	15.719	15.9186	16.1562	15.036	15.0839	15.6536	0.00247	0.00124	82563.2	6	6	2	4	5	1	3	4
LARP6	La-related protein 6	Q9BRS8	Q9BRS8	-		+	3.09125	-0.705807	-6.20147	16.2844	16.1234	16.3502	16.1991	15.9114	15.4665	15.5917	15.3454	8.39e-05	8.46e-05	54736.7	6	4	5	2	5	3	2	4
SVIL	Supervillin;Isoform 2 of Supervillin;Isoform SV3 of Supervillin;Isoform SV4 of Supervillin	O95425;O95425-2;O95425-3;O95425-4	O95425;O95425-2;O95425-3;O95425-4	-			1.00854	-0.705164	-1.95737	15.9612	16.2629	15.0967	15.2595	14.9698	14.909	15.0249	14.4807	0.0003143	0.000234603	247746.35;247746.35-2;247746.35-3;247746.35-4	8	14	2	4	4	1	1	2
PLEC	Plectin	Q15149	Q15149	-		+	2.97418	-0.704584	-5.89147	18.9467	19.19	19.0566	18.8762	19.3748	18.3864	18.4178	18.3486	2.39e-06	3.26e-05	531791	273	271	273	264	288	255	261	263
SPATA5L1	Spermatogenesis-associated protein 5-like protein 1	Q9BVQ7	Q9BVQ7	-		+	1.57264	-0.699808	-2.91653	16.2239	15.7784	16.2315	16.1868	15.7819	14.8481	15.7553	15.4186	0.00211552	0.00111197	80710.3	4	4	3	6	4	3	2	5
NDUFA2	NADH dehydrogenase [ubiquinone] 1 alpha subcomplex subunit 2	O43678	O43678	+	CI subunits;Complex I;OXPHOS;OXPHOS subunits	+	3.18024	-0.699525	-6.44536	17.5162	17.7041	17.6136	17.2982	17.336	16.712	16.8446	16.8257	5.76e-05	6.52e-05	10921.6	3	3	3	3	3	3	3	3
ARHGAP18	Rho GTPase-activating protein 18	Q8N392	Q8N392	-		+	1.49693	-0.699231	-2.78355	17.0978	16.3795	16.0231	16.1443	16.3321	15.7743	15.6304	15.6837	4.56e-05	5.6e-05	74976.7	20	16	13	11	14	8	9	8
NEDD8	NEDD8	Q15843	Q15843	-		+	2.22944	-0.69863	-4.16733	19.7789	19.8532	19.2939	19.3774	19.4088	18.6497	18.9278	18.9539	1.23e-05	3.37e-05	9071.55	1	1	2	1	1	1	2	1
RASA2	Ras GTPase-activating protein 2;Isoform 2 of Ras GTPase-activating protein 2	Q15283;Q15283-2	Q15283;Q15283-2	-		+	2.06783	-0.69828	-3.84049	15.5075	15.5883	14.9633	15.4753	15.3424	14.8252	14.8214	14.3847	0.00167391	0.000923588	96614.16;96614.16-2	4	5	4	3	6	3	2	2
ELP3	Elongator complex protein 3;Isoform 2 of Elongator complex protein 3	Q9H9T3;Q9H9T3-2	Q9H9T3;Q9H9T3-2	-		+	2.33831	-0.698277	-4.39588	16.6545	16.436	16.8525	17.0366	16.7535	15.8609	16.2663	16.0178	0.00201	0.00107	62258.9;62258.9-2	6	11	7	10	7	4	6	4
NCEH1	Neutral cholesterol ester hydrolase 1	Q6PIU2	Q6PIU2	-		+	1.68673	-0.696106	-3.1205	17.823	18.0241	17.1467	17.2675	17.6707	16.8171	16.8943	16.9596	0.000185203	0.000151265	45807.8	11	12	11	11	13	11	11	11
MRPL21	39S ribosomal protein L21, mitochondrial	Q7Z2W9	Q7Z2W9	+	LSU;Mitochondrial central dogma;Mitochondrial ribosome;Translation	+	2.86713	-0.694523	-5.61825	15.9271	15.9647	16.0383	15.725	16.0775	15.2076	15.4905	15.0578	0.00239005	0.00120593	22814.7	4	5	4	5	5	4	3	1
BCAS3	Breast carcinoma-amplified sequence 3;Isoform 1 of Breast carcinoma-amplified sequence 3;Isoform 3 of Breast carcinoma-amplified sequence 3;Isoform 5 of Breast carcinoma-amplified sequence 3;Isoform 4 of Breast carcinoma-amplified sequence 3	Q9H6U6;Q9H6U6-2;Q9H6U6-3;Q9H6U6-7;Q9H6U6-8	Q9H6U6;Q9H6U6-2;Q9H6U6-3;Q9H6U6-7;Q9H6U6-8	-			0.552071	-0.693934	-1.2096	15.8916	17.6668	15.9415	15.7794	NaN	15.3939	16.1338	15.3499	0.0160692	0.00656773	101236.66;101236.66-2;101236.66-3;101236.66-7;101236.66-8	2	3	2	1	NaN	1	1	2
UST	Uronyl 2-sulfotransferase	Q9Y2C2	Q9Y2C2	-			0.359007	-0.693748	-0.861558	15.7415	NaN	14.866	NaN	14.8342	12.9644	15.3282	15.0679	0.00298466	0.0013522	47673	1	NaN	2	NaN	1	1	1	1
HEATR5A	HEAT repeat-containing protein 5A	Q86XA9	Q86XA9	-		+	1.78448	-0.692617	-3.29914	15.3838	15.726	16.1407	16.2151	15.711	15.2131	15.0085	15.2065	0.000287	0.000217	222004	9	11	17	17	13	9	7	7
LANCL1	Glutathione S-transferase LANCL1	O43813	O43813	-		+	2.05373	-0.692205	-3.81264	17.2956	17.8674	17.8388	17.5725	17.4069	16.9493	17.1144	16.6484	1.22e-05	3.37e-05	45283.1	9	10	10	10	10	9	8	9
ASB6	Ankyrin repeat and SOCS box protein 6	Q9NWX5	Q9NWX5	-			0.724246	-0.69163	-1.58254	16.2167	NaN	14.9581	16.1516	15.639	NaN	15.0364	15.0631	0.00257	0.00126	47136	3	NaN	1	1	1	NaN	1	1
LGMN	Legumain;Isoform 2 of Legumain;Isoform 3 of Legumain	Q99538;Q99538-2;Q99538-3	Q99538;Q99538-2;Q99538-3	-		+	2.09187	-0.691423	-3.88823	16.1515	15.6804	15.8983	16.48	16.0465	15.346	15.3845	15.3492	0.00193892	0.00104061	49411.16;49411.16-2;49411.16-3	4	4	4	4	3	3	4	4
EHBP1L1	EH domain-binding protein 1-like protein 1	Q8N3D4	Q8N3D4	-		+	2.26721	-0.691396	-4.24584	16.7611	16.6608	16.6446	16.0727	16.5949	15.8181	15.8554	15.8928	1.67e-05	3.56e-05	161854	15	19	16	8	18	4	5	4
CLDN11	Claudin-11	O75508	O75508	-			0.252601	-0.691215	-0.618491	18.9454	18.5944	17.5216	14.2014	17.2296	16.5132	16.6605	16.6481	1.5e-05	3.47e-05	21993.2	4	3	2	1	2	2	2	3
DNPEP	Aspartyl aminopeptidase	Q9ULA0	Q9ULA0			+	4.12283	-0.690697	-9.54773	16.9815	17.0585	17.0534	16.7857	16.9065	16.2031	16.2782	16.3178	9.81e-05	9.43e-05	52428.3	9	10	9	9	8	10	9	10
UFC1	Ubiquitin-fold modifier-conjugating enzyme 1	Q9Y3C8	Q9Y3C8	-		+	2.82551	-0.690476	-5.51455	17.2559	17.4948	17.7523	17.4878	17.5125	16.6835	16.9934	16.7536	0.00115	0.000676	19458.4	4	4	4	4	4	3	3	3
PSMD5	26S proteasome non-ATPase regulatory subunit 5;Isoform 2 of 26S proteasome non-ATPase regulatory subunit 5	Q16401;Q16401-2	Q16401;Q16401-2	-		+	5.16463	-0.690294	-14.4638	18.1198	18.2231	18.1715	18.0206	18.1048	17.4158	17.4789	17.4184	1.24e-05	3.37e-05	56195.72;56195.72-2	17	16	17	16	16	16	15	15
ACP1	Low molecular weight phosphotyrosine protein phosphatase	P24666	P24666	-		+	4.07263	-0.690036	-9.35506	18.4351	18.384	18.6259	18.3082	18.5006	17.7958	17.7191	17.7672	1.79e-05	3.64e-05	18042.5	6	6	7	6	6	5	4	5
CAVIN3	Caveolae-associated protein 3	Q969G5	Q969G5	-		+	2.31309	-0.689697	-4.34232	19.2521	19.8767	19.7451	19.5295	19.3355	18.9078	18.8424	18.824	7.49e-06	3.32e-05	27701.2	8	8	8	9	9	7	7	7
OXR1	Isoform 2 of Oxidation resistance protein 1;Isoform 5 of Oxidation resistance protein 1	Q8N573-2;Q8N573-5	Q8N573-2;Q8N573-5	+	Detoxification;Metabolism;ROS and glutathione metabolism	+	2.29029	-0.689639	-4.2942	15.0981	15.1226	14.8733	15.1462	14.7812	14.2376	14.0604	14.6459	0.0015721	0.000874635	93734.18;94692.41	7	7	3	6	2	4	3	3
INA	Alpha-internexin	Q16352	Q16352	-			1.15989	-0.689185	-2.2094	15.599	15.5239	15.1838	14.9355	16.3112	14.8021	14.7694	14.8929	0.000127	0.000113	55390.6	3	4	1	3	8	1	1	1
RBMS2	RNA-binding motif, single-stranded-interacting protein 2	Q15434	Q15434	-		+	2.92728	-0.686928	-5.7706	17.4126	17.4795	17.0694	17.3687	17.5159	16.8085	16.5483	16.6901	0.00247	0.00123	43958.6	3	2	1	2	3	2	2	2
TMEM120A	Ion channel TACAN;Isoform 2 of Ion channel TACAN	Q9BXJ8;Q9BXJ8-2	Q9BXJ8;Q9BXJ8-2	-		+	3.33486	-0.6863	-6.88697	16.3838	16.2523	16.1931	15.9563	16.1521	15.5351	15.5635	15.4051	0.000286	0.000216	40610.28;40610.28-2	4	2	3	2	3	2	2	2
PTGR1	Prostaglandin reductase 1;Isoform 2 of Prostaglandin reductase 1	Q14914;Q14914-2	Q14914;Q14914-2	-		+	2.60548	-0.68571	-4.98859	17.7195	18.0682	17.6381	18.1064	18.111	17.237	17.2428	17.249	9.11e-06	3.33e-05	35869.83;35869.83-2	12	11	11	11	12	10	9	9
FLNC	Filamin-C	Q14315	Q14315	-		+	1.5172	-0.68551	-2.81899	20.0539	19.4849	19.1369	19.1471	19.823	18.8656	18.8103	18.8551	5.23e-06	3.26e-05	291022	136	124	125	121	139	121	123	125
THRAP3	Thyroid hormone receptor-associated protein 3	Q9Y2W1	Q9Y2W1	-		+	4.19745	-0.685297	-9.84077	16.6995	16.6734	16.679	16.4483	16.6693	15.8643	16.0033	15.9782	5.18e-06	3.26e-05	108666	15	16	15	15	16	11	14	14
EXOC3	Exocyst complex component 3	O60645	O60645	-		+	5.1089	-0.685232	-14.15	16.9984	16.9678	17.0577	16.8787	17.0697	16.2687	16.3374	16.3216	0.000188495	0.000153099	85567.4	16	12	14	13	10	9	11	11
MRPL16	39S ribosomal protein L16, mitochondrial	Q9NX20	Q9NX20	+	LSU;Mitochondrial central dogma;Mitochondrial ribosome;Translation	+	1.39594	-0.684733	-2.75262	16.772	17.3822	16.7532	16.6497	16.8244	NaN	16.4218	15.9613	0.00261304	0.00127374	28449.2	4	3	4	2	5	NaN	1	2
MRPL58	Peptidyl-tRNA hydrolase ICT1, mitochondrial	Q14197	Q14197	+	LSU;Mitochondrial central dogma;Mitochondrial ribosome;Translation;Translation factors	+	3.9621	-0.684592	-8.94287	17.0776	17.2123	16.966	16.8927	16.9892	16.3388	16.2912	16.3989	0.000909993	0.000556556	23630.1	5	5	3	4	5	2	3	2
NAP1L1	Nucleosome assembly protein 1-like 1;Isoform 2 of Nucleosome assembly protein 1-like 1	P55209;P55209-2	P55209;P55209-2	-		+	3.17166	-0.683575	-6.42153	19.4234	19.0501	19.0793	19.0133	19.2915	18.4796	18.517	18.4673	1.72e-05	3.59e-05	45374.15;45374.15-2	10	10	10	10	10	9	8	9
YWHAG	14-3-3 protein gamma	P61981	P61981	-		+	3.62979	-0.683022	-7.79731	19.0089	18.6654	18.7813	18.8813	18.7748	18.1578	18.2274	18.0327	1.03e-06	3.26e-05	28302.6	7	7	7	7	7	7	7	7
EXD2	Exonuclease 3'-5' domain-containing protein 2;Isoform 2 of Exonuclease 3'-5' domain-containing protein 2	Q9NVH0;Q9NVH0-2	Q9NVH0;Q9NVH0-2	+	Mitochondrial central dogma;Translation	+	2.41144	-0.682942	-4.55347	15.7944	15.8503	15.2581	15.6828	15.7159	14.8809	15.1248	14.9264	0.00100665	0.000605234	70352.64;70352.64-2	4	6	3	3	4	3	2	4
MYH14	Myosin-14;Isoform 2 of Myosin-14;Isoform 6 of Myosin-14	Q7Z406;Q7Z406-2;Q7Z406-6	Q7Z406;Q7Z406-2;Q7Z406-6	-			0.628164	-0.68155	-1.31854	19.1639	17.2668	17.5284	17.5825	18.6696	17.4662	17.6689	16.9469	2.83e-05	4.44e-05	227870.59;227870.59-2;227870.59-6	2	3	3	2	2	3	3	2
H2AC21	Histone H2A type 2-B	Q8IUE6	Q8IUE6	-		+	3.87853	-0.681442	-8.6419	17.2278	17.0826	17.1475	16.9112	17.1443	16.4772	16.4595	16.3269	0.000696	0.000449	13995.3	2	2	2	2	2	2	2	2
MEMO1	Protein MEMO1;Isoform 3 of Protein MEMO1	Q9Y316;Q9Y316-3	Q9Y316;Q9Y316-3	-		+	2.65787	-0.676961	-5.11054	17.5888	17.4552	17.2981	17.4165	17.5843	16.4962	16.8815	16.9971	1.18e-05	3.36e-05	33733.15;33733.15-3	7	6	6	7	6	5	5	5
CCDC80	Coiled-coil domain-containing protein 80;Isoform 2 of Coiled-coil domain-containing protein 80	Q76M96;Q76M96-2	Q76M96;Q76M96-2	-		+	1.9337	-0.676891	-3.87937	NaN	15.9409	16.2586	15.7827	15.6196	15.1066	15.1877	15.3764	0.00269	0.00129	108173.71;108173.71-2	NaN	2	3	4	3	4	3	4
KHDRBS3	KH domain-containing, RNA-binding, signal transduction-associated protein 3;Isoform 2 of KH domain-containing, RNA-binding, signal transduction-associated protein 3	O75525;O75525-2	O75525;O75525-2	-		+	1.57788	-0.676129	-2.92578	15.4991	15.8518	15.1651	15.6344	15.53	14.8927	14.4248	15.2624	0.000888	0.000545	38799.51;38799.51-2	4	4	3	3	3	3	3	4
MAVS	Mitochondrial antiviral-signaling protein;Isoform 4 of Mitochondrial antiviral-signaling protein	Q7Z434;Q7Z434-4	Q7Z434;Q7Z434-4	+	Immune response;Signaling	+	1.85594	-0.675419	-3.4322	17.381	17.1482	17.0394	16.5189	17.0479	16.3853	16.4674	16.2023	1.24e-05	3.37e-05	56528.1;56528.1-4	7	7	7	7	7	5	5	6
PXMP2	Peroxisomal membrane protein 2	Q9NR77	Q9NR77	+	0	+	3.18534	-0.6727	-6.45956	17.0537	16.9971	17.0342	16.8147	16.6757	16.2939	16.2892	16.144	9.65e-05	9.32e-05	22252.5	2	3	3	3	3	3	3	2
RPAP3	RNA polymerase II-associated protein 3	Q9H6T3	Q9H6T3	-		+	4.18025	-0.671305	-9.77251	16.3639	16.3319	16.1245	16.3172	16.3187	15.5296	15.6168	15.7135	0.00023445	0.000182871	75718.6	7	7	5	7	5	8	6	7
NDUFS4	NADH dehydrogenase [ubiquinone] iron-sulfur protein 4, mitochondrial	O43181	O43181	+	CI subunits;Complex I;OXPHOS;OXPHOS subunits	+	1.31674	-0.670201	-2.47358	16.28	16.5092	16.5102	16.5794	16.1281	16.1285	16.0039	15.0611	0.00211	0.00111	20108	2	2	2	2	2	1	1	2
CNPY4	Protein canopy homolog 4	Q8N129	Q8N129	-		+	1.77274	-0.670044	-3.27748	16.7846	16.8274	17.1611	17.526	16.9336	16.4741	16.532	16.1233	0.000273	0.000208	28309.7	5	4	5	5	5	5	4	4
ANK2	Ankyrin-2;Isoform 2 of Ankyrin-2;Isoform 4 of Ankyrin-2	Q01484;Q01484-2;Q01484-5	Q01484;Q01484-2;Q01484-5	-		+	3.56985	-0.669658	-7.60467	15.8791	15.9377	16.1177	15.8089	15.769	15.243	15.1489	15.3065	0.000427	0.000303	433714.64;433714.64-2;433714.64-5	4	4	6	3	8	3	4	6
OXA1L	Mitochondrial inner membrane protein OXA1L;Isoform 2 of Mitochondrial inner membrane protein OXA1L	Q15070;Q15070-2	Q15070;Q15070-2	+	Protein import, sorting and homeostasis;Mitochondrial central dogma;OXA;Protein import and sorting;Translation	+	2.06914	-0.667322	-3.84308	15.9422	15.7899	15.4201	15.6515	15.9187	15.2565	15.2173	14.7577	0.00057	0.000382	48547.84;48547.84-2	3	4	3	4	5	3	3	3
RPL34	60S ribosomal protein L34	P49207	P49207	-		+	6.0421	-0.667258	-20.3786	19.9607	19.889	20.0001	19.9139	19.8811	19.2739	19.2844	19.2268	2.35e-05	4.1e-05	13293	3	3	3	3	3	3	3	3
HECTD3	E3 ubiquitin-protein ligase HECTD3	Q5T447	Q5T447	-		+	2.84302	-0.665396	-5.55801	16.4714	16.2042	16.0935	16.1256	16.3303	15.6618	15.7024	15.3747	0.00134154	0.00076885	97112.9	6	5	4	5	6	5	5	2
FSTL1	Follistatin-related protein 1	Q12841	Q12841	-		+	1.59031	-0.664474	-2.94782	16.1091	16.5939	16.9729	17.062	16.6642	16.039	15.9518	16.0569	1.36e-06	3.26e-05	34985.5	8	9	9	9	10	8	8	7
DIPK2A	Divergent protein kinase domain 2A	Q8NDZ4	Q8NDZ4	-		+	1.40594	-0.663071	-2.62599	16.2453	15.5773	15.4236	16.1906	15.945	14.9771	15.5545	15.1084	0.00267	0.00129	49481.9	3	3	2	3	3	2	3	3
MIF	Macrophage migration inhibitory factor	P14174	P14174	-		+	2.62269	-0.662112	-5.02843	21.5173	21.2283	21.1853	20.9023	21.1484	20.5235	20.5086	20.5706	4.36e-05	5.49e-05	12476.3	2	2	2	2	2	2	2	2
FKBP11	Peptidyl-prolyl cis-trans isomerase FKBP11;Isoform 2 of Peptidyl-prolyl cis-trans isomerase FKBP11	Q9NYL4;Q9NYL4-2	Q9NYL4;Q9NYL4-2	-		+	1.42435	-0.661856	-2.65769	17.5337	17.3077	17.9677	18.3362	17.4918	17.0629	17.0765	17.0573	5.64e-05	6.42e-05	22180.37;22180.37-2	5	5	6	5	5	5	5	5
RBM42	RNA-binding protein 42;Isoform 2 of RNA-binding protein 42;Isoform 3 of RNA-binding protein 42;Isoform 4 of RNA-binding protein 42	Q9BTD8;Q9BTD8-2;Q9BTD8-3;Q9BTD8-4	Q9BTD8;Q9BTD8-2;Q9BTD8-3;Q9BTD8-4	-		+	1.65964	-0.661398	-3.07165	17.2755	17.0992	16.523	16.983	17.2293	16.1582	16.2422	16.6813	5.04e-05	5.97e-05	50414.02;50414.02-2;50414.02-3;50414.02-4	4	3	2	3	3	2	2	3
CTTN	Src substrate cortactin	Q14247	Q14247	-			0.982095	-0.661397	-1.91344	18.2281	17.9807	17.7503	16.8098	18.1427	17.214	16.984	17.1647	3.36e-06	3.26e-05	61586.1	21	18	19	17	21	19	19	18
COMMD3	COMM domain-containing protein 3	Q9UBI1	Q9UBI1	-		+	2.23224	-0.661112	-4.17312	16.5532	16.8199	16.9324	16.7059	16.5817	15.7876	16.3807	16.0042	3.07e-05	4.62e-05	22151.1	4	3	4	3	3	2	3	3
KAT7	Histone acetyltransferase KAT7;Isoform 2 of Histone acetyltransferase KAT7;Isoform 4 of Histone acetyltransferase KAT7	O95251;O95251-2;O95251-4	O95251;O95251-2;O95251-4	-		+	1.68438	-0.660641	-4.48434	16.0918	16.2792	NaN	NaN	NaN	15.4366	15.4126	15.7254	0.0165329	0.00674458	70642.39;70642.39-2;70642.39-4	2	1	NaN	NaN	NaN	1	2	2
TEP1	Telomerase protein component 1;Isoform 2 of Telomerase protein component 1	Q99973;Q99973-2	Q99973;Q99973-2	-		+	2.4133	-0.660065	-5.07185	NaN	15.6727	15.4067	15.3141	15.3391	14.9407	14.5846	14.7939	0.00129955	0.000749118	290489.94;290489.94-2	NaN	5	3	4	4	8	5	5
MACROD1	ADP-ribose glycohydrolase MACROD1	Q9BQ69	Q9BQ69	+	Signaling	+	1.59846	-0.659665	-2.96229	16.7366	16.9771	17.3518	16.4409	16.5229	16.1102	16.2366	16.0918	9.92e-05	9.49e-05	35505.1	2	4	4	2	3	4	3	5
CSNK2B	Casein kinase II subunit beta	P67870	P67870	-		+	3.70055	-0.658288	-8.03005	17.1733	17.1721	16.9413	16.9711	16.9839	16.2854	16.5001	16.3846	2.04e-05	3.83e-05	24942.4	4	5	5	4	4	5	5	3
SMAD3	Mothers against decapentaplegic homolog 3	P84022	P84022	-		+	1.61473	-0.656944	-2.99125	17.2194	16.9148	16.8368	16.2242	16.7056	16.2188	16.0756	16.0752	4.88e-05	5.87e-05	48080.8	6	4	4	3	5	4	5	4
PSIP1	PC4 and SFRS1-interacting protein	O75475	O75475	-		+	2.85066	-0.656804	-5.57704	16.6215	16.5724	16.3275	16.3127	16.7391	15.7674	15.8654	15.9407	0.000691561	0.000446291	60103.2	11	11	10	11	11	9	8	10
PEX11B	Peroxisomal membrane protein 11B;Isoform 2 of Peroxisomal membrane protein 11B	O96011;O96011-2	O96011;O96011-2	+	0	+	3.77275	-0.655279	-8.2736	16.4989	16.5615	16.5834	16.2636	16.4523	15.8055	15.8744	15.7701	6.54e-05	7.05e-05	28431.28;28431.28-2	5	5	5	5	5	4	4	4
GMFB	Glia maturation factor beta	P60983	P60983	-		+	3.08627	-0.655259	-6.18806	18.243	18.1083	18.2715	17.9721	18.0615	17.6797	17.3972	17.3512	0.000113139	0.000104067	16713.2	6	7	7	6	7	4	5	6
VTI1B	Vesicle transport through interaction with t-SNAREs homolog 1B	Q9UEU0	Q9UEU0	-		+	2.31444	-0.653627	-4.34516	16.8787	16.922	16.7762	16.6731	16.6691	16.2441	15.772	16.3745	0.000654	0.000428	26688.4	5	5	3	5	5	1	3	1
ANPEP	Aminopeptidase N	P15144	P15144	-		+	1.60536	-0.653272	-2.97456	18.6755	19.2052	19.4053	19.6713	19.343	18.6171	18.5836	18.6198	3.81e-06	3.26e-05	109540	38	38	39	38	40	40	36	39
TUBB6	Tubulin beta-6 chain	Q9BUF5	Q9BUF5	-		+	3.45537	-0.653137	-7.24772	20.5062	20.2893	20.2073	20.1067	20.3441	19.6134	19.6636	19.6357	1.19e-05	3.36e-05	49857.1	16	17	17	17	17	15	16	16
S100A10	Protein S100-A10	P60903	P60903	-		+	1.60861	-0.652859	-2.98034	18.9021	18.9739	19.2938	18.3284	18.6686	18.062	18.2316	18.2479	0.00013	0.000115	11203.1	4	3	4	4	4	3	3	4
GATAD2B	Transcriptional repressor p66-beta	Q8WXI9	Q8WXI9	-		+	1.87105	-0.652627	-3.46062	15.8028	15.5948	15.4844	15.1701	15.9323	15.1246	14.8822	14.826	0.000248763	0.000192241	65260.7	5	5	5	4	4	2	3	1
LOX	Protein-lysine 6-oxidase	P28300	P28300	-		+	2.35632	-0.651859	-4.43438	18.1573	18.3267	17.8444	17.8811	18.3523	17.5146	17.3706	17.4964	1.67e-05	3.56e-05	46944.1	10	9	9	9	8	8	8	9
RILPL1	RILP-like protein 1	Q5EBL4	Q5EBL4	-		+	2.99443	-0.6509	-5.94425	16.3851	16.3608	16.4938	16.7362	16.2792	15.8686	15.8024	15.7294	0.000164	0.000138	47107.9	10	10	10	11	9	7	8	7
DYRK1A	Dual specificity tyrosine-phosphorylation-regulated kinase 1A;Isoform 1 of Dual specificity tyrosine-phosphorylation-regulated kinase 1A;Isoform 2 of Dual specificity tyrosine-phosphorylation-regulated kinase 1A;Isoform 3 of Dual specificity tyrosine-phosphorylation-regulated kinase 1A;Isoform 4 of Dual specificity tyrosine-phosphorylation-regulated kinase 1A	Q13627;Q13627-2;Q13627-3;Q13627-4;Q13627-5	Q13627;Q13627-2;Q13627-3;Q13627-4;Q13627-5	-			0.873567	-0.649771	-2.45155	NaN	NaN	15.2078	14.7346	NaN	NaN	14.4409	14.2019	0.00292363	0.00134023	85583.79;85583.79-2;85583.79-3;85583.79-4;85583.79-5	NaN	NaN	2	1	NaN	NaN	2	2
TP53BP1	TP53-binding protein 1;Isoform 2 of TP53-binding protein 1;Isoform 3 of TP53-binding protein 1	Q12888;Q12888-2;Q12888-3	Q12888;Q12888-2;Q12888-3	-		+	5.64999	-0.649077	-17.4927	16.3942	16.4277	16.4782	16.4278	16.4405	15.844	15.8122	15.6977	0.000114777	0.000105127	213574.4;213574.4-2;213574.4-3	20	20	22	22	19	10	9	9
AKAP11	A-kinase anchor protein 11	Q9UKA4	Q9UKA4	-		+	2.75719	-0.648336	-5.3473	15.9224	15.6321	15.7114	15.3758	15.6642	15.1035	14.9662	14.9689	0.00251468	0.00124618	210512	3	4	4	1	4	4	4	3
CHMP4A	Charged multivesicular body protein 4a;Isoform 2 of Charged multivesicular body protein 4a	Q9BY43;Q9BY43-2	Q9BY43;Q9BY43-2	-		+	2.75233	-0.647338	-5.33555	17.2835	17.423	17.4977	17.0332	17.235	16.6718	16.7671	16.5026	0.00144	0.000816	25098.26;25098.26-2	4	3	3	3	3	2	1	3
SPTBN1	Spectrin beta chain, non-erythrocytic 1	Q01082	Q01082	-		+	3.50764	-0.647216	-7.40893	17.8378	17.8783	17.9136	17.5685	17.9078	17.1813	17.2048	17.1358	2.14e-06	3.26e-05	274609	117	114	120	113	120	102	108	107
ITGB3	Integrin beta-3	P05106	P05106	-			0.968553	-0.645472	-1.89096	16.6255	15.0375	15.9636	15.7936	15.6804	15.1972	15.0998	15.2269	7.4e-05	7.71e-05	87057.8	9	2	2	3	4	3	3	4
CFDP1	Craniofacial development protein 1	Q9UEE9	Q9UEE9	-		+	1.44998	-0.645205	-2.70197	17.5703	17.3928	17.0588	16.6819	17.5124	16.6144	16.3775	16.8021	0.000648	0.000425	33592.9	3	3	3	1	2	1	1	1
MTMR10	Myotubularin-related protein 10	Q9NXD2	Q9NXD2	-		+	2.05587	-0.644631	-3.81685	15.5563	15.4832	14.9882	15.224	15.2815	14.5633	14.9393	14.4835	0.00271	0.0013	88273.1	3	2	2	2	2	1	2	3
FBLN5	Fibulin-5	Q9UBX5	Q9UBX5	-		+	2.16043	-0.644327	-4.02602	15.7439	15.0918	15.4522	15.5132	15.708	14.7628	14.9428	14.8668	2.6e-05	4.27e-05	50180.5	2	1	2	2	4	4	3	2
ITSN2	Intersectin-2;Isoform 2 of Intersectin-2;Isoform 3 of Intersectin-2;Isoform 4 of Intersectin-2	Q9NZM3;Q9NZM3-2;Q9NZM3-3;Q9NZM3-4	Q9NZM3;Q9NZM3-2;Q9NZM3-3;Q9NZM3-4	-		+	2.0076	-0.644292	-3.72223	15.8223	15.7199	15.44	15.5916	15.4975	15.3636	14.8263	14.7199	0.0104912	0.00438932	193461.45;193461.45-2;193461.45-3;193461.45-4	7	4	2	4	4	1	3	2
GLIPR1	Glioma pathogenesis-related protein 1	P48060	P48060	-		+	1.63111	-0.643916	-3.02049	16.8366	17.3743	17.0121	16.7857	17.4705	16.6823	16.1895	16.484	0.000212643	0.000168902	30365.9	1	3	2	2	5	3	2	4
SULF1	Extracellular sulfatase Sulf-1	Q8IWU6	Q8IWU6	-			0.474835	-0.643901	-1.0478	16.6018	17.0322	17.3644	18.3197	15.511	16.287	16.3668	16.3119	1.8e-05	3.64e-05	101027	4	5	4	8	2	4	5	4
USO1	General vesicular transport factor p115;Isoform 2 of General vesicular transport factor p115	O60763;O60763-2	O60763;O60763-2	-		+	3.87386	-0.643149	-8.62534	17.4696	17.5423	17.6696	17.7585	17.4987	16.9677	16.9642	16.9018	5.84e-06	3.26e-05	107895.26;107895.26-2	31	30	30	30	30	23	26	21
UVRAG	UV radiation resistance-associated gene protein	Q9P2Y5	Q9P2Y5	-			1.1756	-0.643045	-2.81994	NaN	NaN	16.0079	16.5641	NaN	15.5862	15.7889	15.5536	0.0133563	0.00552244	78150.8	NaN	NaN	1	1	NaN	2	3	2
VIM	Vimentin	P08670	P08670	-		+	4.10646	-0.642227	-9.48454	21.3104	21.2951	21.29	21.131	21.3862	20.7371	20.6293	20.5544	1.22e-05	3.37e-05	53651.7	62	59	63	59	61	60	57	58
PSMC3	26S proteasome regulatory subunit 6A	P17980	P17980	-		+	7.2462	-0.640261	-32.4718	18.3331	18.2892	18.334	18.2846	18.3525	17.696	17.6815	17.6576	1.97e-05	3.76e-05	49203.5	19	19	19	21	22	17	17	17
HEG1	Protein HEG homolog 1	Q9ULI3	Q9ULI3	-		+	1.34284	-0.639655	-2.51799	16.8399	16.4632	16.3699	15.7496	16.3583	15.8543	15.4428	15.8525	0.000127107	0.000113201	147461	4	2	3	1	3	2	2	3
MECP2	Methyl-CpG-binding protein 2;Isoform B of Methyl-CpG-binding protein 2	P51608;P51608-2	P51608;P51608-2	-		+	3.50948	-0.638319	-7.41465	15.9634	16.1591	16.154	15.9243	15.9939	15.4229	15.52	15.259	0.0016752	0.000924	52440.63;52440.63-2	4	2	3	1	5	1	2	3
AFAP1	Actin filament-associated protein 1;Isoform 2 of Actin filament-associated protein 1	Q8N556;Q8N556-2	Q8N556;Q8N556-2	-			1.0006	-0.638088	-1.94418	16.4533	15.8415	16.8366	17.0675	17.0239	16.2724	15.6938	16.0532	0.000101496	9.63e-05	80724.92;80724.92-2	10	7	8	10	11	5	8	5
NIT1	Deaminated glutathione amidase;Isoform 1 of Deaminated glutathione amidase;Isoform 5 of Deaminated glutathione amidase	Q86X76;Q86X76-2;Q86X76-4	Q86X76;Q86X76-2;Q86X76-4	+	Detoxification;Metabolism;ROS and glutathione metabolism	+	5.61558	-0.63771	-17.2593	16.8143	16.8908	16.9113	16.8594	16.8278	16.2192	16.2906	16.1592	0.000109	0.000101	35896.46;35896.46-2;35896.46-4	11	10	10	10	11	8	8	9
CSPG4	Chondroitin sulfate proteoglycan 4	Q6UVK1	Q6UVK1	-			1.04478	-0.63721	-2.01758	17.5624	17.7806	16.4705	16.8899	17.0815	16.6362	16.4514	16.4717	7.08e-05	7.43e-05	250537	16	15	9	10	13	8	9	8
HAS2	Hyaluronan synthase 2	Q92819	Q92819	-			0.779734	-0.636299	-1.69119	16.6135	16.3736	NaN	NaN	15.4537	15.6825	15.5913	15.2582	0.000105231	9.88e-05	63566.3	6	1	NaN	NaN	4	1	3	3
MRPL40	39S ribosomal protein L40, mitochondrial	Q9NQ50	Q9NQ50	+	LSU;Mitochondrial central dogma;Mitochondrial ribosome;Translation	+	5.40023	-0.63607	-15.8652	17.2339	17.2794	17.1753	17.2788	17.3279	16.6732	16.5743	16.6215	0.00283	0.00133	24490.4	3	3	1	2	2	3	1	3
DST	Isoform 6 of Dystonin	Q03001-11	Q03001-11	-			0.485739	-0.634616	-1.1164	14.8673	14.8945	NaN	16.5403	NaN	15.0039	14.8384	14.5559	0.0057572	0.00247144	25379.1	1	2	NaN	1	NaN	1	1	1
COQ9	Ubiquinone biosynthesis protein COQ9, mitochondrial	O75208	O75208	+	Coenzyme Q metabolism;Metabolism;Metals and cofactors		0.525313	-0.634426	-1.16027	14.9032	13.868	15.7238	14.9134	15.0709	13.8356	14.6872	NaN	0.000352055	0.000257924	35509	1	2	2	2	3	1	1	NaN
TSSC4	Protein TSSC4;Isoform 2 of Protein TSSC4	Q9Y5U2;Q9Y5U2-2	Q9Y5U2;Q9Y5U2-2	-		+	1.51649	-0.634357	-2.99007	16.2976	16.4019	16.3372	NaN	15.8299	15.4583	15.3634	15.9251	0.00263402	0.00127929	34325.51;34325.51-2	3	4	1	NaN	2	2	1	1
MAP7D1	MAP7 domain-containing protein 1	Q3KQU3	Q3KQU3	-		+	1.99421	-0.633294	-3.69617	17.132	16.9233	16.7724	16.4306	17.0855	16.2173	16.1768	16.3122	3.72e-05	5.02e-05	92819.9	15	10	10	9	15	2	5	2
TARS2	Threonine--tRNA ligase, mitochondrial	Q9BW92	Q9BW92	+	Mitochondrial central dogma;mt-tRNA synthetases;Translation		0.400796	-0.632739	-0.946743	15.5402	NaN	16.5864	14.9187	15.7145	15.7503	NaN	14.3641	0.0213319	0.00858412	81036.1	1	NaN	3	1	2	1	NaN	1
MRPL18	39S ribosomal protein L18, mitochondrial	Q9H0U6	Q9H0U6	+	LSU;Mitochondrial central dogma;Mitochondrial ribosome;Translation	+	1.49825	-0.631674	-2.95366	17.7172	16.9819	17.5459	17.4762	17.6026	NaN	16.8787	16.7875	0.00120443	0.000702659	20576.5	2	2	1	2	2	NaN	1	1
KCTD9	BTB/POZ domain-containing protein KCTD9	Q7L273	Q7L273	-		+	1.53016	-0.630747	-2.8417	15.4205	15.4125	15.768	15.0024	14.9976	14.8046	14.8666	14.3972	0.0117534	0.00488854	42566.7	3	3	2	1	2	2	3	2
RAB9A	Ras-related protein Rab-9A	P51151	P51151	-		+	1.59746	-0.630561	-2.96051	16.4205	16.4609	16.2078	15.9252	16.3784	15.1936	15.8144	15.936	2e-05	3.78e-05	22837.6	5	6	6	5	6	4	5	5
MYADM	Myeloid-associated differentiation marker	Q96S97	Q96S97	-		+	2.12368	-0.630422	-3.95185	19.0004	18.3371	18.5331	18.4102	18.4994	17.8235	17.9888	17.9645	8.43e-06	3.33e-05	35273.6	5	5	5	5	5	5	5	5
SLC25A20	Mitochondrial carnitine/acylcarnitine carrier protein	O43772	O43772	+	Carnitine shuttle;Carnitine synthesis and transport;Fatty acid oxidation;Lipid metabolism;Metabolism;Metals and cofactors;SLC25A family;Small molecule transport	+	5.34285	-0.630304	-15.5124	16.4926	16.5849	16.6318	16.6609	16.5543	15.9271	15.9698	15.9669	0.000396601	0.000284415	32943.7	7	5	6	6	8	6	5	6
TRAPPC9	Trafficking protein particle complex subunit 9;Isoform 2 of Trafficking protein particle complex subunit 9;Isoform 3 of Trafficking protein particle complex subunit 9	Q96Q05;Q96Q05-2;Q96Q05-3	Q96Q05;Q96Q05-2;Q96Q05-3	-			1.03514	-0.627431	-2.07858	14.0814	NaN	14.8921	14.4763	13.9642	13.6644	13.4073	14.1066	0.00293	0.00134	128529.83;128529.83-2;128529.83-3	1	NaN	3	2	1	1	1	1
EEF1AKNMT	eEF1A lysine and N-terminal methyltransferase	Q8N6R0	Q8N6R0	-		+	2.67253	-0.62736	-5.14503	16.7822	16.8121	16.7455	16.3875	16.6593	15.9932	15.9295	16.2272	0.000289	0.000218	78767.9	7	6	9	7	8	5	7	7
SRGAP1	SLIT-ROBO Rho GTPase-activating protein 1	Q7Z6B7	Q7Z6B7	-		+	2.09859	-0.627266	-3.90161	16.6826	16.4008	16.2189	15.9634	16.4309	15.7231	15.7552	15.6578	0.000196	0.000158	124264	27	21	21	12	23	7	8	9
ATP5F1A	ATP synthase subunit alpha, mitochondrial	P25705	P25705	+	Complex V;CV subunits;OXPHOS;OXPHOS subunits	+	6.26997	-0.624818	-22.2634	20.1336	20.1853	20.1969	20.23	20.1885	19.5185	19.6085	19.5592	1.5e-05	3.47e-05	59750.6	23	22	23	21	24	23	20	23
PPAT	Amidophosphoribosyltransferase	Q06203	Q06203	-		+	1.69198	-0.624261	-3.13001	16.3729	15.835	15.7379	16.0195	16.278	15.3949	15.7088	15.1696	0.00103981	0.00062229	57399	5	4	4	4	4	2	2	3
DMAC2L	ATP synthase subunit s, mitochondrial	Q99766	Q99766	+	Complex V;CV subunits;OXPHOS;OXPHOS subunits	+	2.04662	-0.623313	-10.4802	NaN	15.8739	NaN	15.9926	NaN	15.306	15.3139	NaN	0.0202893	0.00819557	24866	NaN	2	NaN	1	NaN	1	1	NaN
SMARCC2	SWI/SNF complex subunit SMARCC2	Q8TAQ2	Q8TAQ2	-		+	3.21364	-0.622868	-6.53881	16.9804	17.0271	16.7371	16.7996	17.0812	16.3923	16.2797	16.2346	0.000215543	0.000170916	132879	18	15	13	14	17	13	11	11
TSG101	Tumor susceptibility gene 101 protein	Q99816	Q99816	-		+	5.14667	-0.622858	-14.3619	16.9402	16.8546	16.8217	16.7857	16.8983	16.2724	16.2665	16.1728	6.64e-05	7.11e-05	43944.3	12	10	10	11	11	11	10	9
ORMDL1	ORM1-like protein 1	Q9P0S3	Q9P0S3	-		+	1.45431	-0.622436	-2.70948	16.3623	16.2797	16.2206	16.0393	16.3567	15.0399	15.9594	15.8885	4.97e-06	3.26e-05	17371.4	3	3	2	3	4	2	3	3
MEAK7	MTOR-associated protein MEAK7	Q6P9B6	Q6P9B6	-		+	1.75512	-0.621115	-3.24508	16.6741	17.3663	16.8787	17.2535	17.3207	16.3249	16.5111	16.5967	7.48e-05	7.76e-05	50993.6	10	11	9	10	11	6	6	7
RABGAP1L	Rab GTPase-activating protein 1-like;Isoform 3 of Rab GTPase-activating protein 1-like;Isoform 4 of Rab GTPase-activating protein 1-like	Q5R372;Q5R372-3;Q5R372-4	Q5R372;Q5R372-3;Q5R372-4	-		+	1.44934	-0.619897	-2.70086	15.9473	15.7863	15.1861	15.4659	16.0161	14.7963	15.1575	15.2276	8.26e-06	3.33e-05	92512.91;92512.91-3;92512.91-4	7	4	1	1	3	3	1	5
SNX29	Sorting nexin-29;Isoform 2 of Sorting nexin-29	Q8TEQ0;Q8TEQ0-2	Q8TEQ0;Q8TEQ0-2	-		+	1.73973	-0.619319	-3.2169	16.9844	16.5713	16.2782	16.2654	16.4681	15.9678	16.0374	15.6773	0.000974	0.000588	91253.72;91253.72-2	8	9	3	2	5	1	1	3
PLCB4	1-phosphatidylinositol 4,5-bisphosphate phosphodiesterase beta-4;Isoform 1 of 1-phosphatidylinositol 4,5-bisphosphate phosphodiesterase beta-4;Isoform 3 of 1-phosphatidylinositol 4,5-bisphosphate phosphodiesterase beta-4;Isoform 4 of 1-phosphatidylinositol 4,5-bisphosphate phosphodiesterase beta-4	Q15147;Q15147-2;Q15147-4;Q15147-5	Q15147;Q15147-2;Q15147-4;Q15147-5	-			0.205413	-0.618458	-0.53162	NaN	17.2185	13.4665	15.1753	15.5146	NaN	14.4787	14.9719	1.27e-05	3.37e-05	134463.59;134463.59-2;134463.59-4;134463.59-5	NaN	2	1	2	2	NaN	2	1
SEPTIN9	Isoform 5 of Septin-9	Q9UHD8-5	Q9UHD8-5	-		+	3.11035	-0.617957	-6.25323	18.4931	18.5124	18.1281	18.3485	18.49	17.7623	17.8268	17.7403	6.81e-06	3.31e-05	64681.6	33	29	30	30	31	26	23	24
ITSN1	Intersectin-1;Isoform 10 of Intersectin-1;Isoform 11 of Intersectin-1;Isoform 12 of Intersectin-1;Isoform 2 of Intersectin-1;Isoform 3 of Intersectin-1;Isoform 4 of Intersectin-1;Isoform 7 of Intersectin-1;Isoform 8 of Intersectin-1;Isoform 9 of Intersectin-1	Q15811;Q15811-10;Q15811-11;Q15811-12;Q15811-2;Q15811-3;Q15811-4;Q15811-7;Q15811-8;Q15811-9	Q15811;Q15811-10;Q15811-11;Q15811-12;Q15811-2;Q15811-3;Q15811-4;Q15811-7;Q15811-8;Q15811-9	-		+	3.14522	-0.617938	-6.34853	16.5347	16.4184	16.5243	16.4191	16.3678	16.0624	15.6595	15.7829	0.00166	0.000917	195421.68;195421.68-10;195421.68-11;195421.68-12;195421.68-2;195421.68-3;195421.68-4;195421.68-7;195421.68-8;195421.68-9	9	7	9	9	7	5	5	6
ARHGEF11	Rho guanine nucleotide exchange factor 11;Isoform 2 of Rho guanine nucleotide exchange factor 11	O15085;O15085-2	O15085;O15085-2	-		+	2.25709	-0.617929	-4.22471	15.3706	15.849	15.3931	15.6171	15.5193	14.9915	15.1067	14.6975	0.00317	0.00141	167704.48;167704.48-2	3	5	5	5	8	3	5	4
RIOK2	Serine/threonine-protein kinase RIO2;Isoform 2 of Serine/threonine-protein kinase RIO2	Q9BVS4;Q9BVS4-2	Q9BVS4;Q9BVS4-2	-		+	2.00113	-0.617847	-3.70963	15.735	15.9334	15.8093	15.8773	16.0755	15.2802	14.9123	15.6122	0.001178	0.000689472	63283.01;63283.01-2	6	7	5	3	7	2	3	3
ASAP2	Arf-GAP with SH3 domain, ANK repeat and PH domain-containing protein 2;Isoform 2 of Arf-GAP with SH3 domain, ANK repeat and PH domain-containing protein 2	O43150;O43150-2	O43150;O43150-2	-		+	1.84017	-0.617801	-3.40265	14.5662	14.0129	14.7753	14.5642	14.4001	13.7632	14.0207	13.7539	0.00211	0.00111	111650.57;111650.57-2	2	5	3	4	2	1	3	2
AIFM2	Ferroptosis suppressor protein 1	Q9BRQ8	Q9BRQ8	+	Apoptosis;Detoxification;Metabolism;Mitochondrial dynamics and surveillance;ROS and glutathione metabolism	+	1.86299	-0.616093	-3.44545	16.4966	15.9972	16.176	15.9457	15.7205	15.3383	15.5551	15.4599	0.00177	0.000967	40526.7	3	3	3	3	2	3	2	3
LDAH	Lipid droplet-associated hydrolase;Isoform 2 of Lipid droplet-associated hydrolase	Q9H6V9;Q9H6V9-2	Q9H6V9;Q9H6V9-2	-		+	1.96221	-0.615376	-3.63428	16.8867	17.1824	17.0662	17.0416	16.9068	16.4196	16.0299	16.7545	0.00287	0.00133	37318.5;37318.5-2	2	2	2	3	3	1	2	2
TUBB4B	Tubulin beta-4B chain	P68371	P68371	-		+	4.2615	-0.614013	-10.0987	21.4286	21.4597	21.2947	21.2554	21.4756	20.7774	20.7437	20.7854	3.1e-06	3.26e-05	49831	23	23	23	23	23	22	22	23
ATP11B	Probable phospholipid-transporting ATPase IF	Q9Y2G3	Q9Y2G3	-		+	1.40787	-0.612588	-2.62932	17.0822	16.7774	16.7885	16.6627	16.1026	16.1425	16.2414	15.8264	0.00299955	0.00135527	134190	5	2	2	2	2	1	1	3
HTATIP2	Oxidoreductase HTATIP2;Isoform 3 of Oxidoreductase HTATIP2	Q9BUP3;Q9BUP3-3	Q9BUP3;Q9BUP3-3	+	0	+	1.94695	-0.611983	-3.60494	16.4999	16.4669	16.9364	16.8261	16.3653	16.2095	15.9989	15.8124	0.000465289	0.000325396	27048.96;27048.96-3	1	2	5	5	1	2	2	3
VTI1A	Vesicle transport through interaction with t-SNAREs homolog 1A;Isoform 1 of Vesicle transport through interaction with t-SNAREs homolog 1A	Q96AJ9;Q96AJ9-1	Q96AJ9;Q96AJ9-1	-		+	4.31219	-0.611603	-10.3071	16.0967	16.0981	16.2007	16.0104	15.9602	15.4216	15.4426	15.5207	6.92e-05	7.32e-05	25217.74;25217.74-1	5	4	4	5	5	3	3	3
ARL8A	ADP-ribosylation factor-like protein 8A	Q96BM9	Q96BM9	-			1.24133	-0.611473	-3.00656	NaN	NaN	NaN	17.6385	18.1255	17.3345	17.3485	17.1287	0.00276	0.00131	21415.9	NaN	NaN	NaN	1	1	1	1	1
WFS1	Wolframin	O76024	O76024	-		+	2.11577	-0.610426	-3.93596	16.9713	17.3331	16.724	17.0335	17.2839	16.3422	16.5645	16.4696	0.000129	0.000115	100292	10	9	6	10	10	6	8	7
SRPK1	SRSF protein kinase 1;Isoform 1 of SRSF protein kinase 1;Isoform 3 of SRSF protein kinase 1	Q96SB4;Q96SB4-3;Q96SB4-4	Q96SB4;Q96SB4-3;Q96SB4-4	-		+	2.43373	-0.610098	-4.60218	16.2195	16.2398	15.7641	16.0724	16.2474	15.3597	15.5653	15.5705	0.00296	0.00135	74324.77;74324.77-3;74324.77-4	6	5	3	6	5	2	4	3
EPS8	Epidermal growth factor receptor kinase substrate 8	Q12929	Q12929	-		+	3.04536	-0.610025	-6.07852	17.1218	16.8023	16.7453	16.7971	16.9459	16.312	16.1601	16.3452	1.41e-05	3.45e-05	91881.5	23	22	20	22	23	20	18	19
ANKZF1	Ankyrin repeat and zinc finger domain-containing protein 1	Q9H8Y5	Q9H8Y5	-			0.975765	-0.609678	-1.97137	15.5472	16.5801	15.7686	15.7032	15.6911	NaN	15.1965	15.3002	0.0029	0.00134	80926.8	1	1	1	1	2	NaN	2	1
UBAP2L	Ubiquitin-associated protein 2-like;Isoform 5 of Ubiquitin-associated protein 2-like	Q14157;Q14157-5	Q14157;Q14157-5	-			1.16975	-0.608482	-2.22589	17.236	16.9601	16.8879	16.0851	17.1452	16.319	16.2074	16.2367	2.18e-05	3.94e-05	114534.5;114534.5-5	12	11	12	10	11	10	11	10
ATP5PO	ATP synthase subunit O, mitochondrial	P48047	P48047	+	Complex V;CV subunits;OXPHOS;OXPHOS subunits	+	5.4176	-0.608368	-15.9735	18.9469	18.9196	18.9994	18.9718	19.059	18.4272	18.334	18.3517	6.47e-05	7.01e-05	23277.3	7	7	7	7	7	8	7	8
NTAN1	Protein N-terminal asparagine amidohydrolase	Q96AB6	Q96AB6	-		+	3.02696	-0.607869	-6.02974	15.9323	16.1204	15.7065	15.9488	15.863	15.426	15.2853	15.2076	0.00015642	0.000132617	34677.2	5	6	4	6	6	3	4	3
RIOK1	Serine/threonine-protein kinase RIO1	Q9BRS2	Q9BRS2	-			1.11434	-0.60772	-2.22285	15.7363	15.5693	16.437	15.9501	NaN	15.0595	15.6859	15.2009	0.00286219	0.00133	65583	2	4	3	1	NaN	1	1	2
GGT7	Glutathione hydrolase 7	Q9UJ14	Q9UJ14	-		+	2.62973	-0.607683	-5.04479	15.246	15.5809	15.3948	15.5933	15.4043	14.6103	14.914	14.9842	0.000386798	0.00027858	70466.8	3	3	3	4	3	6	3	6
TBCC	Tubulin-specific chaperone C	Q15814	Q15814	-		+	2.53002	-0.606805	-4.81634	17.3889	17.1663	17.0158	16.9061	17.3257	16.6372	16.4734	16.5507	0.000696346	0.000448884	39248.1	6	4	6	6	7	5	6	6
PPP1R8	Nuclear inhibitor of protein phosphatase 1	Q12972	Q12972	-		+	3.80531	-0.606341	-8.38547	15.8534	16.107	16.0451	15.9176	15.9029	15.4466	15.2823	15.3476	0.000743648	0.000471938	38478.8	8	7	6	6	8	3	7	6
VRK2	Serine/threonine-protein kinase VRK2;Isoform 3 of Serine/threonine-protein kinase VRK2;Isoform 4 of Serine/threonine-protein kinase VRK2	Q86Y07;Q86Y07-3;Q86Y07-4	Q86Y07;Q86Y07-3;Q86Y07-4	mito-interacting		+	2.23873	-0.605989	-4.18657	15.9234	15.9191	15.5088	15.5584	15.7627	15.3476	15.0937	14.9442	0.00312849	0.00139176	58140.51;58140.51-3;58140.51-4	4	3	3	3	3	1	2	1
UBXN1	UBX domain-containing protein 1	Q04323	Q04323	-		+	1.36806	-0.605504	-2.56103	17.0474	16.7961	16.895	16.0353	16.7871	16.0209	16.1248	16.1742	1.05e-05	3.35e-05	33325.3	9	5	6	8	7	6	6	6
NDST1	Bifunctional heparan sulfate N-deacetylase/N-sulfotransferase 1	P52848	P52848	-		+	1.94283	-0.605459	-3.59703	15.187	15.446	15.7255	15.4171	15.0017	14.7266	14.6738	14.8496	0.0023619	0.00119551	100868	3	7	9	7	5	3	5	3
ZPR1	Zinc finger protein ZPR1	O75312	O75312	-		+	3.92356	-0.604683	-8.80292	16.6482	16.4802	16.4531	16.5022	16.5028	15.7738	16.0056	15.9585	3.62e-05	4.97e-05	50925.3	13	11	12	10	9	7	9	7
COMMD7	COMM domain-containing protein 7;Isoform 2 of COMM domain-containing protein 7	Q86VX2;Q86VX2-2	Q86VX2;Q86VX2-2	-		+	2.42517	-0.604528	-4.58343	15.7981	15.6046	15.7492	15.6024	15.2972	15.1544	15.0017	14.8612	0.00214709	0.00112382	22540.02;22540.02-2	3	2	3	2	2	3	2	2
SLC16A7	Monocarboxylate transporter 2	O60669	O60669	-		+	1.72601	-0.60404	-3.19184	15.4419	15.9656	15.623	16.1915	15.8615	15.3453	15.2766	15.0161	0.00253218	0.00125008	52200.2	1	1	1	1	1	1	2	1
PYCR3	Pyrroline-5-carboxylate reductase 3	Q53H96	Q53H96	-		+	3.08556	-0.603192	-6.18614	16.53	16.3271	16.4897	16.6332	16.2474	15.9013	15.8582	15.7673	0.00156	0.000868	28663.3	7	8	8	8	7	7	8	6
COX7A1	Cytochrome c oxidase subunit 7A1, mitochondrial	P24310	P24310	+	CIV subunits;Complex IV;OXPHOS;OXPHOS subunits		0.554239	-0.602981	-1.31802	NaN	NaN	16.9016	16.1502	NaN	16.1103	16.2867	15.3718	0.0031	0.00138	9117.52	NaN	NaN	2	2	NaN	1	1	1
N6AMT1	Methyltransferase N6AMT1	Q9Y5N5	Q9Y5N5	-			1.14678	-0.602503	-2.28243	17.283	17.4691	16.6213	16.8738	17.3188	NaN	16.492	16.5294	0.00266	0.00129	22957.4	1	1	1	2	1	NaN	1	1
CASP4	Caspase-4;Isoform 2 of Caspase-4	P49662;P49662-2	P49662;P49662-2	-		+	2.89189	-0.601995	-5.6806	14.927	15.3701	15.2111	15.2788	15.1785	14.5002	14.6809	14.5922	0.00493949	0.00213215	43262.24;43262.24-2	4	6	6	4	6	4	5	4
SRSF1	Serine/arginine-rich splicing factor 1	Q07955	Q07955	-		+	1.69772	-0.601897	-3.1404	19.5801	19.5518	19.4911	19.4909	19.6343	19.463	18.6847	18.6955	2.9e-06	3.26e-05	27744.6	11	11	12	12	11	11	10	12
OSTF1	Osteoclast-stimulating factor 1	Q92882	Q92882	-		+	1.9549	-0.601328	-3.62021	17.4152	16.9998	16.8718	16.7149	17.0615	16.3364	16.3286	16.569	8.05e-05	8.22e-05	23786.8	9	8	6	8	9	6	8	7
LRBA	Lipopolysaccharide-responsive and beige-like anchor protein;Isoform 2 of Lipopolysaccharide-responsive and beige-like anchor protein	P50851;P50851-2	P50851;P50851-2	-		+	4.55055	-0.600147	-11.3407	16.5039	16.567	16.5033	16.4128	16.3803	15.9489	15.8365	15.8346	0.00289	0.00133	319107.89;319107.89-2	2	3	3	5	3	5	6	5
DCTN2	Dynactin subunit 2;Isoform 2 of Dynactin subunit 2;Isoform 3 of Dynactin subunit 2	Q13561;Q13561-2;Q13561-3	Q13561;Q13561-2;Q13561-3	-		+	3.60935	-0.59947	-7.73117	18.328	18.351	18.1823	18.0528	18.1745	17.6032	17.6851	17.5664	3.5e-06	3.26e-05	44231;44231-2;44231-3	18	19	19	17	18	16	17	16
CDC42BPA	Serine/threonine-protein kinase MRCK alpha;Isoform 2 of Serine/threonine-protein kinase MRCK alpha;Isoform 3 of Serine/threonine-protein kinase MRCK alpha;Isoform 4 of Serine/threonine-protein kinase MRCK alpha;Isoform 5 of Serine/threonine-protein kinase MRCK alpha	Q5VT25;Q5VT25-2;Q5VT25-3;Q5VT25-4;Q5VT25-5	Q5VT25;Q5VT25-2;Q5VT25-3;Q5VT25-4;Q5VT25-5	-		+	3.36968	-0.598544	-6.98966	16.0861	16.032	16.1753	16.222	15.8601	15.4345	15.4943	15.5008	3.78e-05	5.07e-05	197306.92;197306.92-2;197306.92-3;197306.92-4;197306.92-5	13	16	19	17	11	12	14	12
ENPP1	Ectonucleotide pyrophosphatase/phosphodiesterase family member 1	P22413	P22413	-		+	1.45925	-0.598061	-2.71803	16.0553	16.0873	16.761	16.4894	16.8482	15.8586	15.8309	15.8611	0.000489433	0.000338538	104924	9	9	14	10	16	9	9	8
CBX1	Chromobox protein homolog 1	P83916	P83916	-		+	3.80078	-0.597506	-8.36984	16.7666	16.7644	16.6134	16.7238	16.8681	16.275	16.0816	16.0927	2.6e-05	4.27e-05	21417.8	4	5	4	4	4	4	4	4
LTF	Lactotransferrin;Isoform DeltaLf of Lactotransferrin	P02788;P02788-2	P02788;P02788-2	-			0.779534	-0.597103	-1.57582	17.8034	18.7553	18.5692	18.3125	17.1865	17.5096	17.5564	17.5187	5.74e-05	6.5e-05	78181.95;78181.95-2	3	2	2	2	3	3	3	3
ENDOD1	Endonuclease domain-containing 1 protein	O94919	O94919	-		+	1.88953	-0.596189	-3.49552	17.753	17.5418	17.31	17.125	17.3389	16.5742	16.8787	16.9997	0.000358	0.000261	55016.6	8	8	8	6	8	6	6	6
RMC1	Regulator of MON1-CCZ1 complex	Q96DM3	Q96DM3	-		+	2.06365	-0.595585	-3.83222	16.2571	16.407	16.5115	16.4079	15.9969	15.4494	15.831	15.8811	0.000521802	0.000356293	74974.6	3	3	3	7	2	4	3	3
H4C1	Histone H4	P62805	P62805			+	3.79918	-0.594618	-8.36431	20.4505	20.3929	20.3374	20.2686	20.4561	19.9012	19.8065	19.6518	2.69e-05	4.33e-05	11367.3	9	8	8	9	8	9	9	8
MGST1	Microsomal glutathione S-transferase 1	P10620	P10620	+	Detoxification;Metabolism;ROS and glutathione metabolism;Xenobiotic metabolism	+	2.08291	-0.594194	-3.87039	18.8424	18.6874	18.8948	18.8252	19.3545	18.2861	18.3926	18.3014	1.77e-05	3.62e-05	17598.7	4	4	4	4	6	4	4	4
ARPP19	cAMP-regulated phosphoprotein 19;Isoform ARPP-16 of cAMP-regulated phosphoprotein 19	P56211;P56211-2	P56211;P56211-2	-			0.742977	-0.592788	-1.51428	16.854	16.2099	16.1363	15.229	16.4148	15.7255	15.1309	15.8717	0.00138418	0.000789035	12322.97;12322.97-2	2	2	2	1	1	1	1	1
MRPS24	28S ribosomal protein S24, mitochondrial	Q96EL2	Q96EL2	+	Mitochondrial central dogma;Mitochondrial ribosome;SSU;Translation	+	2.55746	-0.592037	-4.87852	16.7846	16.6026	16.6443	16.4037	16.3578	15.8116	16.0941	15.994	0.00205989	0.00109321	19015.1	3	3	2	2	2	1	1	3
DDX50	ATP-dependent RNA helicase DDX50	Q9BQ39	Q9BQ39	-		+	2.90516	-0.592037	-5.71422	16.6299	16.3641	16.1469	16.4217	16.4386	15.8113	15.8237	15.7896	0.000198361	0.000159672	82565	11	10	8	12	10	10	8	10
GLS	Isoform 3 of Glutaminase kidney isoform, mitochondrial	O94925-3	O94925-3	+	Amino acid metabolism;Glutamate metabolism;Metabolism	+	3.26377	-0.591829	-6.68105	17.6114	17.5342	17.9161	17.7192	17.7588	17.0934	17.1588	17.0961	5.89e-05	6.59e-05	65460	3	3	3	3	3	3	3	3
XIAP	E3 ubiquitin-protein ligase XIAP	P98170	P98170	-		+	1.76302	-0.591558	-3.2596	16.2749	16.0087	16.2602	16.1328	16.0907	15.2394	15.4377	16.0086	0.00307	0.00138	56684.9	4	3	5	2	6	2	4	3
ANXA5	Annexin A5	P08758	P08758	-		+	2.70821	-0.589798	-5.22963	20.9954	20.9019	20.8371	20.5474	20.6268	20.2141	20.1925	20.1691	2.61e-06	3.26e-05	35936.8	25	25	25	24	24	25	23	25
GSS	Glutathione synthetase	P48637	P48637	-		+	5.01726	-0.589422	-13.6479	17.7733	17.7168	17.8009	17.6873	17.628	17.1235	17.1048	17.1672	9.83e-06	3.34e-05	52384.8	18	17	19	19	17	12	15	13
NDC80	Kinetochore protein NDC80 homolog	O14777	O14777	-			1.12142	-0.588803	-2.14516	16.1648	17.0524	17.0441	16.1441	16.3696	16.0267	15.9378	15.9341	0.0029107	0.00133838	73912.7	3	3	1	5	4	2	2	3
PDCD5	Programmed cell death protein 5	O14737	O14737	-			0.752753	-0.587792	-1.53077	16.6638	16.6158	16.5207	15.1342	16.2736	15.512	15.7753	15.6742	0.000157875	0.000133657	14285.1	5	5	5	1	5	4	3	3
PNKP	Bifunctional polynucleotide phosphatase/kinase	Q96T60	Q96T60	-			0.735734	-0.586852	-1.50205	16.0379	16.1343	15.8702	16.1968	16.3057	15.4257	14.6775	16.4631	0.0032	0.00141	57076.4	4	4	1	2	4	1	2	2
PBK	Lymphokine-activated killer T-cell-originated protein kinase;Isoform 2 of Lymphokine-activated killer T-cell-originated protein kinase	Q96KB5;Q96KB5-2	Q96KB5;Q96KB5-2	-			0.490133	-0.585832	-1.09486	16.588	15.14	NaN	15.6941	16.6225	15.1798	16.1796	14.9166	0.0023766	0.00120094	36085.04;36085.04-2	5	5	NaN	3	7	3	2	2
SGTA	Small glutamine-rich tetratricopeptide repeat-containing protein alpha	O43765	O43765	-		+	2.06153	-0.58572	-3.82804	17.0112	17.2764	17.0472	16.5745	17.0118	16.454	16.375	16.3664	0.00038814	0.000279375	34063.1	7	7	8	7	7	5	6	6
DDHD2	Phospholipase DDHD2	O94830	O94830	-		+	1.40569	-0.585405	-2.62556	15.457	15.3353	15.8195	15.0029	15.5281	14.5441	14.8034	15.1819	0.00877991	0.00370447	81031.8	4	4	2	2	1	3	1	1
MAPRE3	Microtubule-associated protein RP/EB family member 3	Q9UPY8	Q9UPY8	-		+	2.94589	-0.585017	-5.81833	16.3321	16.282	16.2782	16.2227	16.5419	15.7333	15.5915	15.9143	0.00044988	0.000316512	31982.2	6	6	5	5	7	1	2	3
NDUFA12	NADH dehydrogenase [ubiquinone] 1 alpha subcomplex subunit 12	Q9UI09	Q9UI09	+	CI subunits;Complex I;OXPHOS;OXPHOS subunits	+	2.84113	-0.584758	-5.5533	18.2098	18.5728	18.4231	18.3376	18.3338	17.8618	17.6046	17.9056	1.6e-05	3.55e-05	17114.4	3	2	3	4	3	3	3	3
KIF3A	Kinesin-like protein KIF3A	Q9Y496	Q9Y496	-			0.709993	-0.584652	-1.45847	15.8063	15.9672	15.8227	16.0236	15.9184	15.8018	14.2382	15.929	0.00277206	0.00131575	80040.8	5	5	5	6	4	3	4	2
CFAP20	Cilia- and flagella-associated protein 20	Q9Y6A4	Q9Y6A4	-		+	2.75383	-0.583645	-5.33917	16.4588	16.6851	16.1697	16.4211	16.4085	15.8562	15.8332	15.8455	0.00321728	0.00142261	22774.4	3	2	2	2	3	1	3	4
MRPS21	28S ribosomal protein S21, mitochondrial	P82921	P82921	+	Mitochondrial central dogma;Mitochondrial ribosome;SSU;Translation	+	1.90509	-0.583296	-3.52502	17.1725	17.056	17.0159	16.8174	16.7669	16.4776	16.6345	16.0352	0.00255	0.00126	10688.5	2	2	2	3	2	2	1	2
PIR	Pirin	O00625	O00625	-		+	1.68008	-0.582334	-3.10849	16.2458	16.406	16.7423	16.3176	15.8931	15.6206	15.7833	15.8119	0.00289	0.00133	32113.4	2	2	2	1	1	2	2	2
RING1	E3 ubiquitin-protein ligase RING1	Q06587	Q06587	-		+	3.33493	-0.581908	-6.88716	16.1808	16.0724	16.1654	16.0031	16.2302	15.5762	15.3832	15.6861	0.000775	0.000488	42429.3	3	4	3	2	3	1	1	1
PAXX	Protein PAXX	Q9BUH6	Q9BUH6	-		+	1.60248	-0.58161	-2.96944	15.8929	16.3998	16.5755	16.1162	16.1074	15.3365	15.8469	15.7269	6.23e-05	6.87e-05	21639.5	6	7	8	7	6	4	5	5
GSTT1	Glutathione S-transferase theta-1	P30711	P30711	-		+	2.73324	-0.581427	-5.28954	16.6987	16.6649	16.4719	16.9529	16.6445	16.0121	16.1937	16.1098	2.63e-05	4.29e-05	27335	7	5	6	8	8	5	5	5
HSPG2	Basement membrane-specific heparan sulfate proteoglycan core protein	P98160	P98160	-		+	1.68717	-0.58084	-3.12131	16.1778	16.0063	15.8873	15.5975	16.4225	15.377	15.446	15.4894	0.00033207	0.000245589	468830	28	26	22	21	31	16	16	15
NPR2	Atrial natriuretic peptide receptor 2;Isoform Short of Atrial natriuretic peptide receptor 2	P20594;P20594-2	P20594;P20594-2	-			0.594207	-0.580803	-1.28666	17.3007	15.6627	15.9213	NaN	16.1808	15.8253	15.8955	15.3359	0.0023	0.00118	117022.08;117022.08-2	1	3	4	NaN	3	2	2	4
EXOSC6	Exosome complex component MTR3	Q5RKV6	Q5RKV6	-		+	1.43434	-0.580435	-2.67493	16.2165	16.071	15.4675	15.7191	16.3298	15.4411	15.4161	15.2838	0.000122481	0.000109895	28235.1	6	5	7	9	7	5	6	7
ATP5ME	ATP synthase subunit e, mitochondrial	P56385	P56385	+	Complex V;Cristae formation;CV subunits;Mitochondrial dynamics and surveillance;OXPHOS;OXPHOS subunits	+	3.25196	-0.580352	-6.6473	17.5312	17.5014	17.464	17.2002	17.5133	16.7916	16.859	16.9344	3.94e-05	5.15e-05	7933.21	5	5	5	5	5	3	4	4
PARK7	Parkinson disease protein 7	Q99497	Q99497	+	Protein import, sorting and homeostasis;Autophagy;Mitochondrial dynamics and surveillance;Mitophagy;Protein homeostasis	+	3.06658	-0.579988	-6.13516	18.1022	18.4008	18.481	18.4126	18.3019	17.8377	17.6728	17.7685	3.52e-06	3.26e-05	19891	14	15	14	14	14	14	14	14
SCRN3	Secernin-3;Isoform 2 of Secernin-3	Q0VDG4;Q0VDG4-2	Q0VDG4;Q0VDG4-2	-		+	3.16448	-0.579435	-6.40165	15.5967	15.7117	15.8629	15.6631	15.5987	15.1993	15.1864	14.9359	0.000806526	0.000504079	48544.32;48544.32-2	2	4	4	3	3	1	1	1
TRAPPC11	Trafficking protein particle complex subunit 11;Isoform 3 of Trafficking protein particle complex subunit 11;Isoform 4 of Trafficking protein particle complex subunit 11	Q7Z392;Q7Z392-3;Q7Z392-4	Q7Z392;Q7Z392-3;Q7Z392-4	-		+	1.70671	-0.57943	-3.15671	15.4317	15.4981	15.5951	15.1466	15.0656	14.4376	14.9801	14.8863	0.000226593	0.000178108	128880.7;128880.7-3;128880.7-4	5	2	4	2	4	3	8	5
TRMT61A	tRNA (adenine(58)-N(1))-methyltransferase catalytic subunit TRMT61A	Q96FX7	Q96FX7	-		+	1.99314	-0.579063	-3.69411	16.5649	16.138	16.2687	16.0086	16.2333	15.8972	15.657	15.4367	0.00107	0.000638	31381.7	1	2	1	2	2	2	2	2
RABEP1	Rab GTPase-binding effector protein 1	Q15276	Q15276	-		+	2.53572	-0.577932	-4.82922	15.8903	16.0986	16.1343	16.1396	15.8633	15.4948	15.6271	15.2199	0.001755	0.000959903	99290.4	8	10	11	10	10	5	6	6
MICU2	Calcium uptake protein 2, mitochondrial	Q8IYU8	Q8IYU8	+	Calcium cycle;Calcium homeostasis;Calcium uniporter;EF hand proteins;Signaling;Small molecule transport	+	2.77304	-0.577562	-5.38579	16.3158	16.2796	15.9811	16.3476	16.4269	15.6287	15.7836	15.6656	0.000980011	0.000591495	49666.2	3	4	2	2	5	2	5	2
LZTR1	Leucine-zipper-like transcriptional regulator 1	Q8N653	Q8N653	-		+	1.6897	-0.575561	-3.12587	16.262	16.3005	16.1848	16.4228	16.0443	16.0941	15.3329	15.5749	0.00763129	0.00324677	94718.9	4	5	2	4	5	3	4	4
RND3	Rho-related GTP-binding protein RhoE	P61587	P61587	-		+	1.33258	-0.574846	-2.50051	17.1682	17.1315	16.3374	17.3303	17.0207	16.415	16.4396	16.4137	6.44e-05	7e-05	27368.2	7	7	6	8	7	7	6	7
ATIC	Bifunctional purine biosynthesis protein ATIC	P31939	P31939	mito-interacting		+	3.26514	-0.574367	-6.68495	18.1724	18.3924	18.5222	18.2201	18.4049	17.7627	17.7563	17.7852	2.42e-06	3.26e-05	64615.9	33	34	34	32	33	30	30	30
KDELR2	ER lumen protein-retaining receptor 2	P33947	P33947	-			0.908697	-0.574348	-1.7915	17.4802	17.618	18.0803	18.1395	17.5564	17.7524	16.5283	17.321	0.000363147	0.000264356	24422	2	2	2	2	2	2	2	2
SRP19	Signal recognition particle 19 kDa protein	P09132	P09132	-		+	4.21859	-0.573999	-9.92524	17.6736	17.6947	17.7561	17.6554	17.7528	17.2496	17.0083	17.1398	7.59e-05	7.85e-05	16155.7	2	2	2	2	2	2	3	3
MRPL43	39S ribosomal protein L43, mitochondrial;Isoform 2 of 39S ribosomal protein L43, mitochondrial;Isoform 3 of 39S ribosomal protein L43, mitochondrial;Isoform 4 of 39S ribosomal protein L43, mitochondrial;Isoform 5 of 39S ribosomal protein L43, mitochondrial;Isoform 6 of 39S ribosomal protein L43, mitochondrial	Q8N983;Q8N983-2;Q8N983-3;Q8N983-4;Q8N983-6;Q8N983-7	Q8N983;Q8N983-2;Q8N983-3;Q8N983-4;Q8N983-6;Q8N983-7	+	LSU;Mitochondrial central dogma;Mitochondrial ribosome;Translation	+	3.62119	-0.573822	-7.76942	16.6646	16.7972	16.5662	16.5391	16.7327	16.0363	16.04	16.1821	0.00117065	0.000686377	23430.8;23430.8-2;23430.8-3;23430.8-4;23430.8-6;23430.8-7	2	3	4	4	3	2	3	1
PSMC2	26S proteasome regulatory subunit 7	P35998	P35998	-		+	5.64839	-0.57325	-17.4818	18.097	18.1268	18.0996	18.0456	18.1195	17.5566	17.4513	17.5654	9.49e-06	3.34e-05	48633.8	27	26	27	27	27	21	24	25
DRAP1	Dr1-associated corepressor;Isoform 2 of Dr1-associated corepressor	Q14919;Q14919-2	Q14919;Q14919-2	-		+	3.00987	-0.572637	-5.98472	16.9863	16.8841	16.7686	16.7541	16.8458	16.0659	16.3503	16.4093	0.000379144	0.000273742	22349.84;22349.84-2	4	4	4	5	5	4	3	3
RAB3B	Ras-related protein Rab-3B	P20337	P20337	-			1.16068	-0.572507	-2.21072	17.6826	17.933	17.0588	17.2372	18.0596	16.9936	17.0394	17.0322	1.18e-05	3.36e-05	24757.9	5	4	5	5	5	5	5	4
DGKA	Diacylglycerol kinase alpha	P23743	P23743	-		+	3.55569	-0.572173	-7.55972	16.1678	16.0713	15.8401	15.9914	16.0919	15.4415	15.4393	15.5002	6.87e-05	7.29e-05	82630.2	15	16	13	15	15	6	10	10
THY1	Thy-1 membrane glycoprotein	P04216	P04216	-		+	1.83495	-0.572118	-3.39289	19.6007	20.318	20.1742	19.8366	20.0375	19.4338	19.4349	19.3952	4.17e-05	5.34e-05	17934.7	3	3	3	3	3	3	3	3
MICU1	Calcium uptake protein 1, mitochondrial;Isoform 3 of Calcium uptake protein 1, mitochondrial	Q9BPX6;Q9BPX6-3	Q9BPX6;Q9BPX6-3	+	Calcium cycle;Calcium homeostasis;Calcium uniporter;EF hand proteins;Signaling;Small molecule transport	+	3.36326	-0.571645	-6.97062	15.7264	15.753	15.6244	15.5892	15.5996	14.9385	15.0619	15.2602	0.0033574	0.00147481	54351.28;54351.28-3	4	4	4	4	3	2	3	3
SAFB	Scaffold attachment factor B1;Isoform 3 of Scaffold attachment factor B1;Isoform 4 of Scaffold attachment factor B1	Q15424;Q15424-3;Q15424-4	Q15424;Q15424-3;Q15424-4	-		+	5.0891	-0.571441	-14.04	16.6657	16.5916	16.5186	16.5824	16.624	16.0882	16.0135	15.9733	3.57e-06	3.26e-05	102641.57;102641.57-3;102641.57-4	16	15	13	14	15	11	12	11
MSN	Moesin	P26038	P26038	-		+	2.24255	-0.57143	-4.19449	19.1039	18.662	18.7402	18.5793	19.0111	18.2765	18.2577	18.2094	2.41e-06	3.26e-05	67820	34	35	35	33	36	34	34	35
YKT6	Synaptobrevin homolog YKT6	O15498	O15498	-		+	5.63479	-0.571294	-17.3893	17.7903	17.8592	17.8539	17.7933	17.8021	17.1837	17.3058	17.2559	2.37e-05	4.11e-05	22417.6	10	10	11	11	11	10	10	11
MRPL23	39S ribosomal protein L23, mitochondrial	Q16540	Q16540	+	LSU;Mitochondrial central dogma;Mitochondrial ribosome;Translation	+	3.64975	-0.571196	-7.86239	16.9639	17.1136	16.9593	17.0007	17.1517	16.3338	16.5084	16.5576	2.18e-05	3.95e-05	17781.2	5	5	5	5	5	3	3	3
SELENOO	Protein adenylyltransferase SelO, mitochondrial	Q9BVL4	Q9BVL4	+	Detoxification;Metabolism;Selenoproteins		1.24395	-0.571005	-2.46293	15.5617	14.8468	15.4786	15.2344	15.5751	NaN	14.7142	14.8224	0.000581588	0.00038845	73489.3	3	4	2	2	4	NaN	2	3
MAK16	Protein MAK16 homolog	Q9BXY0	Q9BXY0	-			0.464679	-0.569717	-1.04707	16.227	15.0309	16.6576	16.7281	16.7361	NaN	15.7188	15.6936	0.00144	0.000816	35368.6	4	2	5	3	2	NaN	1	1
ENSA	Alpha-endosulfine;Isoform 2 of Alpha-endosulfine;Isoform 3 of Alpha-endosulfine;Isoform 4 of Alpha-endosulfine;Isoform 5 of Alpha-endosulfine;Isoform 6 of Alpha-endosulfine;Isoform 7 of Alpha-endosulfine;Isoform 9 of Alpha-endosulfine	O43768;O43768-2;O43768-3;O43768-4;O43768-5;O43768-6;O43768-7;O43768-9	O43768;O43768-2;O43768-3;O43768-4;O43768-5;O43768-6;O43768-7;O43768-9	-			0.37141	-0.569399	-0.867779	16.8808	15.3262	16.7535	15.1428	16.8416	NaN	15.5387	15.7004	0.000625434	0.000411678	13389.01;13389.01-2;13389.01-3;13389.01-4;13389.01-5;13389.01-6;13389.01-7;13389.01-9	3	2	3	1	3	NaN	1	3
NOSIP	Nitric oxide synthase-interacting protein	Q9Y314	Q9Y314	-		+	1.5401	-0.568998	-2.85915	16.4253	16.3915	16.1636	15.6617	16.0197	15.5387	15.4076	15.7438	0.000466505	0.000326018	33172	7	6	4	3	5	5	6	4
UCHL1	Ubiquitin carboxyl-terminal hydrolase isozyme L1	P09936	P09936	-		+	3.76801	-0.567677	-8.25741	18.3372	18.4296	18.3887	18.2346	18.5397	17.8289	17.846	17.7799	2.85e-06	3.26e-05	24824.3	14	14	14	13	14	10	12	13
NDUFB10	NADH dehydrogenase [ubiquinone] 1 beta subcomplex subunit 10	O96000	O96000	+	CI subunits;Complex I;OXPHOS;OXPHOS subunits	+	5.12545	-0.567409	-14.2424	17.9136	17.9699	18.0283	17.9265	17.863	17.3774	17.3365	17.4046	0.000139988	0.000121458	20776.7	6	6	6	5	5	3	4	3
CDC27	Cell division cycle protein 27 homolog;Isoform 2 of Cell division cycle protein 27 homolog	P30260;P30260-2	P30260;P30260-2	-		+	2.89794	-0.567241	-5.6959	15.2573	15.3014	15.353	15.3675	15.2472	14.8029	14.9217	14.4895	0.0024247	0.00121769	91867.33;91867.33-2	6	5	5	7	6	5	4	6
CREB1	Cyclic AMP-responsive element-binding protein 1;Isoform CREB-B of Cyclic AMP-responsive element-binding protein 1;Isoform 3 of Cyclic AMP-responsive element-binding protein 1	P16220;P16220-2;P16220-3	P16220;P16220-2;P16220-3	-		+	1.94165	-0.566761	-3.59477	16.966	16.955	17.0894	16.4546	17.0164	16.4497	16.2319	16.3069	0.00171	0.000937	36688.09;36688.09-2;36688.09-3	2	2	2	2	2	2	2	2
NAV1	Neuron navigator 1;Isoform 2 of Neuron navigator 1;Isoform 3 of Neuron navigator 1	Q8NEY1;Q8NEY1-2;Q8NEY1-3	Q8NEY1;Q8NEY1-2;Q8NEY1-3	-		+	1.43901	-0.566751	-2.683	15.626	14.8872	15.1071	14.7905	15.2224	14.7788	14.4297	14.4711	0.000805	0.000503	202471.75;202471.75-2;202471.75-3	16	11	8	3	10	2	3	5
TUBGCP2	Gamma-tubulin complex component 2;Isoform 3 of Gamma-tubulin complex component 2	Q9BSJ2;Q9BSJ2-4	Q9BSJ2;Q9BSJ2-4	-		+	2.80725	-0.566315	-5.46948	16.1794	16.1427	15.962	16.0798	16.0607	15.2703	15.634	15.6515	6.13e-05	6.79e-05	102534.03;102534.03-4	18	17	14	15	15	11	11	11
SORBS3	Vinexin;Isoform Beta of Vinexin	O60504;O60504-2	O60504;O60504-2	-		+	1.86816	-0.564601	-3.45519	17.1175	16.9651	17.3494	16.6197	16.8585	16.4072	16.416	16.4292	4.26e-05	5.41e-05	75341.07;75341.07-2	13	13	13	12	14	13	12	12
PLXNA3	Plexin-A3	P51805	P51805	-			1.29598	-0.563505	-2.43836	15.635	15.798	14.8596	15.5044	15.6016	14.8897	14.7367	15.1223	0.00119444	0.000697699	207703	2	5	1	3	2	3	4	2
LASP1	LIM and SH3 domain protein 1;Isoform 2 of LIM and SH3 domain protein 1	Q14847;Q14847-2	Q14847;Q14847-2	-			1.12189	-0.562815	-2.14593	18.4054	18.4283	18.2938	17.4941	18.5578	17.8318	17.6743	17.5131	1.02e-05	3.35e-05	29717.16;29717.16-2	10	9	10	10	10	6	6	8
DOK1	Docking protein 1	Q99704	Q99704	-		+	2.01791	-0.561974	-3.74233	16.4643	16.2756	16.4602	16.1147	15.949	15.7719	15.7989	15.5015	0.00152367	0.000853985	52391.8	6	5	6	2	5	1	2	2
MLF2	Myeloid leukemia factor 2	Q15773	Q15773	-		+	1.32383	-0.561066	-2.48562	16.1624	15.872	15.4725	15.5644	16.02	15.2508	15.5974	14.9234	0.000159	0.000134	28147.3	3	2	3	3	3	2	1	4
MT-CO2	Cytochrome c oxidase subunit 2	P00403	P00403	+	CIV subunits;Complex IV;OXPHOS;OXPHOS subunits	+	5.02815	-0.561008	-13.7067	18.894	19.0209	18.9936	18.9201	18.9409	18.3331	18.3873	18.4583	2.16e-05	3.93e-05	25565	5	5	5	5	5	5	5	5
GEMIN4	Gem-associated protein 4	P57678	P57678	-		+	1.86508	-0.560483	-3.44939	15.658	15.6393	15.3926	15.6329	15.705	15.3076	15.1724	14.6552	0.00121	0.000704	120037	6	7	6	10	10	6	3	4
TAGLN2	Transgelin-2;Isoform 2 of Transgelin-2	P37802;P37802-2	P37802;P37802-2	-		+	1.87347	-0.56018	-3.46518	19.421	19.3413	19.4157	18.7753	19.1702	18.6809	18.6629	18.6498	6.02e-06	3.26e-05	22391.44;22391.44-2	14	14	14	11	14	12	12	13
NDRG1	Protein NDRG1	Q92597	Q92597	-			0.709417	-0.560104	-1.4575	18.3336	17.6289	18.5019	16.8895	17.7599	17.3333	17.1292	17.3255	1.21e-05	3.37e-05	42835.4	7	8	7	7	7	6	6	7
NDUFB9	NADH dehydrogenase [ubiquinone] 1 beta subcomplex subunit 9	Q9Y6M9	Q9Y6M9	+	CI subunits;Complex I;OXPHOS;OXPHOS subunits	+	3.17227	-0.560081	-6.42322	17.0389	17.084	17.1888	17.0039	16.7993	16.4172	16.5024	16.469	0.00173011	0.000948118	21830.9	6	6	7	6	5	6	5	6
PIEZO1	Piezo-type mechanosensitive ion channel component 1	Q92508	Q92508	-		+	3.69987	-0.55949	-8.02779	16.5253	16.5151	16.3894	16.3451	16.5977	15.8302	15.9727	15.9423	0.000398392	0.000285437	286790	14	13	10	14	15	10	12	15
NDUFC2	NADH dehydrogenase [ubiquinone] 1 subunit C2	O95298	O95298	+	CI subunits;Complex I;OXPHOS;OXPHOS subunits	+	3.09347	-0.558519	-6.20748	16.5456	16.6479	16.7526	16.5431	16.3951	15.9859	16.1305	15.9386	5.72e-05	6.48e-05	14187.5	7	7	7	7	7	6	7	6
FUBP1	Isoform 2 of Far upstream element-binding protein 1	Q96AE4-2	Q96AE4-2	-		+	3.58928	-0.5584	-7.66666	18.1246	18.0532	17.8817	17.9311	18.0714	17.3946	17.4032	17.5642	2.71e-06	3.26e-05	68604.7	19	19	19	19	21	16	16	16
VCL	Vinculin;Isoform 1 of Vinculin	P18206;P18206-2	P18206;P18206-2	-		+	3.50804	-0.558382	-7.41017	19.5419	19.3469	19.1904	19.373	19.3648	18.8246	18.8191	18.7714	4.21e-06	3.26e-05	123799.3;123799.3-2	61	59	61	58	62	56	59	60
ARSA	Arylsulfatase A;Isoform 2 of Arylsulfatase A	P15289;P15289-2	P15289;P15289-2	-		+	2.0097	-0.557945	-3.72632	17.664	18.088	18.2235	18.2677	17.9079	17.4902	17.4107	17.5159	5.48e-05	6.29e-05	53588.16;53588.16-2	7	6	7	7	7	7	7	7
MTRR	Methionine synthase reductase;Isoform A of Methionine synthase reductase	Q9UBK8;Q9UBK8-1	Q9UBK8;Q9UBK8-1	-		+	1.75642	-0.557919	-3.24747	15.6982	15.3965	15.6999	15.5127	15.8623	15.2627	15.2547	14.7106	0.000575196	0.000384999	77673.76;77673.76-1	3	2	4	2	5	3	3	4
EIF2B2	Translation initiation factor eIF-2B subunit beta	P49770	P49770	-		+	2.77063	-0.557515	-5.37991	16.7961	16.771	16.6016	16.6066	16.6889	16.2623	16.2509	15.8929	4.14e-06	3.26e-05	38989.6	10	9	8	7	8	6	8	5
SEC16A	Protein transport protein Sec16A;Isoform 2 of Protein transport protein Sec16A;Isoform 3 of Protein transport protein Sec16A;Isoform 4 of Protein transport protein Sec16A;Isoform 5 of Protein transport protein Sec16A	O15027;O15027-2;O15027-3;O15027-4;O15027-5	O15027;O15027-2;O15027-3;O15027-4;O15027-5	-		+	3.89314	-0.557243	-8.69387	16.3025	16.3538	16.5254	16.3514	16.4759	15.7644	15.8612	15.9081	3.88e-05	5.13e-05	251893.64;251893.64-2;251893.64-3;251893.64-4;251893.64-5	24	20	24	19	23	6	9	10
HMOX2	Heme oxygenase 2	P30519	P30519	-		+	3.46615	-0.556931	-7.28072	17.5616	17.4464	17.3587	17.449	17.2924	16.7493	16.8763	16.9685	0.000137856	0.000120026	36032.9	8	9	5	6	8	5	5	6
ADD3	Isoform 1 of Gamma-adducin	Q9UEY8-2	Q9UEY8-2	-		+	2.0947	-0.556708	-3.89386	17.3894	17.2616	17.7501	17.1103	17.4017	16.8869	16.7898	16.801	1.04e-05	3.35e-05	75671	14	14	13	10	12	8	10	10
AK3	GTP:AMP phosphotransferase AK3, mitochondrial	Q9UIJ7	Q9UIJ7	+	Metabolism;Nucleotide metabolism;Nucleotide synthesis and processing	+	4.36698	-0.555361	-10.5368	17.2989	17.3446	17.4322	17.4405	17.2919	16.7316	16.8796	16.8076	1.3e-05	3.39e-05	25565.4	13	14	14	14	14	10	11	14
EHD1	EH domain-containing protein 1	Q9H4M9	Q9H4M9	-		+	2.40049	-0.555066	-4.52967	18.2502	18.4848	17.9867	18.0413	18.3267	17.6655	17.652	17.6711	2.5e-06	3.26e-05	60626.9	24	24	22	23	23	22	21	21
MPI	Mannose-6-phosphate isomerase	P34949	P34949	-		+	2.05778	-0.55462	-3.82064	16.5069	16.7443	17.1165	16.8316	16.8292	16.0851	16.2846	16.3835	1.44e-05	3.47e-05	46655.9	6	5	6	5	6	4	4	5
PREPL	Prolyl endopeptidase-like;Isoform 2 of Prolyl endopeptidase-like;Isoform 4 of Prolyl endopeptidase-like	Q4J6C6;Q4J6C6-2;Q4J6C6-4	Q4J6C6;Q4J6C6-2;Q4J6C6-4	+	0	+	2.38633	-0.554387	-4.49899	16.3047	16.1819	16.0116	16.4521	16.462	15.6736	15.8587	15.6519	0.00276	0.00131	83926.96;83926.96-2;83926.96-4	3	4	3	6	4	3	3	4
PHPT1	14 kDa phosphohistidine phosphatase	Q9NRX4	Q9NRX4	-		+	2.34153	-0.553251	-4.40276	17.2005	17.466	17.7168	17.4396	17.2967	16.7467	16.9515	16.9137	4.32e-05	5.47e-05	13832.5	3	3	3	3	3	3	3	3
BTF3L4	Transcription factor BTF3 homolog 4	Q96K17	Q96K17	-		+	1.64714	-0.552783	-3.04919	16.7449	17.1504	17.4734	17.3256	16.8856	16.5405	16.5229	16.6263	0.000840608	0.000521066	17270.5	4	5	6	8	6	4	5	5
ANGPTL2	Angiopoietin-related protein 2	Q9UKU9	Q9UKU9	-		+	1.35205	-0.551845	-2.53368	16.3335	16.5155	16.1458	16.142	16.0099	16.0373	15.1943	15.801	0.000665	0.000434	57104.4	2	4	4	4	5	7	4	6
AIP	AH receptor-interacting protein	O00170	O00170	-		+	2.14285	-0.551265	-3.99044	16.7198	16.7507	16.6999	16.198	16.6672	16.0214	16.0734	16.0727	4.39e-05	5.51e-05	37636	11	12	10	11	13	8	11	9
ALAD	Delta-aminolevulinic acid dehydratase;Isoform 2 of Delta-aminolevulinic acid dehydratase	P13716;P13716-2	P13716;P13716-2	-		+	2.5174	-0.551205	-4.78793	17.3719	17.3515	17.1644	17.1534	16.9486	16.5352	16.7777	16.6273	2.62e-05	4.29e-05	36294.87;36294.87-2	10	7	8	9	7	6	5	6
TTC1	Tetratricopeptide repeat protein 1	Q99614	Q99614	-		+	5.7776	-0.550747	-18.3854	16.4963	16.552	16.5462	16.54	16.5743	16.0308	15.9239	16.0184	9.11e-05	8.94e-05	33526.1	9	9	9	9	9	8	7	8
RPS27L	40S ribosomal protein S27-like	Q71UM5	Q71UM5	-		+	3.46788	-0.550744	-7.28603	18.0819	18.2397	18.194	17.9903	18.2444	17.652	17.4985	17.6475	1.39e-05	3.43e-05	9477.16	5	5	5	5	5	3	3	3
CCDC22	Coiled-coil domain-containing protein 22	O60826	O60826	-		+	4.47226	-0.550072	-10.9912	16.5124	16.5701	16.7045	16.5166	16.5285	16.0496	16.0171	15.9823	0.00051727	0.000353922	70755.6	12	14	14	14	13	8	8	11
ATL2	Atlastin-2;Isoform 3 of Atlastin-2;Isoform 5 of Atlastin-2	Q8NHH9;Q8NHH9-3;Q8NHH9-5	Q8NHH9;Q8NHH9-3;Q8NHH9-5	-		+	3.73771	-0.550015	-8.15462	15.9752	15.8411	15.8169	15.7071	15.7132	15.2692	15.219	15.2939	0.000970162	0.000586458	66229.18;66229.18-3;66229.18-5	5	3	3	3	5	3	3	4
ZC3H11A	Zinc finger CCCH domain-containing protein 11A	O75152	O75152	-		+	3.02309	-0.549975	-6.01953	15.2294	15.3924	15.1642	15.3191	15.3303	14.6473	14.9392	14.6249	0.00286446	0.00133046	89131.1	3	4	3	2	3	4	2	2
BIRC6	Baculoviral IAP repeat-containing protein 6	Q9NR09	Q9NR09	-		+	2.37596	-0.548859	-4.4766	15.4878	15.4688	15.2824	15.2587	15.1818	14.6933	14.6307	15.0372	0.000848	0.000525	530255	20	18	13	11	17	9	13	8
HSDL2	Hydroxysteroid dehydrogenase-like protein 2	Q6YN16	Q6YN16	+	0	+	1.91509	-0.548621	-3.54405	17.0314	16.5735	16.5838	16.6223	17.0895	16.2378	16.1807	16.276	8.6e-05	8.61e-05	45394.7	15	15	14	11	14	10	11	11
AK6	Adenylate kinase isoenzyme 6	Q9Y3D8	Q9Y3D8	-		+	3.04011	-0.547869	-6.06457	16.5999	16.4469	16.4435	16.2573	16.4709	16.0376	15.8548	15.7951	0.00207143	0.00109677	20061.5	3	4	4	4	3	2	2	2
CRK	Adapter molecule crk	P46108	P46108	-		+	3.94712	-0.546902	-8.88823	17.522	17.2484	17.4271	17.421	17.3814	16.8149	16.8948	16.8497	1.86e-05	3.67e-05	33830.7	11	13	13	11	13	10	11	10
NOP53	Ribosome biogenesis protein NOP53	Q9NZM5	Q9NZM5	-		+	2.45118	-0.546875	-4.64053	15.4593	15.3571	15.5804	15.5804	15.5112	14.6673	15.11	15.075	0.00267901	0.00129122	54389.2	3	3	4	4	4	2	1	2
TMEM35A	Transmembrane protein 35A	Q53FP2	Q53FP2	-			0.35098	-0.546568	-0.816004	16.8372	17.002	14.8763	15.3318	17.3954	15.4816	15.8901	15.8543	0.000584016	0.000389455	18440.2	2	2	1	1	2	1	1	1
HDHD3	Haloacid dehalogenase-like hydrolase domain-containing protein 3	Q9BSH5	Q9BSH5	+	0		0.531179	-0.54515	-1.40852	15.8971	16.5084	NaN	NaN	NaN	NaN	15.895	15.4202	0.00465971	0.00201398	28000	1	1	NaN	NaN	NaN	NaN	1	2
KRT7	Keratin, type II cytoskeletal 7	P08729	P08729	-			0.506558	-0.545133	-1.105	17.0799	16.6312	18.6489	17.4904	16.8921	17.0343	16.4124	16.9634	2.62e-05	4.29e-05	51385.7	2	3	22	12	7	6	5	6
MRPS2	28S ribosomal protein S2, mitochondrial	Q9Y399	Q9Y399	+	Mitochondrial central dogma;Mitochondrial ribosome;SSU;Translation	+	2.66924	-0.544952	-5.13729	17.2075	16.9897	17.235	16.9687	16.9858	16.6974	16.5397	16.3601	7.35e-05	7.67e-05	33249.2	3	3	2	3	3	2	3	2
VASP	Vasodilator-stimulated phosphoprotein	P50552	P50552	-		+	2.52479	-0.544896	-4.80454	17.9625	17.6023	17.8149	17.479	17.6507	17.1463	17.1335	17.1911	9.62e-07	3.26e-05	39829.7	11	12	11	11	10	8	8	8
OSBPL2	Oxysterol-binding protein-related protein 2;Isoform 2 of Oxysterol-binding protein-related protein 2	Q9H1P3;Q9H1P3-2	Q9H1P3;Q9H1P3-2	-		+	1.65049	-0.544462	-3.05522	15.0359	15.1843	15.2102	15.3937	14.708	14.7144	14.3135	14.6578	0.0011	0.000655	55201.27;55201.27-2	4	3	6	3	6	3	4	4
COL14A1	Collagen alpha-1(XIV) chain;Isoform 2 of Collagen alpha-1(XIV) chain	Q05707;Q05707-2	Q05707;Q05707-2	-			0.38555	-0.544267	-0.882277	16.5936	18.2134	17.8465	15.6461	17.0543	16.273	16.5532	16.7533	0.000618407	0.000407511	193515.47;193515.47-2	12	5	28	2	3	13	16	19
NFIX	Isoform 4 of Nuclear factor 1 X-type	Q14938-4	Q14938-4	-		+	2.15974	-0.543125	-4.02461	16.452	16.3358	16.5377	15.9848	16.4291	15.8615	15.8619	15.6909	0.000294	0.000221	54142.2	6	6	6	5	6	5	5	4
BICC1	Protein bicaudal C homolog 1	Q9H694	Q9H694	-			1.28027	-0.543051	-2.41176	16.0483	15.921	16.3412	15.6552	15.732	15.2781	15.8106	15.1008	0.00153	0.000855	104844	2	5	11	6	6	4	1	3
MIA2	Melanoma inhibitory activity protein 2;Isoform 9 of Melanoma inhibitory activity protein 2;Isoform 10 of Melanoma inhibitory activity protein 2;Isoform 13 of Melanoma inhibitory activity protein 2;Isoform 6 of Melanoma inhibitory activity protein 2;Isoform 8 of Melanoma inhibitory activity protein 2	Q96PC5;Q96PC5-10;Q96PC5-11;Q96PC5-14;Q96PC5-7;Q96PC5-9	Q96PC5;Q96PC5-10;Q96PC5-11;Q96PC5-14;Q96PC5-7;Q96PC5-9	-		+	1.47714	-0.542995	-2.74908	15.5981	15.3546	15.6812	15.5928	15.5169	14.6869	15.5012	14.829	0.00265	0.00128	159835.76;159835.76-10;159835.76-11;159835.76-14;159835.76-7;159835.76-9	7	3	8	6	4	6	5	5
MRPL11	39S ribosomal protein L11, mitochondrial	Q9Y3B7	Q9Y3B7	+	LSU;Mitochondrial central dogma;Mitochondrial ribosome;Translation	+	4.89839	-0.542246	-13.0218	16.8642	16.8617	16.7867	16.7213	16.8906	16.2895	16.2751	16.2833	1.08e-05	3.35e-05	20683.2	9	10	10	7	10	9	8	7
SEMA3C	Semaphorin-3C	Q99985	Q99985	-			0.375644	-0.542234	-0.895641	NaN	NaN	17.0866	16.7748	15.3083	16.1752	15.3412	16.0266	2.86e-05	4.45e-05	85207	NaN	NaN	2	2	1	2	2	3
CRELD1	Protein disulfide isomerase CRELD1	Q96HD1	Q96HD1	-			0.802688	-0.541963	-1.61466	16.0241	15.2318	15.5801	16.6072	15.3513	15.2291	15.2359	15.1858	2.35e-05	4.1e-05	45439.5	5	5	5	5	5	5	4	4
ARMCX3	Armadillo repeat-containing X-linked protein 3	Q9UH62	Q9UH62	+	Mitochondrial dynamics and surveillance;Trafficking	+	2.81002	-0.541397	-5.47631	17.4874	17.7108	17.4562	17.848	17.666	17.0648	17.1445	17.0676	3.63e-06	3.26e-05	42500.6	12	14	12	14	12	13	13	12
RAB3D	Ras-related protein Rab-3D	O95716	O95716	mito-interacting			1.13138	-0.54128	-2.16177	19.008	19.1515	18.2946	18.5081	19.2349	18.3349	18.1948	18.3647	0.00288876	0.00133466	24267.1	2	2	1	1	2	1	1	1
BAG4	BAG family molecular chaperone regulator 4;Isoform 2 of BAG family molecular chaperone regulator 4	O95429;O95429-2	O95429;O95429-2	-			0.642714	-0.540877	-1.37461	16.2953	16.1304	14.9087	NaN	16.1798	15.19	15.5252	15.2978	0.0076481	0.00325274	49594.07;49594.07-2	1	1	1	NaN	1	1	1	1
GOLPH3	Golgi phosphoprotein 3	Q9H4A6	Q9H4A6	+	0	+	1.85774	-0.539494	-3.43557	16.8291	16.684	16.6418	16.3846	16.6523	15.7589	16.2468	16.291	0.00016	0.000135	33810.5	7	5	5	5	6	3	5	4
MTCH1	Mitochondrial carrier homolog 1;Isoform 2 of Mitochondrial carrier homolog 1	Q9NZJ7;Q9NZJ7-2	Q9NZJ7;Q9NZJ7-2	+	SLC25A family;Small molecule transport		1.26376	-0.539299	-2.38386	17.8568	17.4671	17.4394	16.9968	17.3862	17.1744	16.9493	16.5462	9.17e-06	3.33e-05	41544.25;41544.25-2	10	10	9	10	10	9	8	7
CDC73	Parafibromin	Q6P1J9	Q6P1J9	-		+	2.35473	-0.538957	-4.43097	16.1182	16.2814	15.8375	16.1983	16.3563	15.5869	15.6823	15.5889	6.28e-05	6.89e-05	60576.6	10	5	6	9	7	9	9	10
NES	Nestin	P48681	P48681	-			0.708415	-0.538301	-1.4558	16.9745	17.181	16.6337	18.2334	17.4549	16.8566	16.8865	16.5284	5.74e-06	3.26e-05	177439	25	34	22	40	32	16	21	18
ARHGAP5	Rho GTPase-activating protein 5;Isoform 2 of Rho GTPase-activating protein 5	Q13017;Q13017-2	Q13017;Q13017-2	-		+	2.0227	-0.538032	-3.75169	15.4204	15.4554	15.4734	15.5631	15.8327	15.1319	14.7294	15.1715	0.000493	0.00034	172460.01;172460.01-2	6	10	9	9	10	9	7	9
PGP	Glycerol-3-phosphate phosphatase	A6NDG6	A6NDG6	-		+	2.34767	-0.537772	-4.41586	16.8312	16.8893	16.4474	16.5177	16.8019	16.1595	16.2165	16.1032	0.00121	0.000705	34006.1	8	8	6	7	7	5	6	6
JMJD8	JmjC domain-containing protein 8;Isoform 2 of JmjC domain-containing protein 8	Q96S16;Q96S16-2	Q96S16;Q96S16-2	-			1.1415	-0.53695	-2.17866	17.8542	17.9381	17.7597	17.0597	18.0483	17.0321	17.1475	17.4056	0.00296454	0.00134734	29509.29;29509.29-2	1	1	1	1	1	1	1	2
IFT27	Intraflagellar transport protein 27 homolog;Isoform 2 of Intraflagellar transport protein 27 homolog	Q9BW83;Q9BW83-2	Q9BW83;Q9BW83-2	-		+	2.78302	-0.536714	-5.41012	16.4944	16.6442	16.795	16.574	16.7077	16.2619	15.9278	16.1293	8.21e-05	8.34e-05	20480.46;20480.46-2	4	4	5	5	5	1	4	3
UBFD1	Ubiquitin domain-containing protein UBFD1	O14562	O14562	-		+	3.7851	-0.535847	-8.31588	17.5547	17.6955	17.8246	17.6749	17.65	17.1992	17.0697	17.1634	1.5e-05	3.47e-05	33381.9	5	6	5	5	6	4	5	5
ETFDH	Electron transfer flavoprotein-ubiquinone oxidoreductase, mitochondrial;Isoform 2 of Electron transfer flavoprotein-ubiquinone oxidoreductase, mitochondrial	Q16134;Q16134-3	Q16134;Q16134-3	+	Metabolism;Amino acid metabolism;Branched-chain amino acid metabolism;Choline and betaine metabolism;Electron carriers;Fatty acid oxidation;Fe-S-containing proteins;Glycine metabolism;Lipid metabolism;Lysine metabolism;Metabolism;Metals and cofactors;Q-linked reactions, other;Vitamin metabolism	+	2.39066	-0.535655	-4.50836	15.4524	15.7397	15.7437	15.7506	15.4032	14.9638	15.052	15.2309	0.00113	0.000665	68495.42;68495.42-3	5	7	6	8	4	3	5	3
GCC2	GRIP and coiled-coil domain-containing protein 2	Q8IWJ2	Q8IWJ2	-		+	3.79315	-0.535564	-8.34355	15.9588	15.8334	16.0296	16.0135	15.8898	15.5027	15.4165	15.3092	0.00115	0.000676	195910	6	4	6	8	9	5	5	3
FKBP15	FK506-binding protein 15	Q5T1M5	Q5T1M5	-		+	2.92239	-0.535501	-5.75811	15.7686	15.7729	15.7351	15.8275	15.6446	14.9862	15.3518	15.3046	0.000110976	0.000102698	133630	16	14	16	14	14	11	10	8
GGA1	ADP-ribosylation factor-binding protein GGA1;Isoform 3 of ADP-ribosylation factor-binding protein GGA1;Isoform 4 of ADP-ribosylation factor-binding protein GGA1;Isoform 6 of ADP-ribosylation factor-binding protein GGA1	Q9UJY5;Q9UJY5-3;Q9UJY5-4;Q9UJY5-6	Q9UJY5;Q9UJY5-3;Q9UJY5-4;Q9UJY5-6	-			0.533987	-0.535435	-1.1763	16.8605	16.8618	16.6306	15.4646	16.7724	15.8131	16.152	NaN	0.00238636	0.00120477	70384.21;70384.21-3;70384.21-4;70384.21-6	2	2	2	1	1	3	2	NaN
ATG7	Ubiquitin-like modifier-activating enzyme ATG7	O95352	O95352	-		+	3.08406	-0.535244	-6.18209	16.5815	16.6051	16.6309	16.4722	16.2794	15.9657	15.9653	16.0047	1.14e-05	3.36e-05	77959.6	10	10	10	12	9	9	8	10
ITPR3	Inositol 1,4,5-trisphosphate receptor type 3	Q14573	Q14573	-		+	1.95543	-0.535074	-3.62123	15.9924	16.4243	15.8099	15.8593	16.0209	15.4505	15.4354	15.573	5.68e-05	6.46e-05	304106	29	31	23	26	28	16	19	18
SRSF10	Serine/arginine-rich splicing factor 10;Isoform 2 of Serine/arginine-rich splicing factor 10;Isoform 3 of Serine/arginine-rich splicing factor 10;Isoform 4 of Serine/arginine-rich splicing factor 10;Isoform 5 of Serine/arginine-rich splicing factor 10;Isoform 6 of Serine/arginine-rich splicing factor 10	O75494;O75494-2;O75494-3;O75494-4;O75494-5;O75494-6	O75494;O75494-2;O75494-3;O75494-4;O75494-5;O75494-6	-		+	3.08899	-0.533778	-6.19538	16.6088	16.5986	16.3853	16.4189	16.6565	16.0311	16.0889	15.8796	4.34e-05	5.48e-05	31300.54;31300.54-2;31300.54-3;31300.54-4;31300.54-5;31300.54-6	6	6	6	6	6	6	4	5
FTSJ1	Putative tRNA (cytidine(32)/guanosine(34)-2'-O)-methyltransferase;Isoform 2 of Putative tRNA (cytidine(32)/guanosine(34)-2'-O)-methyltransferase	Q9UET6;Q9UET6-2	Q9UET6;Q9UET6-2	-			0.907134	-0.533654	-1.7889	16.3969	16.0131	16.522	16.3617	16.3762	16.2145	16.1405	15.0459	0.000609	0.000403	36079.11;36079.11-2	2	2	2	2	3	1	1	3
PLEKHF1	Pleckstrin homology domain-containing family F member 1	Q96S99	Q96S99	-			0.989688	-0.532047	-1.92605	16.7463	16.8662	17.1996	16.8852	16.4459	16.7452	15.711	16.4335	0.000615	0.000406	31194.5	3	3	4	3	3	2	3	2
CTSA	Lysosomal protective protein;Isoform 2 of Lysosomal protective protein	P10619;P10619-2	P10619;P10619-2	-		+	1.66419	-0.531768	-3.07983	18.1033	18.5546	18.5092	18.8932	18.374	18.0137	17.9346	17.917	4.66e-06	3.26e-05	54466.07;54466.07-2	10	10	9	9	8	9	9	10
MTCL1	Microtubule cross-linking factor 1	Q9Y4B5	Q9Y4B5	-		+	1.65909	-0.531326	-3.07067	15.6335	15.9458	16.0856	15.6891	15.929	15.5188	15.4904	14.9666	0.00219815	0.00114126	209526	4	14	13	9	12	2	2	3
CMPK1	UMP-CMP kinase	P30085	P30085	-		+	4.06508	-0.531086	-9.32637	18.532	18.4438	18.5431	18.6491	18.6789	18.0319	18.0311	18.0519	1.59e-05	3.54e-05	22222.3	11	12	12	12	12	12	12	11
SLC25A46	Solute carrier family 25 member 46	Q96AG3	Q96AG3	+	Fission;Intramitochondrial membrane interactions;Mitochondrial dynamics and surveillance;SLC25A family;Small molecule transport	+	1.61827	-0.530785	-2.99756	16.9691	16.4542	16.7474	16.3405	16.9042	16.0742	16.0517	16.331	0.00225448	0.00116104	46174	1	1	2	2	1	1	1	2
TOX4	TOX high mobility group box family member 4;Isoform 2 of TOX high mobility group box family member 4;Isoform 3 of TOX high mobility group box family member 4	O94842;O94842-2;O94842-3	O94842;O94842-2;O94842-3	-		+	1.64181	-0.528977	-3.03963	16.2193	16.1954	15.9002	15.7436	16.216	15.2129	15.6906	15.6744	0.00156177	0.000870338	66194.81;66194.81-2;66194.81-3	4	2	2	2	4	2	2	1
PML	Protein PML	P29590	P29590	-		+	2.50847	-0.528907	-4.76787	16.7401	16.8285	17.059	16.557	16.7273	16.2045	16.2949	16.2611	3.5e-05	4.88e-05	97550.6	21	23	24	21	23	18	23	20
DGKQ	Diacylglycerol kinase theta	P52824	P52824	-			0.422592	-0.528286	-0.951848	12.4169	13.4624	13.7042	14.1453	13.8283	12.133	12.8419	13.9746	0.00276732	0.0013153	101155	3	1	1	1	1	1	2	1
RGS10	Regulator of G-protein signaling 10;Isoform 1 of Regulator of G-protein signaling 10;Isoform 2 of Regulator of G-protein signaling 10	O43665;O43665-1;O43665-2	O43665;O43665-1;O43665-2	-		+	2.54592	-0.528099	-4.8523	16.6691	16.6518	16.3843	16.3195	16.3608	16.0045	15.8368	16.0058	0.000496942	0.000342618	21209.92;21209.92-1;21209.92-2	5	5	3	3	4	3	3	3
TSC1	Hamartin	Q92574	Q92574	-			1.11777	-0.528016	-2.13906	15.6558	15.0469	15.0872	15.0086	15.3106	15.2049	14.4782	14.3983	0.00138	0.000789	129767	4	5	3	5	2	3	4	5
HPS6	Hermansky-Pudlak syndrome 6 protein	Q86YV9	Q86YV9	-		+	2.4565	-0.527569	-5.1902	14.5627	14.3775	14.7037	14.6511	NaN	14.1029	13.9124	14.1233	0.0017	0.000936	82974.8	4	3	4	4	NaN	3	3	1
GLIPR2	Golgi-associated plant pathogenesis-related protein 1	Q9H4G4	Q9H4G4	-		+	1.63141	-0.527321	-3.02102	18.6519	18.2588	18.961	18.3371	18.389	18.0752	17.9215	17.9801	2.32e-06	3.26e-05	17218.3	5	5	5	5	5	4	4	5
RAPGEF2	Rap guanine nucleotide exchange factor 2	Q9Y4G8	Q9Y4G8	-		+	1.62569	-0.525887	-3.01079	16.2838	16.5783	16.5128	16.5086	16.2049	16.149	16.0256	15.5008	0.00269554	0.00129625	167417	2	1	3	3	1	1	1	1
IRGQ	Immunity-related GTPase family Q protein	Q8WZA9	Q8WZA9	-		+	3.78006	-0.525283	-8.29861	16.4352	16.1799	16.3876	16.3638	16.3964	15.8366	15.7725	15.8728	0.000349	0.000256	62717.3	11	11	12	8	9	5	7	8
CPT2	Carnitine O-palmitoyltransferase 2, mitochondrial	P23786	P23786	+	Carnitine shuttle;Carnitine synthesis and transport;Fatty acid oxidation;Lipid metabolism;Metabolism;Metals and cofactors		1.28292	-0.525265	-2.41624	17.07	17.322	16.9139	17.0174	16.4468	16.3288	16.7078	16.2496	0.000506173	0.000348059	73777	4	5	7	9	5	4	7	4
TMCO3	Transmembrane and coiled-coil domain-containing protein 3;Isoform 2 of Transmembrane and coiled-coil domain-containing protein 3;Isoform 3 of Transmembrane and coiled-coil domain-containing protein 3	Q6UWJ1;Q6UWJ1-2;Q6UWJ1-3	Q6UWJ1;Q6UWJ1-2;Q6UWJ1-3	-		+	1.84042	-0.525198	-3.40313	15.5576	15.7101	15.636	15.8283	15.4888	14.8708	15.4729	15.0132	0.0014	0.000797	75597.82;75597.82-2;75597.82-3	2	3	2	3	3	3	2	1
ANKHD1	Ankyrin repeat and KH domain-containing protein 1;Isoform 4 of Ankyrin repeat and KH domain-containing protein 1;Isoform 6 of Ankyrin repeat and KH domain-containing protein 1	Q8IWZ3;Q8IWZ3-4;Q8IWZ3-6	Q8IWZ3;Q8IWZ3-4;Q8IWZ3-6			+	2.35147	-0.524896	-4.42401	16.2773	16.0023	16.1428	15.8251	15.8496	15.4289	15.4867	15.568	0.00281114	0.00132382	269457.51;269457.51-4;269457.51-6	3	3	2	1	2	1	3	1
PPCS	Phosphopantothenate--cysteine ligase	Q9HAB8	Q9HAB8	-			1.15184	-0.524385	-2.19594	16.4998	16.3074	17.0167	16.9319	16.724	15.8251	16.5821	16.1076	0.000101	9.63e-05	34005.1	7	7	11	11	9	4	3	6
DDX3Y	ATP-dependent RNA helicase DDX3Y	O15523	O15523	-			0.914069	-0.524247	-2.13977	17.0744	NaN	NaN	16.4293	NaN	16.2924	16.1657	16.2248	0.000743	0.000472	73153.6	4	NaN	NaN	4	NaN	3	4	4
STX4	Syntaxin-4	Q12846	Q12846	-		+	2.01897	-0.524242	-3.74441	17.0359	17.1628	17.1679	17.0204	17.0418	16.9207	16.4353	16.3286	0.000412	0.000294	34179.9	5	6	6	4	5	1	3	3
TMPPE	Transmembrane protein with metallophosphoesterase domain	Q6ZT21	Q6ZT21	-		+	2.15892	-0.52422	-4.41325	16.1141	15.8122	16.0165	15.9566	16.0515	NaN	15.6212	15.3107	0.00241146	0.00121345	49452.5	1	2	1	1	1	NaN	1	1
PRDX6	Peroxiredoxin-6	P30041	P30041	+	Detoxification;Lipid metabolism;Metabolism;Phospholipid metabolism;ROS and glutathione metabolism		0.499481	-0.523858	-1.0923	19.6058	20.8689	20.6123	21.7465	20.1398	20.0747	20.0824	20.0553	3.13e-06	3.26e-05	25035	20	22	22	23	22	21	22	22
GPSM1	G-protein-signaling modulator 1;Isoform 4 of G-protein-signaling modulator 1	Q86YR5;Q86YR5-4	Q86YR5;Q86YR5-4	-		+	3.67128	-0.523764	-7.93307	16.1342	16.1941	16.2753	16.1601	16.363	15.7275	15.7694	15.6078	0.00180241	0.000982216	74510.25;74510.25-4	7	6	6	7	9	4	4	5
C8orf33	UPF0488 protein C8orf33;Isoform 2 of UPF0488 protein C8orf33	Q9H7E9;Q9H7E9-2	Q9H7E9;Q9H7E9-2	-		+	1.99232	-0.522837	-3.69251	16.1254	15.8339	15.9007	15.5545	16.0505	15.4934	15.3624	15.2547	0.000120628	0.00010869	24992.5;24992.5-2	2	1	1	1	1	1	1	1
ZSWIM8	Zinc finger SWIM domain-containing protein 8;Isoform 2 of Zinc finger SWIM domain-containing protein 8;Isoform 3 of Zinc finger SWIM domain-containing protein 8;Isoform 4 of Zinc finger SWIM domain-containing protein 8;Isoform 5 of Zinc finger SWIM domain-containing protein 8	A7E2V4;A7E2V4-2;A7E2V4-3;A7E2V4-4;A7E2V4-5	A7E2V4;A7E2V4-2;A7E2V4-3;A7E2V4-4;A7E2V4-5	-			1.15634	-0.520378	-2.20346	15.8068	15.7218	16.4474	16.4722	15.8919	15.8008	15.4704	15.3717	0.00262252	0.00127662	197297.33;197297.33-2;197297.33-3;197297.33-4;197297.33-5	1	2	2	1	1	1	2	1
TMSB4X	Thymosin beta-4	P62328	P62328	-		+	1.53978	-0.52008	-2.85859	15.9025	16.2249	15.9191	15.5879	15.4756	15.3774	15.1908	15.3377	0.000100914	9.6e-05	5052.65	5	4	5	4	5	4	4	4
RBMXL1	RNA binding motif protein, X-linked-like-1	Q96E39	Q96E39	-		+	2.47792	-0.519883	-4.69971	15.2758	15.525	15.3292	15.3006	15.5466	14.6678	14.9268	15.0321	0.0087545	0.00369441	42141.6	2	2	2	2	1	1	1	1
TALDO1	Transaldolase	P37837	P37837	-		+	2.40189	-0.519337	-4.53271	19.2384	18.7662	18.8846	18.8292	18.8318	18.3362	18.4442	18.3917	3.42e-05	4.84e-05	37540.1	13	12	12	12	12	12	12	12
ACOX2	Peroxisomal acyl-coenzyme A oxidase 2	Q99424	Q99424	-			1.11859	-0.519305	-2.37861	16.2615	16.5399	16.2284	15.8475	NaN	15.7753	NaN	15.6248	0.00240177	0.00121019	76826.9	2	2	2	2	NaN	1	NaN	2
MBOAT7	Lysophospholipid acyltransferase 7	Q96N66	Q96N66	-			1.23955	-0.519162	-2.34304	18.1794	17.8721	17.2933	18.1407	18.1186	17.4356	17.3941	17.3752	2.31e-05	4.08e-05	52764.9	8	7	7	8	8	8	8	7
KIF3B	Kinesin-like protein KIF3B	O15066	O15066	-			0.521511	-0.518953	-1.13172	15.9738	14.9019	15.83	15.7673	15.8976	16.0461	14.2593	15.1601	0.00282528	0.00132638	85125.1	2	5	3	3	2	1	2	2
TMPO	Lamina-associated polypeptide 2, isoform alpha	P42166	P42166	-		+	2.21781	-0.516668	-4.14333	16.8787	16.5652	16.3101	16.5068	16.6512	16.0333	16.1006	16.0633	0.000126	0.000112	75492.1	12	10	8	9	12	11	9	9
TMEM11	Transmembrane protein 11, mitochondrial	P17152	P17152	+	Mitochondrial dynamics and surveillance	+	2.29902	-0.51666	-4.31259	16.7964	16.9214	17.0234	16.6857	17.1256	16.2949	16.5531	16.3335	0.000473	0.00033	21540.8	3	3	3	3	3	2	3	2
NADK	NAD kinase	O95544	O95544	-			1.15864	-0.516505	-2.77291	16.4937	16.0389	NaN	16.4443	NaN	15.7954	NaN	15.8229	0.0135	0.0056	49228.2	1	2	NaN	1	NaN	2	NaN	2
ADCY9	Adenylate cyclase type 9	O60503	O60503	-			0.669017	-0.515329	-1.3887	15.5527	16.0494	16.0395	15.8165	15.9368	15.9609	15.7152	14.4148	0.000233	0.000182	150701	4	4	4	3	4	3	1	3
GPHN	Gephyrin;Isoform 2 of Gephyrin	Q9NQX3;Q9NQX3-2	Q9NQX3;Q9NQX3-2	-		+	2.15843	-0.515328	-4.02196	16.2884	16.5269	16.5295	16.2503	16.2621	16.1165	15.7375	15.7143	0.0214	0.00859	79748.39;79748.39-2	2	4	5	1	2	2	3	2
CAV1	Caveolin-1	Q03135	Q03135	-			1.27668	-0.515238	-2.40569	19.5926	20.5863	19.9636	20.109	20.1294	19.559	19.5101	19.6138	4.91e-06	3.26e-05	20471.6	9	9	8	9	9	10	9	10
ACSF3	Malonate--CoA ligase ACSF3, mitochondrial	Q4G176	Q4G176	+	Lipid metabolism;Metabolism;Type II fatty acid synthesis	+	1.52847	-0.514335	-2.83873	15.1194	15.0309	15.697	15.0596	15.2115	14.4941	14.7992	14.8347	0.000881954	0.000541814	64130.1	4	5	2	3	4	3	3	4
PAK4	Serine/threonine-protein kinase PAK 4;Isoform 2 of Serine/threonine-protein kinase PAK 4;Isoform 4 of Serine/threonine-protein kinase PAK 4	O96013;O96013-2;O96013-4	O96013;O96013-2;O96013-4	-		+	3.04111	-0.514065	-6.06724	16.4094	16.4592	16.2199	16.1462	16.4055	15.8727	15.8071	15.7622	0.00169	0.00093	64072.05;64072.05-2;64072.05-4	7	4	3	3	5	3	5	3
TPM4	Tropomyosin alpha-4 chain	P67936	P67936	-		+	3.64661	-0.513127	-7.85213	18.836	18.8438	19.0083	18.8627	19.0554	18.4346	18.4434	18.3463	7.92e-06	3.32e-05	28521.8	25	26	24	21	25	20	20	19
EDC4	Enhancer of mRNA-decapping protein 4	Q6P2E9	Q6P2E9	-		+	3.92738	-0.5124	-8.81671	17.1189	16.9678	16.9457	17.0375	16.9221	16.5656	16.4843	16.4081	0.000111	0.000103	151661	26	26	23	22	26	14	20	17
MTARC2	Mitochondrial amidoxime reducing component 2;Isoform 2 of Mitochondrial amidoxime reducing component 2	Q969Z3;Q969Z3-2	Q969Z3;Q969Z3-2	+	Amidoxime reducing complex;Detoxification;Metabolism;Metals and cofactors;Molybdenum cofactor synthesis and proteins;Xenobiotic metabolism		0.203082	-0.512091	-0.51268	17.3962	16.0013	14.7362	16.7855	13.8048	16.0588	15.6982	13.941	0.00309	0.00138	38023.37;38023.37-2	1	3	3	1	1	3	2	3
CNN3	Calponin-3	Q15417	Q15417	-			0.762436	-0.511914	-1.54708	18.6746	18.3505	18.7972	17.3899	18.4172	17.7705	17.8298	17.8416	5.32e-06	3.26e-05	36413.7	14	13	14	12	13	14	14	13
ABI1	Abl interactor 1;Isoform 10 of Abl interactor 1;Isoform 2 of Abl interactor 1;Isoform 3 of Abl interactor 1;Isoform 4 of Abl interactor 1;Isoform 5 of Abl interactor 1;Isoform 6 of Abl interactor 1;Isoform 7 of Abl interactor 1;Isoform 8 of Abl interactor 1;Isoform 9 of Abl interactor 1	Q8IZP0;Q8IZP0-10;Q8IZP0-2;Q8IZP0-3;Q8IZP0-4;Q8IZP0-5;Q8IZP0-6;Q8IZP0-7;Q8IZP0-8;Q8IZP0-9	Q8IZP0;Q8IZP0-10;Q8IZP0-2;Q8IZP0-3;Q8IZP0-4;Q8IZP0-5;Q8IZP0-6;Q8IZP0-7;Q8IZP0-8;Q8IZP0-9	-		+	1.89405	-0.511406	-3.50407	16.7789	16.7006	16.6359	16.2804	16.5491	16.0887	16.2864	15.8577	9.17e-05	8.98e-05	55080.84;55080.84-10;55080.84-2;55080.84-3;55080.84-4;55080.84-5;55080.84-6;55080.84-7;55080.84-8;55080.84-9	12	13	12	11	11	4	8	4
MDC1	Mediator of DNA damage checkpoint protein 1;Isoform 2 of Mediator of DNA damage checkpoint protein 1;Isoform 3 of Mediator of DNA damage checkpoint protein 1	Q14676;Q14676-2;Q14676-3	Q14676;Q14676-2;Q14676-3	-			0.645255	-0.511401	-1.34797	14.5355	14.4854	13.3525	14.2367	14.8328	13.3108	14.1056	13.9151	0.0028396	0.00132671	226666.18;226666.18-2;226666.18-3	3	3	1	3	4	1	1	1
IGF2BP2	Insulin-like growth factor 2 mRNA-binding protein 2;Isoform 2 of Insulin-like growth factor 2 mRNA-binding protein 2	Q9Y6M1;Q9Y6M1-1	Q9Y6M1;Q9Y6M1-1	-		+	3.9769	-0.511336	-8.99709	17.7614	17.6253	17.7455	17.5614	17.587	17.1075	17.1787	17.1482	2.09e-05	3.86e-05	66121.42;66121.42-1	16	15	15	15	15	14	16	15
FN3KRP	Ketosamine-3-kinase	Q9HA64	Q9HA64	-		+	1.3971	-0.510462	-2.61079	15.9454	16.2159	16.076	15.5316	15.7443	15.5646	15.5212	15.0906	0.0019377	0.00104035	34412.2	6	6	6	5	6	4	4	4
MYO1B	Unconventional myosin-Ib	O43795	O43795	-		+	1.66572	-0.509877	-3.08259	17.8747	18.3671	18.5261	18.2779	17.9577	17.7354	17.6684	17.6687	3.14e-05	4.67e-05	131985	37	39	41	39	41	37	39	40
NDUFV2	NADH dehydrogenase [ubiquinone] flavoprotein 2, mitochondrial	P19404	P19404	+	CI subunits;Complex I;Fe-S-containing proteins;Metabolism;Metals and cofactors;OXPHOS;OXPHOS subunits	+	3.681	-0.509429	-7.96518	18.2658	18.2161	18.4021	18.2049	18.2444	17.8748	17.705	17.692	4.73e-05	5.74e-05	27391.5	6	6	6	6	5	5	6	6
DHTKD1	Probable 2-oxoglutarate dehydrogenase E1 component DHKTD1, mitochondrial	Q96HY7	Q96HY7	+	Amino acid metabolism;Lysine metabolism;Metabolism	+	1.4125	-0.509025	-2.63727	16.0248	15.9656	16.0781	15.8367	16.0524	15.517	15.9013	15.0291	0.00272	0.0013	103077	2	2	1	2	1	2	1	1
NFIC	Nuclear factor 1 C-type;Isoform 5 of Nuclear factor 1 C-type;Isoform 6 of Nuclear factor 1 C-type	P08651;P08651-5;P08651-6	P08651;P08651-5;P08651-6	-		+	2.35574	-0.508587	-4.43315	15.5428	15.6499	15.5381	15.3727	15.6568	15.2924	14.8865	14.9515	0.00282	0.00133	55674.97;55674.97-5;55674.97-6	5	5	4	3	5	2	3	3
NDUFS7	NADH dehydrogenase [ubiquinone] iron-sulfur protein 7, mitochondrial;Isoform 2 of NADH dehydrogenase [ubiquinone] iron-sulfur protein 7, mitochondrial	O75251;O75251-2	O75251;O75251-2	+	CI subunits;Complex I;Fe-S-containing proteins;Metabolism;Metals and cofactors;OXPHOS;OXPHOS subunits	+	4.20289	-0.508569	-9.86244	18.0607	18.1815	18.1327	18.2746	18.1632	17.5949	17.6993	17.6677	4.39e-05	5.51e-05	23563.5;23563.5-2	3	3	3	3	3	2	3	3
STX2	Syntaxin-2;Isoform 1 of Syntaxin-2;Isoform 2 of Syntaxin-2	P32856;P32856-2;P32856-3	P32856;P32856-2;P32856-3	-		+	2.64531	-0.508335	-5.08112	16.0419	16.386	16.3533	16.2163	16.0689	15.752	15.7508	15.612	6.54e-05	7.05e-05	33341.04;33341.04-2;33341.04-3	4	4	4	3	4	2	3	3
YWHAB	Isoform Short of 14-3-3 protein beta/alpha	P31946-2	P31946-2	-		+	3.86429	-0.508211	-8.59149	20.003	19.8769	19.9165	19.7398	19.8354	19.3611	19.3949	19.3424	5.86e-06	3.26e-05	27850.1	12	13	12	11	12	11	11	11
PPP2R3A	Serine/threonine-protein phosphatase 2A regulatory subunit B'' subunit alpha	Q06190	Q06190	-		+	1.31566	-0.507502	-2.80945	15.4388	15.6845	NaN	15.4321	15.6891	14.8182	15.289	NaN	0.00788369	0.00334746	130278	2	4	NaN	3	2	2	3	NaN
DCTN5	Dynactin subunit 5;Isoform 2 of Dynactin subunit 5	Q9BTE1;Q9BTE1-2	Q9BTE1;Q9BTE1-2	-			0.857355	-0.50731	-1.70601	17.2072	17.3556	17.4356	18.2756	17.1293	17.2283	17.0033	16.6885	0.00325	0.00144	20126.51;20126.51-2	1	1	1	1	1	2	1	2
HNRNPM	Heterogeneous nuclear ribonucleoprotein M;Isoform 2 of Heterogeneous nuclear ribonucleoprotein M	P52272;P52272-2	P52272;P52272-2	-		+	1.87254	-0.506668	-3.46343	18.6905	18.651	18.5497	18.1197	18.7083	18.05	18.0145	18.0471	4.7e-06	3.26e-05	77515.52;77515.52-2	30	29	29	30	31	30	29	29
RPS5	40S ribosomal protein S5	P46782	P46782	-		+	5.01771	-0.50643	-13.6504	18.4306	18.5042	18.5534	18.5093	18.4492	17.9919	17.9255	18.0313	9.09e-06	3.33e-05	22876.4	5	5	5	5	5	6	5	6
FECH	Ferrochelatase, mitochondrial;Isoform 2 of Ferrochelatase, mitochondrial	P22830;P22830-2	P22830;P22830-2	+	Fe-S-containing proteins;Heme synthesis and processing;Metabolism;Metals and cofactors		1.203	-0.506227	-2.2816	15.874	16.3131	16.7591	16.6479	16.1094	15.9228	15.7726	15.808	6.38e-05	6.95e-05	47862.18;47862.18-2	3	7	7	6	6	3	4	4
CNNM3	Metal transporter CNNM3;Isoform 2 of Metal transporter CNNM3;Isoform 3 of Metal transporter CNNM3	Q8NE01;Q8NE01-2;Q8NE01-3	Q8NE01;Q8NE01-2;Q8NE01-3	-			1.20176	-0.505523	-2.27953	14.2599	14.7477	14.7927	14.5947	14.1861	13.7293	14.4	13.9028	0.00266	0.00129	76119.2;76119.2-2;76119.2-3	1	3	2	2	3	1	2	2
ASPSCR1	Tether containing UBX domain for GLUT4;Isoform 2 of Tether containing UBX domain for GLUT4	Q9BZE9;Q9BZE9-2	Q9BZE9;Q9BZE9-2	-		+	1.86398	-0.505495	-3.44731	16.4073	16.4262	16.4311	16.0986	16.3393	15.5072	15.9661	16.0318	0.000774	0.000488	60183.07;60183.07-2	8	8	10	8	8	1	1	2
BTF3	Transcription factor BTF3	P20290	P20290	-		+	2.91807	-0.505039	-5.74708	18.2548	18.077	17.9652	17.9216	18.2083	17.6099	17.5804	17.5507	4.04e-05	5.23e-05	22168	6	6	5	6	6	6	5	5
USP14	Ubiquitin carboxyl-terminal hydrolase 14;Isoform 2 of Ubiquitin carboxyl-terminal hydrolase 14	P54578;P54578-2	P54578;P54578-2	-		+	4.96982	-0.504927	-13.3947	17.7777	17.878	17.7803	17.7812	17.8897	17.2808	17.3565	17.3121	5.47e-06	3.26e-05	56069.07;56069.07-2	18	19	18	19	18	16	17	19
AP4E1	AP-4 complex subunit epsilon-1	Q9UPM8	Q9UPM8	-			0.747328	-0.504605	-1.52162	15.4701	14.5887	15.9062	15.975	15.4616	14.8733	15.0238	15.0301	0.000922	0.000563	127287	3	2	3	2	3	2	2	3
AMFR	E3 ubiquitin-protein ligase AMFR	Q9UKV5	Q9UKV5	-		+	1.88959	-0.503631	-3.49562	16.4089	16.4573	16.168	16.119	16.4369	16.0597	15.8319	15.5515	3.9e-05	5.13e-05	72995.8	5	4	2	4	4	3	3	2
CD9	CD9 antigen	P21926	P21926	-			0.313419	-0.502826	-0.742301	19.2007	16.2185	16.816	17.4506	17.7617	17.2191	16.8063	16.9347	0.000106	9.94e-05	25416	4	2	3	4	4	4	4	4
PSME3	Proteasome activator complex subunit 3;Isoform 2 of Proteasome activator complex subunit 3	P61289;P61289-2	P61289;P61289-2	-		+	2.82502	-0.502417	-5.51334	17.3285	17.2858	17.0146	17.1326	17.286	16.5937	16.7169	16.8107	1.5e-05	3.47e-05	29506.05;29506.05-2	11	13	9	12	11	6	6	5
SF3B4	Splicing factor 3B subunit 4	Q15427	Q15427	-		+	3.47678	-0.501987	-7.3134	17.3435	17.1511	17.1154	17.2736	17.3224	16.7749	16.6542	16.7886	0.000707	0.000454	44385.7	5	5	5	5	5	5	5	5
VAMP5	Vesicle-associated membrane protein 5	O95183	O95183	-		+	1.31649	-0.501908	-2.47314	17.5107	18.1173	17.338	17.2973	17.7381	17.052	17.1722	17.0709	0.000111676	0.000103025	12804.8	2	2	2	2	2	2	2	2
TMBIM6	Bax inhibitor 1;Isoform 2 of Bax inhibitor 1	P55061;P55061-2	P55061;P55061-2	mito-interacting		+	2.63541	-0.5016	-5.05803	16.5108	16.4381	16.6028	16.8047	16.693	16.1359	16.2069	15.982	0.000115	0.000105	26537.69;26537.69-2	3	2	3	3	3	2	3	3
DCAF16	DDB1- and CUL4-associated factor 16	Q9NXF7	Q9NXF7	-			0.76729	-0.500477	-1.59822	13.709	14.7179	14.4754	13.9955	14.0219	13.8302	NaN	13.5368	0.0196	0.00795	24193.4	1	1	1	1	1	1	NaN	1
RIN3	Ras and Rab interactor 3;Isoform 4 of Ras and Rab interactor 3	Q8TB24;Q8TB24-4	Q8TB24;Q8TB24-4	-			0.427166	-0.500254	-1.04208	15.4687	16.5377	NaN	NaN	NaN	15.5988	15.8047	15.1053	0.00336	0.00147	107853.55;107853.55-4	2	1	NaN	NaN	NaN	1	1	1
DIABLO	Diablo homolog, mitochondrial;Isoform 2 of Diablo homolog, mitochondrial;Isoform 3 of Diablo homolog, mitochondrial	Q9NR28;Q9NR28-2;Q9NR28-3	Q9NR28;Q9NR28-2;Q9NR28-3	+	Apoptosis;Mitochondrial dynamics and surveillance	+	1.30667	-0.500044	-2.45649	14.9943	15.0886	15.2458	15.194	14.711	14.1103	14.7963	14.7335	0.00152083	0.000852799	27130.81;27130.81-2;27130.81-3	4	5	4	5	2	3	2	1
ZC3H15	Zinc finger CCCH domain-containing protein 15	Q8WU90	Q8WU90	-		+	5.21275	-0.498957	-14.74	16.6657	16.6293	16.5731	16.5633	16.6229	16.08	16.0821	16.1736	3.19e-05	4.71e-05	48602.5	5	8	8	4	7	5	5	6
GAA	Lysosomal alpha-glucosidase	P10253	P10253	-		+	1.33536	-0.498767	-2.50523	17.0395	17.5549	17.544	17.9597	17.6814	17.0499	17.0517	17.0698	3.12e-05	4.66e-05	105324	13	14	13	15	15	13	12	13
CDC40	Pre-mRNA-processing factor 17	O60508	O60508	-			0.418981	-0.497688	-0.945125	16.6195	17.0065	17.0285	16.0842	16.7602	16.9109	14.9057	16.7897	0.00897	0.00378	65521.2	2	1	1	1	2	1	2	2
NFKB2	Nuclear factor NF-kappa-B p100 subunit	Q00653	Q00653	-		+	2.2985	-0.497596	-4.3115	15.5424	15.5914	15.6137	15.18	15.4711	14.8603	15.0022	15.0839	0.001212	0.000705495	96749.2	10	13	10	8	12	7	8	6
NEU1	Sialidase-1	Q99519	Q99519	-		+	2.64646	-0.497572	-5.08381	16.4762	16.8387	16.568	16.8329	16.6251	16.1321	16.1727	16.207	0.00145598	0.000821558	45467.3	7	8	5	9	9	7	8	7
DDX18	ATP-dependent RNA helicase DDX18	Q9NVP1	Q9NVP1	-		+	3.1544	-0.49744	-6.3738	16.15	16.0628	16.0579	16.2561	16.2837	15.7285	15.5381	15.7274	0.000186	0.000152	75406.8	12	10	10	12	13	10	10	8
KHDRBS1	KH domain-containing, RNA-binding, signal transduction-associated protein 1;Isoform 2 of KH domain-containing, RNA-binding, signal transduction-associated protein 1	Q07666;Q07666-2	Q07666;Q07666-2	-		+	2.71095	-0.496914	-5.23616	18.4501	18.3644	18.2534	18.0499	18.3737	17.7793	17.769	17.8559	7.02e-05	7.39e-05	48227.33;48227.33-2	7	9	8	7	8	6	5	6
ZMIZ1	Zinc finger MIZ domain-containing protein 1;Isoform 2 of Zinc finger MIZ domain-containing protein 1	Q9ULJ6;Q9ULJ6-2	Q9ULJ6;Q9ULJ6-2	-			1.00735	-0.496834	-1.95538	16.9618	16.7289	16.5851	16.4979	16.7647	16.758	15.6635	16.211	0.00305885	0.00137174	115482.73;115482.73-2	2	3	1	1	1	1	2	2
BGN	Biglycan	P21810	P21810	-			0.540159	-0.495763	-1.16484	16.3129	16.3213	17.7831	15.9573	16.4448	15.9085	16.2151	16.0807	0.000611	0.000404	41654.1	4	4	8	3	5	5	4	6
WDFY3	WD repeat and FYVE domain-containing protein 3;Isoform 2 of WD repeat and FYVE domain-containing protein 3	Q8IZQ1;Q8IZQ1-2	Q8IZQ1;Q8IZQ1-2	-		+	1.36087	-0.495577	-2.68489	NaN	14.7135	14.8822	15.1183	14.8638	14.606	14.5634	14.0272	0.00301855	0.00135939	395258.37;395258.37-2	NaN	3	4	3	3	2	2	5
SASH1	SAM and SH3 domain-containing protein 1	O94885	O94885	-		+	2.34908	-0.494818	-4.41888	16.6351	16.3796	16.3929	16.2062	16.5517	15.9749	16.0388	15.8012	7.67e-05	7.91e-05	136653	19	15	10	9	15	5	6	4
LRRFIP1	Isoform 2 of Leucine-rich repeat flightless-interacting protein 1	Q32MZ4-2	Q32MZ4-2	-		+	2.0447	-0.494672	-3.79486	16.5246	16.2836	16.1104	16.0542	16.4952	15.7951	15.8564	15.7452	5.42e-05	6.25e-05	86403.8	25	23	22	18	26	9	9	9
DPP7	Dipeptidyl peptidase 2	Q9UHL4	Q9UHL4	-			1.04194	-0.494587	-2.01286	16.377	16.9048	16.4191	17.265	16.3231	16.195	16.1397	16.1549	0.000314	0.000235	54341.5	8	10	9	10	7	7	8	7
PAK2	Serine/threonine-protein kinase PAK 2	Q13177	Q13177	-		+	2.77395	-0.494093	-5.38801	17.542	17.4456	17.2978	17.1722	17.477	16.8798	16.9477	16.8509	1.18e-05	3.36e-05	58042.6	20	20	20	20	20	13	15	17
DUT	Deoxyuridine 5'-triphosphate nucleotidohydrolase, mitochondrial	P33316	P33316	+	Metabolism;Nucleotide metabolism;Nucleotide synthesis and processing	+	1.36336	-0.491889	-2.553	18.5901	18.1221	17.8871	18.1433	18.625	17.7267	17.8173	17.8009	8.86e-05	8.77e-05	26563.2	7	6	6	6	6	6	5	6
SH3KBP1	SH3 domain-containing kinase-binding protein 1	Q96B97	Q96B97	-		+	2.52265	-0.491744	-4.79973	16.7893	16.475	16.4062	16.571	16.4712	16.1496	15.9191	16.0837	2.32e-05	4.09e-05	73126.3	20	16	16	15	16	10	13	11
COX6C	Cytochrome c oxidase subunit 6C	P09669	P09669	+	CIV subunits;Complex IV;OXPHOS;OXPHOS subunits	+	2.51685	-0.49083	-4.78668	16.7575	16.9342	16.9856	16.8328	16.9595	16.5737	16.1801	16.4555	1.1e-05	3.36e-05	8781.43	7	8	8	7	8	7	7	7
FARP1	FERM, ARHGEF and pleckstrin domain-containing protein 1;Isoform 2 of FERM, ARHGEF and pleckstrin domain-containing protein 1	Q9Y4F1;Q9Y4F1-2	Q9Y4F1;Q9Y4F1-2	-		+	2.57246	-0.490633	-4.91272	17.1488	17.5583	17.4057	17.4658	17.2596	16.8332	16.8647	16.9332	2.9e-05	4.48e-05	118632.93;118632.93-2	26	26	26	25	26	26	25	25
DDX52	Probable ATP-dependent RNA helicase DDX52	Q9Y2R4	Q9Y2R4	-		+	1.47003	-0.490603	-2.73674	16.4538	16.0633	15.715	16.0966	16.2144	15.5484	15.8355	15.4701	0.000257	0.000197	67498.1	3	3	3	3	4	4	4	3
PIK3R2	Phosphatidylinositol 3-kinase regulatory subunit beta	O00459	O00459	-		+	1.60475	-0.490547	-3.1689	15.9822	15.7642	16.2461	16.0021	16.0671	NaN	15.6814	15.3622	0.00286	0.00133	81545.3	1	2	3	3	3	NaN	4	3
RPLP1	60S acidic ribosomal protein P1	P05386	P05386	-			0.659162	-0.490245	-1.37183	18.5236	18.4197	19.6592	18.0835	18.4864	18.1205	18.1873	18.1249	0.000962	0.000583	11513.9	2	2	2	2	2	2	2	2
NDUFA13	NADH dehydrogenase [ubiquinone] 1 alpha subcomplex subunit 13;Isoform 2 of NADH dehydrogenase [ubiquinone] 1 alpha subcomplex subunit 13	Q9P0J0;Q9P0J0-2	Q9P0J0;Q9P0J0-2	+	CI subunits;Complex I;OXPHOS;OXPHOS subunits	+	3.50242	-0.489675	-7.3927	17.8558	17.9964	17.9882	17.916	17.8007	17.3286	17.531	17.4056	4.57e-05	5.61e-05	16698.31;16698.31-2	5	5	5	5	5	5	5	5
PISD	Phosphatidylserine decarboxylase proenzyme, mitochondrial;Isoform 2 of Phosphatidylserine decarboxylase proenzyme, mitochondrial	Q9UG56;Q9UG56-2	Q9UG56;Q9UG56-2	+	Lipid metabolism;Metabolism;Phospholipid metabolism		0.474334	-0.488776	-1.09384	NaN	16.548	17.9834	17.2811	17.1496	NaN	16.8602	16.6433	0.0112237	0.00467572	46671.69;46671.69-2	NaN	2	1	1	1	NaN	1	2
FAIM	Fas apoptotic inhibitory molecule 1	Q9NVQ4	Q9NVQ4	-			1.09542	-0.488372	-2.10182	15.578	16.2133	15.7203	16.3602	16.3011	15.3182	15.5792	15.7413	0.00272	0.0013	20214.9	1	2	1	2	2	1	1	1
NEXN	Nexilin;Isoform 4 of Nexilin	Q0ZGT2;Q0ZGT2-4	Q0ZGT2;Q0ZGT2-4	-			1.13193	-0.487539	-2.1627	17.1817	16.2559	16.9778	17.1381	16.9196	16.3164	16.485	16.4198	4.84e-05	5.83e-05	80658.27;80658.27-4	17	16	18	17	16	16	15	16
NISCH	Nischarin	Q9Y2I1	Q9Y2I1	-		+	2.07389	-0.486644	-3.8525	14.9998	15.0358	14.9227	15.1121	14.6028	14.3783	14.5723	14.3934	8.85e-05	8.77e-05	166629	6	5	4	3	3	3	4	2
ETHE1	Persulfide dioxygenase ETHE1, mitochondrial	O95571	O95571	+	Metabolism;Sulfur metabolism	+	1.50356	-0.48656	-2.79513	17.7739	17.6862	17.4098	18.1939	17.6172	17.2808	17.2856	17.1826	2.33e-05	4.09e-05	27872.9	8	9	7	10	7	8	7	8
ARHGEF6	Rho guanine nucleotide exchange factor 6;Isoform 2 of Rho guanine nucleotide exchange factor 6	Q15052;Q15052-2	Q15052;Q15052-2	-			0.543455	-0.486459	-1.17067	18.058	16.7097	16.8537	17.5082	16.7572	16.6976	17.2155	16.1597	0.00268473	0.00129238	87498.84;87498.84-2	2	4	4	2	3	2	5	2
PXDC1	PX domain-containing protein 1	Q5TGL8	Q5TGL8	-		+	1.7111	-0.486332	-3.16468	15.6643	15.6341	16.095	15.6859	16.0166	15.2811	15.5467	15.1708	0.00066	0.000432	26559.9	1	1	3	3	3	2	3	3
GORASP1	Golgi reassembly-stacking protein 1	Q9BQQ3	Q9BQQ3	-		+	2.18863	-0.486126	-4.08343	15.8595	15.9831	16.2241	16.3137	15.9484	15.6113	15.6278	15.4997	0.00133285	0.000764613	46482.4	2	2	3	3	2	2	2	2
PSMF1	Proteasome inhibitor PI31 subunit	Q92530	Q92530	-		+	2.1228	-0.485418	-3.95008	17.659	17.7419	17.5319	17.354	17.293	16.9614	17.1518	16.9784	8.71e-05	8.68e-05	29816.7	4	5	5	3	3	2	3	2
SEC22B	Vesicle-trafficking protein SEC22b	O75396	O75396	-		+	2.09995	-0.484313	-3.90432	19.3	19.5216	19.6002	19.1864	19.4312	18.9975	18.7227	19.0505	1.7e-05	3.57e-05	24593.3	7	7	7	7	7	8	7	8
STK4	Serine/threonine-protein kinase 4	Q13043	Q13043	-		+	2.34854	-0.484181	-4.41773	16.1909	16.0095	15.8685	16.2855	15.9236	15.6348	15.4986	15.5808	0.00249	0.00124	55630.2	7	5	3	4	3	3	5	4
ALDH1A3	Aldehyde dehydrogenase family 1 member A3	P47895	P47895	-			0.163304	-0.483317	-0.42365	18.319	16.3568	17.593	13.7885	14.6688	15.5287	15.6411	15.8159	0.000116206	0.000105848	56108.5	21	7	18	1	3	1	1	1
COX7A2	Cytochrome c oxidase subunit 7A2, mitochondrial	P14406	P14406	+	CIV subunits;Complex IV;OXPHOS;OXPHOS subunits	+	1.5845	-0.483071	-2.93752	18.6282	18.7956	18.5898	18.2818	18.1971	18.0482	18.1594	17.8387	0.00235	0.00119	9395.98	2	1	2	2	2	1	1	1
NUP35	Nucleoporin NUP35;Isoform 2 of Nucleoporin NUP35	Q8NFH5;Q8NFH5-2	Q8NFH5;Q8NFH5-2	-		+	1.48571	-0.481867	-3.20704	16.6202	16.7774	16.5811	NaN	16.4451	NaN	16.3034	15.9447	0.00716158	0.00305	34773.75;34773.75-2	4	4	1	NaN	2	NaN	1	2
TUBGCP3	Gamma-tubulin complex component 3	Q96CW5	Q96CW5	-		+	2.68495	-0.480374	-5.17438	15.9301	16.1525	16.1502	16.0385	16.2859	15.7	15.5017	15.6915	0.000784524	0.000493188	103571	12	10	8	8	9	6	5	9
HIF1AN	Hypoxia-inducible factor 1-alpha inhibitor	Q9NWT6	Q9NWT6	-		+	3.36134	-0.479467	-6.96493	16.6928	16.4664	16.4389	16.6062	16.4512	16.0134	16.082	16.0595	0.000216216	0.000171275	40285.4	4	5	4	5	4	4	4	3
CEMIP	Cell migration-inducing and hyaluronan-binding protein	Q8WUJ3	Q8WUJ3	-			0.530539	-0.478433	-1.14778	17.6309	16.5241	16.4541	15.7175	16.2514	16.0319	16.0444	16.0353	2.4e-05	4.14e-05	152998	43	26	27	20	26	20	17	19
FLAD1	FAD synthase;Isoform 2 of FAD synthase;Isoform 3 of FAD synthase	Q8NFF5;Q8NFF5-2;Q8NFF5-3	Q8NFF5;Q8NFF5-2;Q8NFF5-3	+	Metabolism;Vitamin B2 metabolism;Vitamin metabolism	+	3.25228	-0.475536	-6.64823	16.2436	16.244	16.3885	16.2993	16.3648	15.6702	15.9158	15.9115	0.000132	0.000116	65265.56;65265.56-2;65265.56-3	5	5	7	6	4	3	4	5
TOR1AIP1	Torsin-1A-interacting protein 1	Q5JTV8	Q5JTV8	-		+	3.50677	-0.475336	-7.40622	17.3795	17.3063	17.4732	17.5049	17.3941	16.9818	17.0092	16.8179	0.000107	0.0001	66248.4	13	13	14	13	14	8	10	8
FAM126A	Hyccin;Isoform 3 of Hyccin	Q9BYI3;Q9BYI3-3	Q9BYI3;Q9BYI3-3	-		+	2.93159	-0.475196	-5.78163	15.3752	15.6488	15.7095	15.6694	15.5667	15.1565	15.14	15.0597	0.00112	0.000662	57625.42;57625.42-3	5	5	5	5	5	4	4	6
RELCH	Isoform 2 of RAB11-binding protein RELCH	Q9P260-2	Q9P260-2	-		+	3.23892	-0.47517	-6.61022	15.8799	15.9903	15.851	16.1239	15.9265	15.5605	15.4626	15.4143	0.00029	0.000218	138744	18	19	18	18	16	6	13	11
OSBPL3	Oxysterol-binding protein-related protein 3	Q9H4L5	Q9H4L5	-		+	2.39778	-0.474888	-4.52377	16.6318	16.8525	16.543	16.6939	16.5085	16.2824	15.9915	16.2393	8.82e-05	8.75e-05	101224	19	22	19	19	19	9	11	12
SURF1	Surfeit locus protein 1;Isoform 2 of Surfeit locus protein 1	Q15526;Q15526-2	Q15526;Q15526-2	+	CIV assembly factors;Complex IV;OXPHOS;OXPHOS assembly factors		1.22595	-0.474647	-2.32015	16.3	16.3664	16.7793	16.4188	16.5788	16.0158	15.6114	16.4149	0.00218	0.00113	33331.4;33331.4-2	2	2	2	2	2	2	3	2
QDPR	Dihydropteridine reductase	P09417	P09417	+	Folate and 1-C metabolism;Metabolism;Metals and cofactors;Tetrahydobiopterin synthesis;Vitamin metabolism	+	3.33631	-0.474141	-6.8912	17.4739	17.5396	17.3502	17.2868	17.3214	16.9124	16.8655	16.9829	1.49e-05	3.47e-05	25789.5	7	6	6	6	7	6	7	5
RNF121	RING finger protein 121	Q9H920	Q9H920	-			0.971599	-0.473255	-1.89601	14.8902	15.3386	15.3454	15.419	14.9608	15.2659	14.377	14.5098	0.00198666	0.00106234	37882.5	2	2	2	2	2	1	2	2
PEA15	Astrocytic phosphoprotein PEA-15;Isoform 2 of Astrocytic phosphoprotein PEA-15	Q15121;Q15121-2	Q15121;Q15121-2	-		+	2.18253	-0.473056	-4.07098	18.9061	19.2298	18.8107	18.8077	18.778	18.3449	18.4686	18.4867	0.000100214	9.56e-05	15040.09;15040.09-2	4	4	4	4	5	4	4	5
CD59	CD59 glycoprotein;Isoform 2 of CD59 glycoprotein	P13987;P13987-2	P13987;P13987-2	-		+	2.08342	-0.473051	-3.87141	20.4954	20.1086	20.5207	20.225	20.1033	19.819	19.8333	19.8003	1.09e-05	3.36e-05	14177.28;14177.28-2	4	4	4	4	4	4	4	4
MRPL53	39S ribosomal protein L53, mitochondrial	Q96EL3	Q96EL3	+	LSU;Mitochondrial central dogma;Mitochondrial ribosome;Translation	+	1.68958	-0.472471	-3.12566	16.5938	16.5937	16.4544	16.6243	16.7823	16.2876	15.7718	16.3522	0.0022	0.00114	12106.8	2	2	1	1	2	3	3	3
SHC1	SHC-transforming protein 1;Isoform p52Shc of SHC-transforming protein 1;Isoform 6 of SHC-transforming protein 1;Isoform 7 of SHC-transforming protein 1	P29353;P29353-2;P29353-6;P29353-7	P29353;P29353-2;P29353-6;P29353-7	-		+	1.8988	-0.471794	-3.51308	17.2864	16.9583	16.8825	16.733	17.1138	16.6263	16.4203	16.5224	5.08e-05	5.99e-05	62822.1;62822.1-2;62822.1-6;62822.1-7	9	12	11	11	11	7	10	8
NRBP2	Nuclear receptor-binding protein 2	Q9NSY0	Q9NSY0	-		+	1.95829	-0.471506	-3.62675	16.4694	16.6757	16.6889	16.2483	16.3628	15.977	16.1767	15.8988	0.00251353	0.00124611	57803.1	6	5	3	2	4	4	1	4
SEC24B	Protein transport protein Sec24B;Isoform 2 of Protein transport protein Sec24B;Isoform 3 of Protein transport protein Sec24B	O95487;O95487-2;O95487-3	O95487;O95487-2;O95487-3	-		+	4.37698	-0.471209	-10.5792	16.7857	16.8985	16.7801	16.8697	16.8409	16.3466	16.447	16.2977	1.72e-06	3.26e-05	137417.73;137417.73-2;137417.73-3	14	12	13	14	13	10	14	11
RAI14	Ankycorbin;Isoform 2 of Ankycorbin;Isoform 3 of Ankycorbin;Isoform 4 of Ankycorbin	Q9P0K7;Q9P0K7-2;Q9P0K7-3;Q9P0K7-4	Q9P0K7;Q9P0K7-2;Q9P0K7-3;Q9P0K7-4	-		+	3.88427	-0.470231	-8.66228	17.0783	16.9832	16.9958	16.8343	16.9461	16.4825	16.5302	16.4793	4.11e-06	3.26e-05	110041.27;110041.27-2;110041.27-3;110041.27-4	38	40	39	38	37	26	31	31
CAVIN1	Caveolae-associated protein 1	Q6NZI2	Q6NZI2	-		+	1.92042	-0.469594	-3.55419	19.3328	19.9125	19.654	19.5267	19.639	19.2292	19.04	19.1609	4.47e-06	3.26e-05	43476.1	16	18	16	18	17	16	17	16
AIMP2	Aminoacyl tRNA synthase complex-interacting multifunctional protein 2	Q13155	Q13155	-		+	1.9579	-0.469571	-3.62599	17.2592	17.5302	17.7632	17.5711	17.3348	17.096	16.8844	17.0859	9.13e-05	8.95e-05	35348.8	9	8	9	9	9	8	7	8
EHD2	EH domain-containing protein 2	Q9NZN4	Q9NZN4	-		+	2.31902	-0.469458	-4.35487	18.9219	19.4028	19.2658	19.1472	19.1118	18.6921	18.7346	18.6747	5.75e-06	3.26e-05	61161.4	29	30	30	30	29	29	29	28
TTC39C	Tetratricopeptide repeat protein 39C;Isoform 2 of Tetratricopeptide repeat protein 39C	Q8N584;Q8N584-2	Q8N584;Q8N584-2	-		+	1.50837	-0.469294	-2.80353	16.3759	16.5253	16.2092	16.3943	16.2294	16.1066	16.0535	15.4724	0.00284	0.00133	65869.74;65869.74-2	4	3	3	4	4	4	3	2
UBE2F	NEDD8-conjugating enzyme UBE2F;Isoform 2 of NEDD8-conjugating enzyme UBE2F;Isoform 6 of NEDD8-conjugating enzyme UBE2F	Q969M7;Q969M7-2;Q969M7-6	Q969M7;Q969M7-2;Q969M7-6	-			0.579401	-0.469213	-1.25966	15.5342	14.5273	15.8784	15.3088	15.3572	14.8099	14.8941	NaN	0.00265	0.00128	21076.99;21076.99-2;21076.99-6	3	3	2	2	4	1	1	NaN
ERAP2	Endoplasmic reticulum aminopeptidase 2;Isoform 3 of Endoplasmic reticulum aminopeptidase 2	Q6P179;Q6P179-3	Q6P179;Q6P179-3	-			0.854202	-0.469206	-1.99581	16.2942	16.924	NaN	NaN	NaN	16.1456	16.1536	16.1204	0.000579	0.000387	110461.69;110461.69-3	14	18	NaN	NaN	NaN	15	15	15
KIF23	Kinesin-like protein KIF23;Isoform 2 of Kinesin-like protein KIF23	Q02241;Q02241-2	Q02241;Q02241-2	-			0.429479	-0.468907	-0.98025	16.4246	17.832	NaN	16.058	16.2818	16.3144	16.1261	16.1001	0.00316736	0.00140531	110058.81;110058.81-2	4	3	NaN	7	4	3	2	3
ZC3H7B	Zinc finger CCCH domain-containing protein 7B	Q9UGR2	Q9UGR2	-		+	1.76652	-0.468698	-3.26603	16.6613	16.7137	16.1641	16.4063	16.7038	16.0668	16.0326	16.084	0.000114	0.000105	109858	7	9	5	7	8	5	7	5
NECAP1	Adaptin ear-binding coat-associated protein 1	Q8NC96	Q8NC96	-			0.420833	-0.468258	-0.96369	16.9548	16.4544	16.2044	16.7499	16.4732	15.2776	16.9205	NaN	0.0139321	0.00574268	29737.4	2	1	1	1	2	2	1	NaN
ERBIN	Erbin;Isoform 2 of Erbin;Isoform 3 of Erbin;Isoform 5 of Erbin;Isoform 8 of Erbin;Isoform 9 of Erbin	Q96RT1;Q96RT1-2;Q96RT1-3;Q96RT1-5;Q96RT1-8;Q96RT1-9	Q96RT1;Q96RT1-2;Q96RT1-3;Q96RT1-5;Q96RT1-8;Q96RT1-9	-		+	2.36217	-0.467956	-4.44693	16.3373	16.5689	16.1832	16.1515	16.4483	15.8676	15.8844	15.8576	0.000129282	0.000114634	158298.11;158298.11-2;158298.11-3;158298.11-5;158298.11-8;158298.11-9	17	26	15	16	19	7	14	11
PSME1	Proteasome activator complex subunit 1	Q06323	Q06323	-		+	1.51425	-0.467817	-2.81382	17.574	18.1307	18.0955	17.85	17.5692	17.2806	17.4649	17.3826	3.23e-05	4.72e-05	28723.1	16	17	16	17	16	17	16	19
DDX47	Probable ATP-dependent RNA helicase DDX47	Q9H0S4	Q9H0S4	-		+	1.67337	-0.46752	-3.09637	16.2712	16.0897	15.9818	16.3568	16.5203	15.5656	15.821	15.9428	4.41e-05	5.52e-05	50646.5	9	5	5	8	7	5	7	7
GALNT5	Polypeptide N-acetylgalactosaminyltransferase 5	Q7Z7M9	Q7Z7M9	-		+	2.19623	-0.467207	-4.09899	16.8249	16.6318	16.6839	16.9769	16.475	16.2459	16.2559	16.252	0.000616	0.000406	106266	14	10	13	16	8	8	7	7
MRPS31	28S ribosomal protein S31, mitochondrial	Q92665	Q92665	+	Mitochondrial central dogma;Mitochondrial ribosome;SSU;Translation	+	3.006	-0.467185	-5.97456	15.5101	15.2714	15.5016	15.3094	15.4067	14.849	14.9001	15.0488	0.000765	0.000483	45318.5	5	3	3	5	7	5	4	5
LSM14B	Protein LSM14 homolog B	Q9BX40	Q9BX40	-		+	1.44598	-0.467179	-2.69504	16.3563	16.2787	16.0874	15.6546	16.3161	15.63	15.6862	15.6981	0.000987	0.000595	42070.7	5	3	3	2	3	2	3	2
POLE3	DNA polymerase epsilon subunit 3	Q9NRF9	Q9NRF9	-		+	1.91406	-0.466472	-3.54208	16.9277	16.6752	16.4465	16.8459	16.9905	16.3389	16.2708	16.3224	2.8e-06	3.26e-05	16859.6	1	1	1	2	2	1	2	1
EARS2	Probable glutamate--tRNA ligase, mitochondrial;Isoform 2 of Probable glutamate--tRNA ligase, mitochondrial	Q5JPH6;Q5JPH6-2	Q5JPH6;Q5JPH6-2	+	Mitochondrial central dogma;mt-tRNA synthetases;Translation	+	1.44889	-0.466462	-2.70008	16.0477	16.126	16.6705	16.342	16.0934	15.9314	15.5777	15.8592	0.00279	0.00132	58688.59;58688.59-2	4	4	2	4	3	3	6	5
RFX1	MHC class II regulatory factor RFX1	P22670	P22670	-			0.375252	-0.464811	-0.928915	NaN	15.8558	NaN	NaN	17.1957	16.027	16.046	16.1098	0.00754	0.00321	104758	NaN	4	NaN	NaN	2	1	2	2
MVP	Major vault protein	Q14764	Q14764	-		+	2.01284	-0.464604	-3.73244	19.3586	19.2741	18.9484	18.876	19.0499	18.6226	18.6194	18.6683	2.86e-06	3.26e-05	99326.9	47	47	46	45	46	46	44	46
LPCAT4	Lysophospholipid acyltransferase LPCAT4	Q643R3	Q643R3	-			0.721498	-0.46426	-1.47797	17.4737	17.1421	16.5373	16.891	16.8786	16.7511	15.8823	16.9274	2.05e-05	3.84e-05	57219.2	2	2	1	2	1	2	2	1
UBE2D2	Ubiquitin-conjugating enzyme E2 D2	P62837	P62837	-			0.906167	-0.463316	-1.78729	18.4863	18.3709	18.2767	18.5102	18.8362	18.375	18.3091	17.4141	0.000842352	0.00052187	16735.2	2	2	2	2	2	3	3	3
TTC27	Tetratricopeptide repeat protein 27	Q6P3X3	Q6P3X3	-		+	1.61675	-0.46331	-2.99484	16.3102	16.2458	16.0909	15.9826	16.0561	15.9477	15.7398	15.3339	0.00284817	0.00132835	96632.4	7	6	5	2	5	2	4	4
SLC9A3R1	Na(+)/H(+) exchange regulatory cofactor NHE-RF1	O14745	O14745	-			0.944037	-0.463035	-1.85024	16.5482	16.2986	15.7719	15.5488	16.1162	15.4042	15.7515	15.6255	3.58e-05	4.96e-05	38868.4	11	9	5	5	7	4	5	5
TRNT1	CCA tRNA nucleotidyltransferase 1, mitochondrial;Isoform 2 of CCA tRNA nucleotidyltransferase 1, mitochondrial	Q96Q11;Q96Q11-2	Q96Q11;Q96Q11-2	+	Mitochondrial central dogma;mtRNA metabolism;mt-tRNA modifications	+	2.67163	-0.463027	-5.14291	16.201	16.1831	16.4116	16.0668	16.19	15.6231	15.8626	15.7567	0.00028375	0.00021467	50127.57;50127.57-2	11	11	10	9	11	8	8	10
TTPAL	Alpha-tocopherol transfer protein-like	Q9BTX7	Q9BTX7	-		+	1.81444	-0.462912	-3.35466	16.1037	15.7475	15.9277	15.7446	15.9071	15.6446	15.4737	15.1514	0.002	0.00107	38515.2	7	4	2	5	5	2	2	2
SAMD4B	Protein Smaug homolog 2	Q5PRF9	Q5PRF9	-			1.29506	-0.462729	-2.4368	15.8702	16.259	15.4429	15.6164	15.7736	15.3964	15.4008	15.1919	0.00103106	0.000617529	75483.5	5	3	4	3	4	4	6	3
ABCD1	ATP-binding cassette sub-family D member 1	P33897	P33897	+	ABC transporters;Small molecule transport	+	2.18664	-0.462126	-4.07938	16.4251	16.3654	16.6415	16.4941	16.1326	15.9964	15.9007	15.9518	0.000533893	0.000363288	82936.9	4	4	2	4	4	3	3	3
POLDIP3	Polymerase delta-interacting protein 3	Q9BY77	Q9BY77	-			1.03058	-0.460451	-1.99397	16.8503	16.6281	16.4945	15.9608	16.8921	16.023	16.2628	16.0284	2.93e-05	4.49e-05	46089.3	4	4	4	3	5	4	4	4
TCAF1	TRPM8 channel-associated factor 1	Q9Y4C2	Q9Y4C2	-		+	1.74896	-0.459776	-3.23379	16.2652	16.0182	15.7346	16.2909	16.2102	15.5852	15.7292	15.6177	0.00021891	0.000172999	102126	15	13	11	16	13	7	13	12
YARS2	Tyrosine--tRNA ligase, mitochondrial	Q9Y2Z4	Q9Y2Z4	+	Mitochondrial central dogma;mt-tRNA synthetases;Translation	+	2.18853	-0.459683	-4.08324	15.6789	15.7752	15.8118	15.7748	16.0416	15.57	15.2246	15.2756	0.000255637	0.000196903	53199	7	5	5	5	6	4	6	4
SMDT1	Essential MCU regulator, mitochondrial	Q9H4I9	Q9H4I9	+	Calcium cycle;Calcium homeostasis;Calcium uniporter;Signaling;Small molecule transport	+	1.69433	-0.459387	-3.13426	16.5406	16.4222	16.5394	16.0831	16.1756	16.0195	15.6906	15.9683	0.00182506	0.00099271	11441.2	2	2	2	2	2	2	2	2
TOM1	Target of Myb protein 1	O60784	O60784	-		+	1.55359	-0.459308	-2.88289	17.7491	17.8238	18.2469	17.8826	17.5102	17.3975	17.3939	17.3583	5.47e-05	6.28e-05	53818.4	14	14	13	14	13	12	12	13
MRGPRF	Mas-related G-protein coupled receptor member F	Q96AM1	Q96AM1	-		+	1.73935	-0.459074	-3.21619	18.0657	18.0193	17.5321	17.7268	18.0438	17.427	17.4583	17.3702	1.82e-05	3.64e-05	38171.4	2	2	1	1	2	1	1	1
AKAP9	A-kinase anchor protein 9;Isoform 1 of A-kinase anchor protein 9;Isoform 3 of A-kinase anchor protein 9;Isoform 5 of A-kinase anchor protein 9;Isoform 6 of A-kinase anchor protein 9	Q99996;Q99996-1;Q99996-3;Q99996-5;Q99996-6	Q99996;Q99996-1;Q99996-3;Q99996-5;Q99996-6	-		+	1.88919	-0.458144	-3.49487	15.5444	15.572	15.2909	15.5783	15.3599	15.2303	15.0583	14.7443	0.00105	0.000627	452987.18;452987.18-1;452987.18-3;452987.18-5;452987.18-6	6	5	5	5	8	4	3	3
NQO1	NAD(P)H dehydrogenase [quinone] 1;Isoform 2 of NAD(P)H dehydrogenase [quinone] 1	P15559;P15559-2	P15559;P15559-2	-			0.465186	-0.457724	-1.03025	18.121	19.5938	19.0994	19.4948	18.0389	18.3869	18.4487	18.4	2.57e-06	3.26e-05	30867.64;30867.64-2	11	12	11	11	12	11	11	11
APOOL	MICOS complex subunit MIC27	Q6UXV4	Q6UXV4	+	Cristae formation;MICOS complex;Mitochondrial dynamics and surveillance	+	2.08398	-0.457632	-3.87252	16.3841	16.3702	16.675	16.5579	16.3827	16.2497	15.9199	15.8795	0.00115	0.000678	29158.9	5	6	6	5	6	1	2	3
PTPN13	Tyrosine-protein phosphatase non-receptor type 13;Isoform 2 of Tyrosine-protein phosphatase non-receptor type 13;Isoform 3 of Tyrosine-protein phosphatase non-receptor type 13;Isoform 4 of Tyrosine-protein phosphatase non-receptor type 13	Q12923;Q12923-2;Q12923-3;Q12923-4	Q12923;Q12923-2;Q12923-3;Q12923-4	-			1.00701	-0.457517	-1.95482	16.2735	15.9716	16.3491	16.0983	15.3783	15.524	15.6781	15.4679	0.00293	0.00134	276905.57;276905.57-2;276905.57-3;276905.57-4	13	8	9	8	3	11	9	7
MYL12B;MYL12A	Myosin regulatory light chain 12B;Myosin regulatory light chain 12A	O14950;P19105	O14950;P19105	-		+	3.09952	-0.456418	-6.22384	21.3565	21.2753	21.4295	21.2742	21.5175	20.9664	20.8082	20.968	1.09e-05	3.36e-05	19779.15;19794.13	3	3	3	3	3	3	3	3
SLC9A6	Isoform 2 of Sodium/hydrogen exchanger 6;Isoform 3 of Sodium/hydrogen exchanger 6	Q92581-2;Q92581-3	Q92581-2;Q92581-3	-		+	1.87576	-0.455983	-3.46949	15.8802	16.1459	15.7866	15.777	15.6847	15.5144	15.1842	15.4981	0.0111594	0.00465056	72260.27;77916.86	3	2	3	3	3	1	3	3
GBF1	Golgi-specific brefeldin A-resistance guanine nucleotide exchange factor 1;Isoform 2 of Golgi-specific brefeldin A-resistance guanine nucleotide exchange factor 1;Isoform 3 of Golgi-specific brefeldin A-resistance guanine nucleotide exchange factor 1	Q92538;Q92538-2;Q92538-3	Q92538;Q92538-2;Q92538-3	-		+	6.91625	-0.454614	-28.5892	16.9053	16.8796	16.9045	16.8771	16.8635	16.4007	16.4534	16.4401	3.85e-05	5.12e-05	206445.89;206445.89-2;206445.89-3	40	36	33	39	38	29	30	35
ADI1	1,2-dihydroxy-3-keto-5-methylthiopentene dioxygenase	Q9BV57	Q9BV57	-		+	1.6851	-0.454487	-3.11756	17.0565	17.4284	16.8793	16.8626	16.8995	16.5561	16.6546	16.5017	1.21e-05	3.37e-05	21498.4	10	10	10	9	10	10	10	10
HRAS	GTPase HRas	P01112	P01112	-			0.697673	-0.453506	-1.47356	16.4743	15.6077	16.5437	16.6113	16.3511	15.9331	NaN	15.7951	0.00226	0.00116	21298.1	2	2	2	2	2	1	NaN	1
DIAPH1	Protein diaphanous homolog 1	O60610	O60610	-		+	2.71917	-0.45347	-5.25581	16.9693	16.829	16.7089	16.6306	16.9103	16.3024	16.358	16.408	7.33e-05	7.65e-05	141347	30	28	24	26	32	19	23	17
STAU1	Double-stranded RNA-binding protein Staufen homolog 1;Isoform Short of Double-stranded RNA-binding protein Staufen homolog 1	O95793;O95793-2	O95793;O95793-2	-		+	2.98882	-0.453101	-5.92958	17.0948	16.994	16.8752	16.8393	16.9585	16.5183	16.3794	16.6001	0.000141	0.000122	63182.28;63182.28-2	19	18	17	14	17	14	10	12
EMC8	ER membrane protein complex subunit 8	O43402	O43402	-		+	3.50237	-0.452176	-7.39252	15.7218	15.8845	15.7094	15.7583	15.699	15.2852	15.4073	15.2148	0.000842	0.000522	23773	4	3	4	5	4	2	2	4
DNAJC11	DnaJ homolog subfamily C member 11;Isoform 3 of DnaJ homolog subfamily C member 11	Q9NVH1;Q9NVH1-3	Q9NVH1;Q9NVH1-3	+	Protein import, sorting and homeostasis;Intramitochondrial membrane interactions;Mitochondrial dynamics and surveillance;Protein import and sorting	+	3.28349	-0.450659	-6.73766	16.9709	16.8223	16.999	16.9368	17.0178	16.6285	16.4096	16.4582	0.000261	0.0002	63278.08;63278.08-3	9	8	9	8	8	3	7	5
PLGRKT	Plasminogen receptor (KT)	Q9HBL7	Q9HBL7	+	0		0.333923	-0.450509	-0.793374	17.0847	15.3483	17.5029	NaN	16.9332	16.5124	16.1304	16.1575	0.00276	0.00131	17201.3	3	2	4	NaN	3	1	1	2
NUMA1	Nuclear mitotic apparatus protein 1	Q14980	Q14980	-		+	3.26544	-0.450122	-6.68582	16.1095	16.3157	16.0675	16.1637	16.271	15.7397	15.7903	15.6761	1.57e-05	3.52e-05	238260	55	58	50	50	54	35	42	39
FBXO22	F-box only protein 22	Q8NEZ5	Q8NEZ5	-		+	2.32396	-0.449575	-4.36535	16.9082	17.3205	17.1752	17.1901	16.9655	16.662	16.6997	16.6253	0.00216944	0.00113163	44508.3	4	3	4	5	2	5	4	5
CAT	Catalase	P04040	P04040	+	Detoxification;Metabolism;ROS and glutathione metabolism		0.991116	-0.449556	-1.92843	17.4207	17.4942	17.0677	16.5521	17.3949	16.7467	16.7023	16.7601	3.46e-06	3.26e-05	59756.2	22	19	18	14	22	17	15	18
SLC66A3	Solute carrier family 66 member 3;Isoform 2 of Solute carrier family 66 member 3	Q8N755;Q8N755-2	Q8N755;Q8N755-2	-			1.10753	-0.448916	-2.12201	17.9443	17.8492	18.115	17.6402	17.801	17.9186	17.1069	17.2375	0.000986	0.000594	22574.98;22574.98-2	1	2	2	1	2	2	1	2
LGALS3	Galectin-3	P17931	P17931	-		+	1.5335	-0.447854	-2.84757	18.762	19.2047	19.1384	18.8625	18.5756	18.5026	18.4219	18.4578	8.42e-06	3.33e-05	26152.3	7	6	7	6	6	6	6	7
ITIH2	Inter-alpha-trypsin inhibitor heavy chain H2	P19823	P19823	-			0.207769	-0.447299	-0.528485	16.4004	13.4695	16.0104	15.0546	15.1828	14.7215	NaN	14.831	3.25e-05	4.72e-05	106463	2	2	3	1	3	2	NaN	1
CAPN7	Calpain-7	Q9Y6W3	Q9Y6W3	-		+	1.46972	-0.447295	-2.73619	15.7648	15.4669	16.0093	15.8716	15.4666	15.3403	15.4	15.0653	0.00302	0.00136	92652.4	4	2	4	5	6	3	2	2
PFN2	Isoform IIb of Profilin-2	P35080-2	P35080-2	-		+	2.29147	-0.446876	-4.2967	18.3286	18.5917	18.171	18.3247	18.3701	17.9924	17.7697	17.9689	5.51e-06	3.26e-05	15088.3	7	7	7	7	7	6	7	6
KYAT3	Kynurenine--oxoglutarate transaminase 3;Isoform 3 of Kynurenine--oxoglutarate transaminase 3	Q6YP21;Q6YP21-3	Q6YP21;Q6YP21-3	+	Amino acid metabolism;Kynurenine metabolism;Metabolism;Metals and cofactors;NAD biosynthesis and metabolism		1.20975	-0.444923	-2.29293	16.6644	17.5038	17.186	16.9136	16.8968	16.544	16.5511	16.6689	4.64e-05	5.67e-05	51400.37;51400.37-3	5	11	11	8	12	8	8	7
PPM1G	Protein phosphatase 1G	O15355	O15355	-		+	2.16241	-0.444107	-4.03003	16.7975	16.7134	16.4618	16.4655	16.6654	16.0042	16.2835	16.2422	0.000603	0.0004	59271.6	14	12	12	12	12	11	12	11
MOCS2	Molybdopterin synthase catalytic subunit	O96007	O96007	-		+	2.3113	-0.44376	-4.33853	16.888	16.7734	16.6835	16.6688	16.9421	16.1505	16.4622	16.4295	0.00271733	0.00130111	20944	3	2	3	2	3	2	2	3
ZBTB8OS	Protein archease	Q8IWT0	Q8IWT0	-		+	2.0908	-0.443691	-3.88608	17.3981	17.2577	17.2273	17.3799	17.0487	17.0093	16.8039	16.6428	0.000153086	0.000130561	19490.8	1	2	1	1	1	1	1	1
METAP2	Methionine aminopeptidase 2	P50579	P50579	-		+	2.60515	-0.44368	-4.98782	16.1555	16.338	16.3863	16.5658	16.4076	15.9394	15.9502	15.8912	1.29e-05	3.38e-05	52891.6	9	13	12	11	11	9	9	10
NELFA	Negative elongation factor A	Q9H3P2	Q9H3P2	-			0.903917	-0.443392	-1.8424	16.2564	15.6364	15.4991	NaN	16.1977	15.5681	15.2722	15.5216	0.00656428	0.00280812	57276.8	3	3	4	NaN	3	2	2	2
EI24	Etoposide-induced protein 2.4 homolog	O14681	O14681	-		+	1.39423	-0.442674	-2.60587	16.3214	16.2911	16.2156	16.0185	16.2222	15.421	16.1524	15.7399	0.00221037	0.00114532	38964.7	4	4	4	3	4	2	4	3
CCM2	Cerebral cavernous malformations 2 protein;Isoform 2 of Cerebral cavernous malformations 2 protein;Isoform 4 of Cerebral cavernous malformations 2 protein	Q9BSQ5;Q9BSQ5-2;Q9BSQ5-4	Q9BSQ5;Q9BSQ5-2;Q9BSQ5-4	-		+	2.81907	-0.442328	-5.49863	15.7724	15.9525	15.74	15.8277	15.587	15.3039	15.3661	15.3308	0.00207975	0.0010998	48836.78;48836.78-2;48836.78-4	4	4	4	3	2	3	3	3
FCHSD1	F-BAR and double SH3 domains protein 1	Q86WN1	Q86WN1	-		+	1.66858	-0.441552	-3.08774	16.2575	16.4858	16.3219	16.1979	16.067	16.109	15.6021	15.7622	0.0013124	0.000754365	76942.2	3	3	2	1	2	1	1	1
LMNB1	Lamin-B1	P20700	P20700	-		+	4.26547	-0.441076	-10.1149	17.5448	17.657	17.642	17.5757	17.6556	17.1792	17.2446	17.098	1.3e-05	3.39e-05	66408.3	24	25	26	24	24	21	23	24
COMMD1	COMM domain-containing protein 1;Isoform 2 of COMM domain-containing protein 1	Q8N668;Q8N668-2	Q8N668;Q8N668-2	-			0.111359	-0.440752	-0.303375	15.8429	16.6494	17.9481	12.8211	16.2774	14.8773	NaN	16.0568	0.0147	0.00605	21178.09;21178.09-2	2	3	1	1	3	1	NaN	2
RTF1	RNA polymerase-associated protein RTF1 homolog	Q92541	Q92541	-		+	3.64294	-0.440655	-7.84013	15.1403	15.0421	15.1067	15.0209	15.2365	14.6603	14.7273	14.6183	0.000614	0.000406	80313.5	5	5	3	2	6	3	2	3
TAOK3	Serine/threonine-protein kinase TAO3	Q9H2K8	Q9H2K8	-		+	2.30048	-0.440532	-4.31566	16.0451	16.0988	15.7692	15.7221	15.9342	15.4518	15.5432	15.4251	0.000274146	0.00020828	105406	12	11	7	8	11	7	9	9
AP2A1	AP-2 complex subunit alpha-1;Isoform B of AP-2 complex subunit alpha-1	O95782;O95782-2	O95782;O95782-2	-		+	4.77326	-0.439969	-12.392	17.8961	17.8034	17.8327	17.7917	17.7869	17.3299	17.4398	17.3768	2.17e-05	3.94e-05	107545.88;107545.88-2	28	28	26	26	28	26	29	28
RB1	Retinoblastoma-associated protein	P06400	P06400	-			0.828546	-0.439944	-1.78736	15.0154	NaN	NaN	14.602	14.4824	14.5892	14.2447	13.9462	0.0112404	0.00468185	106159	3	NaN	NaN	1	4	3	3	1
BRD4	Bromodomain-containing protein 4	O60885	O60885	-			0.781519	-0.439565	-1.57916	15.9099	15.9301	15.5952	14.9875	15.8876	14.8426	15.4884	15.3364	0.00259223	0.0012671	152219	5	5	7	2	6	3	3	3
CEPT1	Choline/ethanolaminephosphotransferase 1	Q9Y6K0	Q9Y6K0	-		+	2.42636	-0.439407	-4.58603	17.5168	17.658	17.5927	17.931	17.6186	17.2541	17.2387	17.1792	0.00439	0.0019	46553.6	2	1	1	1	2	2	2	3
GIGYF2	GRB10-interacting GYF protein 2;Isoform 3 of GRB10-interacting GYF protein 2;Isoform 4 of GRB10-interacting GYF protein 2	Q6Y7W6;Q6Y7W6-4;Q6Y7W6-5	Q6Y7W6;Q6Y7W6-4;Q6Y7W6-5	-		+	1.90367	-0.439202	-3.52232	16.2951	16.037	15.7993	15.8976	15.9923	15.5509	15.7053	15.4391	0.000146014	0.000125523	150069.96;150069.96-4;150069.96-5	15	15	12	9	13	5	7	6
BCLAF1	Bcl-2-associated transcription factor 1;Isoform 2 of Bcl-2-associated transcription factor 1	Q9NYF8;Q9NYF8-2	Q9NYF8;Q9NYF8-2	-		+	2.82484	-0.439174	-5.51288	16.2406	16.2	16.0964	16.0887	16.1856	15.5562	15.8833	15.7297	1.04e-05	3.35e-05	106122.11;106122.11-2	13	10	11	12	13	8	11	9
NRBP1	Nuclear receptor-binding protein	Q9UHY1	Q9UHY1	-		+	1.57897	-0.439106	-2.92771	17.3101	17.3499	17.2184	16.7376	17.2619	16.7395	16.7764	16.6934	0.000116	0.000106	59844.7	10	10	10	8	9	7	9	8
MYD88	Myeloid differentiation primary response protein MyD88;Isoform 5 of Myeloid differentiation primary response protein MyD88;Isoform 6 of Myeloid differentiation primary response protein MyD88	Q99836;Q99836-5;Q99836-6	Q99836;Q99836-5;Q99836-6	-		+	1.99636	-0.439075	-3.70036	16.1994	16.3127	16.0398	16.1149	16.2894	15.6628	15.5809	16.0127	0.000139524	0.000121223	33233.35;33233.35-5;33233.35-6	10	6	7	9	9	5	3	2
GPX4	Phospholipid hydroperoxide glutathione peroxidase;Isoform Cytoplasmic of Phospholipid hydroperoxide glutathione peroxidase	P36969;P36969-2	P36969;P36969-2	+	Detoxification;Metabolism;ROS and glutathione metabolism;Selenoproteins		0.957197	-0.439052	-1.8721	16.7991	17.0931	17.3961	17.0015	16.3514	16.4496	16.5971	16.4209	4.46e-05	5.55e-05	22174.68;22174.68-2	7	6	7	7	6	6	7	6
CIP2A	Protein CIP2A	Q8TCG1	Q8TCG1	-		+	1.37096	-0.438919	-2.56599	16.4536	16.2057	15.908	16.1255	16.2699	15.4186	15.8989	15.9434	0.00144565	0.000817306	102185	7	6	3	4	8	2	2	3
CTDP1	RNA polymerase II subunit A C-terminal domain phosphatase;Isoform 4 of RNA polymerase II subunit A C-terminal domain phosphatase	Q9Y5B0;Q9Y5B0-4	Q9Y5B0;Q9Y5B0-4	-			0.469945	-0.438507	-1.05699	15.191	15.7274	15.3116	14.2336	15.2732	NaN	14.6275	14.7901	0.000603723	0.000400429	104399.2;104399.2-4	4	4	1	2	5	NaN	2	1
STIM1	Stromal interaction molecule 1	Q13586	Q13586	-		+	3.40672	-0.43821	-7.10027	16.2086	16.4703	16.292	16.3698	16.3902	15.9522	15.895	15.8768	1.43e-05	3.46e-05	77423.4	15	15	16	10	14	9	11	10
PPP1CC	Serine/threonine-protein phosphatase PP1-gamma catalytic subunit;Isoform 2 of Serine/threonine-protein phosphatase PP1-gamma catalytic subunit	P36873;P36873-2	P36873;P36873-2	mito-interacting		+	2.23194	-0.437806	-4.1725	19.783	19.4958	19.3742	19.3837	19.5905	19.1658	19.0368	19.0604	0.000103	9.75e-05	36983.78;36983.78-2	2	2	2	2	2	2	2	2
CPD	Carboxypeptidase D	O75976	O75976	-		+	3.30876	-0.437521	-6.81077	15.9203	15.9726	15.7287	15.9545	15.981	15.5117	15.4687	15.4413	2.08e-05	3.86e-05	152931	21	26	18	25	21	13	17	16
ACAD11	Acyl-CoA dehydrogenase family member 11	Q709F0	Q709F0	+	Fatty acid oxidation;Lipid metabolism;Metabolism		0.661123	-0.437348	-1.37519	15.8092	16.1915	16.3567	17.1417	16.8332	16.0749	16.1171	15.8953	0.00136	0.000777	87264.4	2	4	3	6	4	2	4	3
PIH1D1	PIH1 domain-containing protein 1	Q9NWS0	Q9NWS0	-		+	3.73455	-0.437117	-8.14397	16.872	16.7486	16.7981	16.7728	16.6509	16.2773	16.3916	16.3252	0.0025454	0.00125421	32362.9	3	3	4	4	2	4	3	4
TUBB3	Tubulin beta-3 chain	Q13509	Q13509	mito-interacting		+	2.02511	-0.43696	-3.75642	19.6022	19.5483	19.2173	19.2134	19.5534	18.9649	19.0152	18.9897	1.5e-05	3.47e-05	50432.7	8	8	7	7	8	7	7	7
ANKRD13A	Ankyrin repeat domain-containing protein 13A	Q8IZ07	Q8IZ07	-		+	1.39741	-0.43677	-2.61133	16.9799	17.3313	16.6838	16.6492	16.9235	16.5561	16.4793	16.3949	0.000434599	0.000307239	67619.1	11	13	7	11	10	11	10	10
LMCD1	LIM and cysteine-rich domains protein 1	Q9NZU5	Q9NZU5	-			0.404673	-0.436724	-0.918367	15.9489	16.8314	18.1096	16.7393	16.4799	16.3879	16.3901	16.3774	2.53e-05	4.24e-05	40832.8	13	18	19	14	17	16	16	15
PRKAA1	5'-AMP-activated protein kinase catalytic subunit alpha-1;Isoform 2 of 5'-AMP-activated protein kinase catalytic subunit alpha-1	Q13131;Q13131-2	Q13131;Q13131-2	-		+	1.90552	-0.436689	-3.52584	17.5125	17.6097	17.8427	17.6662	17.5586	17.3446	17.3247	16.9344	0.000102425	9.68e-05	64009.22;64009.22-2	11	11	12	12	12	9	9	10
PHAX	Phosphorylated adapter RNA export protein	Q9H814	Q9H814	-		+	1.66709	-0.436671	-3.08507	16.0691	15.7516	15.4921	15.6082	15.9135	15.2438	15.3583	15.3886	0.000653721	0.00042813	44402.6	4	5	2	3	4	3	3	3
PIP5K1C	Phosphatidylinositol 4-phosphate 5-kinase type-1 gamma;Isoform 2 of Phosphatidylinositol 4-phosphate 5-kinase type-1 gamma;Isoform 3 of Phosphatidylinositol 4-phosphate 5-kinase type-1 gamma;Isoform 4 of Phosphatidylinositol 4-phosphate 5-kinase type-1 gamma	O60331;O60331-2;O60331-3;O60331-4	O60331;O60331-2;O60331-3;O60331-4	-		+	2.69464	-0.436589	-5.19734	16.6116	16.4185	16.7366	16.6865	16.5242	16.0768	16.2469	16.153	0.00235012	0.00119058	73260.01;73260.01-2;73260.01-3;73260.01-4	5	2	2	3	3	1	3	2
TCEA1	Transcription elongation factor A protein 1	P23193	P23193	-		+	1.95596	-0.436307	-3.62224	16.7471	16.6196	17.1229	16.9922	16.785	16.4084	16.4384	16.4045	3.02e-05	4.58e-05	33969.6	12	10	10	11	10	8	7	11
ARHGEF12	Rho guanine nucleotide exchange factor 12	Q9NZN5	Q9NZN5	-		+	1.948	-0.436029	-3.60696	16.1474	16.1225	15.9552	15.6771	15.9478	15.5347	15.6412	15.426	0.00121	0.000705	173232	13	13	5	9	10	6	11	9
PGAM1	Phosphoglycerate mutase 1	P18669	P18669	-		+	5.04314	-0.435531	-13.788	19.905	19.972	20.0187	19.9904	20.0011	19.5208	19.5902	19.5148	4.75e-06	3.26e-05	28803.9	16	16	15	15	16	14	15	15
DHX29	ATP-dependent RNA helicase DHX29	Q7Z478	Q7Z478	-		+	3.09254	-0.435043	-6.20496	16.106	16.1527	15.9244	16.1384	16.0947	15.7342	15.6774	15.5329	1.61e-05	3.55e-05	155236	23	21	20	22	22	15	11	18
TMTC3	Protein O-mannosyl-transferase TMTC3;Isoform 2 of Protein O-mannosyl-transferase TMTC3	Q6ZXV5;Q6ZXV5-2	Q6ZXV5;Q6ZXV5-2	-		+	3.43927	-0.434975	-7.19864	17.0642	16.9219	16.9557	16.9212	16.997	16.4365	16.5117	16.6629	0.000298	0.000224	104008.78;104008.78-2	14	13	12	13	16	10	10	9
AKAP10	A-kinase anchor protein 10, mitochondrial	O43572	O43572	+	cAMP-PKA signaling;Signaling		0.659267	-0.434491	-1.40448	NaN	16.0646	15.5406	16.3917	15.226	15.3304	15.3676	15.4157	0.00782	0.00332	73818.2	NaN	2	1	1	1	1	2	1
NDUFS1	NADH-ubiquinone oxidoreductase 75 kDa subunit, mitochondrial;Isoform 2 of NADH-ubiquinone oxidoreductase 75 kDa subunit, mitochondrial	P28331;P28331-2	P28331;P28331-2	+	CI subunits;Complex I;Fe-S-containing proteins;Metabolism;Metals and cofactors;OXPHOS;OXPHOS subunits	+	3.74321	-0.433699	-8.1732	17.7184	17.8446	17.8703	17.8257	17.6666	17.3299	17.3664	17.3581	5.77e-05	6.52e-05	79467.5;79467.5-2	24	25	24	24	25	20	21	18
PTGES	Prostaglandin E synthase	O14684	O14684	-			1.11511	-0.43363	-2.22425	16.2746	NaN	15.9186	16.2886	15.6113	15.6561	15.5068	15.606	0.000100271	9.56e-05	17102.3	2	NaN	1	2	1	3	2	2
CRKL	Crk-like protein	P46109	P46109	-		+	2.38763	-0.432486	-4.50181	17.8341	17.5979	17.6614	17.5476	17.6913	17.3335	17.0403	17.3281	5.44e-06	3.26e-05	33777	9	9	9	9	9	6	9	8
TOR1B	Torsin-1B	O14657	O14657	-		+	1.65619	-0.431222	-3.06545	17.217	16.9714	16.6152	17.0843	17.0417	16.6353	16.5815	16.4472	3.76e-05	5.06e-05	37978.9	9	9	7	9	8	6	8	9
ARMC6	Armadillo repeat-containing protein 6;Isoform 2 of Armadillo repeat-containing protein 6	Q6NXE6;Q6NXE6-2	Q6NXE6;Q6NXE6-2	-			1.09732	-0.43069	-2.19171	15.7511	16.1819	15.7178	15.6782	15.6163	NaN	15.5492	15.1676	0.00356417	0.00155861	54141.9;54141.9-2	3	4	2	1	2	NaN	2	4
ATP8B2	Phospholipid-transporting ATPase ID;Isoform 3 of Phospholipid-transporting ATPase ID	P98198;P98198-3	P98198;P98198-3	-			1.04966	-0.430287	-2.02569	15.3038	15.5402	15.5673	14.9735	15.1877	14.6415	14.7124	15.2987	0.00056731	0.000380701	137440.27;137440.27-3	2	3	2	3	3	3	4	1
MBNL1	Muscleblind-like protein 1	Q9NR56	Q9NR56	-		+	2.11475	-0.430241	-3.93392	17.5856	17.438	17.3728	17.084	17.4107	16.9474	16.9609	16.9357	7.25e-05	7.59e-05	41817.2	6	7	7	8	8	8	7	8
PKN2	Serine/threonine-protein kinase N2;Isoform 2 of Serine/threonine-protein kinase N2;Isoform 3 of Serine/threonine-protein kinase N2	Q16513;Q16513-2;Q16513-3	Q16513;Q16513-2;Q16513-3	-		+	2.915	-0.429631	-5.73923	16.7497	16.5818	16.4601	16.5509	16.5918	16.0462	16.23	16.1955	0.000934535	0.000568521	112034.6;112034.6-2;112034.6-3	15	15	13	13	18	11	14	14
ABR	Active breakpoint cluster region-related protein;Isoform Short of Active breakpoint cluster region-related protein;Isoform 4 of Active breakpoint cluster region-related protein	Q12979;Q12979-2;Q12979-4	Q12979;Q12979-2;Q12979-4	-		+	1.90295	-0.429563	-3.52096	16.7178	16.7674	16.808	16.4142	16.7546	16.2076	16.1144	16.4665	0.00156522	0.000871636	97597.84;97597.84-2;97597.84-4	9	13	8	8	9	9	8	6
ACADVL	Very long-chain specific acyl-CoA dehydrogenase, mitochondrial;Isoform 2 of Very long-chain specific acyl-CoA dehydrogenase, mitochondrial;Isoform 3 of Very long-chain specific acyl-CoA dehydrogenase, mitochondrial	P49748;P49748-2;P49748-3	P49748;P49748-2;P49748-3	+	Fatty acid oxidation;Lipid metabolism;Metabolism	+	2.22147	-0.428604	-4.15087	18.145	18.194	17.8958	18.1659	18.3767	17.7523	17.7355	17.693	1.1e-05	3.36e-05	70390.11;70390.11-2;70390.11-3	23	23	23	24	23	23	22	21
HMBS	Porphobilinogen deaminase;Isoform 2 of Porphobilinogen deaminase	P08397;P08397-2	P08397;P08397-2	-		+	1.49798	-0.428484	-2.78539	15.8312	15.4946	15.2916	15.2939	15.272	14.8493	15.1072	15.068	0.00135	0.000774	39330.06;39330.06-2	8	7	6	3	8	3	5	3
PRKAR1A	cAMP-dependent protein kinase type I-alpha regulatory subunit	P10644	P10644	-		+	2.59166	-0.428436	-4.95674	18.1175	18.1033	18.052	17.8125	18.1654	17.6303	17.6758	17.559	3.02e-06	3.26e-05	42981.7	16	17	17	17	18	12	16	16
EXT1	Exostosin-1	Q16394	Q16394	-		+	1.79834	-0.428363	-3.57793	16.3136	16.18	NaN	16.6415	16.3922	15.8889	15.9426	16.0288	0.00233	0.00119	86254.8	1	3	NaN	2	3	1	2	2
ZFPL1	Zinc finger protein-like 1	O95159	O95159	-		+	5.45798	-0.427898	-16.228	16.4736	16.5014	16.4551	16.4239	16.4413	16.038	16.0734	15.982	0.00010533	9.88e-05	34114	8	8	8	8	6	7	7	8
PIP5K1A	Phosphatidylinositol 4-phosphate 5-kinase type-1 alpha;Isoform 3 of Phosphatidylinositol 4-phosphate 5-kinase type-1 alpha;Isoform 4 of Phosphatidylinositol 4-phosphate 5-kinase type-1 alpha	Q99755;Q99755-3;Q99755-4	Q99755;Q99755-3;Q99755-4	-		+	2.12421	-0.427504	-3.95291	16.5644	16.5519	16.8684	16.795	16.4488	16.204	16.2764	16.1741	0.000673	0.000437	62633.32;62633.32-3;62633.32-4	6	7	9	6	8	5	5	7
VARS1	Valine--tRNA ligase	P26640	P26640	-		+	3.67941	-0.427191	-7.95991	18.1701	17.9784	18.185	18.0364	18.0976	17.6363	17.669	17.6936	1.57e-05	3.52e-05	140476	43	43	44	41	44	41	41	41
GCDH	Glutaryl-CoA dehydrogenase, mitochondrial	Q92947	Q92947	+	Amino acid metabolism;Lysine metabolism;Metabolism	+	2.44904	-0.42631	-4.63583	16.658	16.513	16.4723	16.2782	16.4872	16.0675	16.1527	15.9461	0.000834	0.000517	48127.2	7	7	6	6	7	6	5	6
GPX8	Probable glutathione peroxidase 8	Q8TED1	Q8TED1	-		+	1.67333	-0.426009	-3.0963	18.5393	18.5316	18.8978	19.0017	18.5315	18.2812	18.2808	18.2611	1.52e-05	3.47e-05	23881	7	7	7	7	7	6	7	6
VAMP3	Vesicle-associated membrane protein 3	Q15836	Q15836	-		+	2.70092	-0.425533	-5.21226	19.3482	19.398	19.1835	19.1528	19.4146	18.7788	18.8979	18.945	0.00018086	0.000148757	11309.1	3	3	3	3	3	3	3	3
CCN1	CCN family member 1	O00622	O00622	-		+	1.42192	-0.425028	-2.6535	16.3153	15.813	16.1677	16.4246	16.4861	15.7999	15.8379	15.8111	4.92e-05	5.9e-05	42026.6	10	6	8	9	9	7	7	7
ARMC10	Armadillo repeat-containing protein 10;Isoform 2 of Armadillo repeat-containing protein 10;Isoform 3 of Armadillo repeat-containing protein 10;Isoform 4 of Armadillo repeat-containing protein 10	Q8N2F6;Q8N2F6-2;Q8N2F6-3;Q8N2F6-4	Q8N2F6;Q8N2F6-2;Q8N2F6-3;Q8N2F6-4	+	Fission;Mitochondrial dynamics and surveillance;Trafficking	+	2.03744	-0.424751	-3.78058	16.024	16.2432	16.4887	16.3912	16.1995	15.7837	15.8128	15.9372	0.0010413	0.000623021	37539.97;37539.97-2;37539.97-3;37539.97-4	3	4	4	4	3	6	3	3
WBP4	WW domain-binding protein 4;Isoform 2 of WW domain-binding protein 4	O75554;O75554-2	O75554;O75554-2	-			0.620828	-0.424715	-1.38097	16.0117	15.4996	15.2689	NaN	16.051	NaN	15.1123	15.4538	0.0030917	0.0013817	42506.79;42506.79-2	1	1	1	NaN	1	NaN	1	2
ENY2	Transcription and mRNA export factor ENY2;Isoform 2 of Transcription and mRNA export factor ENY2	Q9NPA8;Q9NPA8-2	Q9NPA8;Q9NPA8-2	-			1.19511	-0.42455	-2.3718	16.0535	16.5405	16.405	16.1075	NaN	15.9111	16.0516	15.5935	0.0020076	0.00106986	11528.61;11528.61-2	1	1	1	1	NaN	1	1	2
SGSH	N-sulphoglucosamine sulphohydrolase	P51688	P51688	-		+	1.76112	-0.4237	-3.25611	17.6335	17.969	17.9281	18.2479	17.9613	17.5403	17.5273	17.505	4.97e-05	5.94e-05	56695.4	9	10	11	10	12	11	10	10
CCNYL1	Cyclin-Y-like protein 1;Isoform 3 of Cyclin-Y-like protein 1	Q8N7R7;Q8N7R7-3	Q8N7R7;Q8N7R7-3	-			1.13969	-0.423477	-2.17564	15.8457	15.733	15.9617	15.4833	15.327	14.9629	15.5171	15.2599	0.00195424	0.00104763	40705.14;40705.14-3	3	4	1	2	3	2	1	2
ARHGEF1	Rho guanine nucleotide exchange factor 1;Isoform 3 of Rho guanine nucleotide exchange factor 1	Q92888;Q92888-3	Q92888;Q92888-3	-		+	3.78494	-0.423322	-8.31532	16.9796	16.856	16.9447	16.9614	16.972	16.509	16.6218	16.4273	0.000169	0.000141	102435.3;102435.3-3	15	19	17	16	18	15	17	13
UBQLN1	Ubiquilin-1;Isoform 2 of Ubiquilin-1	Q9UMX0;Q9UMX0-2	Q9UMX0;Q9UMX0-2	-		+	1.52383	-0.422933	-2.83059	17.8991	17.7775	17.5772	17.257	17.7477	17.1921	17.2193	17.275	4.53e-05	5.6e-05	62518.89;62518.89-2	9	9	9	9	9	9	9	9
DDRGK1	DDRGK domain-containing protein 1	Q96HY6	Q96HY6	-		+	1.71407	-0.422904	-3.1701	17.1922	17.3874	17.6942	17.6925	17.387	17.1229	17.0332	16.9872	1.55e-05	3.49e-05	35610.9	7	8	8	8	7	4	5	8
THADA	Thyroid adenoma-associated protein;Isoform 3 of Thyroid adenoma-associated protein	Q6YHU6;Q6YHU6-3	Q6YHU6;Q6YHU6-3	-			1.29893	-0.422746	-2.44335	15.9218	16.2174	16.3071	16.0429	15.6487	15.4681	15.5325	15.8138	0.00885	0.00373	219607.2;219607.2-3	4	5	3	3	2	2	2	3
RANBP3	Isoform 2 of Ran-binding protein 3	Q9H6Z4-2	Q9H6Z4-2	-		+	2.78412	-0.422652	-5.4128	16.0716	16.2306	15.9567	15.927	16.0947	15.6673	15.6803	15.5528	8.23e-05	8.34e-05	59694.3	6	5	3	6	6	7	6	7
COG4	Conserved oligomeric Golgi complex subunit 4	Q9H9E3	Q9H9E3	-		+	3.20636	-0.421845	-6.51835	16.3358	16.2659	16.3696	16.3627	16.1389	15.8697	15.9452	15.8032	0.00121676	0.000707696	89083.1	11	9	10	7	10	6	5	4
SRC	Proto-oncogene tyrosine-protein kinase Src;Isoform 2 of Proto-oncogene tyrosine-protein kinase Src	P12931;P12931-2	P12931;P12931-2	-		+	1.81251	-0.421505	-3.35107	17.209	17.0934	17.0534	16.6691	17.1339	16.6089	16.5982	16.6237	1.39e-05	3.43e-05	59834.76;59834.76-2	14	14	15	11	14	11	13	11
SELENOH	Selenoprotein H	Q8IZQ5	Q8IZQ5	-			0.700828	-0.420793	-1.44291	15.9234	15.9703	16.2478	16.3409	15.1991	15.2857	15.8203	15.4405	0.0033	0.00145	13453.4	2	2	2	3	2	2	1	2
FLOT1	Flotillin-1	O75955	O75955	-		+	1.68488	-0.419978	-3.11715	17.6024	17.3535	17.0706	17.0628	17.2119	16.8675	16.8295	16.8238	6.11e-06	3.26e-05	47355.3	17	18	16	20	19	13	14	15
C19orf53	Leydig cell tumor 10 kDa protein homolog	Q9UNZ5	Q9UNZ5	-		+	2.00657	-0.419144	-3.72022	15.8468	15.4834	15.5725	15.4681	15.6241	15.2887	14.9993	15.2515	0.00186	0.00101	10576.6	3	2	3	2	3	2	2	1
MAPK1	Mitogen-activated protein kinase 1	P28482	P28482	-		+	3.33508	-0.418872	-6.8876	18.598	18.8443	18.7037	18.7933	18.701	18.2513	18.355	18.3214	2.76e-06	3.26e-05	41389.7	12	12	12	12	12	12	12	12
FILIP1L	Filamin A-interacting protein 1-like;Isoform 2 of Filamin A-interacting protein 1-like;Isoform 3 of Filamin A-interacting protein 1-like;Isoform 7 of Filamin A-interacting protein 1-like	Q4L180;Q4L180-2;Q4L180-3;Q4L180-7	Q4L180;Q4L180-2;Q4L180-3;Q4L180-7	-			1.12614	-0.418681	-2.15304	16.1791	15.5643	15.3916	15.7207	15.5678	15.0663	15.4197	15.3121	0.000656	0.000429	130381.69;130381.69-2;130381.69-3;130381.69-7	7	7	5	4	6	2	3	4
HSPA1L	Heat shock 70 kDa protein 1-like	P34931	P34931	-			0.773287	-0.417911	-1.56533	18.3561	17.994	18.2751	17.6518	18.8041	17.9304	17.5922	17.8723	8.57e-05	8.59e-05	70375.1	3	3	2	4	2	4	5	3
SIRT2	NAD-dependent protein deacetylase sirtuin-2	Q8IXJ6	Q8IXJ6	-		+	2.30947	-0.417593	-4.33465	16.8315	16.7844	16.9921	16.6043	16.8416	16.4571	16.463	16.2594	0.000138	0.00012	43182.2	5	4	4	4	5	3	4	6
C11orf68	UPF0696 protein C11orf68	Q9H3H3	Q9H3H3	-		+	2.80381	-0.417517	-5.46102	17.5067	17.4951	17.4067	17.4057	17.2032	17.0293	17.0076	16.9209	4.4e-05	5.52e-05	31430.2	12	11	11	12	12	6	6	7
LAMTOR1	Ragulator complex protein LAMTOR1	Q6IAA8	Q6IAA8	-		+	2.40342	-0.417304	-4.53603	17.6166	17.7196	17.9245	17.9328	17.6607	17.4006	17.3718	17.2882	6.4e-05	6.96e-05	17744.8	7	7	6	7	7	5	6	6
UTRN	Utrophin	P46939	P46939	-		+	2.40475	-0.417074	-4.53891	16.5318	16.8276	16.7948	16.8665	16.5931	16.3597	16.2944	16.2629	1e-05	3.35e-05	394466	88	102	93	95	88	71	85	76
RIF1	Telomere-associated protein RIF1;Isoform 2 of Telomere-associated protein RIF1	Q5UIP0;Q5UIP0-2	Q5UIP0;Q5UIP0-2	-			0.491204	-0.416773	-1.18102	NaN	NaN	NaN	15.8363	16.761	15.9837	15.8823	15.7796	0.016	0.00656	274465.61;274465.61-2	NaN	NaN	NaN	1	1	2	2	2
PSMC6	26S proteasome regulatory subunit 10B	P62333	P62333	-		+	5.67459	-0.416719	-17.6615	18.5447	18.6156	18.6129	18.5516	18.6216	18.1602	18.1658	18.1917	1.25e-05	3.37e-05	44173	17	17	16	18	18	17	17	18
WARS1	Tryptophan--tRNA ligase, cytoplasmic	P23381	P23381	-			0.62389	-0.415955	-1.31116	17.5268	17.8855	18.8913	18.2308	17.751	17.6206	17.6754	17.6274	1.65e-05	3.55e-05	53165.4	17	17	19	17	18	18	20	18
COX15	Cytochrome c oxidase assembly protein COX15 homolog;Isoform 2 of Cytochrome c oxidase assembly protein COX15 homolog	Q7KZN9;Q7KZN9-2	Q7KZN9;Q7KZN9-2	+	CIV assembly factors;Complex IV;Heme synthesis and processing;Metabolism;Metals and cofactors;OXPHOS;OXPHOS assembly factors		0.505266	-0.415755	-1.10269	15.9096	14.4343	14.7768	15.3542	15.7228	14.9598	14.8377	14.6739	0.00104566	0.000625154	46030.2;46030.2-2	3	2	1	2	3	1	2	2
HDGF	Hepatoma-derived growth factor	P51858	P51858	-		+	4.14556	-0.415745	-9.63618	17.5042	17.5814	17.619	17.4516	17.5947	17.1606	17.1077	17.135	4.69e-05	5.71e-05	26788.3	17	18	16	18	17	12	12	12
NUCB1	Nucleobindin-1	Q02818	Q02818	-		+	2.28526	-0.415737	-4.28364	17.3755	17.5589	17.5024	17.5242	17.1892	17.0466	17.0779	16.9184	1.44e-05	3.47e-05	53879.3	24	25	25	24	24	19	22	20
METTL1	tRNA (guanine-N(7)-)-methyltransferase	Q9UBP6	Q9UBP6	-		+	2.15978	-0.415094	-4.02469	15.726	15.6196	15.3655	15.631	15.6793	15.3544	15.1192	15.094	0.00252	0.00125	31471	3	3	3	3	4	2	3	3
MAPRE2	Microtubule-associated protein RP/EB family member 2;Isoform 3 of Microtubule-associated protein RP/EB family member 2;Isoform 4 of Microtubule-associated protein RP/EB family member 2;Isoform 5 of Microtubule-associated protein RP/EB family member 2	Q15555;Q15555-3;Q15555-4;Q15555-5	Q15555;Q15555-3;Q15555-4;Q15555-5	-		+	1.3333	-0.414963	-2.50174	15.9541	15.9276	15.5823	16.304	15.9941	15.6596	15.3665	15.5863	0.00146	0.000824	37031.32;37031.32-3;37031.32-4;37031.32-5	6	5	2	3	6	1	3	3
POLR2L	DNA-directed RNA polymerases I, II, and III subunit RPABC5	P62875	P62875	-			0.995043	-0.41455	-2.0061	17.0802	16.8416	16.6927	16.4161	16.9964	NaN	16.508	16.2737	0.00311468	0.00138795	7645.11	1	1	1	1	1	NaN	1	2
ATG12	Ubiquitin-like protein ATG12	O94817	O94817	-		+	2.03438	-0.414231	-4.11277	14.06	NaN	14.1685	14.2228	14.318	13.7292	13.9584	13.6467	0.00295026	0.00134559	15113.2	2	NaN	1	2	1	1	2	1
CLIP1	Isoform 3 of CAP-Gly domain-containing linker protein 1	P30622-2	P30622-2	-		+	2.75388	-0.41343	-5.33931	16.4535	16.416	16.3844	16.6188	16.2604	16.0165	16.0224	16.0007	3.07e-05	4.62e-05	156781	43	42	34	42	40	27	31	27
RBPJ	Recombining binding protein suppressor of hairless;Isoform 4 of Recombining binding protein suppressor of hairless;Isoform 5 of Recombining binding protein suppressor of hairless;Isoform 6 of Recombining binding protein suppressor of hairless;Isoform 7 of Recombining binding protein suppressor of hairless	Q06330;Q06330-4;Q06330-5;Q06330-6;Q06330-7	Q06330;Q06330-4;Q06330-5;Q06330-6;Q06330-7	-			0.60259	-0.41325	-1.27427	16.9256	16.2535	15.6072	15.8864	16.6631	15.7681	15.8735	15.9201	0.000339	0.000249	55637.1;55637.1-4;55637.1-5;55637.1-6;55637.1-7	8	4	1	1	7	3	2	3
LPGAT1	Acyl-CoA:lysophosphatidylglycerol acyltransferase 1	Q92604	Q92604	-		+	1.71292	-0.413123	-3.16799	15.5513	15.891	16.0042	15.9842	16.0767	15.4582	15.6011	15.4057	0.00283	0.00133	43089.4	4	4	4	4	3	3	3	2
GCLM	Glutamate--cysteine ligase regulatory subunit	P48507	P48507	-		+	4.35876	-0.413027	-10.502	16.8762	16.7779	16.8839	16.7574	16.8633	16.3876	16.4645	16.4041	0.000169	0.000141	30727	7	5	7	6	6	5	5	5
FYTTD1	UAP56-interacting factor	Q96QD9	Q96QD9	-			1.05623	-0.412088	-2.03661	17.5218	17.4979	17.4327	17.465	16.7442	16.9023	17.037	16.8214	0.00297725	0.00134989	35818.3	3	4	2	2	1	4	3	3
HLCS	Biotin--protein ligase	P50747	P50747	-			0.785156	-0.411854	-1.58526	15.8741	16.0769	16.546	16.4562	16.9821	15.9506	15.9011	16.074	0.002987	0.00135264	80760	3	2	3	1	3	3	2	4
GYS1	Glycogen [starch] synthase, muscle	P13807	P13807	-		+	3.26979	-0.4117	-6.69828	17.4163	17.3245	17.138	17.276	17.2505	16.8564	16.858	16.8937	3.86e-05	5.12e-05	83785.5	15	13	13	12	16	12	12	10
ACY1	Aminoacylase-1	Q03154	Q03154	-			0.907122	-0.411371	-1.78888	16.1021	16.1452	16.9565	16.5483	16.0977	16.0597	15.9685	15.8475	0.000314717	0.000234684	45885	6	8	8	6	5	5	6	8
CCAR2	Cell cycle and apoptosis regulator protein 2	Q8N163	Q8N163	-		+	3.26632	-0.410788	-6.68835	17.1126	17.2203	17.135	17.0389	17.234	16.7279	16.8326	16.6517	2.93e-05	4.49e-05	102902	15	15	14	15	14	12	14	12
MPG	DNA-3-methyladenine glycosylase;Isoform 2 of DNA-3-methyladenine glycosylase;Isoform 3 of DNA-3-methyladenine glycosylase;Isoform 4 of DNA-3-methyladenine glycosylase	P29372;P29372-2;P29372-4;P29372-5	P29372;P29372-2;P29372-4;P29372-5	-		+	2.16113	-0.409739	-4.02743	16.8357	16.8618	16.4726	16.6737	16.838	16.2647	16.3322	16.3829	0.00188	0.00101	32868.65;32868.65-2;32868.65-4;32868.65-5	6	7	6	7	6	3	5	5
TUBB2B	Tubulin beta-2B chain	Q9BVA1	Q9BVA1	-		+	3.31536	-0.409608	-6.82999	20.1932	20.2585	20.1468	20.3777	20.2697	19.9197	19.7896	19.8095	2.37e-05	4.11e-05	49953.1	6	7	7	7	7	8	7	7
PREB	Prolactin regulatory element-binding protein	Q9HCU5	Q9HCU5	-		+	2.23886	-0.409573	-4.18684	16.4379	16.5951	16.6152	16.4986	16.6205	16.2462	16.2737	15.9117	0.000357807	0.00026129	45468.2	7	3	6	3	4	4	3	4
NEMP1	Nuclear envelope integral membrane protein 1	O14524	O14524	-			0.497398	-0.409434	-1.13942	14.6028	15.7389	NaN	15.4981	NaN	15.0167	14.9112	14.6837	0.00246644	0.00123322	50640	1	1	NaN	1	NaN	3	3	2
PANK4	4'-phosphopantetheine phosphatase	Q9NVE7	Q9NVE7	-		+	1.7528	-0.409114	-3.24083	16.1007	15.8965	16.1209	16.0591	15.6324	15.4889	15.641	15.5285	0.000884	0.000543	85990.9	12	12	10	11	8	9	10	9
ALDH9A1	4-trimethylaminobutyraldehyde dehydrogenase	P49189	P49189	+	Amino acid metabolism;Detoxification;GABA metabolism;Metabolism;ROS and glutathione metabolism		1.17546	-0.409031	-2.23545	17.7502	17.9132	18.3578	18.059	17.5601	17.5739	17.453	17.5301	3.37e-06	3.26e-05	53801.9	14	15	13	13	13	14	15	15
SHROOM3	Protein Shroom3	Q8TF72	Q8TF72	-			1.26839	-0.408484	-2.39168	15.6964	15.848	15.6405	15.8802	15.7572	15.7882	15.2013	15.0785	0.000184189	0.000150805	216857	2	3	4	3	6	1	2	2
CXorf38	Uncharacterized protein CXorf38	Q8TB03	Q8TB03	-			0.956454	-0.408081	-1.93663	17.2051	16.7116	17.2988	17.0249	17.2537	NaN	16.8987	16.4828	0.0128127	0.00530461	36669.9	7	5	4	4	5	NaN	1	3
FAM177A1	Protein FAM177A1;Isoform 2 of Protein FAM177A1	Q8N128;Q8N128-2	Q8N128;Q8N128-2	-		+	1.85541	-0.408062	-3.4312	16.568	16.1489	16.044	16.2229	16.2569	15.8923	15.829	15.799	0.000263979	0.000201932	23757.37;23757.37-2	3	3	2	3	3	1	2	2
CDK7	Cyclin-dependent kinase 7	P50613	P50613	-		+	3.07229	-0.407882	-6.15046	16.5925	16.4524	16.5232	16.5947	16.5155	16.0229	16.2771	16.0833	0.00263019	0.00127875	39038.4	3	3	2	4	3	3	4	3
STK39	STE20/SPS1-related proline-alanine-rich protein kinase;Isoform 2 of STE20/SPS1-related proline-alanine-rich protein kinase	Q9UEW8;Q9UEW8-2	Q9UEW8;Q9UEW8-2	-		+	1.31035	-0.407004	-2.46272	16.8658	16.3836	16.1735	16.2617	16.3253	15.9519	15.9416	16.0913	0.001394	0.000793472	59474.01;59474.01-2	8	7	7	7	8	7	5	6
TTC7A	Tetratricopeptide repeat protein 7A;Isoform 3 of Tetratricopeptide repeat protein 7A	Q9ULT0;Q9ULT0-4	Q9ULT0;Q9ULT0-4	-			0.180502	-0.406445	-0.486513	NaN	14.9117	14.2927	16.4482	NaN	14.6541	NaN	14.9681	0.0042244	0.00183057	96184.88;96184.88-4	NaN	1	2	2	NaN	1	NaN	1
CAMKK2	Calcium/calmodulin-dependent protein kinase kinase 2;Isoform 2 of Calcium/calmodulin-dependent protein kinase kinase 2;Isoform 3 of Calcium/calmodulin-dependent protein kinase kinase 2;Isoform 4 of Calcium/calmodulin-dependent protein kinase kinase 2;Isoform 5 of Calcium/calmodulin-dependent protein kinase kinase 2;Isoform 6 of Calcium/calmodulin-dependent protein kinase kinase 2;Isoform 7 of Cal…	Q96RR4;Q96RR4-2;Q96RR4-3;Q96RR4-4;Q96RR4-5;Q96RR4-6;Q96RR4-7	Q96RR4;Q96RR4-2;Q96RR4-3;Q96RR4-4;Q96RR4-5;Q96RR4-6;Q96RR4-7	-		+	2.15405	-0.406003	-4.01309	14.9859	15.09	15.2692	15.3732	15.1017	14.7054	14.8712	14.6974	0.00234	0.00119	64745.79;64745.79-2;64745.79-3;64745.79-4;64745.79-5;64745.79-6;64745.79-7	2	3	3	1	2	2	3	1
CC2D1B	Isoform 2 of Coiled-coil and C2 domain-containing protein 1B	Q5T0F9-2	Q5T0F9-2	-		+	1.37853	-0.405183	-2.57895	16.1121	15.7699	15.8085	15.8647	15.3919	15.4002	15.3102	15.4424	0.00044385	0.000312646	93594.7	10	6	4	7	6	6	4	4
SART1	U4/U6.U5 tri-snRNP-associated protein 1	O43290	O43290	-		+	3.67357	-0.403806	-7.94065	16.3758	16.3224	16.2069	16.2469	16.3235	15.9158	15.8082	15.9499	6.94e-05	7.33e-05	90254.8	16	14	14	13	16	10	11	15
AAMDC	Mth938 domain-containing protein	Q9H7C9	Q9H7C9	-			0.568856	-0.403758	-1.2154	16.8682	16.4604	16.0636	15.3783	16.3471	15.9009	15.827	15.7314	0.000139157	0.000121051	13332.2	5	6	4	5	5	4	5	4
OGA	Protein O-GlcNAcase;Isoform 4 of Protein O-GlcNAcase	O60502;O60502-4	O60502;O60502-4	-		+	2.36887	-0.402471	-4.46133	16.4767	16.4743	16.6332	16.4169	16.2173	16.0283	16.0738	16.0214	0.000278726	0.000211142	102915.11;102915.11-4	13	14	16	15	12	12	13	12
BAIAP2	Brain-specific angiogenesis inhibitor 1-associated protein 2;Isoform 2 of Brain-specific angiogenesis inhibitor 1-associated protein 2;Isoform 3 of Brain-specific angiogenesis inhibitor 1-associated protein 2;Isoform 4 of Brain-specific angiogenesis inhibitor 1-associated protein 2;Isoform 5 of Brain-specific angiogenesis inhibitor 1-associated protein 2;Isoform 6 of Brain-specific angiogenesis i…	Q9UQB8;Q9UQB8-2;Q9UQB8-3;Q9UQB8-4;Q9UQB8-5;Q9UQB8-6	Q9UQB8;Q9UQB8-2;Q9UQB8-3;Q9UQB8-4;Q9UQB8-5;Q9UQB8-6	-			0.631433	-0.401966	-1.32418	15.3979	15.7548	15.5828	16.4651	16.4754	15.4548	15.5039	15.641	0.000356	0.00026	60867.6;60867.6-2;60867.6-3;60867.6-4;60867.6-5;60867.6-6	2	7	4	10	7	4	5	4
NLRX1	NLR family member X1;Isoform 2 of NLR family member X1	Q86UT6;Q86UT6-2	Q86UT6;Q86UT6-2	+	Immune response;Signaling		0.51775	-0.401786	-1.12501	15.2066	14.5481	15.9144	15.5814	15.0954	14.6752	15.3582	14.5687	0.0013	0.00075	107615.95;107615.95-2	2	1	2	3	2	2	2	2
ANXA3	Annexin A3	P12429	P12429	-			0.780855	-0.401299	-1.57804	16.3021	17.0124	16.5568	17.4125	16.866	16.4262	16.4425	16.4174	0.00101719	0.000610059	36375.3	2	5	2	6	5	5	4	4
FBXW8	F-box/WD repeat-containing protein 8	Q8N3Y1	Q8N3Y1	-		+	1.91865	-0.400975	-3.55082	15.548	15.8987	16.0302	15.8703	15.9373	15.4912	15.3762	15.5004	0.00198426	0.00106154	67393.9	3	3	3	4	4	3	4	4
PCBD1	Pterin-4-alpha-carbinolamine dehydratase	P61457	P61457	-			0.418933	-0.400907	-0.960043	17.0623	15.876	17.2836	17.016	16.6885	16.2598	16.509	NaN	7.48e-05	7.75e-05	11999.6	2	3	4	2	4	1	1	NaN
SRSF3	Serine/arginine-rich splicing factor 3;Isoform 2 of Serine/arginine-rich splicing factor 3	P84103;P84103-2	P84103;P84103-2	-		+	3.25396	-0.400848	-6.65301	19.5788	19.4601	19.3666	19.3801	19.5169	19.1098	18.9866	19.0825	3.14e-05	4.67e-05	19329.59;19329.59-2	6	6	6	6	6	6	6	6
RTCA	RNA 3'-terminal phosphate cyclase;Isoform 2 of RNA 3'-terminal phosphate cyclase	O00442;O00442-2	O00442;O00442-2	-		+	4.31572	-0.399947	-10.3217	18.137	18.0615	18.2197	18.1279	18.1566	17.6905	17.7752	17.756	0.000226305	0.000177981	39336.73;39336.73-2	7	8	8	8	8	7	7	8
RBM15	RNA-binding protein 15;Isoform 2 of RNA-binding protein 15;Isoform 3 of RNA-binding protein 15;Isoform 4 of RNA-binding protein 15	Q96T37;Q96T37-2;Q96T37-3;Q96T37-4	Q96T37;Q96T37-2;Q96T37-3;Q96T37-4	-			1.05903	-0.399514	-2.04128	14.5407	14.9792	14.9839	14.9946	15.2187	14.1907	14.7075	14.7335	0.0134	0.00552	107188.6;107188.6-2;107188.6-3;107188.6-4	2	2	3	2	3	2	3	2
EFHD2	EF-hand domain-containing protein D2	Q96C19	Q96C19	-			0.786998	-0.398941	-1.58835	18.1547	17.4833	17.5211	16.9684	17.5783	17.1392	17.1409	17.1467	8.39e-05	8.46e-05	26697.3	10	10	9	10	10	10	10	10
STX16	Isoform D of Syntaxin-16	O14662-4	O14662-4	-			1.10201	-0.39869	-2.1128	16.7698	16.8671	17.156	16.9002	16.7193	16.8215	16.5546	16.0753	0.00206121	0.00109345	35299.3	5	4	5	5	5	3	4	5
ZGPAT	Zinc finger CCCH-type with G patch domain-containing protein;Isoform 2 of Zinc finger CCCH-type with G patch domain-containing protein;Isoform 3 of Zinc finger CCCH-type with G patch domain-containing protein	Q8N5A5;Q8N5A5-2;Q8N5A5-3	Q8N5A5;Q8N5A5-2;Q8N5A5-3	-			0.69923	-0.398404	-1.4402	15.6692	14.6324	15.3565	15.3244	15.3489	15.2495	14.8501	14.504	0.0023146	0.00118132	57358.68;57358.68-2;57358.68-3	3	2	1	3	3	1	3	1
NUP133	Nuclear pore complex protein Nup133	Q8WUM0	Q8WUM0	-		+	3.24096	-0.396597	-6.61602	16.5405	16.3499	16.406	16.3419	16.3477	15.9119	16.0333	16.0565	1.07e-05	3.35e-05	128979	19	19	15	16	16	15	17	16
CHURC1	Protein Churchill;Isoform 2 of Protein Churchill	Q8WUH1;Q8WUH1-2	Q8WUH1;Q8WUH1-2	-		+	2.46576	-0.396482	-4.67274	16.549	16.4794	16.4907	16.1889	16.3767	16.0304	16.0304	16.0006	0.00253	0.00125	16111.45;16111.45-2	2	2	2	2	2	2	1	1
ARSB	Arylsulfatase B	P15848	P15848	-			0.670177	-0.395281	-1.39068	16.4538	16.7155	17.7116	17.0257	17.1271	16.5904	16.5669	16.677	4.24e-05	5.4e-05	59687.2	8	7	8	7	8	6	6	7
NIT2	Omega-amidase NIT2	Q9NQR4	Q9NQR4	+	Detoxification;Metabolism	+	2.22567	-0.39489	-4.15953	17.3847	17.3158	17.6292	17.2152	17.307	17.0202	16.9462	16.96	2.87e-05	4.46e-05	30608	17	15	15	16	15	15	16	15
COMT	Catechol O-methyltransferase;Isoform Soluble of Catechol O-methyltransferase	P21964;P21964-2	P21964;P21964-2	+	Amino acid metabolism;Catechol metabolism;Metabolism	+	1.30798	-0.394041	-2.4587	18.493	18.5668	18.7559	18.8831	18.2289	18.0671	18.3314	18.176	2.78e-05	4.42e-05	30037.05;30037.05-2	14	14	14	14	13	12	13	13
ADAM15	Disintegrin and metalloproteinase domain-containing protein 15;Isoform 10 of Disintegrin and metalloproteinase domain-containing protein 15;Isoform 12 of Disintegrin and metalloproteinase domain-containing protein 15;Isoform 13 of Disintegrin and metalloproteinase domain-containing protein 15;Isoform 2 of Disintegrin and metalloproteinase domain-containing protein 15;Isoform 3 of Disintegrin and …	Q13444;Q13444-10;Q13444-12;Q13444-13;Q13444-2;Q13444-3;Q13444-4;Q13444-5;Q13444-6;Q13444-7;Q13444-8;Q13444-9	Q13444;Q13444-10;Q13444-12;Q13444-13;Q13444-2;Q13444-3;Q13444-4;Q13444-5;Q13444-6;Q13444-7;Q13444-8;Q13444-9	-		+	1.54412	-0.394019	-2.86623	15.7765	15.7699	15.494	16.0593	15.5905	15.3922	15.2149	15.425	0.00237379	0.00119997	92959.23;92959.23-10;92959.23-12;92959.23-13;92959.23-2;92959.23-3;92959.23-4;92959.23-5;92959.23-6;92959.23-7;92959.23-8;92959.23-9	2	2	2	2	2	2	2	2
NAA25	N-alpha-acetyltransferase 25, NatB auxiliary subunit	Q14CX7	Q14CX7	-		+	2.40983	-0.393831	-4.54997	16.7104	16.5366	16.6094	16.4261	16.7039	16.1612	16.3349	16.1143	0.000422	0.0003	112292	9	11	9	7	9	8	10	11
WASH3P;WASH2P	Putative WAS protein family homolog 3;WAS protein family homolog 2	C4AMC7;Q6VEQ5	C4AMC7;Q6VEQ5			+	1.60656	-0.393605	-2.97669	17.0611	16.7173	17.2013	17.1597	17.1846	16.5354	16.683	16.7952	1.49e-05	3.47e-05	49994.54;50312.01	10	8	9	6	7	7	6	7
TRIM33	E3 ubiquitin-protein ligase TRIM33	Q9UPN9	Q9UPN9	-		+	2.14634	-0.393441	-5.06822	16.3195	16.4442	NaN	NaN	16.5039	16.1189	15.9278	16.0405	0.00207112	0.00109677	122533	2	2	NaN	NaN	3	1	3	1
CC2D1A	Coiled-coil and C2 domain-containing protein 1A	Q6P1N0	Q6P1N0	-		+	1.73631	-0.393328	-3.21064	16.8354	16.7365	17.0547	17.0337	16.6127	16.5378	16.336	16.51	0.00191237	0.00102919	104062	9	11	13	13	14	7	8	7
SLK	STE20-like serine/threonine-protein kinase;Isoform 2 of STE20-like serine/threonine-protein kinase	Q9H2G2;Q9H2G2-2	Q9H2G2;Q9H2G2-2	-		+	4.04011	-0.393081	-9.23207	16.2166	16.2966	16.1624	16.2353	16.3059	15.9149	15.8233	15.8127	4.82e-05	5.81e-05	142694.92;142694.92-2	23	21	23	22	23	14	20	18
ZFYVE21	Zinc finger FYVE domain-containing protein 21;Isoform 2 of Zinc finger FYVE domain-containing protein 21	Q9BQ24;Q9BQ24-2	Q9BQ24;Q9BQ24-2	-		+	2.13569	-0.392963	-3.97599	16.5036	16.5336	16.1537	16.3251	16.3955	16.092	15.9182	15.9578	0.000584	0.000389	26505.64;26505.64-2	2	1	1	1	1	1	1	1
SH3GLB2	Endophilin-B2	Q9NR46	Q9NR46	-		+	2.31013	-0.391553	-4.33604	16.5575	16.6983	16.4239	16.3866	16.3823	16.0117	16.087	16.1958	6.39e-05	6.95e-05	43973.9	9	9	9	10	11	9	8	8
RAB11FIP5	Rab11 family-interacting protein 5	Q9BXF6	Q9BXF6	mito-interacting			0.985175	-0.390772	-1.91856	17.1439	16.614	16.3501	16.2989	16.7273	16.2229	16.2911	16.1942	6.83e-05	7.26e-05	70415.1	20	17	16	9	20	10	11	11
NOL6	Nucleolar protein 6;Isoform 4 of Nucleolar protein 6	Q9H6R4;Q9H6R4-4	Q9H6R4;Q9H6R4-4	-		+	2.52427	-0.389996	-4.80339	16.1953	16.0848	16.1018	16.2185	16.2014	15.5856	15.924	15.8015	0.00172637	0.000946733	127593.04;127593.04-4	6	5	7	6	6	7	7	9
VWA8	von Willebrand factor A domain-containing protein 8;Isoform 3 of von Willebrand factor A domain-containing protein 8	A3KMH1;A3KMH1-3	A3KMH1;A3KMH1-3	+	0		0.979778	-0.389915	-1.9096	15.9792	15.1962	15.7788	15.6492	15.2736	15.245	15.0585	15.2529	0.000372559	0.000270071	214824.45;214824.45-3	10	4	4	5	4	6	5	8
SLAIN2	SLAIN motif-containing protein 2	Q9P270	Q9P270	-			0.408589	-0.389609	-0.940137	16.5441	16.2052	16.1401	15.6741	16.2381	NaN	15.1247	16.4166	0.000339626	0.000250071	62543.4	7	6	7	2	6	NaN	1	1
MT-ND5	NADH-ubiquinone oxidoreductase chain 5	P03915	P03915	+	CI subunits;Complex I;OXPHOS;OXPHOS subunits	+	4.12074	-0.389171	-9.53966	16.44	16.4505	16.5785	16.5319	16.4559	16.0527	16.1385	16.1154	0.000333193	0.000246264	67026.5	3	3	2	3	3	2	2	3
STOML2	Stomatin-like protein 2, mitochondrial	Q9UJZ1	Q9UJZ1	+	Protein import, sorting and homeostasis;Protein homeostasis	+	2.96573	-0.388927	-5.86955	17.0174	17.1076	17.289	17.07	17.0722	16.7817	16.7075	16.6778	3.37e-05	4.81e-05	38534.1	14	15	14	13	14	12	11	11
HNRNPA3	Isoform 2 of Heterogeneous nuclear ribonucleoprotein A3	P51991-2	P51991-2	-		+	1.66432	-0.388419	-3.08006	16.8619	16.5962	16.5248	16.3924	16.8198	16.1329	16.3044	16.3145	9.93e-05	9.5e-05	37029.1	2	2	2	2	2	2	2	2
PNO1	RNA-binding protein PNO1	Q9NRX1	Q9NRX1	-		+	1.67969	-0.388028	-3.10778	16.4956	16.2258	16.0639	16.5394	16.3615	15.8927	16.0695	15.8855	0.000492573	0.000340207	27924.3	4	6	7	5	7	5	6	6
WDR91	WD repeat-containing protein 91;Isoform 2 of WD repeat-containing protein 91	A4D1P6;A4D1P6-2	A4D1P6;A4D1P6-2	-			0.944317	-0.386516	-1.91483	NaN	15.658	15.9144	15.7972	15.3016	15.1757	15.5798	15.0884	0.00283159	0.00132671	83344.4;83344.4-2	NaN	3	1	2	2	1	1	1
RTRAF	RNA transcription, translation and transport factor protein	Q9Y224	Q9Y224	-			1.19303	-0.386253	-2.26488	17.2125	17.609	17.3334	17.3387	16.9007	16.8357	17.0933	16.7488	8.53e-05	8.57e-05	28068.1	11	11	12	11	10	9	10	8
NDUFA4	Cytochrome c oxidase subunit NDUFA4	O00483	O00483	+	CIV subunits;Complex IV;OXPHOS;OXPHOS subunits	+	3.29187	-0.386158	-6.76182	17.7118	17.8528	17.8816	17.7601	17.7536	17.4856	17.3089	17.4229	0.000310502	0.000232207	9369.86	3	2	3	3	3	3	3	3
GOLGA3	Golgin subfamily A member 3	Q08378	Q08378	-		+	3.41939	-0.385636	-7.13843	16.2677	16.102	16.2953	16.2578	16.1407	15.8753	15.8006	15.8053	2.79e-05	4.42e-05	167355	37	36	39	42	38	32	33	33
UROS	Uroporphyrinogen-III synthase	P10746	P10746	-			1.11169	-0.385435	-2.21799	15.663	15.3315	15.9826	15.6913	15.6147	15.2903	15.252	NaN	0.00232945	0.00118421	28627.7	4	5	3	3	4	1	2	NaN
DCTD	Isoform 2 of Deoxycytidylate deaminase	P32321-2	P32321-2	-		+	2.47637	-0.384591	-4.69625	17.5025	17.4396	17.6853	17.4667	17.309	17.1172	17.1085	17.0624	1.37e-05	3.43e-05	21014.1	9	8	10	8	8	8	8	7
OGDH	2-oxoglutarate dehydrogenase, mitochondrial	Q02218	Q02218	+	Carbohydrate metabolism;Metabolism;TCA cycle	+	3.02355	-0.384462	-6.02075	16.8718	16.7665	16.8445	16.7028	16.9026	16.349	16.5407	16.4099	1.4e-05	3.44e-05	115935	35	33	34	34	33	32	32	32
SARM1	NAD(+) hydrolase SARM1	Q6SZW1	Q6SZW1	mito-interacting		+	1.48493	-0.3842	-2.92719	15.7784	NaN	15.8162	16.0592	15.589	15.4016	15.5708	15.3071	0.00287	0.00133	79388.2	3	NaN	7	5	3	4	4	3
H2BC11;H2BC17;H2BC3;H2BC21;H2BU1	Histone H2B type 1-J;Histone H2B type 1-O;Histone H2B type 1-B;Histone H2B type 2-E;Histone H2B type 3-B	P06899;P23527;P33778;Q16778;Q8N257	P06899;P23527;P33778;Q16778;Q8N257	-		+	2.21598	-0.384038	-4.13955	21.6426	21.4562	21.5147	21.301	21.5234	21.1392	20.9571	21.2144	1.19e-05	3.36e-05	13904.16;13906.13;13908.11;13920.16;13950.19	2	2	2	2	2	2	2	2
IPO13	Importin-13	O94829	O94829	-		+	2.30107	-0.383403	-4.3169	15.3006	15.4831	15.4843	15.1828	15.3335	15.0788	14.9752	14.8663	0.000181128	0.000148872	108195	6	9	10	9	8	5	5	4
DNAJB6	DnaJ homolog subfamily B member 6	O75190	O75190	-		+	1.45367	-0.383321	-2.70836	17.1921	17.0338	16.6864	16.7788	17.1451	16.4736	16.6943	16.5838	0.000149925	0.000128319	36087	4	3	2	3	4	2	4	3
PPP5C	Serine/threonine-protein phosphatase 5	P53041	P53041	-		+	2.88605	-0.383211	-5.66585	16.8729	17.0529	17.0717	17.0564	17.1213	16.7535	16.5936	16.6084	8.19e-06	3.33e-05	56878.6	12	12	13	10	12	10	8	10
CPNE8	Copine-8	Q86YQ8	Q86YQ8	-			0.405571	-0.383004	-0.956392	NaN	16.5223	15.1779	15.8736	NaN	15.4435	15.3223	15.6589	0.00311237	0.00138749	63107.6	NaN	2	1	1	NaN	1	2	1
RNF214	RING finger protein 214;Isoform 2 of RING finger protein 214	Q8ND24;Q8ND24-2	Q8ND24;Q8ND24-2	-		+	1.70689	-0.382579	-3.15704	15.186	15.3151	14.9362	15.2687	15.2294	15.0313	14.7014	14.6807	0.00304428	0.0013673	77667.36;77667.36-2	5	4	4	4	3	1	4	3
ITPA	Inosine triphosphate pyrophosphatase	Q9BY32	Q9BY32	-			0.783239	-0.381781	-1.58204	16.4526	16.9536	17.3926	17.1132	17.4434	16.7673	16.5958	16.7048	4.65e-05	5.68e-05	21445.7	3	4	5	4	4	2	4	3
ARPC4	Actin-related protein 2/3 complex subunit 4;Isoform 3 of Actin-related protein 2/3 complex subunit 4	P59998;P59998-3	P59998;P59998-3	-		+	6.05999	-0.381693	-20.5208	19.4395	19.4312	19.492	19.4321	19.4505	19.0381	19.0875	19.0765	8.19e-06	3.33e-05	19667.01;19667.01-3	6	6	6	6	7	6	6	6
RCN2	Reticulocalbin-2;Isoform 2 of Reticulocalbin-2	Q14257;Q14257-2	Q14257;Q14257-2	-		+	2.24679	-0.381673	-4.20329	16.92	16.9683	16.913	16.5976	16.7828	16.418	16.49	16.456	5.17e-05	6.04e-05	36876.44;36876.44-2	10	9	9	8	8	7	7	7
AKAP8L	A-kinase anchor protein 8-like	Q9ULX6	Q9ULX6	-		+	3.07591	-0.381487	-6.16018	16.4074	16.3091	16.3928	16.2501	16.2787	15.8707	16.0711	15.8966	0.00233	0.00118	71639.7	3	4	3	3	4	3	4	3
RIOX1	Ribosomal oxygenase 1	Q9H6W3	Q9H6W3	-		+	1.66723	-0.381284	-3.08532	16.1581	16.2708	15.9296	15.8295	16.1004	15.7862	15.5033	15.7397	0.00262466	0.00127727	71085.7	2	2	3	1	2	1	3	1
FBXO6	F-box only protein 6	Q9NRD1	Q9NRD1	-			1.12557	-0.380402	-2.15207	14.3319	14.9028	14.8985	14.9929	14.4969	14.2637	14.3547	14.4141	0.000287024	0.000216656	33932.6	1	1	1	1	2	1	1	1
PDCD1LG2	Programmed cell death 1 ligand 2	Q9BQ51	Q9BQ51	-		+	2.38538	-0.380223	-4.99641	16.5844	16.451	NaN	16.3576	16.3461	16.019	15.9973	16.1474	0.00284	0.00133	30956.9	2	3	NaN	2	3	2	3	2
LAMTOR3	Ragulator complex protein LAMTOR3;Isoform 2 of Ragulator complex protein LAMTOR3	Q9UHA4;Q9UHA4-2	Q9UHA4;Q9UHA4-2	-		+	1.37765	-0.378856	-2.57745	18.2439	18.3409	18.8021	18.6698	18.3325	18.0935	18.0452	18.1582	6.24e-06	3.3e-05	13622.73;13622.73-2	4	3	4	4	3	3	4	4
HUWE1	E3 ubiquitin-protein ligase HUWE1;Isoform 2 of E3 ubiquitin-protein ligase HUWE1;Isoform 3 of E3 ubiquitin-protein ligase HUWE1	Q7Z6Z7;Q7Z6Z7-2;Q7Z6Z7-3	Q7Z6Z7;Q7Z6Z7-2;Q7Z6Z7-3	-		+	3.36734	-0.378327	-6.98271	16.7728	16.8347	17.0183	16.8703	16.8629	16.4794	16.4992	16.5018	5.75e-06	3.26e-05	481890.61;481890.61-2;481890.61-3	48	62	63	54	60	46	55	55
CCND1	G1/S-specific cyclin-D1	P24385	P24385	-			0.402234	-0.378045	-0.913785	17.981	17.4395	16.1414	16.9828	17.4976	16.8543	16.7932	16.8438	5.67e-05	6.45e-05	33729.1	9	6	3	7	6	5	6	6
CALD1	Caldesmon;Isoform 2 of Caldesmon;Isoform 6 of Caldesmon	Q05682;Q05682-2;Q05682-6	Q05682;Q05682-2;Q05682-6	-			1.0552	-0.377602	-2.0349	17.8885	18.4108	18.5581	18.6982	18.3354	18.0709	17.9302	18.0007	4.89e-06	3.26e-05	93231.08;93231.08-2;93231.08-6	32	35	38	38	40	32	32	32
MSI2	RNA-binding protein Musashi homolog 2;Isoform 2 of RNA-binding protein Musashi homolog 2	Q96DH6;Q96DH6-2	Q96DH6;Q96DH6-2	-			0.149006	-0.377136	-0.394369	16.8359	14.2559	14.4722	16.6918	16.5243	15.4064	15.3513	NaN	0.012166	0.00504761	35196.69;35196.69-2	4	2	2	2	1	1	1	NaN
EIF5B	Eukaryotic translation initiation factor 5B	O60841	O60841	-		+	3.7024	-0.37671	-8.0362	16.9403	16.8722	16.9973	17.0504	16.9325	16.5589	16.5408	16.6458	3.43e-05	4.84e-05	138827	32	33	32	30	31	26	26	29
CARNMT1	Carnosine N-methyltransferase	Q8N4J0	Q8N4J0	-			0.498776	-0.376266	-1.09104	16.0752	15.437	15.0274	14.8129	15.4402	15.2486	14.4632	15.235	0.000504783	0.000347	47185.7	4	3	2	1	3	2	2	3
PLCD3	1-phosphatidylinositol 4,5-bisphosphate phosphodiesterase delta-3	Q8N3E9	Q8N3E9	-			0.60759	-0.37592	-1.28295	14.8243	15.7087	15.7535	15.8516	15.5103	15.3104	14.7251	15.4258	0.00201342	0.00107199	89258.4	2	6	4	4	5	1	2	1
EIF3F	Eukaryotic translation initiation factor 3 subunit F	O00303	O00303	-		+	2.15098	-0.375673	-4.00686	18.7997	18.788	18.5003	18.6742	18.6706	18.1961	18.4705	18.2661	2.57e-05	4.26e-05	37563.8	13	13	12	12	12	12	13	12
NUDT3	Diphosphoinositol polyphosphate phosphohydrolase 1	O95989	O95989	-		+	1.76954	-0.375586	-3.27159	17.5847	17.5399	17.2644	17.5565	17.2988	17.2379	17.0708	16.911	0.00158802	0.000882026	19471	2	2	1	1	1	2	1	2
PRKCD	Protein kinase C delta type;Isoform 2 of Protein kinase C delta type	Q05655;Q05655-2	Q05655;Q05655-2	mito-interacting			1.14258	-0.374815	-2.18048	16.6648	16.3962	16.1984	16.1593	16.0314	16.1391	15.7224	15.8841	0.00292815	0.00134114	77505.04;77505.04-2	7	8	5	8	6	1	3	3
P4HA2	Isoform IIa of Prolyl 4-hydroxylase subunit alpha-2	O15460-2	O15460-2	-			1.06951	-0.374679	-2.0587	18.6003	19.0275	19.3048	19.3474	18.9215	18.66	18.6835	18.6533	3.35e-06	3.26e-05	60632.7	23	24	25	25	23	25	24	25
FBLN1	Fibulin-1	P23142	P23142	-			0.404502	-0.374341	-0.918046	16.3752	15.9541	16.4002	14.7234	15.8347	15.5612	15.4069	15.4814	0.000122016	0.000109603	77214.1	10	7	11	4	8	4	7	7
SMC5	Structural maintenance of chromosomes protein 5	Q8IY18	Q8IY18	-			0.632378	-0.372933	-1.32581	15.9546	16.8987	16.6646	16.5879	15.8209	16.0365	16.0363	15.9644	0.00248569	0.00123808	128806	1	1	1	1	1	1	1	2
PDAP1	28 kDa heat- and acid-stable phosphoprotein	Q13442	Q13442	-		+	2.64771	-0.371431	-5.08674	18.6823	18.6806	18.7767	18.4664	18.6734	18.3225	18.3188	18.212	2.11e-05	3.88e-05	20630	6	5	5	5	5	4	4	4
RFTN1	Raftlin	Q14699	Q14699	-		+	1.42193	-0.371333	-2.65352	16.737	16.1747	16.5687	16.2548	16.4673	16.1466	16.0067	16.0542	0.000182	0.00015	63145.6	11	10	13	11	12	7	8	9
ATG3	Ubiquitin-like-conjugating enzyme ATG3	Q9NT62	Q9NT62	-		+	2.9283	-0.370998	-5.77319	17.4103	17.3787	17.3602	17.4649	17.4959	16.9617	17.199	16.9923	6.61e-05	7.1e-05	35864.4	9	8	9	9	9	8	8	8
STAM2	Signal transducing adapter molecule 2	O75886	O75886	-		+	2.76022	-0.370904	-5.35465	16.5614	16.4373	16.3752	16.2815	16.4375	16.1377	15.997	16.0084	0.000167	0.00014	58164.2	10	10	9	8	9	7	9	7
CHUK	Inhibitor of nuclear factor kappa-B kinase subunit alpha	O15111	O15111	-		+	1.90277	-0.370837	-3.52062	15.7283	15.8377	15.595	15.7595	15.5058	15.1286	15.4394	15.3752	0.000567	0.000381	84639.6	7	6	3	4	5	4	5	4
TAOK2	Isoform 2 of Serine/threonine-protein kinase TAO2	Q9UL54-2	Q9UL54-2	-		+	1.3129	-0.370676	-2.59314	15.9206	15.6538	15.9806	16.0946	16.1263	NaN	15.5368	15.6323	0.00370811	0.00161793	119281	3	4	4	4	3	NaN	4	3
EXOC8	Exocyst complex component 8	Q8IYI6	Q8IYI6	-		+	2.9454	-0.370405	-5.81707	16.2041	16.065	16.0859	16.2372	16.0757	15.6729	15.869	15.7476	0.000528091	0.000359748	81799.1	13	10	12	9	12	7	8	12
RFC3	Replication factor C subunit 3;Isoform 2 of Replication factor C subunit 3	P40938;P40938-2	P40938;P40938-2	-		+	1.69565	-0.370401	-3.13665	15.3934	15.4571	15.3498	15.2889	15.329	15.2981	14.8204	14.8612	0.00057933	0.000387324	40556.28;40556.28-2	4	4	3	3	3	3	3	3
STXBP1	Syntaxin-binding protein 1	P61764	P61764	-		+	2.75751	-0.369714	-5.34809	16.9873	16.8791	16.6811	16.8292	16.7878	16.4212	16.4798	16.4885	4.19e-05	5.36e-05	67568.7	21	19	18	17	18	18	18	14
GRAMD2B	GRAM domain-containing protein 2B	Q96HH9	Q96HH9	-			0.59792	-0.369708	-1.26615	16.0904	14.9554	16.1444	15.9094	15.5975	15.4134	15.3996	15.2961	0.00108	0.000644	47869.2	4	4	5	5	3	3	1	2
RPTOR	Regulatory-associated protein of mTOR	Q8N122	Q8N122	-		+	2.23026	-0.369512	-4.16903	16.2442	16.223	16.1475	16.2233	15.8878	15.7854	15.7684	15.7732	0.00113819	0.000671037	149038	4	5	6	9	7	7	7	6
INPP1	Inositol polyphosphate 1-phosphatase	P49441	P49441	-		+	1.62236	-0.369323	-3.00485	16.425	16.502	16.8176	16.8772	16.6112	16.3114	16.3454	16.1751	0.00217295	0.00113296	43998	2	3	2	4	3	2	3	4
UBE2Z	Ubiquitin-conjugating enzyme E2 Z	Q9H832	Q9H832	-		+	3.47506	-0.3691	-7.30808	16.8953	16.9683	16.9592	16.7999	16.9145	16.475	16.6176	16.5224	0.000218	0.000173	38210.2	11	11	10	11	9	10	10	11
CRYL1	Lambda-crystallin homolog;Isoform 2 of Lambda-crystallin homolog	Q9Y2S2;Q9Y2S2-2	Q9Y2S2;Q9Y2S2-2	-		+	1.572	-0.369092	-2.91539	17.1116	16.7036	16.8829	16.6181	16.7275	16.3008	16.5189	16.4992	4.87e-05	5.86e-05	35419.19;35419.19-2	2	3	2	2	3	1	2	2
XPC	DNA repair protein complementing XP-C cells;Isoform 2 of DNA repair protein complementing XP-C cells	Q01831;Q01831-2	Q01831;Q01831-2	-		+	1.43836	-0.3689	-2.68188	15.9605	15.7848	16.2654	16.1432	15.8454	15.666	15.7688	15.4581	0.00231367	0.00118132	105952.69;105952.69-2	4	6	5	4	3	5	5	3
MADD	Isoform 2 of MAP kinase-activating death domain protein;Isoform 3 of MAP kinase-activating death domain protein;Isoform 4 of MAP kinase-activating death domain protein;Isoform 5 of MAP kinase-activating death domain protein;Isoform 6 of MAP kinase-activating death domain protein;Isoform 8 of MAP kinase-activating death domain protein	Q8WXG6-2;Q8WXG6-3;Q8WXG6-4;Q8WXG6-5;Q8WXG6-6;Q8WXG6-8	Q8WXG6-2;Q8WXG6-3;Q8WXG6-4;Q8WXG6-5;Q8WXG6-6;Q8WXG6-8	-			0.538231	-0.368616	-1.18413	15.2764	15.2743	NaN	15.7313	15.5174	14.4153	15.516	15.3123	0.00214569	0.00112378	164005.7;171005.71;171392.16;173395.41;176455.48;178557.86	2	3	NaN	3	3	2	4	2
CHCHD3	MICOS complex subunit MIC19	Q9NX63	Q9NX63	+	Cristae formation;Intramitochondrial membrane interactions;MICOS complex;Mitochondrial dynamics and surveillance	+	4.73467	-0.368255	-12.2036	15.8753	15.9288	15.9234	15.8746	15.9205	15.5957	15.538	15.475	0.000195968	0.000158071	26152.4	8	8	6	8	8	4	7	7
NDUFB4	NADH dehydrogenase [ubiquinone] 1 beta subcomplex subunit 4;Isoform 2 of NADH dehydrogenase [ubiquinone] 1 beta subcomplex subunit 4	O95168;O95168-2	O95168;O95168-2	+	CI subunits;Complex I;OXPHOS;OXPHOS subunits	+	2.33906	-0.367721	-4.39748	18.1557	18.2123	18.4531	18.3238	18.1991	17.8515	17.8333	18.0185	0.000663	0.000433	15208.59;15208.59-2	3	4	4	4	4	3	3	2
LRRC14	Leucine-rich repeat-containing protein 14	Q15048	Q15048	-		+	1.73121	-0.367683	-3.20132	14.7493	14.775	14.7662	14.7122	14.6603	14.1757	14.2523	14.6667	0.000434	0.000307	54513.3	2	2	1	1	1	1	1	1
PSAT1	Phosphoserine aminotransferase	Q9Y617	Q9Y617	-			0.236466	-0.36712	-0.584563	17.6398	18.2722	20.0295	19.7732	18.2061	18.3801	18.4226	18.4485	3.24e-06	3.26e-05	40422.7	16	18	20	19	17	18	19	18
IL6ST	Interleukin-6 receptor subunit beta	P40189	P40189	-			0.368662	-0.36684	-0.850075	17.3699	16.5431	16.3533	15.3896	16.6631	16.1652	16.2286	15.8971	4.45e-05	5.55e-05	103537	9	5	4	3	7	7	6	8
QSOX2	Sulfhydryl oxidase 2	Q6ZRP7	Q6ZRP7	-		+	1.90784	-0.366153	-3.53024	16.183	16.0662	15.96	16.2399	16.0377	15.5388	15.9123	15.7425	0.00112019	0.000662768	77528.7	5	6	5	6	5	6	5	6
IFI35	Interferon-induced 35 kDa protein;Isoform 2 of Interferon-induced 35 kDa protein	P80217;P80217-2	P80217;P80217-2	-			1.03482	-0.365773	-2.00103	17.0543	17.2102	17.4962	16.6698	16.9527	16.72	16.6898	16.7227	0.000171424	0.000142356	31546.4;31546.4-2	5	4	5	5	5	4	5	4
CAMK2D	Calcium/calmodulin-dependent protein kinase type II subunit delta;Isoform Delta 10 of Calcium/calmodulin-dependent protein kinase type II subunit delta;Isoform Delta 11 of Calcium/calmodulin-dependent protein kinase type II subunit delta;Isoform Delta 9 of Calcium/calmodulin-dependent protein kinase type II subunit delta;Isoform Delta 6 of Calcium/calmodulin-dependent protein kinase type II subun…	Q13557;Q13557-10;Q13557-11;Q13557-6;Q13557-8	Q13557;Q13557-10;Q13557-11;Q13557-6;Q13557-8	-		+	2.05795	-0.365679	-3.82096	18.3572	18.2005	17.9389	18.0325	18.1496	17.7592	17.7792	17.7718	2.32e-05	4.08e-05	56369.4;56369.4-10;56369.4-11;56369.4-6;56369.4-8	14	14	13	14	14	13	13	13
CLPX	ATP-dependent Clp protease ATP-binding subunit clpX-like, mitochondrial	O76031	O76031	+	Protein import, sorting and homeostasis;Proteases;Protein homeostasis	+	2.68564	-0.365474	-5.176	16.9317	16.8898	16.7958	16.7382	16.869	16.4019	16.6258	16.4106	0.00127394	0.000736237	69223.7	7	6	5	6	9	5	4	7
BET1	BET1 homolog	O15155	O15155	-			1.10589	-0.364755	-2.11926	16.3664	15.8387	16.5005	15.9929	16.1162	15.6491	15.8081	15.9373	2.69e-05	4.34e-05	13289.4	2	2	2	2	2	2	2	2
GNA12	Guanine nucleotide-binding protein subunit alpha-12	Q03113	Q03113	-		+	1.84883	-0.364707	-3.41887	15.7039	15.5074	15.4203	15.4663	15.253	15.0556	15.2268	15.034	0.00109853	0.000652261	44279.2	2	3	3	2	2	3	2	2
COG5	Conserved oligomeric Golgi complex subunit 5;Isoform 2 of Conserved oligomeric Golgi complex subunit 5	Q9UP83;Q9UP83-2	Q9UP83;Q9UP83-2	-		+	2.88653	-0.364572	-5.66705	16.4845	16.6617	16.6442	16.7245	16.6221	16.3444	16.2731	16.1709	0.000185	0.000151	92742.86;92742.86-2	9	12	11	9	9	10	10	9
BNIP1	Vesicle transport protein SEC20	Q12981	Q12981	-		+	2.50502	-0.364003	-4.76015	16.8161	17.0887	16.9471	16.9284	16.9987	16.6647	16.4606	16.6501	0.00144607	0.000817342	26132.4	3	3	4	4	5	2	2	2
NBAS	Neuroblastoma-amplified sequence	A2RRP1	A2RRP1	-		+	2.98121	-0.363903	-5.90974	16.1587	16.2933	16.2829	16.2423	16.2584	15.7541	16.0037	15.8919	8.28e-05	8.38e-05	268571	22	23	26	20	21	22	21	20
GPX1	Glutathione peroxidase 1	P07203	P07203	+	Detoxification;Metabolism;ROS and glutathione metabolism;Selenoproteins	+	1.42961	-0.363515	-2.66677	17.9012	18.1692	18.3061	18.3455	17.8543	17.7091	17.7795	17.7666	1.99e-05	3.77e-05	22088.2	6	7	8	8	7	6	6	7
GBP2	Guanylate-binding protein 2	P32456	P32456	-			0.508115	-0.363473	-1.10779	17.1973	15.9605	16.3378	15.7932	16.4862	16.012	16.0596	15.9029	0.000541176	0.000366633	67209	4	4	4	3	4	3	4	4
AGPAT2	1-acyl-sn-glycerol-3-phosphate acyltransferase beta	O15120	O15120	-			0.843652	-0.36312	-1.73463	17.7622	17.6035	17.8214	17.1711	17.5438	NaN	17.0554	17.3792	0.00963891	0.00405156	30914.3	1	1	1	2	1	NaN	2	1
COL12A1	Collagen alpha-1(XII) chain	Q99715	Q99715	-			0.390664	-0.361546	-0.891966	18.4288	19.0425	20.1864	19.2417	18.6604	18.7783	18.7225	18.7504	2.95e-06	3.26e-05	333147	103	108	117	106	103	99	100	99
MICAL3	[F-actin]-monooxygenase MICAL3	Q7RTP6	Q7RTP6	-		+	1.79468	-0.361492	-3.318	15.8857	16.0337	15.7116	15.9681	15.8415	15.3109	15.5972	15.6718	0.00306281	0.00137272	224295	6	10	7	8	8	8	7	7
STAT3	Signal transducer and activator of transcription 3;Isoform 3 of Signal transducer and activator of transcription 3	P40763;P40763-3	P40763;P40763-3	mito-interacting		+	1.67766	-0.361088	-3.10412	16.923	16.5986	16.8661	16.4504	16.7542	16.3835	16.3386	16.35	0.000111813	0.00010306	88067.79;88067.79-3	22	21	23	23	24	16	20	22
MEST	Mesoderm-specific transcript homolog protein;Isoform 2 of Mesoderm-specific transcript homolog protein;Isoform 3 of Mesoderm-specific transcript homolog protein	Q5EB52;Q5EB52-2;Q5EB52-3	Q5EB52;Q5EB52-2;Q5EB52-3	-			1.26333	-0.361062	-3.07065	NaN	NaN	NaN	15.9515	16.1848	15.5964	15.8082	15.7166	0.00743	0.00316	38830.08;38830.08-2;38830.08-3	NaN	NaN	NaN	2	2	2	2	2
DBN1	Drebrin;Isoform 3 of Drebrin	Q16643;Q16643-3	Q16643;Q16643-3	-			1.0084	-0.361035	-1.95712	18.6694	18.2875	18.2351	17.806	18.3007	17.8739	17.9617	17.8606	1.41e-05	3.45e-05	71429.29;71429.29-3	17	15	15	15	17	14	15	15
NUP62	Nuclear pore glycoprotein p62	P37198	P37198	-			0.905535	-0.360804	-1.78624	16.2803	16.1503	15.8813	15.4413	16.0135	15.4844	15.7578	15.5354	0.000307445	0.000230337	53254.9	9	8	7	7	8	6	8	7
HEATR5B	HEAT repeat-containing protein 5B;Isoform 3 of HEAT repeat-containing protein 5B	Q9P2D3;Q9P2D3-3	Q9P2D3;Q9P2D3-3	-		+	1.38357	-0.360307	-2.58758	15.6004	15.0383	15.5074	15.5089	15.4908	14.9976	15.1824	15.0266	0.00297271	0.00134943	224302.39;224302.39-3	5	8	6	4	7	4	5	4
EML1	Echinoderm microtubule-associated protein-like 1;Isoform 3 of Echinoderm microtubule-associated protein-like 1	O00423;O00423-3	O00423;O00423-3	-			0.952606	-0.360254	-1.86447	15.9407	16.4801	16.3618	16.7362	16.3249	16.2216	16	15.8039	0.003118	0.00138815	89860.89;89860.89-3	2	3	2	3	4	2	3	3
DNAJA2	DnaJ homolog subfamily A member 2	O60884	O60884	-		+	3.46352	-0.360002	-7.27266	17.3556	17.3368	17.1494	17.2637	17.2546	16.8903	16.9117	16.934	3.64e-05	4.99e-05	45745.6	13	13	12	12	11	7	7	7
TRAPPC5	Trafficking protein particle complex subunit 5	Q8IUR0	Q8IUR0	-		+	1.79987	-0.35963	-3.32761	16.6336	16.623	16.3038	16.5279	16.7219	16.2472	16.2943	16.0656	0.000117	0.000107	20783	6	4	4	5	3	5	4	6
NLE1	Notchless protein homolog 1	Q9NVX2	Q9NVX2	-			0.286394	-0.35907	-0.688027	16.7185	14.9313	15.3172	16.6111	16.6911	15.7632	15.4413	15.8797	0.0118141	0.00491117	53320.3	1	2	2	1	1	2	1	2
FUCA2	Plasma alpha-L-fucosidase	Q9BTY2	Q9BTY2	-			0.443607	-0.35882	-1.00718	15.8276	17.2272	NaN	16.6022	16.6652	16.4267	16.2461	15.9924	0.00229599	0.00117511	54066.7	1	3	NaN	4	3	3	4	4
FADD	FAS-associated death domain protein	Q13158	Q13158	-			0.876701	-0.358763	-2.04948	NaN	15.5431	15.5752	15.1533	NaN	15.0658	15.0644	NaN	0.00348601	0.00152701	23279.3	NaN	1	1	1	NaN	2	1	NaN
OPLAH	5-oxoprolinase	O14841	O14841	-			0.713878	-0.358587	-1.50263	NaN	16.0435	16.7793	16.5213	15.9221	15.9223	15.977	15.9746	0.000933	0.000568	137457	NaN	7	15	13	10	8	7	13
NDUFB8	NADH dehydrogenase [ubiquinone] 1 beta subcomplex subunit 8, mitochondrial;Isoform 2 of NADH dehydrogenase [ubiquinone] 1 beta subcomplex subunit 8, mitochondrial;Isoform 3 of NADH dehydrogenase [ubiquinone] 1 beta subcomplex subunit 8, mitochondrial	O95169;O95169-2;O95169-3	O95169;O95169-2;O95169-3	+	CI subunits;Complex I;OXPHOS;OXPHOS subunits		0.85364	-0.35824	-1.69982	17.1506	16.6383	17.3249	17.2836	16.7136	16.5498	16.8958	16.5462	0.00283	0.00133	21765.74;21765.74-2;21765.74-3	2	2	2	1	1	2	1	1
AP4M1	AP-4 complex subunit mu-1	O00189	O00189	-		+	1.76792	-0.35715	-3.26861	16.4707	16.5293	16.6045	16.562	16.2145	16.1182	15.9795	16.2593	0.00297	0.00135	49977	4	4	2	3	2	2	3	2
TRIM22	E3 ubiquitin-protein ligase TRIM22	Q8IYM9	Q8IYM9	-			0.916805	-0.357109	-1.80498	15.9752	16.8363	16.5875	16.2702	16.3133	16.0265	16.1159	15.9758	0.000439353	0.000309851	56947.2	6	7	6	8	5	4	5	4
ZMYND11	Zinc finger MYND domain-containing protein 11;Isoform 2 of Zinc finger MYND domain-containing protein 11;Isoform 3 of Zinc finger MYND domain-containing protein 11;Isoform 4 of Zinc finger MYND domain-containing protein 11;Isoform 5 of Zinc finger MYND domain-containing protein 11;Isoform 6 of Zinc finger MYND domain-containing protein 11	Q15326;Q15326-2;Q15326-3;Q15326-4;Q15326-5;Q15326-6	Q15326;Q15326-2;Q15326-3;Q15326-4;Q15326-5;Q15326-6	-			1.0862	-0.356989	-2.08647	15.2914	15.2875	14.8705	15.1689	15.6045	14.9867	14.9711	14.7051	0.00238	0.0012	70962.87;70962.87-2;70962.87-3;70962.87-4;70962.87-5;70962.87-6	2	1	2	2	2	1	1	1
SDHD	Succinate dehydrogenase [ubiquinone] cytochrome b small subunit, mitochondrial;Isoform 2 of Succinate dehydrogenase [ubiquinone] cytochrome b small subunit, mitochondrial	O14521;O14521-2	O14521;O14521-2	+	Carbohydrate metabolism;CII subunits;Complex II;Heme-containing proteins;Metabolism;Metals and cofactors;OXPHOS;OXPHOS subunits;TCA cycle		0.366489	-0.356817	-0.858098	15.5672	14.6709	14.6182	NaN	16.0495	14.8973	14.9222	14.7894	0.0032	0.00142	17043;17043-2	2	2	2	NaN	1	1	1	2
RAD21	Double-strand-break repair protein rad21 homolog	O60216	O60216	-		+	2.36833	-0.356372	-4.46018	15.4551	15.4461	15.4969	15.656	15.574	15.3314	15.0669	15.1093	0.0001914	0.000155014	71689.5	4	5	3	3	6	3	2	3
KANK1	KN motif and ankyrin repeat domain-containing protein 1;Isoform 2 of KN motif and ankyrin repeat domain-containing protein 1	Q14678;Q14678-2	Q14678;Q14678-2	-			0.385599	-0.355658	-0.88237	15.3597	15.4385	14.4381	14.9087	14.5451	13.836	14.6738	15.2373	0.00270628	0.00129963	147289.09;147289.09-2	2	2	2	3	3	2	4	2
DDX24	ATP-dependent RNA helicase DDX24;Isoform 2 of ATP-dependent RNA helicase DDX24	Q9GZR7;Q9GZR7-2	Q9GZR7;Q9GZR7-2	-		+	1.89038	-0.355409	-3.49714	15.8266	15.809	15.5818	15.8489	16.0519	15.4237	15.4606	15.5204	0.00115	0.000678	96331.77;96331.77-2	5	7	5	7	4	5	4	6
ATP6V0D1	V-type proton ATPase subunit d 1	P61421	P61421	-		+	2.69472	-0.355318	-5.19752	17.6797	17.7706	17.6456	17.7349	17.5398	17.2048	17.4	17.3516	8.71e-05	8.68e-05	40329.1	6	5	7	8	5	5	7	7
RBM4	RNA-binding protein 4	Q9BWF3	Q9BWF3	-		+	1.76816	-0.355067	-3.26905	16.7474	16.6887	16.5729	16.5033	16.9153	16.2273	16.2975	16.4665	1.13e-05	3.36e-05	40313.8	12	10	10	9	10	8	6	5
PDE12	2',5'-phosphodiesterase 12;Isoform 2 of 2',5'-phosphodiesterase 12	Q6L8Q7;Q6L8Q7-2	Q6L8Q7;Q6L8Q7-2	+	Mitochondrial central dogma;mt-mRNA modifications;mtRNA metabolism;mtRNA stability and decay	+	2.87783	-0.35463	-5.64512	16.8701	16.7844	16.6807	16.6957	16.8939	16.4105	16.4943	16.3861	7.44e-05	7.73e-05	67351.52;67351.52-2	11	11	12	10	11	10	10	9
SAMD9	Sterile alpha motif domain-containing protein 9	Q5K651	Q5K651	-			0.443332	-0.354397	-0.990222	15.1727	15.8068	16.2072	15.9846	14.81	15.3895	15.0224	15.3138	0.00203	0.00108	184281	2	3	6	7	3	5	3	3
ZC3HC1	Nuclear-interacting partner of ALK	Q86WB0	Q86WB0	-		+	2.22738	-0.354372	-4.16308	16.0335	16.0167	16.1296	15.9061	16.0548	15.7185	15.8134	15.4895	0.00827	0.0035	55261.5	4	5	1	2	5	2	4	2
DNM1L	Isoform 3 of Dynamin-1-like protein	O00429-4	O00429-4	+	Fission;Mitochondrial dynamics and surveillance	+	4.49428	-0.353922	-11.0885	17.1643	17.1784	17.1951	17.1785	17.2794	16.802	16.8584	16.8752	7.55e-06	3.32e-05	78100	32	32	28	31	32	28	27	30
RAC1	Ras-related C3 botulinum toxin substrate 1;Isoform B of Ras-related C3 botulinum toxin substrate 1	P63000;P63000-2	P63000;P63000-2	-		+	3.92223	-0.353922	-8.79814	19.2058	19.2017	19.0908	19.1752	19.0967	18.8599	18.7613	18.7792	7.64e-06	3.32e-05	21450.1;21450.1-2	9	9	9	9	9	9	9	9
MRI1	Methylthioribose-1-phosphate isomerase	Q9BV20	Q9BV20	-			0.611781	-0.35385	-1.29021	15.6526	16.1983	15.0095	15.8528	15.4063	15.1154	15.3815	15.3132	0.000177295	0.000146428	39149.8	6	6	4	6	5	4	5	4
SUMO1	Small ubiquitin-related modifier 1	P63165	P63165	-			1.28329	-0.353722	-2.41687	16.4202	16.247	16.2098	15.9303	16.3011	15.6062	16.0574	15.9402	0.000388843	0.000279709	11557	3	3	3	3	3	3	3	3
ARHGAP1	Rho GTPase-activating protein 1	Q07960	Q07960	-		+	2.87312	-0.353629	-5.63329	18.3609	18.2532	18.5213	18.3329	18.4479	18.0214	18.011	18.0565	3.21e-06	3.26e-05	50435.8	20	21	21	21	20	19	22	19
RRP8	Ribosomal RNA-processing protein 8	O43159	O43159	-			1.24868	-0.353416	-2.35843	16.4222	16.1027	16.3669	15.9803	16.5058	16.0004	16.0306	15.7355	0.000519	0.000355	50714.8	2	2	2	2	2	2	3	2
FKBP3	Peptidyl-prolyl cis-trans isomerase FKBP3	Q00688	Q00688	-		+	3.6872	-0.353271	-7.98571	17.2068	17.3648	17.3545	17.3087	17.2734	16.9284	16.9094	17.0073	5.35e-05	6.17e-05	25176.8	11	10	12	11	11	11	11	11
GALK1	Galactokinase;Isoform 2 of Galactokinase	P51570;P51570-2	P51570;P51570-2	-		+	2.53321	-0.352361	-4.82353	17.3557	17.4165	17.6479	17.3804	17.3762	17.1143	17.0762	17.0583	0.000118	0.000107	42272.23;42272.23-2	11	10	12	12	12	6	6	6
PTPN12	Tyrosine-protein phosphatase non-receptor type 12	Q05209	Q05209	-		+	2.05211	-0.35227	-3.80945	16.9484	16.9066	16.8888	16.5949	16.7839	16.5386	16.5063	16.3719	2.52e-05	4.23e-05	88106.4	13	10	12	13	11	8	9	8
GSPT2	Eukaryotic peptide chain release factor GTP-binding subunit ERF3B	Q8IYD1	Q8IYD1	-		+	2.35777	-0.352202	-4.4375	17.0816	17.194	17.0184	16.844	17.0544	16.6858	16.6302	16.7428	0.001785	0.000973864	68883.2	4	3	6	5	6	5	5	5
PPP1R12C	Protein phosphatase 1 regulatory subunit 12C	Q9BZL4	Q9BZL4	-		+	3.18097	-0.352193	-6.44738	16.2089	16.2288	16.2048	16.1508	16.1754	15.9262	15.8968	15.7016	0.000883	0.000542	84881.2	17	17	13	10	15	4	4	4
IMPA1	Inositol monophosphatase 1;Isoform 3 of Inositol monophosphatase 1	P29218;P29218-3	P29218;P29218-3	-		+	2.66999	-0.35196	-5.13904	16.9573	16.7989	16.7188	16.8074	16.9014	16.5321	16.5463	16.376	3.82e-05	5.09e-05	30188.8;30188.8-3	10	10	9	9	10	6	7	9
TRMT2A	tRNA (uracil-5-)-methyltransferase homolog A;Isoform 2 of tRNA (uracil-5-)-methyltransferase homolog A	Q8IZ69;Q8IZ69-2	Q8IZ69;Q8IZ69-2	-		+	2.78615	-0.351795	-5.41777	15.8606	16.0981	16.0175	15.9386	15.9591	15.6099	15.7177	15.5414	0.00271	0.0013	68725.57;68725.57-2	3	2	2	1	3	1	1	1
TRAPPC12	Trafficking protein particle complex subunit 12	Q8WVT3	Q8WVT3	-		+	1.89669	-0.351747	-3.50908	16.0797	16.3424	16.335	16.1718	16.1497	15.8763	16.0278	15.6879	0.000140171	0.000121526	79375.1	5	6	5	6	5	3	5	7
SCRN1	Secernin-1;Isoform 2 of Secernin-1	Q12765;Q12765-2	Q12765;Q12765-2	-		+	1.80934	-0.351402	-3.34519	18.2346	18.054	17.8883	17.7986	17.876	17.6031	17.5967	17.6569	8.73e-05	8.69e-05	46382.05;46382.05-2	18	18	18	18	18	17	18	18
EML3	Echinoderm microtubule-associated protein-like 3	Q32P44	Q32P44	-		+	2.04983	-0.351351	-3.80495	16.2001	16.0724	16.3848	15.9754	16.1756	15.7831	15.8054	15.8424	0.00156	0.000868	95196.8	9	9	8	7	7	3	5	6
PPM1F	Protein phosphatase 1F	P49593	P49593	-		+	2.92402	-0.351138	-5.76225	17.535	17.4597	17.388	17.2653	17.4414	17.0893	17.0759	17.035	0.000161	0.000136	49830.8	12	10	11	11	12	8	10	7
SMS	Spermine synthase	P52788	P52788	-			1.17446	-0.351124	-2.23377	17.3983	16.9854	16.9362	16.6648	16.993	16.6821	16.6432	16.608	3.41e-05	4.84e-05	41268.2	19	16	16	14	16	12	14	15
SPATS2L	SPATS2-like protein	Q9NUQ6	Q9NUQ6	-		+	2.18516	-0.351052	-4.07635	16.8046	16.5555	16.4961	16.6715	16.733	16.3669	16.3491	16.1873	0.000686	0.000443	61729	18	14	12	15	16	13	13	14
TSC22D1	TSC22 domain family protein 1;Isoform 4 of TSC22 domain family protein 1	Q15714;Q15714-4	Q15714;Q15714-4	-			0.909871	-0.350713	-1.94925	16.3229	15.8208	15.8145	NaN	15.9411	NaN	15.6457	15.6026	0.00134571	0.000770672	109676.56;109676.56-4	2	2	1	NaN	2	NaN	2	1
CDR2L	Cerebellar degeneration-related protein 2-like	Q86X02	Q86X02	-		+	1.72105	-0.350307	-3.1828	16.5647	16.2276	16.3896	16.4702	16.5306	15.8821	16.161	16.2157	0.000139792	0.000121333	53010.4	5	4	3	5	4	3	4	3
SLC31A1	High affinity copper uptake protein 1	O15431	O15431	-		+	2.09207	-0.350301	-6.29725	NaN	NaN	15.2919	15.2015	NaN	14.8697	14.855	14.9645	0.00278672	0.00132	21090.6	NaN	NaN	2	1	NaN	1	1	1
TKFC	Triokinase/FMN cyclase	Q3LXA3	Q3LXA3	-		+	1.38595	-0.349528	-2.59167	16.1055	16.2668	16.5408	16.3302	16.0936	15.736	16.1086	15.909	0.000206	0.000165	58947.1	10	8	10	10	9	7	4	8
QPCTL	Glutaminyl-peptide cyclotransferase-like protein	Q9NXS2	Q9NXS2	-		+	1.5271	-0.349205	-2.83632	16.3082	16.5557	16.612	16.7212	16.309	16.2583	16.1876	16.0101	0.000695409	0.000448528	42924.1	3	2	1	4	2	5	2	2
ERMP1	Endoplasmic reticulum metallopeptidase 1	Q7Z2K6	Q7Z2K6	-		+	2.62582	-0.349033	-5.03571	15.991	15.8202	15.6835	15.7937	15.8362	15.5353	15.4516	15.4408	0.000471	0.000328	100231	7	5	4	6	9	2	4	4
VPS51	Vacuolar protein sorting-associated protein 51 homolog	Q9UID3	Q9UID3	-		+	2.39668	-0.348719	-4.52139	16.5391	16.4132	16.4353	16.6501	16.4127	16.2519	16.1394	16.0328	0.000179	0.000147	86042.3	10	8	8	10	9	7	7	6
BOLA2	BolA-like protein 2	Q9H3K6	Q9H3K6			+	3.11096	-0.348577	-6.25488	17.4909	17.3987	17.4075	17.37	17.2368	17.0563	17.0152	17.025	0.000225261	0.000177458	10116.5	3	4	2	2	2	3	3	3
KLHL11	Kelch-like protein 11	Q9NVR0	Q9NVR0	-			0.668836	-0.348332	-1.42172	14.7645	15.3961	NaN	14.6249	14.8829	14.4254	14.9092	14.3718	0.0096566	0.00405827	80148.1	1	1	NaN	2	2	1	2	3
ABCD4	Lysosomal cobalamin transporter ABCD4	O14678	O14678	-			0.671962	-0.347803	-1.57727	NaN	NaN	NaN	15.6794	15.929	15.4911	15.1725	15.7056	0.00389173	0.00169268	68597.4	NaN	NaN	NaN	2	1	1	3	2
TECPR2	Tectonin beta-propeller repeat-containing protein 2;Isoform 2 of Tectonin beta-propeller repeat-containing protein 2	O15040;O15040-2	O15040;O15040-2	-			0.388637	-0.347394	-0.958176	15.1812	NaN	NaN	NaN	16.0964	15.4807	15.1783	15.2152	0.0054166	0.00233251	153848.29;153848.29-2	1	NaN	NaN	NaN	1	2	1	3
COMMD9	COMM domain-containing protein 9;Isoform 2 of COMM domain-containing protein 9	Q9P000;Q9P000-2	Q9P000;Q9P000-2	-		+	1.42287	-0.347113	-2.65514	15.6861	15.7252	15.6096	15.6485	15.3256	15.0413	15.4687	15.2457	0.00207	0.0011	21819.13;21819.13-2	3	7	5	5	4	2	2	3
RUFY1	RUN and FYVE domain-containing protein 1	Q96T51	Q96T51	-		+	1.88102	-0.347099	-3.47943	16.028	16.2883	16.1337	16.0211	15.8991	15.5956	15.8165	15.7687	0.000561	0.000378	79817.9	15	15	14	16	14	11	15	14
RASA4B;RASA4;RASA4	Ras GTPase-activating protein 4B;Ras GTPase-activating protein 4;Isoform 2 of Ras GTPase-activating protein 4	C9J798;O43374;O43374-2	C9J798;O43374;O43374-2	-			0.901756	-0.346927	-2.10985	NaN	NaN	17.2421	17.5783	17.2715	16.8987	NaN	17.1354	0.0127	0.00525	90406.48;90457.58;90457.58-2	NaN	NaN	1	1	1	1	NaN	2
GYG1	Glycogenin-1;Isoform GN-1 of Glycogenin-1	P46976;P46976-2	P46976;P46976-2	-		+	1.3236	-0.346855	-2.48522	17.7824	17.4403	17.2177	17.2917	17.2668	17.0541	16.9869	17.1178	9.28e-06	3.34e-05	39383.77;39383.77-2	8	7	5	6	7	7	9	7
SAFB2	Scaffold attachment factor B2	Q14151	Q14151	-		+	1.7208	-0.346713	-3.18234	15.4612	15.6333	15.3426	15.4089	15.185	14.9488	15.0532	15.1765	0.00107	0.00064	107473	5	4	5	5	6	5	3	7
ACE	Angiotensin-converting enzyme;Isoform Somatic-2 of Angiotensin-converting enzyme	P12821;P12821-2	P12821;P12821-2	-			0.78939	-0.346273	-2.16829	NaN	NaN	14.6233	NaN	14.3147	NaN	14.0815	14.164	0.0029456	0.00134492	149714.85;149714.85-2	NaN	NaN	2	NaN	1	NaN	1	1
GOSR1	Golgi SNAP receptor complex member 1	O95249	O95249	-		+	2.63335	-0.346182	-5.05321	17.5696	17.4892	17.6263	17.5173	17.4066	17.0707	17.2942	17.162	0.000182339	0.00014971	28612.6	4	4	4	2	4	4	5	4
SEC24A	Protein transport protein Sec24A	O95486	O95486	-		+	2.68122	-0.345944	-5.16555	17.0087	16.9845	17.0131	17.1249	17.0857	16.6576	16.8478	16.5868	2.22e-05	3.97e-05	119749	15	20	16	19	19	13	13	13
FKBP10	Peptidyl-prolyl cis-trans isomerase FKBP10	Q96AY3	Q96AY3	+	Protein import, sorting and homeostasis;Chaperones;Protein homeostasis		0.694224	-0.345935	-1.43168	18.316	18.8612	19.1972	19.349	18.7634	18.5842	18.49	18.58	3.29e-06	3.26e-05	64245	25	24	25	24	25	22	23	21
SF3B6	Splicing factor 3B subunit 6	Q9Y3B4	Q9Y3B4	-		+	2.09033	-0.3453	-3.88515	17.5673	17.5461	17.3711	17.3867	17.7345	17.1775	17.1777	17.1724	0.000375328	0.000271657	14584.9	5	5	3	5	3	4	4	4
DYNLRB1	Dynein light chain roadblock-type 1	Q9NP97	Q9NP97	-		+	1.47601	-0.344311	-2.74713	18.923	19.0685	18.713	18.6573	18.8152	18.2916	18.6537	18.5279	3.77e-05	5.07e-05	10921.6	5	5	5	5	5	4	5	5
SRSF9	Serine/arginine-rich splicing factor 9	Q13242	Q13242	-		+	1.87565	-0.344152	-3.4693	17.6818	17.6523	17.4137	17.4522	17.7431	17.1593	17.3707	17.2034	1.12e-05	3.36e-05	25542.2	7	7	6	6	8	5	4	5
ERLIN2	Erlin-2	O94905	O94905	-		+	3.62688	-0.343949	-7.78788	17.5992	17.617	17.5287	17.6427	17.6684	17.2586	17.1989	17.3443	1.3e-05	3.39e-05	37839.5	18	18	16	19	18	17	17	17
USP16	Ubiquitin carboxyl-terminal hydrolase 16;Isoform 2 of Ubiquitin carboxyl-terminal hydrolase 16;Isoform 3 of Ubiquitin carboxyl-terminal hydrolase 16	Q9Y5T5;Q9Y5T5-2;Q9Y5T5-3	Q9Y5T5;Q9Y5T5-2;Q9Y5T5-3	-		+	1.96595	-0.343808	-3.64148	15.7794	15.9319	15.8246	15.823	15.7775	15.2878	15.4648	15.6978	0.0024962	0.00124121	93570.14;93570.14-2;93570.14-3	3	2	4	2	2	4	2	2
DTNBP1	Dysbindin;Isoform 2 of Dysbindin	Q96EV8;Q96EV8-2	Q96EV8;Q96EV8-2	-			0.942143	-0.343731	-1.84709	15.0858	15.6143	15.8289	15.6182	15.2618	15.2539	15.142	15.0183	0.00293126	0.00134114	39492.97;39492.97-2	2	2	3	2	1	1	3	1
UQCC2	Ubiquinol-cytochrome-c reductase complex assembly factor 2	Q9BRT2	Q9BRT2	+	CIII assembly factors;Complex III;OXPHOS;OXPHOS assembly factors		0.964922	-0.343712	-1.88493	15.9007	15.6756	15.7611	15.2484	15.2976	15.0722	15.3345	15.2921	0.00256097	0.00125819	14874.8	2	2	1	1	1	1	2	2
PAWR	PRKC apoptosis WT1 regulator protein	Q96IZ0	Q96IZ0	-			0.904884	-0.343539	-1.78516	16.7174	16.8271	17.5099	16.8482	16.9459	16.7034	16.4965	16.6786	2.02e-05	3.8e-05	36567.5	9	8	11	9	10	7	6	8
SNX18	Isoform 2 of Sorting nexin-18	Q96RF0-2	Q96RF0-2	-			1.11612	-0.343422	-2.13632	16.9553	16.5558	17.0795	16.4501	16.7309	16.49	16.4079	16.3349	5.79e-05	6.53e-05	69006.5	12	11	13	11	13	8	9	9
USP15	Ubiquitin carboxyl-terminal hydrolase 15;Isoform 2 of Ubiquitin carboxyl-terminal hydrolase 15;Isoform 3 of Ubiquitin carboxyl-terminal hydrolase 15	Q9Y4E8;Q9Y4E8-2;Q9Y4E8-3	Q9Y4E8;Q9Y4E8-2;Q9Y4E8-3	-		+	3.472	-0.3431	-7.2987	16.078	16.0754	15.9871	16.0846	16.1244	15.6942	15.6621	15.8241	3.66e-05	4.99e-05	112419.07;112419.07-2;112419.07-3	23	21	19	19	20	14	18	17
LDB1	LIM domain-binding protein 1;Isoform 3 of LIM domain-binding protein 1;Isoform 2 of LIM domain-binding protein 1	Q86U70;Q86U70-2;Q86U70-3	Q86U70;Q86U70-2;Q86U70-3	-			1.24362	-0.342555	-2.3499	16.0112	16.6031	16.2303	16.2774	16.2411	15.9939	16.0603	15.736	0.0182	0.00739	46532.59;46532.59-2;46532.59-3	1	1	1	2	1	3	2	2
THOC2	THO complex subunit 2	Q8NI27	Q8NI27	-		+	1.64526	-0.34237	-3.04583	15.6574	15.5802	15.4771	15.3545	15.7501	15.0501	15.3458	15.2685	7.61e-05	7.86e-05	182775	8	7	6	5	8	6	9	9
MBOAT2	Lysophospholipid acyltransferase 2	Q6ZWT7	Q6ZWT7	-			0.477423	-0.342074	-1.05249	16.7339	15.552	16.3476	15.5865	16.4512	15.9509	15.7675	15.6581	0.000345111	0.000253551	59526.8	3	1	2	2	3	1	2	2
CYC1	Cytochrome c1, heme protein, mitochondrial	P08574	P08574	+	CIII subunits;Complex III;Cytochromes;Electron carriers;Heme-containing proteins;Metabolism;Metals and cofactors;OXPHOS;OXPHOS subunits	+	2.44645	-0.341568	-4.63011	17.1545	17.2766	17.056	17.328	17.235	16.8471	16.9651	16.7932	0.000187	0.000152	35422	9	8	9	9	9	9	9	9
HSP90AB4P	Putative heat shock protein HSP 90-beta 4	Q58FF6	Q58FF6				1.02481	-0.341446	-1.98439	17.7567	17.6741	17.4885	17.4949	17.3355	17.2284	16.8657	17.5313	0.00216	0.00113	58264.4	3	4	4	3	3	4	2	3
DHX57	Putative ATP-dependent RNA helicase DHX57	Q6P158	Q6P158	-		+	1.83135	-0.341316	-3.38617	16.8208	16.5957	16.4649	16.5083	16.6593	16.1144	16.3348	16.3563	0.000109	0.000101	155604	8	9	6	8	8	9	9	9
VPS16	Vacuolar protein sorting-associated protein 16 homolog	Q9H269	Q9H269	-		+	4.04036	-0.341253	-9.23301	16.7292	16.779	16.8449	16.78	16.7752	16.4047	16.4006	16.5159	0.000359	0.000262	94693.7	10	11	11	12	9	9	14	14
SMAP	Small acidic protein	O00193	O00193	-			0.446437	-0.341134	-0.995934	16.2982	15.5661	15.7636	15.0815	16.0837	15.898	15.3788	14.9757	0.00211	0.00111	20332.5	4	2	2	1	3	1	3	2
PDCD10	Programmed cell death protein 10	Q9BUL8	Q9BUL8	-		+	5.7146	-0.341099	-17.9394	17.2926	17.2551	17.2611	17.2091	17.2721	16.9155	16.9062	16.929	0.000715	0.000458	24701.6	8	9	9	9	9	6	7	6
ARHGAP12	Rho GTPase-activating protein 12;Isoform 2 of Rho GTPase-activating protein 12;Isoform 4 of Rho GTPase-activating protein 12	Q8IWW6;Q8IWW6-2;Q8IWW6-4	Q8IWW6;Q8IWW6-2;Q8IWW6-4	-		+	1.57514	-0.340785	-2.92094	14.956	15.2505	14.8834	14.8374	15.0552	14.8143	14.6386	14.5144	0.000272862	0.000207506	96254.43;96254.43-2;96254.43-4	8	5	5	3	4	5	5	3
RBBP5	Retinoblastoma-binding protein 5;Isoform 2 of Retinoblastoma-binding protein 5	Q15291;Q15291-2	Q15291;Q15291-2	-			0.329929	-0.340536	-0.774931	15.6507	17.3441	15.5162	15.9934	15.8574	15.7331	15.8193	15.6432	0.0028829	0.00133373	59152.62;59152.62-2	3	1	2	2	4	3	4	4
SCFD2	Sec1 family domain-containing protein 2;Isoform 2 of Sec1 family domain-containing protein 2	Q8WU76;Q8WU76-2	Q8WU76;Q8WU76-2	-		+	3.22061	-0.340327	-6.55844	16.7178	16.8146	16.7205	16.613	16.6158	16.3499	16.3889	16.3292	0.000603	0.0004	75127.14;75127.14-2	4	5	5	9	4	4	5	6
LRPAP1	Alpha-2-macroglobulin receptor-associated protein	P30533	P30533	-		+	1.71309	-0.340091	-3.1683	17.1037	17.4735	17.0103	17.2642	17.2614	16.896	16.9202	16.8314	8.77e-06	3.33e-05	41466	16	15	14	15	17	16	16	15
CTIF	CBP80/20-dependent translation initiation factor;Isoform 2 of CBP80/20-dependent translation initiation factor	O43310;O43310-2	O43310;O43310-2	-		+	2.51205	-0.340066	-4.77591	16.2683	16.3365	16.5534	16.3115	16.2643	16.0035	16.0115	16.0053	0.000496	0.000342	67586.73;67586.73-2	7	5	10	8	5	6	6	5
CHMP4B	Charged multivesicular body protein 4b	Q9H444	Q9H444	-		+	3.66078	-0.339813	-7.89853	17.9835	17.8532	17.8735	17.8287	17.8335	17.5666	17.4789	17.5585	3.1e-05	4.65e-05	24950.2	6	6	5	6	6	6	5	8
BICD2	Protein bicaudal D homolog 2;Isoform 2 of Protein bicaudal D homolog 2	Q8TD16;Q8TD16-2	Q8TD16;Q8TD16-2	-		+	1.31865	-0.339696	-2.47682	16.2092	15.9589	15.5908	15.8301	15.8973	15.6025	15.6023	15.4679	0.000335	0.000247	93533.14;93533.14-2	15	13	8	12	11	7	11	15
RAB43	Ras-related protein Rab-43	Q86YS6	Q86YS6	-			0.746774	-0.339497	-1.52069	15.8897	15.9308	16.5957	15.709	15.7475	15.6029	15.7963	15.5059	0.00111	0.000658	23339.4	7	4	3	2	4	4	4	4
RBM3	RNA-binding protein 3	P98179	P98179	-		+	1.30936	-0.339296	-2.46104	18.0569	18.4009	18.2232	17.7763	18.1177	17.7925	17.7975	17.7371	2.74e-06	3.26e-05	17170.4	3	3	3	2	3	2	2	2
TXNRD1	Thioredoxin reductase 1, cytoplasmic;Isoform 2 of Thioredoxin reductase 1, cytoplasmic;Isoform 3 of Thioredoxin reductase 1, cytoplasmic;Isoform 4 of Thioredoxin reductase 1, cytoplasmic;Isoform 5 of Thioredoxin reductase 1, cytoplasmic;Isoform 6 of Thioredoxin reductase 1, cytoplasmic	Q16881;Q16881-2;Q16881-3;Q16881-4;Q16881-5;Q16881-6	Q16881;Q16881-2;Q16881-3;Q16881-4;Q16881-5;Q16881-6	+	Detoxification;Metabolism;ROS and glutathione metabolism;Selenoproteins		0.761833	-0.3392	-1.54606	19.0784	18.1851	18.3433	18.5969	18.227	18.1585	18.1342	18.148	1.23e-05	3.37e-05	70906.08;70906.08-2;70906.08-3;70906.08-4;70906.08-5;70906.08-6	21	18	18	19	20	20	21	19
TBC1D10B	TBC1 domain family member 10B	Q4KMP7	Q4KMP7	-		+	2.25856	-0.339045	-4.22778	15.9301	15.8834	15.9264	15.6693	15.8967	15.4165	15.6383	15.5116	0.00245	0.00123	87198.7	6	8	6	5	7	5	5	7
SPRYD4	SPRY domain-containing protein 4	Q8WW59	Q8WW59	+	0	+	2.38642	-0.338951	-4.49919	16.6258	16.4788	16.8191	16.5897	16.6903	16.2969	16.2883	16.3202	9.06e-05	8.92e-05	23128.5	7	5	5	5	8	6	3	4
AASS	Alpha-aminoadipic semialdehyde synthase, mitochondrial	Q9UDR5	Q9UDR5	+	Amino acid metabolism;Lysine metabolism;Metabolism		0.56417	-0.338765	-1.2318	15.6562	15.7456	14.9787	NaN	16.0848	15.312	15.2269	15.2938	0.0143	0.00591	102132	2	5	1	NaN	1	6	5	5
PACS2	Phosphofurin acidic cluster sorting protein 2;Isoform 2 of Phosphofurin acidic cluster sorting protein 2;Isoform 3 of Phosphofurin acidic cluster sorting protein 2;Isoform 4 of Phosphofurin acidic cluster sorting protein 2	Q86VP3;Q86VP3-2;Q86VP3-3;Q86VP3-4	Q86VP3;Q86VP3-2;Q86VP3-3;Q86VP3-4	-		+	1.39283	-0.338643	-2.60347	15.1006	15.3076	15.0235	15.1365	14.9495	14.4912	14.9522	14.8514	0.00469485	0.0020288	97702.31;97702.31-2;97702.31-3;97702.31-4	3	2	2	2	1	1	1	1
UBXN6	UBX domain-containing protein 6	Q9BZV1	Q9BZV1	-		+	1.59155	-0.33852	-2.95002	16.7146	16.8732	16.9775	16.5194	16.65	16.4833	16.3062	16.4358	0.00014	0.000121	49753.7	7	8	10	8	8	6	8	9
HAGH	Hydroxyacylglutathione hydrolase, mitochondrial;Isoform 2 of Hydroxyacylglutathione hydrolase, mitochondrial	Q16775;Q16775-2	Q16775;Q16775-2	+	Detoxification;Metabolism;ROS and glutathione metabolism	+	2.80768	-0.338332	-5.47055	16.7055	16.6796	16.4597	16.6799	16.6877	16.3116	16.281	16.3198	1.97e-05	3.76e-05	33805.85;33805.85-2	5	6	5	6	6	5	6	6
CNDP2	Cytosolic non-specific dipeptidase	Q96KP4	Q96KP4	-		+	1.94404	-0.338232	-3.59936	18.5084	18.2319	18.4782	18.2799	18.2032	18.0436	17.8939	18.0688	1.45e-06	3.26e-05	52878.5	20	18	18	19	17	18	19	19
UROD	Uroporphyrinogen decarboxylase	P06132	P06132	-		+	2.53623	-0.337804	-4.83037	17.7916	17.9251	17.6143	17.7477	17.7419	17.3682	17.4606	17.4502	3.05e-06	3.26e-05	40786.9	9	8	8	9	9	9	9	9
LRRFIP2	Leucine-rich repeat flightless-interacting protein 2;Isoform 4 of Leucine-rich repeat flightless-interacting protein 2	Q9Y608;Q9Y608-4	Q9Y608;Q9Y608-4	-			1.18283	-0.337099	-2.24779	16.8656	17.2866	16.6058	16.8034	16.9156	16.5973	16.584	16.4936	9.63e-05	9.3e-05	82171.44;82171.44-4	13	13	12	13	13	11	13	11
DARS2	Aspartate--tRNA ligase, mitochondrial	Q6PI48	Q6PI48	+	Mitochondrial central dogma;mt-tRNA synthetases;Translation	+	1.34723	-0.336563	-2.52546	17.1968	16.9553	17.2823	16.9403	17.1023	16.5114	16.7851	16.98	7.8e-05	8.01e-05	73562.7	10	8	6	5	6	6	9	7
NUP54	Nucleoporin p54;Isoform 3 of Nucleoporin p54	Q7Z3B4;Q7Z3B4-3	Q7Z3B4;Q7Z3B4-3	-		+	2.52769	-0.33655	-4.81109	16.2103	16.2748	16.0595	16.1282	16.3085	15.8932	15.9174	15.7686	0.000109	0.000102	55435.45;55435.45-3	9	12	9	9	10	7	7	6
WDR18	WD repeat-containing protein 18	Q9BV38	Q9BV38	-		+	2.67979	-0.33594	-5.16216	17.2018	17.024	17.2629	17.2396	17.171	16.9208	16.8472	16.7638	0.00013	0.000115	47405.2	6	5	8	4	6	4	6	5
LMOD1	Leiomodin-1;Isoform 2 of Leiomodin-1	P29536;P29536-2	P29536;P29536-2	-			0.789357	-0.33571	-1.59231	16.5668	17.0875	17.2025	16.4711	17.1611	16.6446	16.5169	16.5247	0.000116	0.000106	67030.07;67030.07-2	9	13	12	9	13	5	7	7
SNX6	Sorting nexin-6	Q9UNH7	Q9UNH7	-		+	2.31225	-0.33476	-4.34054	17.0723	17.246	17.2475	17.3203	17.0883	16.7655	16.9621	16.8528	4.69e-05	5.71e-05	46648.8	17	19	17	19	18	17	16	17
IKBKB	Inhibitor of nuclear factor kappa-B kinase subunit beta	O14920	O14920	-		+	1.57907	-0.334646	-2.92789	15.9612	16.2024	15.8635	15.7658	16.0247	15.6709	15.7391	15.4767	8.93e-05	8.83e-05	86563.9	12	11	8	9	12	9	10	11
UCHL5	Ubiquitin carboxyl-terminal hydrolase isozyme L5;Isoform 2 of Ubiquitin carboxyl-terminal hydrolase isozyme L5;Isoform 3 of Ubiquitin carboxyl-terminal hydrolase isozyme L5;Isoform 4 of Ubiquitin carboxyl-terminal hydrolase isozyme L5	Q9Y5K5;Q9Y5K5-2;Q9Y5K5-3;Q9Y5K5-4	Q9Y5K5;Q9Y5K5-2;Q9Y5K5-3;Q9Y5K5-4	-		+	2.40118	-0.334582	-4.53117	16.9446	16.6731	16.7729	16.7617	16.9185	16.446	16.5572	16.4356	0.000187	0.000152	37606.88;37606.88-2;37606.88-3;37606.88-4	9	10	10	8	10	9	8	8
CCZ1B;CCZ1	Vacuolar fusion protein CCZ1 homolog B;Vacuolar fusion protein CCZ1 homolog	P86790;P86791	P86790;P86791			+	1.9528	-0.334004	-3.61617	15.4658	15.4323	15.6516	15.4121	15.623	15.1622	15.3436	15.043	0.0032319	0.00142853	55866.2	2	4	4	3	2	1	2	2
HSD3B7	3 beta-hydroxysteroid dehydrogenase type 7	Q9H2F3	Q9H2F3	-			0.272041	-0.333769	-0.678791	16.2382	14.6435	14.9661	NaN	NaN	15.0052	15.0301	14.8112	0.000307309	0.000230334	41016.2	5	4	2	NaN	NaN	3	3	4
AKR7A2	Aflatoxin B1 aldehyde reductase member 2	O43488	O43488	+	Amino acid metabolism;Detoxification;GABA metabolism;Metabolism;Xenobiotic metabolism		1.06743	-0.333646	-2.05524	18.0826	18.6817	18.7915	18.57	18.5445	18.1608	18.2405	18.1999	2.73e-05	4.38e-05	39589	9	10	10	10	10	10	10	10
MAP3K20	Isoform 2 of Mitogen-activated protein kinase kinase kinase 20	Q9NYL2-2	Q9NYL2-2	-			0.282818	-0.33349	-0.680761	19.0804	18.3675	17.3427	17.2785	18.6635	18.0858	17.6884	17.6648	4.48e-06	3.26e-05	51582.4	2	1	1	1	1	1	1	1
SBF1	Myotubularin-related protein 5;Isoform 4 of Myotubularin-related protein 5;Isoform 5 of Myotubularin-related protein 5	O95248;O95248-4;O95248-5	O95248;O95248-4;O95248-5	-			1.28382	-0.333448	-2.41777	15.4451	15.6205	15.8262	15.7316	15.3464	15.1162	15.2194	15.446	0.00154	0.000859	208443.32;208443.32-4;208443.32-5	5	7	7	8	5	7	4	4
UPF2	Regulator of nonsense transcripts 2	Q9HAU5	Q9HAU5	-			0.985515	-0.332073	-1.91912	16.5337	16.3928	16.4427	16.2714	16.4642	15.6453	16.2695	16.3519	7.51e-05	7.78e-05	147810	10	11	9	8	8	9	13	12
HPS3	Hermansky-Pudlak syndrome 3 protein;Isoform 2 of Hermansky-Pudlak syndrome 3 protein	Q969F9;Q969F9-2	Q969F9;Q969F9-2	-		+	1.41038	-0.331978	-3.02763	13.279	13.1284	13.3227	13.3258	NaN	NaN	13.0703	12.7937	0.00284	0.00133	113735.8;113735.8-2	1	2	2	2	NaN	NaN	1	1
TTC39B	Tetratricopeptide repeat protein 39B;Isoform 2 of Tetratricopeptide repeat protein 39B;Isoform 3 of Tetratricopeptide repeat protein 39B;Isoform 4 of Tetratricopeptide repeat protein 39B	Q5VTQ0;Q5VTQ0-2;Q5VTQ0-3;Q5VTQ0-4	Q5VTQ0;Q5VTQ0-2;Q5VTQ0-3;Q5VTQ0-4	-			0.376428	-0.331099	-0.864923	15.4412	15.8845	16.7283	16.3293	15.3584	15.6234	15.9922	15.2362	0.00326185	0.00144	76955.64;76955.64-2;76955.64-3;76955.64-4	2	2	3	3	2	2	3	2
ANKFY1	Rabankyrin-5	Q9P2R3	Q9P2R3	-		+	3.82251	-0.330885	-8.44512	16.872	17.0448	16.956	16.9804	17.0096	16.6336	16.6539	16.6375	1.82e-05	3.64e-05	128399	22	25	21	23	25	18	19	18
CRYZ	Quinone oxidoreductase	Q08257	Q08257	+	0		0.590421	-0.330204	-1.2531	17.5796	17.7471	17.1743	16.9365	18.0322	17.2178	17.0997	17.1737	9.55e-06	3.34e-05	35206.6	13	13	12	13	13	12	12	11
LARP4B	La-related protein 4B	Q92615	Q92615	-		+	1.31257	-0.329369	-2.46649	16.6182	16.5225	16.1778	16.1196	16.3694	15.9987	15.963	16.1347	8.94e-05	8.83e-05	80552	7	9	7	6	7	5	3	4
VPS52	Vacuolar protein sorting-associated protein 52 homolog	Q8N1B4	Q8N1B4	-		+	1.75547	-0.32934	-3.24573	15.9177	16.0527	16.2188	16.277	15.9995	15.6444	15.7806	15.8663	0.00204	0.00109	82221.2	7	8	7	7	10	8	8	7
TTC4	Tetratricopeptide repeat protein 4	O95801	O95801	-			0.578359	-0.328613	-1.23204	16.2677	16.1133	17.1934	16.1976	16.3183	16.2122	16.0637	15.9924	0.00275	0.00131	44678.5	4	2	1	1	3	1	2	2
EPRS1	Bifunctional glutamate/proline--tRNA ligase	P07814	P07814	-			1.10016	-0.327783	-2.10971	17.6314	17.6203	18.1995	18.0324	17.7275	17.5024	17.5026	17.5383	1e-05	3.35e-05	170591	62	60	70	63	66	60	58	56
SPHK2	Sphingosine kinase 2;Isoform 2 of Sphingosine kinase 2;Isoform 4 of Sphingosine kinase 2;Isoform 5 of Sphingosine kinase 2	Q9NRA0;Q9NRA0-2;Q9NRA0-4;Q9NRA0-5	Q9NRA0;Q9NRA0-2;Q9NRA0-4;Q9NRA0-5	+	Apoptosis;Lipid metabolism;Metabolism;Mitochondrial dynamics and surveillance;Phospholipid metabolism		0.533434	-0.327205	-1.17528	15.2488	15.858	NaN	15.5504	15.1351	14.6542	15.2503	15.4581	0.0119	0.00495	69217.22;69217.22-2;69217.22-4;69217.22-5	1	1	NaN	2	1	1	2	3
WNT5A	Protein Wnt-5a;Isoform 2 of Protein Wnt-5a	P41221;P41221-2	P41221;P41221-2	-			0.268036	-0.327176	-0.650497	15.8573	16.568	16.8682	17.9687	16.0073	16.2719	16.4127	16.2956	0.000179	0.000148	42339.48;42339.48-2	2	4	4	7	3	2	4	3
ZZEF1	Zinc finger ZZ-type and EF-hand domain-containing protein 1	O43149	O43149	-		+	1.8282	-0.326288	-3.3803	15.3639	15.3319	15.2915	15.3206	15.5065	15.2592	14.8937	14.9568	0.00107	0.00064	331075	10	9	8	6	10	3	6	6
UBR7	Putative E3 ubiquitin-protein ligase UBR7	Q8N806	Q8N806	-		+	1.34944	-0.326047	-2.52923	16.6008	16.4658	16.4795	16.7538	16.1781	16.1864	16.1026	16.2197	0.00193	0.00104	47998.8	3	3	1	2	3	3	3	2
SEC14L2	SEC14-like protein 2;Isoform 3 of SEC14-like protein 2	O76054;O76054-5	O76054;O76054-5	-			0.991322	-0.325601	-1.92877	16.3444	16.3673	16.7068	16.4825	15.9609	16.1615	16.0476	15.9312	0.00209	0.0011	46145.22;46145.22-5	2	2	2	2	2	2	2	2
GPKOW	G-patch domain and KOW motifs-containing protein	Q92917	Q92917	-			1.15534	-0.325547	-2.20179	15.881	15.6972	15.5263	15.3103	15.8432	15.3613	15.4098	15.2072	0.000139	0.000121	52228.8	5	6	4	4	6	3	3	3
DNAJC7	DnaJ homolog subfamily C member 7	Q99615	Q99615	-		+	4.58699	-0.325367	-11.5069	16.5732	16.5289	16.4986	16.5332	16.6132	16.1978	16.2315	16.2429	9.45e-05	9.19e-05	56440.8	16	16	14	16	16	15	15	16
TBCK	TBC domain-containing protein kinase-like protein	Q8TEA7	Q8TEA7	-			1.17421	-0.325308	-2.23335	15.1831	15.1047	14.9797	14.917	14.6167	14.463	14.6789	14.7629	0.00101	0.000607	100679	2	5	2	3	3	2	1	1
ATP2B4	Plasma membrane calcium-transporting ATPase 4;Isoform XB of Plasma membrane calcium-transporting ATPase 4;Isoform ZB of Plasma membrane calcium-transporting ATPase 4;Isoform ZD of Plasma membrane calcium-transporting ATPase 4	P23634;P23634-6;P23634-7;P23634-8	P23634;P23634-6;P23634-7;P23634-8	-			0.888146	-0.324594	-1.75731	18.4592	18.1951	17.6907	17.9046	18.2978	17.8007	17.7995	17.7545	7.21e-06	3.31e-05	137920.16;137920.16-6;137920.16-7;137920.16-8	36	36	33	34	37	35	36	34
SNTB2	Beta-2-syntrophin	Q13425	Q13425	-		+	2.31385	-0.324589	-4.34392	16.8055	16.8465	16.8531	16.5742	16.6802	16.4397	16.4647	16.3776	7.08e-06	3.31e-05	57949.6	15	15	16	15	15	15	16	17
TAPBP	Tapasin;Isoform 2 of Tapasin;Isoform 3 of Tapasin	O15533;O15533-2;O15533-3	O15533;O15533-2;O15533-3	-		+	2.12063	-0.324463	-3.94572	17.9068	18.1313	18.027	18.162	17.8676	17.6603	17.6583	17.7648	0.00133374	0.000764937	47625.76;47625.76-2;47625.76-3	3	4	4	4	3	3	3	3
RALB	Ras-related protein Ral-B;Isoform 2 of Ras-related protein Ral-B;Isoform 3 of Ras-related protein Ral-B	P11234;P11234-2;P11234-3	P11234;P11234-2;P11234-3	-		+	2.25151	-0.32405	-4.2131	17.3934	17.252	17.1355	17.2303	17.3983	16.919	16.8956	17.0588	4.14e-05	5.32e-05	23408.55;23408.55-2;23408.55-3	9	8	8	7	7	8	8	9
RHOG	Rho-related GTP-binding protein RhoG	P84095	P84095	-		+	3.76007	-0.324021	-8.23038	17.8568	17.7885	17.7737	17.6987	17.7483	17.5009	17.4199	17.4267	2.14e-05	3.9e-05	21308.5	7	7	6	6	7	7	6	7
UBL5	Ubiquitin-like protein 5	Q9BZL1	Q9BZL1	-		+	1.6399	-0.323837	-3.03621	16.0696	16.1115	15.705	15.8552	15.9283	15.7236	15.5605	15.5462	0.000102	9.67e-05	8546.92	2	2	2	2	2	3	3	3
FAM160A2	FTS and Hook-interacting protein;Isoform 2 of FTS and Hook-interacting protein	Q8N612;Q8N612-2	Q8N612;Q8N612-2	-		+	2.99232	-0.323517	-5.93873	16.5606	16.5747	16.3978	16.5594	16.4791	16.132	16.1674	16.2729	0.00282585	0.00132638	105568.23;105568.23-2	2	2	3	3	2	2	2	1
PDPK1	3-phosphoinositide-dependent protein kinase 1;Isoform 3 of 3-phosphoinositide-dependent protein kinase 1	O15530;O15530-3	O15530;O15530-3	-		+	2.3439	-0.323481	-4.40782	15.7624	15.9023	15.7057	15.7642	15.7689	15.3089	15.5881	15.4746	0.00307	0.00138	63151.85;63151.85-3	4	4	2	4	5	2	4	2
COMMD10	COMM domain-containing protein 10	Q9Y6G5	Q9Y6G5	-		+	1.59344	-0.323086	-2.95337	15.6008	15.6369	15.7654	15.3952	15.3532	15.2968	15.2562	15.1287	0.0030134	0.00135888	22966.4	2	4	4	5	2	3	4	3
CALD1	Isoform 4 of Caldesmon	Q05682-4	Q05682-4	-			0.680041	-0.322987	-1.40752	17.6836	18.5871	18.3813	18.6454	18.2658	17.9402	18.0061	18.0226	0.00010434	9.82e-05	62663.3	2	2	2	2	2	2	2	2
NF2	Merlin;Isoform 2 of Merlin;Isoform 3 of Merlin;Isoform 5 of Merlin;Isoform 8 of Merlin	P35240;P35240-2;P35240-3;P35240-5;P35240-8	P35240;P35240-2;P35240-3;P35240-5;P35240-8	-			1.24829	-0.322785	-2.35777	16.4305	16.6003	16.0011	16.3651	16.4419	16.0531	16.1208	15.9611	0.000387411	0.000278936	69690.15;69690.15-2;69690.15-3;69690.15-5;69690.15-8	11	12	9	11	10	5	5	4
ASCC2	Activating signal cointegrator 1 complex subunit 2	Q9H1I8	Q9H1I8	-		+	4.44002	-0.322714	-10.8502	16.9489	16.9189	16.8903	17.013	16.9122	16.6288	16.5895	16.6236	4.31e-06	3.26e-05	86360.4	9	9	9	9	8	8	9	10
HDAC6	Histone deacetylase 6;Isoform 2 of Histone deacetylase 6	Q9UBN7;Q9UBN7-2	Q9UBN7;Q9UBN7-2	-			0.617571	-0.3226	-1.32911	15.7958	16.1584	16.4782	16.2434	15.7242	15.6524	NaN	15.8624	0.00236	0.0012	131419.21;131419.21-2	1	3	4	3	1	2	NaN	2
LRWD1	Leucine-rich repeat and WD repeat-containing protein 1	Q9UFC0	Q9UFC0	-			0.506946	-0.3224	-1.12621	16.2433	15.1926	NaN	15.8884	16.1753	15.4708	15.5741	15.6126	6.32e-05	6.92e-05	70861.2	1	1	NaN	2	2	1	1	1
POTEJ	POTE ankyrin domain family member J	P0CG39	P0CG39	-		+	4.15135	-0.321326	-9.65879	20.3778	20.3659	20.4492	20.3171	20.4217	20.1008	20.0427	20.0516	2.81e-05	4.43e-05	117390	7	6	8	6	6	5	5	5
RPL23A	60S ribosomal protein L23a	P62750	P62750	-		+	5.50151	-0.321202	-16.5068	18.9484	18.9477	18.9349	18.9206	18.9121	18.6085	18.5731	18.653	1.16e-05	3.36e-05	17695.1	10	10	10	10	10	10	10	10
RASAL2	Isoform 2 of Ras GTPase-activating protein nGAP	Q9UJF2-2	Q9UJF2-2	-			1.29056	-0.320941	-2.42918	15.8585	15.4322	15.4792	15.395	15.8087	15.2787	15.2453	15.2973	0.00171528	0.000941531	143899	6	4	4	4	7	6	4	6
GBE1	1,4-alpha-glucan-branching enzyme	Q04446	Q04446	-		+	1.39338	-0.320733	-2.60441	18.2802	18.0924	18.3494	17.8205	18.182	17.8022	17.8502	17.82	3.6e-06	3.26e-05	80473.9	27	27	26	26	27	26	26	25
APLP2	Amyloid-like protein 2;Isoform 3 of Amyloid-like protein 2;Isoform 6 of Amyloid-like protein 2	Q06481;Q06481-3;Q06481-6	Q06481;Q06481-3;Q06481-6	-			0.3064	-0.319937	-0.72831	17.0319	15.7559	15.2818	15.4883	16.5036	15.6307	15.651	15.7953	5.68e-06	3.26e-05	86955.77;86955.77-3;86955.77-6	16	10	6	8	16	11	9	9
CCS	Copper chaperone for superoxide dismutase	O14618	O14618	-		+	1.50275	-0.319921	-2.79371	17.2049	17.0422	17.21	16.8168	17.0426	16.6676	16.9149	16.6476	0.000830564	0.00051607	29040.6	3	4	3	3	4	3	4	4
EPB41L3	Isoform 2 of Band 4.1-like protein 3	Q9Y2J2-2	Q9Y2J2-2	-			0.38843	-0.318974	-0.887737	17.0982	16.5225	17.1226	15.7401	16.1661	16.0925	16.2476	16.2927	1.33e-05	3.42e-05	96513.7	39	31	38	22	28	14	16	16
ELOB	Elongin-B;Isoform 2 of Elongin-B	Q15370;Q15370-2	Q15370;Q15370-2	-		+	2.19574	-0.318312	-4.09799	18.165	18.1293	18.0468	17.8464	17.9827	17.6733	17.759	17.7148	7.23e-06	3.31e-05	13132.81;13132.81-2	7	8	7	7	7	7	8	7
WBP11	WW domain-binding protein 11	Q9Y2W2	Q9Y2W2	-			1.2021	-0.318269	-2.2801	16.4107	16.5247	16.5295	16.0316	16.4857	16.2486	15.983	16.0029	0.0023565	0.00119355	69997.6	6	5	4	3	4	3	4	3
TKT	Transketolase;Isoform 2 of Transketolase	P29401;P29401-2	P29401;P29401-2	mito-interacting		+	2.10071	-0.318181	-3.90584	18.6545	18.7715	18.4212	18.5015	18.5969	18.258	18.299	18.2557	8.84e-07	3.26e-05	67877.63;67877.63-2	28	29	28	28	28	29	28	28
SNRPB2	U2 small nuclear ribonucleoprotein B''	P08579	P08579	-			0.784166	-0.31813	-1.5836	16.7193	16.8932	16.4244	16.776	16.7359	16.3896	15.9841	16.8012	8.5e-05	8.54e-05	25486.3	5	4	3	4	4	4	4	4
RBM12B	RNA-binding protein 12B	Q8IXT5	Q8IXT5	-		+	2.07423	-0.318008	-3.85318	16.1293	16.2972	15.9781	16.0921	16.2744	15.8988	15.7914	15.8184	0.000152106	0.000129996	118103	9	5	11	8	8	5	8	10
EHD4	EH domain-containing protein 4	Q9H223	Q9H223	-			0.874986	-0.316873	-1.7354	18.7813	18.061	18.3087	18.0252	18.1894	17.9316	17.9439	17.9933	4.93e-05	5.9e-05	61175.1	18	16	15	15	15	16	17	17
GLUD1	Glutamate dehydrogenase 1, mitochondrial	P00367	P00367	+	Amino acid metabolism;GABA metabolism;Glutamate metabolism;Metabolism	+	1.42793	-0.31615	-2.66387	18.5068	18.2878	18.0315	18.1877	18.4617	17.9986	17.9231	18.0152	1.16e-05	3.36e-05	61397.9	22	22	22	22	22	21	21	21
ATXN2L	Ataxin-2-like protein;Isoform 2 of Ataxin-2-like protein;Isoform 3 of Ataxin-2-like protein;Isoform 4 of Ataxin-2-like protein;Isoform 5 of Ataxin-2-like protein;Isoform 6 of Ataxin-2-like protein;Isoform 8 of Ataxin-2-like protein;Isoform 9 of Ataxin-2-like protein	Q8WWM7;Q8WWM7-2;Q8WWM7-3;Q8WWM7-4;Q8WWM7-5;Q8WWM7-6;Q8WWM7-8;Q8WWM7-9	Q8WWM7;Q8WWM7-2;Q8WWM7-3;Q8WWM7-4;Q8WWM7-5;Q8WWM7-6;Q8WWM7-8;Q8WWM7-9	-		+	1.46435	-0.316113	-2.72688	16.3887	16.3947	16.4056	16.1521	16.4533	16.2932	15.8946	15.9404	2.7e-05	4.34e-05	113373.57;113373.57-2;113373.57-3;113373.57-4;113373.57-5;113373.57-6;113373.57-8;113373.57-9	19	15	17	14	20	8	12	11
TCP1	T-complex protein 1 subunit alpha	P17987	P17987	-		+	3.43016	-0.315443	-7.17099	18.6592	18.5854	18.4984	18.4956	18.5206	18.2683	18.2376	18.2033	8.19e-06	3.33e-05	60343.6	28	27	27	27	27	27	26	27
BCAR3	Breast cancer anti-estrogen resistance protein 3	O75815	O75815	-			1.05285	-0.315152	-2.03099	15.6623	15.9845	15.4855	15.4795	16.0072	15.4317	15.3695	15.4248	0.00264297	0.00128203	92565.5	7	12	3	5	9	6	6	6
REXO2	Oligoribonuclease, mitochondrial	Q9Y3B8	Q9Y3B8	+	Mitochondrial central dogma;mtRNA metabolism;mtRNA stability and decay	+	2.07985	-0.315089	-3.86431	17.9121	17.6255	17.9384	17.7308	17.7071	17.4542	17.4888	17.4601	6.9e-06	3.31e-05	26832.8	10	8	8	8	8	8	8	8
SMAD4	Mothers against decapentaplegic homolog 4	Q13485	Q13485	-			0.195254	-0.314648	-0.495468	15.7826	16.1473	13.772	16.5105	15.4974	15.0909	15.2183	15.3728	0.000583	0.000389	60439.1	3	2	2	3	3	3	3	3
SERPINB1	Leukocyte elastase inhibitor	P30740	P30740	-		+	2.23125	-0.314316	-4.17108	17.2421	16.9546	17.1877	17.0288	17.0019	16.7886	16.7362	16.7812	6.26e-05	6.88e-05	42741.8	10	11	11	11	11	12	11	11
DNPH1	2'-deoxynucleoside 5'-phosphate N-hydrolase 1	O43598	O43598	-			0.784102	-0.313386	-1.58349	16.6805	16.8287	17.4281	17.2032	16.9704	16.8531	16.4708	16.8024	0.000229	0.00018	19108.4	2	2	2	2	2	2	1	2
UBR1	E3 ubiquitin-protein ligase UBR1	Q8IWV7	Q8IWV7	-		+	3.18479	-0.313045	-6.45803	15.7991	15.7014	15.7616	15.6235	15.625	15.3721	15.3759	15.4191	0.000363433	0.000264356	200211	12	15	13	12	11	11	12	14
MRPS9	28S ribosomal protein S9, mitochondrial	P82933	P82933	+	Mitochondrial central dogma;Mitochondrial ribosome;mtRNA granules;mtRNA metabolism;SSU;Translation	+	3.13857	-0.312385	-6.33026	16.7069	16.7546	16.7493	16.7481	16.8869	16.3815	16.501	16.4879	3.42e-05	4.84e-05	45834.8	5	6	6	8	5	8	6	9
RUFY2	RUN and FYVE domain-containing protein 2;Isoform 5 of RUN and FYVE domain-containing protein 2;Isoform 2 of RUN and FYVE domain-containing protein 2	Q8WXA3;Q8WXA3-1;Q8WXA3-3	Q8WXA3;Q8WXA3-1;Q8WXA3-3	-			1.23693	-0.312356	-2.33863	15.5403	16.0028	15.9436	15.8438	15.6944	15.4788	15.6702	15.3288	0.00366	0.0016	70010.21;70010.21-1;70010.21-3	6	5	2	5	4	6	2	5
RIPOR1	Rho family-interacting cell polarization regulator 1;Isoform 2 of Rho family-interacting cell polarization regulator 1;Isoform 3 of Rho family-interacting cell polarization regulator 1;Isoform 4 of Rho family-interacting cell polarization regulator 1	Q6ZS17;Q6ZS17-2;Q6ZS17-3;Q6ZS17-4	Q6ZS17;Q6ZS17-2;Q6ZS17-3;Q6ZS17-4	-			0.977594	-0.312339	-1.90597	16.3311	16.1293	15.7056	15.8784	16.2883	15.7842	15.8166	15.6618	0.000236274	0.000183987	132307.67;132307.67-2;132307.67-3;132307.67-4	13	14	8	11	11	6	9	8
PLPP3	Phospholipid phosphatase 3	O14495	O14495	-			0.289631	-0.312074	-0.694589	18.269	16.6832	18.1449	16.7483	17.6439	17.1637	17.1257	17.2679	2e-05	3.78e-05	35116	6	4	6	4	5	4	4	4
LOXL2	Lysyl oxidase homolog 2	Q9Y4K0	Q9Y4K0	-			0.410287	-0.311583	-0.92889	16.4444	16.9044	16.2147	17.5528	16.256	16.3415	16.3996	16.3475	5.01e-05	5.96e-05	86724.8	14	15	12	18	12	14	14	16
COPS7B	COP9 signalosome complex subunit 7b	Q9H9Q2	Q9H9Q2	-			0.964163	-0.311508	-1.88366	15.8168	15.5481	15.4558	15.0707	15.3945	15.0673	15.2463	15.1233	0.000872897	0.000537238	29622	5	3	3	3	3	3	3	3
FBN2	Fibrillin-2	P35556	P35556	-			1.28179	-0.311175	-2.41433	16.3792	16.6481	16.2118	16.2029	16.6029	16.1316	16.017	16.1447	0.000237402	0.000184478	314775	23	27	19	19	27	17	22	16
ETFB	Electron transfer flavoprotein subunit beta	P38117	P38117	+	Metabolism;Amino acid metabolism;Branched-chain amino acid metabolism;Choline and betaine metabolism;Electron carriers;Fatty acid oxidation;Glycine metabolism;Lipid metabolism;Lysine metabolism;Metabolism;Q-linked reactions, other;Vitamin metabolism	+	2.6899	-0.310569	-5.18609	18.2342	18.2443	18.3583	18.1439	18.3782	17.9166	17.981	17.9861	1.1e-05	3.36e-05	27843.6	14	14	13	13	12	12	12	12
DOP1B	Protein dopey-2;Isoform 2 of Protein dopey-2	Q9Y3R5;Q9Y3R5-2	Q9Y3R5;Q9Y3R5-2	-			0.591997	-0.310553	-1.25584	16.1881	16.4275	15.3814	15.7514	16.0165	15.547	15.5843	15.796	0.000433473	0.000306628	258230.14;258230.14-2	4	3	1	2	9	3	4	2
RCOR1	REST corepressor 1	Q9UKL0	Q9UKL0	-			1.14841	-0.309676	-2.19022	15.7804	16.0392	15.9038	15.6805	15.581	15.5376	15.2494	15.6749	0.00109	0.000647	53327.4	2	3	1	3	2	4	3	4
BCCIP	BRCA2 and CDKN1A-interacting protein	Q9P287	Q9P287	-			0.905468	-0.309108	-1.78613	16.7251	16.56	16.0921	16.3091	16.6901	16.3159	16.1723	16.0102	0.00115731	0.000679745	35979.5	4	4	4	4	4	4	4	4
MBNL2	Muscleblind-like protein 2;Isoform 2 of Muscleblind-like protein 2;Isoform 3 of Muscleblind-like protein 2	Q5VZF2;Q5VZF2-2;Q5VZF2-3	Q5VZF2;Q5VZF2-2;Q5VZF2-3	-			0.915289	-0.30908	-1.86277	15.3962	NaN	15.2511	14.9902	14.8882	14.8993	14.9622	14.6056	0.00293	0.00134	40517.63;40517.63-2;40517.63-3	2	NaN	2	2	2	2	2	3
PCYT1A	Choline-phosphate cytidylyltransferase A	P49585	P49585	-		+	2.99215	-0.309046	-5.93829	17.3889	17.4599	17.2649	17.3985	17.4721	17.0447	17.1261	17.0926	1.47e-05	3.47e-05	41731	11	11	12	9	11	10	9	10
BMP2K	BMP-2-inducible protein kinase	Q9NSY1	Q9NSY1	-			1.19228	-0.308958	-2.26362	16.8149	16.8838	16.4477	16.9718	16.9173	16.598	16.3477	16.5487	0.00089886	0.000550467	129172	6	8	5	8	7	4	6	6
PSMC1	26S proteasome regulatory subunit 4	P62191	P62191	-		+	4.30206	-0.30889	-10.2651	17.9124	17.9761	17.9189	17.8959	17.9533	17.6126	17.6812	17.5736	1.34e-05	3.43e-05	49184.5	20	19	21	20	20	19	19	19
ALG13	Isoform 2 of Putative bifunctional UDP-N-acetylglucosamine transferase and deubiquitinase ALG13	Q9NP73-2	Q9NP73-2	-			0.959626	-0.308827	-1.87613	15.6961	15.593	15.4365	15.4871	15.2483	14.8369	15.4286	15.2846	0.00316	0.0014	18225.1	2	3	3	2	3	3	4	3
CCT3	T-complex protein 1 subunit gamma	P49368	P49368	-		+	3.56263	-0.30857	-7.58172	18.6742	18.5488	18.5022	18.5674	18.602	18.2621	18.3061	18.2429	1.45e-05	3.47e-05	60533.9	36	38	37	38	39	32	35	33
TFG	Protein TFG;Isoform 2 of Protein TFG;Isoform 3 of Protein TFG;Isoform 4 of Protein TFG	Q92734;Q92734-2;Q92734-3;Q92734-4	Q92734;Q92734-2;Q92734-3;Q92734-4	-		+	3.27051	-0.308542	-6.70034	18.6475	18.534	18.6628	18.5732	18.6254	18.2098	18.3521	18.3382	7.6e-05	7.85e-05	43447.94;43447.94-2;43447.94-3;43447.94-4	7	7	7	8	7	6	7	7
PDCD6IP	Programmed cell death 6-interacting protein	Q8WUM4	Q8WUM4	-		+	5.55865	-0.30838	-16.8797	18.0322	17.9758	17.9913	17.979	17.9787	17.6694	17.7149	17.6648	1.94e-05	3.72e-05	96023.2	48	46	49	45	48	43	43	42
TRIM16	Tripartite motif-containing protein 16	O95361	O95361	-			1.24783	-0.308076	-2.35699	16.0224	16.5123	16.2723	16.4951	16.1567	15.9056	16.0536	15.9919	0.00042	0.000298	63955.2	10	8	7	8	4	9	10	10
UCHL3	Ubiquitin carboxyl-terminal hydrolase isozyme L3	P15374	P15374	-		+	1.43219	-0.308064	-2.67122	16.6931	16.9465	16.7015	16.6621	16.4097	16.3282	16.4245	16.3709	0.000538228	0.000365608	26182.6	9	8	7	8	6	8	9	8
GGCT	Gamma-glutamylcyclotransferase	O75223	O75223	-			0.775205	-0.307737	-1.56855	16.1702	16.3845	17.038	16.5148	16.6017	16.2314	16.1363	16.3345	5.68e-05	6.46e-05	21007.7	5	5	6	6	5	4	6	7
EDF1	Endothelial differentiation-related factor 1;Isoform 2 of Endothelial differentiation-related factor 1;Isoform 3 of Endothelial differentiation-related factor 1	O60869;O60869-2;O60869-3	O60869;O60869-2;O60869-3	-		+	2.89969	-0.307726	-5.70035	17.6842	17.541	17.5581	17.6535	17.7498	17.3236	17.3003	17.3649	2.19e-05	3.95e-05	16368.68;16368.68-2;16368.68-3	5	5	5	5	5	5	5	5
SRM	Spermidine synthase	P19623	P19623	-		+	2.01861	-0.307543	-3.74371	18.9681	18.7237	19.059	18.9487	18.8593	18.6825	18.5305	18.5996	3.3e-05	4.76e-05	33824.7	13	13	12	12	11	11	12	11
APPL1	DCC-interacting protein 13-alpha	Q9UKG1	Q9UKG1	-		+	2.31118	-0.306844	-4.33827	16.1803	16.1677	16.3769	16.1344	16.2635	15.8132	15.9394	16.0005	2.53e-05	4.24e-05	79663.5	11	11	12	9	10	8	11	8
VPS33B	Vacuolar protein sorting-associated protein 33B	Q9H267	Q9H267	-		+	3.70541	-0.306758	-8.04624	16.3241	16.2484	16.2816	16.2587	16.186	15.9098	16.0157	15.9335	0.00121	0.000703	70585.3	9	11	9	6	8	5	6	7
ZRANB2	Zinc finger Ran-binding domain-containing protein 2;Isoform 2 of Zinc finger Ran-binding domain-containing protein 2	O95218;O95218-2	O95218;O95218-2	-			1.2952	-0.30643	-2.43703	16.1573	16.1079	15.8985	15.6385	16.0265	15.6293	15.628	15.7207	0.00217866	0.00113467	37404.42;37404.42-2	5	4	6	5	5	7	6	6
DAB2	Disabled homolog 2;Isoform 3 of Disabled homolog 2	P98082;P98082-3	P98082;P98082-3	-			1.02347	-0.306414	-1.98217	17.9439	17.9801	17.7266	17.3446	17.6962	17.4533	17.3487	17.4936	9.83e-06	3.34e-05	82447.86;82447.86-3	17	18	18	12	16	7	8	8
KTN1	Kinectin	Q86UP2	Q86UP2	-		+	2.16516	-0.306109	-4.03561	16.4561	16.5176	16.5751	16.7897	16.5448	16.2615	16.2842	16.266	2.2e-05	3.96e-05	156275	53	55	56	59	53	47	48	46
DHX37	Probable ATP-dependent RNA helicase DHX37	Q8IY37	Q8IY37	-		+	1.3963	-0.306035	-2.60942	16.1323	16.0033	16.1518	16.3155	16.1313	15.9054	16.031	15.5861	0.00296083	0.00134682	129545	7	6	5	3	6	5	8	6
PHF14	PHD finger protein 14	O94880	O94880	-			0.753564	-0.305957	-1.53213	15.4602	15.4469	15.2068	15.3372	14.8411	14.6536	15.2682	14.9357	0.000555199	0.00037494	100053	3	3	1	2	1	3	3	2
DR1	Protein Dr1	Q01658	Q01658	-			0.838755	-0.305556	-1.67498	17.6967	17.0385	17.1875	17.2317	17.6519	16.9271	17.1469	17.0931	0.00117	0.000688	19443.7	4	3	2	2	3	2	2	3
XXYLT1	Xyloside xylosyltransferase 1	Q8NBI6	Q8NBI6	-			0.661837	-0.305227	-1.37641	15.7785	15.5343	15.96	16.1806	15.303	15.6586	15.2732	15.4064	0.000776266	0.000488691	43806.8	4	3	4	7	3	1	1	1
USP25	Ubiquitin carboxyl-terminal hydrolase 25;Isoform USP25b of Ubiquitin carboxyl-terminal hydrolase 25;Isoform USP25m of Ubiquitin carboxyl-terminal hydrolase 25	Q9UHP3;Q9UHP3-1;Q9UHP3-3	Q9UHP3;Q9UHP3-1;Q9UHP3-3	-			0.117375	-0.304821	-0.318225	17.2768	14.827	16.8884	18.1953	16.0828	NaN	16.5378	16.1606	0.00644535	0.00275926	122217.9;122217.9-1;122217.9-3	3	2	3	1	2	NaN	4	3
PSEN1	Presenilin-1;Isoform 2 of Presenilin-1	P49768;P49768-2	P49768;P49768-2	-		+	2.19041	-0.30332	-4.08708	15.9179	15.8448	15.6728	15.8209	15.7045	15.379	15.5083	15.5792	0.00203754	0.00108336	52667.84;52667.84-2	2	2	2	2	2	2	2	1
DDX27	Probable ATP-dependent RNA helicase DDX27	Q96GQ7	Q96GQ7	-		+	2.73671	-0.303228	-5.29787	16.3404	16.1172	16.1224	16.1704	16.1208	15.8543	15.8764	15.8823	0.000144	0.000124	89835.2	11	9	8	12	12	9	9	11
MON2	Protein MON2 homolog;Isoform 2 of Protein MON2 homolog;Isoform 5 of Protein MON2 homolog;Isoform 6 of Protein MON2 homolog	Q7Z3U7;Q7Z3U7-2;Q7Z3U7-5;Q7Z3U7-6	Q7Z3U7;Q7Z3U7-2;Q7Z3U7-5;Q7Z3U7-6	-		+	3.0842	-0.30311	-6.18248	16.203	16.0867	16.0874	16.0888	16.0134	15.7745	15.8653	15.7384	9.19e-05	8.99e-05	190358.97;190358.97-2;190358.97-5;190358.97-6	22	21	19	18	20	20	18	19
MOSPD2	Motile sperm domain-containing protein 2	Q8NHP6	Q8NHP6	-		+	2.40186	-0.303073	-4.53263	16.6849	16.9593	16.9039	16.8532	16.7899	16.4899	16.5248	16.5908	6.34e-05	6.93e-05	59746.2	11	11	9	13	11	9	10	11
NDUFV1	NADH dehydrogenase [ubiquinone] flavoprotein 1, mitochondrial;Isoform 2 of NADH dehydrogenase [ubiquinone] flavoprotein 1, mitochondrial	P49821;P49821-2	P49821;P49821-2	+	CI subunits;Complex I;Fe-S-containing proteins;Metabolism;Metals and cofactors;OXPHOS;OXPHOS subunits	+	2.16999	-0.303003	-4.04544	17.4114	17.5325	17.6113	17.6278	17.3539	17.2554	17.1951	17.1628	9.91e-06	3.34e-05	50817.08;50817.08-2	12	14	14	12	10	12	11	12
TBC1D4	TBC1 domain family member 4;Isoform 2 of TBC1 domain family member 4;Isoform 3 of TBC1 domain family member 4	O60343;O60343-2;O60343-3	O60343;O60343-2;O60343-3	-			0.688098	-0.302663	-1.42126	16.5359	16.3784	15.881	15.7279	16.1598	15.8645	15.9889	15.6483	0.00016	0.000135	146563.4;146563.4-2;146563.4-3	6	7	4	4	7	6	7	5
HSPA12A	Heat shock 70 kDa protein 12A	O43301	O43301	-			0.531807	-0.302278	-1.15003	15.5298	16.071	16.7617	16.096	16.0051	15.7549	15.7711	15.8453	0.000815826	0.000508804	74978.4	6	10	11	8	9	9	9	9
FUBP3	Far upstream element-binding protein 3	Q96I24	Q96I24	-		+	3.47747	-0.302205	-7.3155	17.2971	17.3988	17.3846	17.4137	17.3436	17.0495	17.1436	17.003	4.45e-05	5.55e-05	61640.4	13	13	14	14	14	11	11	13
RCN1	Reticulocalbin-1	Q15293	Q15293	-			0.926905	-0.302087	-1.82177	18.6719	19.0637	19.0162	18.4045	18.9476	18.5316	18.5242	18.5002	5.41e-06	3.26e-05	38890	14	14	15	15	14	14	14	14
FLNB	Isoform 8 of Filamin-B	O75369-8	O75369-8	-		+	1.34013	-0.301968	-2.51336	18.5621	18.1003	18.1104	18.0838	18.2129	17.9238	17.8925	17.9195	2.14e-06	3.26e-05	281635	120	113	115	114	120	109	110	110
KCMF1	E3 ubiquitin-protein ligase KCMF1	Q9P0J7	Q9P0J7	-		+	2.0725	-0.301675	-3.84975	16.606	16.8033	16.5354	16.6724	16.4735	16.3556	16.3256	16.2681	9.61e-05	9.3e-05	41945.4	3	3	3	3	3	3	3	3
UGP2	UTP--glucose-1-phosphate uridylyltransferase	Q16851	Q16851	-			1.29113	-0.301519	-2.43014	18.1269	18.1055	18.5747	18.201	18.0891	17.8489	17.9742	17.9306	5.88e-06	3.26e-05	56940.2	28	23	24	25	25	23	24	24
TEAD1	Transcriptional enhancer factor TEF-1;Isoform 2 of Transcriptional enhancer factor TEF-1	P28347;P28347-2	P28347;P28347-2	-			0.613786	-0.301412	-1.29369	17.1397	17.0871	16.5242	16.3122	17.1198	16.5711	16.5435	16.4909	3.25e-05	4.72e-05	47945.54;47945.54-2	2	3	1	3	2	4	4	4
DCTN6	Dynactin subunit 6	O00399	O00399	-		+	3.44174	-0.30133	-7.20616	15.7967	15.8692	15.7424	15.8348	15.9154	15.4997	15.5635	15.5279	0.00222	0.00115	20747	4	3	3	5	5	3	3	4
TARBP2	RISC-loading complex subunit TARBP2;Isoform 2 of RISC-loading complex subunit TARBP2	Q15633;Q15633-2	Q15633;Q15633-2	-			0.521002	-0.301036	-1.18588	14.5925	14.2581	NaN	14.5661	NaN	13.7461	14.5362	14.2313	0.00981	0.00412	39039.31;39039.31-2	1	1	NaN	1	NaN	1	1	2
SLC20A2	Sodium-dependent phosphate transporter 2	Q08357	Q08357	-			1.07176	-0.300983	-2.06245	16.2289	15.8582	15.6421	15.8813	16.1275	15.5727	15.7679	15.5992	5.79e-05	6.53e-05	70392.4	2	2	2	3	2	2	3	2
UBAP1	Ubiquitin-associated protein 1;Isoform 2 of Ubiquitin-associated protein 1	Q9NZ09;Q9NZ09-2	Q9NZ09;Q9NZ09-2	-			0.155369	-0.300628	-0.415279	16.6524	14.8792	16.922	NaN	16.5377	16.2784	15.616	NaN	0.00562	0.00242	55083.56;55083.56-2	2	2	1	NaN	2	2	2	NaN
PSMG4	Proteasome assembly chaperone 4;Isoform 2 of Proteasome assembly chaperone 4	Q5JS54;Q5JS54-2	Q5JS54;Q5JS54-2	-			1.01905	-0.300489	-1.97482	15.44	15.6434	15.6656	15.6221	15.2287	14.9541	15.4436	15.2607	0.00277	0.00132	13774.68;13774.68-2	2	2	3	2	1	2	3	2
YARS1	Tyrosine--tRNA ligase, cytoplasmic	P54577	P54577	-			0.637393	-0.300468	-1.33445	17.6072	17.6854	18.4874	18.127	17.7097	17.6466	17.5489	17.6731	3.15e-06	3.26e-05	59143.5	33	35	38	37	33	35	33	35
NFAT5	Nuclear factor of activated T-cells 5;Isoform A of Nuclear factor of activated T-cells 5;Isoform E of Nuclear factor of activated T-cells 5	O94916;O94916-2;O94916-5	O94916;O94916-2;O94916-5	-			0.907594	-0.300168	-1.78966	15.1168	15.3895	14.9114	15.4075	14.8006	14.7778	14.7699	14.9273	0.00266	0.00129	165763.42;165763.42-2;165763.42-5	3	5	2	2	3	3	1	3
NOL9	Polynucleotide 5'-hydroxyl-kinase NOL9	Q5SY16	Q5SY16	-		+	3.07763	-0.300157	-6.1648	16.4265	16.376	16.3529	16.5144	16.5184	16.0936	16.1484	16.1704	0.00286	0.00133	79322.8	6	5	4	4	5	5	6	7
YLPM1	YLP motif-containing protein 1;Isoform 1 of YLP motif-containing protein 1	P49750;P49750-1	P49750;P49750-1	-		+	2.22109	-0.299511	-4.15009	15.8973	15.952	15.8558	15.8755	15.8989	15.4145	15.7309	15.6438	0.000357286	0.000261103	241645.31;241645.31-1	10	12	12	11	10	4	6	7
MRPL1	39S ribosomal protein L1, mitochondrial	Q9BYD6	Q9BYD6	+	LSU;Mitochondrial central dogma;Mitochondrial ribosome;Translation	+	2.36604	-0.299508	-4.45526	16.1578	16.0153	16.1119	16.0631	16.0471	15.9172	15.7807	15.6407	0.000965	0.000584	36908.7	8	6	6	6	6	6	5	5
TGFB1I1	Transforming growth factor beta-1-induced transcript 1 protein;Isoform 2 of Transforming growth factor beta-1-induced transcript 1 protein	O43294;O43294-2	O43294;O43294-2	-			0.960686	-0.299255	-1.87789	17.9467	17.884	18.301	17.6062	18.1541	17.6679	17.7176	17.6519	0.00103475	0.000619581	49814.19;49814.19-2	5	7	7	6	6	6	6	7
GNPAT	Dihydroxyacetone phosphate acyltransferase	O15228	O15228	-		+	1.69676	-0.298867	-3.13867	15.8828	15.8694	15.6653	15.8799	15.6888	15.3106	15.6092	15.5754	0.00198	0.00106	77187.9	13	9	11	10	12	9	8	8
CLEC16A	Protein CLEC16A;Isoform 2 of Protein CLEC16A	Q2KHT3;Q2KHT3-2	Q2KHT3;Q2KHT3-2	-			0.548537	-0.298861	-1.17965	15.104	15.0511	15.2074	15.1607	16.0463	14.928	15.1733	14.9439	0.000268855	0.00020526	117714.95;117714.95-2	4	4	5	4	3	3	4	6
EIF2D	Eukaryotic translation initiation factor 2D	P41214	P41214	-		+	1.79816	-0.298777	-3.32445	16.5433	16.5825	16.8677	16.7556	16.5836	16.4264	16.2745	16.4024	0.00107	0.000636	64706.5	8	11	8	8	8	2	7	5
SACS	Sacsin	Q9NZJ4	Q9NZJ4	-			0.942821	-0.298525	-1.84821	15.4082	15.7374	15.7892	15.63	15.1895	15.1496	15.4237	15.1837	0.000787	0.000494	521126	6	14	16	14	10	13	12	14
PON2	Serum paraoxonase/arylesterase 2;Isoform 1 of Serum paraoxonase/arylesterase 2;Isoform 3 of Serum paraoxonase/arylesterase 2	Q15165;Q15165-1;Q15165-3	Q15165;Q15165-1;Q15165-3	-			1.02269	-0.297924	-1.98088	18.1789	18.1876	17.5959	17.9977	18.0497	17.5858	17.78	17.7464	3.69e-05	5e-05	39380.92;39380.92-1;39380.92-3	4	3	3	3	3	3	3	3
IFIT5	Interferon-induced protein with tetratricopeptide repeats 5	Q13325	Q13325	-		+	2.42996	-0.297696	-4.59392	16.7545	16.5734	16.458	16.6314	16.6417	16.2969	16.3253	16.32	0.00141	0.000803	55846.8	8	10	7	7	10	11	10	9
PTRH2	Peptidyl-tRNA hydrolase 2, mitochondrial	Q9Y3E5	Q9Y3E5	+	0	+	2.79862	-0.29683	-5.44829	16.9295	16.8897	16.7915	16.8615	17.0244	16.6042	16.6444	16.5588	0.000326426	0.000241874	19193.5	5	5	6	6	7	5	5	6
NAA50	N-alpha-acetyltransferase 50	Q9GZZ1	Q9GZZ1	-		+	2.01966	-0.296292	-3.74576	17.4772	17.3121	17.1304	17.2566	17.3602	17.0208	16.9577	17.0546	5.21e-05	6.06e-05	19398.3	9	10	10	8	11	10	10	8
MMAA	Methylmalonic aciduria type A protein, mitochondrial	Q8IVH4	Q8IVH4	+	Metabolism;Vitamin B12 metabolism;Vitamin metabolism		0.575786	-0.295382	-1.29314	14.1885	NaN	14.7494	14.2771	14.74	14.115	14.2717	NaN	0.00352	0.00154	46538.3	2	NaN	1	1	1	1	1	NaN
UBE2O	(E3-independent) E2 ubiquitin-conjugating enzyme	Q9C0C9	Q9C0C9	-		+	1.49048	-0.294738	-2.77231	16.4153	16.3152	16.1631	16.0116	16.222	15.7908	15.9554	16.0459	2.59e-05	4.27e-05	141293	14	15	10	10	14	15	11	11
IKBIP	Isoform 4 of Inhibitor of nuclear factor kappa-B kinase-interacting protein	Q70UQ0-4	Q70UQ0-4	-			1.2829	-0.294731	-2.41621	17.5275	17.644	17.5355	18.025	17.7378	17.4095	17.4092	17.379	3.54e-05	4.92e-05	43083.6	16	16	16	16	16	16	15	16
GCC1	GRIP and coiled-coil domain-containing protein 1	Q96CN9	Q96CN9	-			1.27295	-0.294722	-2.39938	15.6466	15.4474	15.8051	15.9332	15.5735	15.2668	15.4771	15.4155	0.00184	0.000997	87810.7	3	1	2	3	2	3	2	3
HSPA4L	Heat shock 70 kDa protein 4L	O95757	O95757	-		+	2.29148	-0.294644	-4.2967	16.9422	17.123	17.1944	17.1791	17.0082	16.8272	16.8165	16.7406	0.00162016	0.000898382	94512.5	6	7	6	6	5	6	5	5
PWP1	Periodic tryptophan protein 1 homolog	Q13610	Q13610	-		+	1.92166	-0.294174	-3.55655	16.6694	16.7076	16.7042	16.4519	16.7679	16.4671	16.3501	16.2809	0.000121	0.000109	55827.9	11	10	8	9	8	9	9	9
MRPS6	28S ribosomal protein S6, mitochondrial	P82932	P82932	+	Mitochondrial central dogma;Mitochondrial ribosome;SSU;Translation		0.926286	-0.29393	-1.82074	15.861	15.7897	16.0563	15.6259	15.6773	15.1776	15.7585	15.5882	5.36e-05	6.18e-05	14226.6	4	4	3	4	3	2	4	4
DHX32	Putative pre-mRNA-splicing factor ATP-dependent RNA helicase DHX32;Isoform 2 of Putative pre-mRNA-splicing factor ATP-dependent RNA helicase DHX32	Q7L7V1;Q7L7V1-2	Q7L7V1;Q7L7V1-2	-			0.655215	-0.293887	-1.39718	13.8718	14.2201	NaN	14.2506	14.1114	13.3953	13.9301	14.1333	0.000437953	0.000309143	84418.57;84418.57-2	1	1	NaN	1	1	1	1	1
SORCS2	VPS10 domain-containing receptor SorCS2	Q96PQ0	Q96PQ0	-			0.136964	-0.29382	-0.365747	15.9946	15.849	14.9626	13.0866	NaN	14.9193	14.365	14.7538	0.00346136	0.00151734	128152	1	1	3	2	NaN	2	2	2
QTRT1	Queuine tRNA-ribosyltransferase catalytic subunit 1	Q9BXR0	Q9BXR0	+	Mitochondrial central dogma;mtRNA metabolism;mt-tRNA modifications		1.19634	-0.293439	-2.37408	16.2981	16.3926	16.6944	NaN	16.372	16.2945	16.1265	16.0165	0.00233415	0.00118557	44047.7	1	2	3	NaN	1	4	3	2
DFFA	DNA fragmentation factor subunit alpha	O00273	O00273	-			1.21802	-0.293413	-2.30683	16.4418	16.0434	15.9843	15.9861	16.1472	15.9369	15.6788	15.8656	8.21e-05	8.34e-05	36521.9	9	8	6	5	7	3	6	3
SIPA1L1	Signal-induced proliferation-associated 1-like protein 1;Isoform 2 of Signal-induced proliferation-associated 1-like protein 1;Isoform 3 of Signal-induced proliferation-associated 1-like protein 1	O43166;O43166-2;O43166-3	O43166;O43166-2;O43166-3	-			0.158635	-0.293369	-0.416953	16.1468	13.7029	15.6242	15.2528	15.2196	NaN	15.2245	14.5673	0.000863048	0.000532297	200028.5;200028.5-2;200028.5-3	16	8	7	9	9	NaN	2	2
TWSG1	Twisted gastrulation protein homolog 1	Q9GZX9	Q9GZX9	-			0.56229	-0.293296	-1.20387	17.6301	17.0073	16.6132	16.7013	17.1083	16.6594	16.8366	16.6602	4.65e-05	5.68e-05	25016.8	2	2	2	2	2	2	2	2
MCCC2	Methylcrotonoyl-CoA carboxylase beta chain, mitochondrial;Isoform 2 of Methylcrotonoyl-CoA carboxylase beta chain, mitochondrial	Q9HCC0;Q9HCC0-2	Q9HCC0;Q9HCC0-2	+	Amino acid metabolism;Branched-chain amino acid metabolism;Metabolism	+	2.22649	-0.292866	-4.16123	15.9798	15.9048	16.1411	15.9962	16.1691	15.803	15.722	15.7109	0.000817	0.00051	61333.2;61333.2-2	8	8	10	9	9	6	8	7
ADSS2	Adenylosuccinate synthetase isozyme 2	P30520	P30520	-		+	1.63361	-0.292578	-3.02496	17.724	18.0279	17.6435	17.912	17.7092	17.5496	17.4968	17.4859	2.18e-05	3.94e-05	50097.4	17	17	17	17	17	16	17	17
ACIN1	Apoptotic chromatin condensation inducer in the nucleus	Q9UKV3	Q9UKV3	-		+	2.57133	-0.291394	-4.91015	16.4014	16.3454	16.2216	16.2247	16.4104	16.0675	16.0503	15.9701	0.000103	9.75e-05	151862	13	14	12	11	12	12	13	11
RAB10	Ras-related protein Rab-10	P61026	P61026	-		+	2.97743	-0.291171	-5.89993	18.4357	18.2798	18.4074	18.2768	18.3168	17.992	18.0916	18.0727	1.9e-05	3.68e-05	22540.9	10	10	10	11	11	11	11	11
TYMS	Thymidylate synthase	P04818	P04818	-			0.283058	-0.290339	-0.681249	17.9855	17.4524	16.3284	17.6685	18.1142	17.2663	17.3065	17.0855	0.000104	9.79e-05	35716	8	6	3	9	7	6	6	6
TRIP13	Pachytene checkpoint protein 2 homolog	Q15645	Q15645	-			0.945906	-0.290046	-1.85334	16.7383	16.2363	16.1463	16.1083	16.3753	15.9321	16.0586	16.1019	2.15e-05	3.92e-05	48550.8	11	10	8	10	12	7	11	10
S100A6	Protein S100-A6	P06703	P06703	-			0.478506	-0.290044	-1.05446	18.9346	19.5185	18.8686	18.9026	18.2974	18.5456	18.4291	18.8681	1.05e-06	3.26e-05	10179.7	4	3	3	3	3	4	3	3
MTMR1	Myotubularin-related protein 1	Q13613	Q13613	-		+	1.77699	-0.289687	-3.28532	15.1621	15.4231	15.1367	15.3454	15.3225	15.1169	14.9528	14.8951	0.000185163	0.000151265	74677.8	5	4	7	6	6	2	4	5
DUSP3	Dual specificity protein phosphatase 3	P51452	P51452	-			0.825101	-0.289539	-1.65217	17.959	17.7999	17.2856	17.6	17.9777	17.5211	17.4191	17.3645	5.81e-05	6.54e-05	20478.3	6	5	6	5	6	7	6	6
DHRS4	Dehydrogenase/reductase SDR family member 4	Q9BTZ2	Q9BTZ2	+	Metabolism;Vitamin A metabolism;Vitamin metabolism		0.101415	-0.289459	-0.276087	15.577	17.0097	16.5831	20.1499	16.4169	16.8671	16.9367	16.7697	5.06e-05	5.98e-05	29537.2	4	5	5	1	5	5	6	5
UBE2L6	Ubiquitin/ISG15-conjugating enzyme E2 L6	O14933	O14933	-			0.971256	-0.289366	-1.89544	16.7166	17.0511	17.2633	16.6515	16.9099	16.5553	16.6139	16.7182	0.00199	0.00106	17768.7	4	3	4	3	4	4	4	4
ARID1A	AT-rich interactive domain-containing protein 1A;Isoform 3 of AT-rich interactive domain-containing protein 1A	O14497;O14497-3	O14497;O14497-3	-			0.940195	-0.289237	-1.84385	15.8464	15.371	15.1321	15.3543	15.4659	15.1783	15.0925	15.1634	0.000323	0.00024	242044.61;242044.61-3	3	3	1	3	4	2	2	2
JUP	Junction plakoglobin	P14923	P14923	-			0.243768	-0.288802	-0.599979	17.0209	15.5332	15.6828	15.3866	16.2212	16.3745	15.1069	15.5591	0.000121	0.000109	81744.7	3	9	9	5	12	10	5	9
TTC5	Tetratricopeptide repeat protein 5	Q8N0Z6	Q8N0Z6	-			1.08609	-0.288668	-2.08629	15.2636	15.5975	15.7553	15.2783	15.6253	15.1236	15.3223	15.2	0.00261	0.00127	48927.5	5	4	3	3	3	4	3	5
PGM1	Phosphoglucomutase-1	P36871	P36871	-			0.951951	-0.288218	-1.86338	17.8894	17.9627	18.5565	18.1528	18.1222	17.8286	17.8731	17.8439	5.15e-06	3.26e-05	61449.1	25	26	26	25	27	24	25	25
MIA3	Transport and Golgi organization protein 1 homolog;Isoform 2 of Transport and Golgi organization protein 1 homolog	Q5JRA6;Q5JRA6-2	Q5JRA6;Q5JRA6-2	-		+	2.00269	-0.287742	-3.71267	16.1667	16.1765	16.359	16.4008	16.1326	15.9162	15.9357	16.0262	0.000155105	0.000131693	213702.33;213702.33-2	19	19	19	17	17	11	14	12
PSMD4	26S proteasome non-ATPase regulatory subunit 4	P55036	P55036	-		+	1.93688	-0.287368	-3.58564	17.3043	17.3397	17.2704	17.211	17.4645	16.9902	17.1811	16.9205	5.03e-05	5.97e-05	40736.7	13	11	14	12	12	11	11	10
METTL7A	Methyltransferase-like protein 7A	Q9H8H3	Q9H8H3	-			0.780032	-0.286697	-1.62099	NaN	16.4411	16.7521	16.7259	16.1244	16.2007	16.1702	16.3015	0.00582387	0.00249961	28319.1	NaN	3	2	2	1	4	3	4
RPL28	60S ribosomal protein L28;Isoform 2 of 60S ribosomal protein L28;Isoform 3 of 60S ribosomal protein L28	P46779;P46779-2;P46779-3	P46779;P46779-2;P46779-3	-			1.04841	-0.286625	-2.02361	18.5073	18.6675	18.5468	18.0959	18.2497	18.1943	18.085	18.1011	1.65e-05	3.55e-05	15747.5;15747.5-2;15747.5-3	8	7	7	7	8	7	7	7
DYM	Dymeclin	Q7RTS9	Q7RTS9	-			1.25608	-0.286538	-2.37089	15.7864	15.9951	15.9537	16.2164	15.8131	15.7601	15.4917	15.7473	0.00291783	0.00133903	75935.4	3	4	4	2	5	3	3	3
THUMPD3	THUMP domain-containing protein 3	Q9BV44	Q9BV44	-		+	1.42884	-0.28639	-2.66543	16.6034	16.2679	16.5376	16.644	16.3012	16.1366	16.1612	16.2555	0.000257582	0.00019801	57002.8	6	4	5	4	3	4	6	5
TELO2	Telomere length regulation protein TEL2 homolog	Q9Y4R8	Q9Y4R8	-		+	1.66572	-0.286328	-3.0826	15.6089	15.5607	15.3617	15.3883	15.4217	15.3281	15.2005	15.0172	0.000237564	0.000184478	91747	8	7	5	5	8	11	10	10
SLC12A9	Solute carrier family 12 member 9	Q9BXP2	Q9BXP2	-		+	2.23089	-0.286194	-4.17034	16.6579	16.8229	16.6123	16.8307	16.6778	16.4528	16.3461	16.5035	0.000110915	0.000102698	96109.7	4	5	5	4	5	4	1	2
CIRBP	Cold-inducible RNA-binding protein	Q14011	Q14011	-			1.21189	-0.286082	-2.29653	16.9304	16.9151	17.2986	17.0979	16.9577	16.7987	16.5485	16.9143	1.97e-05	3.76e-05	18648	3	3	3	2	3	2	2	3
SUMO3	Small ubiquitin-related modifier 3;Isoform 2 of Small ubiquitin-related modifier 3	P55854;P55854-2	P55854;P55854-2	-			0.777682	-0.285695	-1.57271	17.6942	17.4273	17.5085	16.8785	17.3873	17.1096	17.0558	17.115	1.49e-05	3.47e-05	11637.04;11637.04-2	2	2	2	2	2	1	1	1
EXOC6B	Exocyst complex component 6B	Q9Y2D4	Q9Y2D4	-		+	2.86242	-0.285116	-5.60644	16.2258	16.393	16.3844	16.346	16.2847	16.1177	15.9898	16.0175	0.000111538	0.000102958	94200.8	14	13	11	14	17	7	11	11
HINT3	Histidine triad nucleotide-binding protein 3	Q9NQE9	Q9NQE9	+	0		0.549419	-0.284499	-1.1812	16.2424	16.3306	16.6788	16.6272	16.2641	15.5881	16.5098	16.3345	0.00188433	0.0010173	20361.3	1	2	2	1	1	2	2	2
PGRMC1	Membrane-associated progesterone receptor component 1	O00264	O00264	-		+	4.01127	-0.283625	-9.1242	18.2527	18.2755	18.2248	18.1863	18.2349	17.8959	18.0093	17.9485	1.13e-05	3.36e-05	21671.2	10	11	11	11	11	10	11	10
TJP1	Tight junction protein ZO-1	Q07157	Q07157	-			1.16304	-0.283401	-2.21467	16.817	16.3029	16.5328	16.3132	16.3866	16.1901	16.1995	16.1717	1.36e-05	3.43e-05	195459	32	26	28	23	27	15	15	15
TANGO2	Transport and Golgi organization protein 2 homolog;Isoform 3 of Transport and Golgi organization protein 2 homolog;Isoform 4 of Transport and Golgi organization protein 2 homolog	Q6ICL3;Q6ICL3-3;Q6ICL3-4	Q6ICL3;Q6ICL3-3;Q6ICL3-4	-		+	3.34215	-0.283251	-6.90836	16.3013	16.214	16.2878	16.2506	16.3441	15.9865	15.9345	16.068	0.00169538	0.000933456	30937.12;30937.12-3;30937.12-4	4	2	2	4	4	2	3	3
PHLDB2	Pleckstrin homology-like domain family B member 2;Isoform 2 of Pleckstrin homology-like domain family B member 2;Isoform 3 of Pleckstrin homology-like domain family B member 2	Q86SQ0;Q86SQ0-2;Q86SQ0-3	Q86SQ0;Q86SQ0-2;Q86SQ0-3	-			0.857893	-0.282804	-1.70691	15.8775	15.5311	15.697	15.6983	15.5553	15.6074	14.9968	15.5629	0.00266816	0.00128812	142158.2;142158.2-2;142158.2-3	7	5	7	3	8	7	8	8
SKIV2L	Helicase SKI2W	Q15477	Q15477	-		+	1.71411	-0.281437	-3.17017	16.8036	16.7663	16.8529	17.0285	16.6758	16.4489	16.6497	16.5333	8.23e-05	8.34e-05	137755	24	22	19	20	21	19	17	17
UBE2J2	Ubiquitin-conjugating enzyme E2 J2;Isoform 3 of Ubiquitin-conjugating enzyme E2 J2	Q8N2K1;Q8N2K1-3	Q8N2K1;Q8N2K1-3	-			0.0785374	-0.281146	-0.22285	NaN	15.5169	NaN	14.8024	18.8427	16.4311	15.7283	16.1591	0.00394356	0.00171396	28898.29;28898.29-3	NaN	1	NaN	1	1	1	1	2
ABCC1	Multidrug resistance-associated protein 1;Isoform 9 of Multidrug resistance-associated protein 1	P33527;P33527-9	P33527;P33527-9	-			1.13214	-0.280637	-2.16305	16.7617	16.375	16.6721	16.3269	16.2984	16.1509	16.2599	16.2078	8.56e-05	8.59e-05	171591.17;171591.17-9	21	21	18	16	13	13	15	18
ADGRA2	Adhesion G protein-coupled receptor A2;Isoform 2 of Adhesion G protein-coupled receptor A2	Q96PE1;Q96PE1-2	Q96PE1;Q96PE1-2	-			0.541963	-0.280399	-1.19101	15.7869	16.1139	16.5837	15.8153	NaN	15.8936	15.9027	15.5874	0.0031	0.00138	142647.48;142647.48-2	1	3	3	1	NaN	3	3	2
ATP6AP2	Renin receptor;Isoform 2 of Renin receptor	O75787;O75787-2	O75787;O75787-2	-			0.999668	-0.280388	-1.94263	16.694	16.5766	16.2673	16.3602	16.3364	16.2832	16.3133	15.9031	5.26e-05	6.1e-05	39008.01;39008.01-2	6	6	5	5	5	6	7	7
MRPS35	28S ribosomal protein S35, mitochondrial	P82673	P82673	+	Mitochondrial central dogma;Mitochondrial ribosome;SSU;Translation	+	1.7063	-0.280339	-3.15597	15.8559	15.6956	15.6715	15.6494	15.5559	15.3143	15.3306	15.5711	0.00048898	0.000338391	36844.3	7	8	9	9	6	8	8	7
TMEM87B	Transmembrane protein 87B;Isoform 2 of Transmembrane protein 87B	Q96K49;Q96K49-2	Q96K49;Q96K49-2	-		+	2.82661	-0.279522	-5.51726	16.5475	16.6017	16.3993	16.5259	16.4576	16.1958	16.2076	16.2773	0.000172503	0.000142989	63536.2;63536.2-2	3	3	3	3	4	3	4	3
MYH11	Myosin-11;Isoform 2 of Myosin-11;Isoform 3 of Myosin-11;Isoform 4 of Myosin-11	P35749;P35749-2;P35749-3;P35749-4	P35749;P35749-2;P35749-3;P35749-4	-		+	1.96422	-0.27951	-3.63815	21.2048	21.2918	21.5072	21.3422	21.219	20.9823	21.0972	21.0209	0.00456	0.00197	227339.24;227339.24-2;227339.24-3;227339.24-4	3	3	3	3	3	3	3	3
AGFG1	Arf-GAP domain and FG repeat-containing protein 1;Isoform 2 of Arf-GAP domain and FG repeat-containing protein 1;Isoform 3 of Arf-GAP domain and FG repeat-containing protein 1;Isoform 4 of Arf-GAP domain and FG repeat-containing protein 1	P52594;P52594-2;P52594-3;P52594-4	P52594;P52594-2;P52594-3;P52594-4	-		+	2.3086	-0.279424	-4.33282	16.8605	16.641	16.7609	16.6637	16.6368	16.362	16.498	16.4395	0.000174	0.000144	58260.15;58260.15-2;58260.15-3;58260.15-4	8	8	8	6	9	8	8	7
IQGAP1	Ras GTPase-activating-like protein IQGAP1	P46940	P46940	-		+	2.61902	-0.279363	-5.01991	18.7753	18.7137	18.7494	18.9298	18.7041	18.4873	18.5249	18.4731	4.61e-07	3.26e-05	189252	90	88	88	87	87	82	80	85
SFXN1	Sideroflexin-1	Q9H9B4	Q9H9B4	+	Amino acid metabolism;Folate and 1-C metabolism;Metabolism;Serine metabolism;Sideroflexins;Small molecule transport;Vitamin metabolism	+	2.43247	-0.278957	-4.59943	17.6495	17.4208	17.4361	17.6042	17.5057	17.2624	17.2362	17.2344	5.27e-05	6.1e-05	35619.4	8	9	8	8	9	8	9	9
MFSD1	Major facilitator superfamily domain-containing protein 1;Isoform 3 of Major facilitator superfamily domain-containing protein 1;Isoform 5 of Major facilitator superfamily domain-containing protein 1;Isoform 6 of Major facilitator superfamily domain-containing protein 1	Q9H3U5;Q9H3U5-3;Q9H3U5-5;Q9H3U5-6	Q9H3U5;Q9H3U5-3;Q9H3U5-5;Q9H3U5-6	-		+	1.4119	-0.278366	-2.63625	18.0971	17.9914	18.0585	18.3416	17.9183	17.9197	17.7751	17.7142	0.00018315	0.000150165	51208.58;51208.58-3;51208.58-5;51208.58-6	1	1	1	1	1	2	1	2
TMPO	Lamina-associated polypeptide 2, isoforms beta/gamma	P42167	P42167			+	1.96808	-0.277583	-3.64559	17.7864	17.8541	17.7994	17.59	17.867	17.425	17.482	17.5985	4.47e-06	3.26e-05	50670.2	15	15	16	14	17	12	13	11
PRPF31	U4/U6 small nuclear ribonucleoprotein Prp31	Q8WWY3	Q8WWY3	-		+	2.68719	-0.277405	-5.17968	16.6465	16.6694	16.6046	16.659	16.7231	16.4055	16.4819	16.2619	0.000369	0.000268	55456	8	11	11	9	10	11	11	10
CAMK2G	Calcium/calmodulin-dependent protein kinase type II subunit gamma;Isoform 10 of Calcium/calmodulin-dependent protein kinase type II subunit gamma;Isoform 11 of Calcium/calmodulin-dependent protein kinase type II subunit gamma;Isoform 2 of Calcium/calmodulin-dependent protein kinase type II subunit gamma;Isoform 3 of Calcium/calmodulin-dependent protein kinase type II subunit gamma;Isoform 4 of Ca…	Q13555;Q13555-10;Q13555-11;Q13555-2;Q13555-3;Q13555-4;Q13555-5;Q13555-6;Q13555-7;Q13555-8;Q13555-9	Q13555;Q13555-10;Q13555-11;Q13555-2;Q13555-3;Q13555-4;Q13555-5;Q13555-6;Q13555-7;Q13555-8;Q13555-9	-		+	2.92694	-0.277334	-5.76971	16.8251	16.8397	16.7929	16.8501	16.6933	16.4783	16.6038	16.4866	0.00214	0.00112	62607.2;62607.2-10;62607.2-11;62607.2-2;62607.2-3;62607.2-4;62607.2-5;62607.2-6;62607.2-7;62607.2-8;62607.2-9	7	8	6	8	6	7	6	5
PPP4R1	Serine/threonine-protein phosphatase 4 regulatory subunit 1;Isoform 2 of Serine/threonine-protein phosphatase 4 regulatory subunit 1	Q8TF05;Q8TF05-2	Q8TF05;Q8TF05-2	-		+	1.6535	-0.277273	-3.06061	16.476	16.3941	16.1903	16.155	16.272	16.026	15.9208	16.1138	8.55e-05	8.59e-05	107004.01;107004.01-2	16	15	13	13	14	10	14	9
EPN1	Epsin-1;Isoform 2 of Epsin-1;Isoform 3 of Epsin-1	Q9Y6I3;Q9Y6I3-1;Q9Y6I3-3	Q9Y6I3;Q9Y6I3-1;Q9Y6I3-3	-		+	1.57318	-0.276651	-2.91748	16.7572	16.8035	16.738	16.6301	16.4555	16.3732	16.5202	16.3074	7.32e-05	7.65e-05	60293.27;60293.27-1;60293.27-3	8	8	8	7	7	5	5	5
TMEM131	Transmembrane protein 131	Q92545	Q92545	-			0.387077	-0.275607	-0.898429	15.2402	16.3572	15.8879	NaN	15.6944	15.5817	15.7694	15.2069	0.00302	0.00136	205138	3	1	1	NaN	2	3	5	3
PHB	Prohibitin	P35232	P35232	+	Protein import, sorting and homeostasis;Chaperones;Protein homeostasis	+	2.84381	-0.275352	-5.55998	18.7113	18.7376	18.8602	18.6416	18.7563	18.435	18.5031	18.46	4.11e-06	3.26e-05	29804.1	16	14	16	15	15	11	12	13
CHP1	Calcineurin B homologous protein 1	Q99653	Q99653	-		+	2.53085	-0.274946	-4.81822	16.0647	15.896	15.968	16.0314	15.865	15.6614	15.7605	15.6483	0.00014	0.000122	22456.2	8	8	7	8	7	5	7	7
ARL2BP	ADP-ribosylation factor-like protein 2-binding protein;Isoform 2 of ADP-ribosylation factor-like protein 2-binding protein	Q9Y2Y0;Q9Y2Y0-2	Q9Y2Y0;Q9Y2Y0-2	-		+	1.93144	-0.274427	-3.57524	16.6843	16.98	16.8308	16.7423	16.7909	16.4384	16.6187	16.5366	0.00125	0.000725	18822.12;18822.12-2	4	6	4	3	2	3	3	3
ISCU	Iron-sulfur cluster assembly enzyme ISCU, mitochondrial;Isoform 2 of Iron-sulfur cluster assembly enzyme ISCU, mitochondrial	Q9H1K1;Q9H1K1-2	Q9H1K1;Q9H1K1-2	+	Fe-S cluster biosynthesis;Fe-S-containing proteins;Metabolism;Metals and cofactors		0.854392	-0.274272	-1.70107	16.6465	16.3882	16.5914	16.7486	16.8899	16.6849	16.1464	16.3047	0.00186	0.00101	17998.99;17998.99-2	1	1	2	1	1	1	1	2
CDC34	Ubiquitin-conjugating enzyme E2 R1	P49427	P49427	-		+	2.20045	-0.274255	-4.10765	16.6288	16.5283	16.6073	16.4497	16.5312	16.1411	16.3032	16.3801	0.000868392	0.000534888	26736.8	3	3	2	2	4	3	3	3
ECI1	Enoyl-CoA delta isomerase 1, mitochondrial;Isoform 2 of Enoyl-CoA delta isomerase 1, mitochondrial	P42126;P42126-2	P42126;P42126-2	+	Fatty acid oxidation;Lipid metabolism;Metabolism	+	1.75449	-0.273752	-3.24392	17.8475	17.8184	17.8745	17.7503	17.5296	17.5067	17.4472	17.517	6.07e-05	6.75e-05	32815.97;32815.97-2	5	5	5	5	5	5	6	6
YIF1A	Protein YIF1A	O95070	O95070	-		+	1.32913	-0.273188	-2.49463	17.8653	17.7911	18.0713	18.1803	17.87	17.6528	17.8138	17.5806	6.06e-05	6.74e-05	32011.2	2	3	4	3	4	3	3	2
LUZP1	Leucine zipper protein 1	Q86V48	Q86V48	-		+	1.9245	-0.273007	-3.56197	16.5019	16.1847	16.421	16.263	16.3528	16.0487	16.0486	16.1177	1.65e-05	3.55e-05	120275	27	23	23	22	25	18	17	21
SAR1B	GTP-binding protein SAR1b	Q9Y6B6	Q9Y6B6	mito-interacting		+	1.97185	-0.272885	-3.65288	17.7378	17.7091	17.5214	17.5695	17.4538	17.3645	17.3297	17.2821	3.99e-05	5.2e-05	22409.9	5	5	5	5	5	5	5	5
SEPTIN2	Septin-2;Isoform 2 of Septin-2;Isoform 3 of Septin-2	Q15019;Q15019-2;Q15019-3	Q15019;Q15019-2;Q15019-3	-		+	3.59879	-0.272845	-7.69716	18.9026	18.9515	19.0383	19.0138	19.0163	18.6976	18.744	18.6934	7.82e-06	3.32e-05	41487.47;41487.47-2;41487.47-3	18	18	18	18	19	18	17	17
DDX58	Antiviral innate immune response receptor RIG-I;Isoform 2 of Antiviral innate immune response receptor RIG-I	O95786;O95786-2	O95786;O95786-2	mito-interacting			0.960866	-0.272059	-1.94456	16.4653	16.3502	NaN	15.9318	16.2067	16.0415	15.9154	15.9425	0.00312377	0.00139019	106599.66;106599.66-2	3	2	NaN	1	2	3	3	1
BIN3	Bridging integrator 3	Q9NQY0	Q9NQY0	-			0.773249	-0.271722	-1.56526	16.1415	16.1551	15.5523	15.7625	15.8691	15.7342	15.738	15.4009	0.00054	0.000366	29664.9	4	3	2	3	2	2	3	3
USP19	Ubiquitin carboxyl-terminal hydrolase 19;Isoform 3 of Ubiquitin carboxyl-terminal hydrolase 19;Isoform 4 of Ubiquitin carboxyl-terminal hydrolase 19;Isoform 5 of Ubiquitin carboxyl-terminal hydrolase 19;Isoform 6 of Ubiquitin carboxyl-terminal hydrolase 19;Isoform 7 of Ubiquitin carboxyl-terminal hydrolase 19	O94966;O94966-3;O94966-4;O94966-5;O94966-6;O94966-7	O94966;O94966-3;O94966-4;O94966-5;O94966-6;O94966-7	-		+	1.88278	-0.271378	-3.48275	15.9421	15.8081	15.8083	15.6672	15.9878	15.5296	15.5641	15.6202	0.00267318	0.00128957	145650.79;145650.79-3;145650.79-4;145650.79-5;145650.79-6;145650.79-7	4	4	4	3	7	3	4	5
C1QBP	Complement component 1 Q subcomponent-binding protein, mitochondrial	Q07021	Q07021	+	Immune response;Signaling	+	2.46092	-0.271174	-4.66204	18.5575	18.4537	18.45	18.3662	18.4769	18.0965	18.1801	18.2924	7.44e-05	7.73e-05	31362.2	4	4	5	5	4	5	4	5
IPO5	Importin-5;Isoform 3 of Importin-5	O00410;O00410-3	O00410;O00410-3	-		+	2.07457	-0.271013	-3.85384	18.3958	18.1557	18.3529	18.1672	18.36	17.9898	18.0561	18	1.63e-05	3.55e-05	123629.93;123629.93-3	38	35	36	37	36	35	37	34
ARFGAP3	ADP-ribosylation factor GTPase-activating protein 3;Isoform 2 of ADP-ribosylation factor GTPase-activating protein 3	Q9NP61;Q9NP61-2	Q9NP61;Q9NP61-2	-			0.563363	-0.27044	-1.20576	16.8833	16.9245	16.7736	16.0192	16.6557	16.4999	16.3509	16.2917	3.12e-05	4.66e-05	56928.41;56928.41-2	13	14	15	7	14	5	6	6
CIAPIN1	Anamorsin;Isoform 3 of Anamorsin	Q6FI81;Q6FI81-3	Q6FI81;Q6FI81-3	-		+	2.43638	-0.269835	-4.608	16.8134	16.7586	16.732	16.7781	16.9556	16.4672	16.5828	16.5631	3.03e-05	4.59e-05	33582.31;33582.31-3	7	8	6	5	6	6	6	6
NFU1	NFU1 iron-sulfur cluster scaffold homolog, mitochondrial;Isoform 3 of NFU1 iron-sulfur cluster scaffold homolog, mitochondrial	Q9UMS0;Q9UMS0-3	Q9UMS0;Q9UMS0-3	+	Fe-S cluster biosynthesis;Fe-S-containing proteins;Metabolism;Metals and cofactors	+	1.6317	-0.268818	-3.02153	16.2954	16.295	16.1005	16.0457	15.991	15.8535	15.9498	15.8268	0.0027683	0.0013153	28462.54;28462.54-3	4	3	4	2	4	2	4	2
COTL1	Coactosin-like protein	Q14019	Q14019	-			0.933808	-0.268457	-1.83324	19.2957	19.0924	19.0139	18.6374	18.8821	18.7395	18.7128	18.6953	1.89e-05	3.68e-05	15945	13	13	12	11	12	10	10	11
GNPNAT1	Glucosamine 6-phosphate N-acetyltransferase	Q96EK6	Q96EK6	-			1.10728	-0.26837	-2.12159	17.4864	17.4852	17.9065	17.7557	17.8452	17.3905	17.3473	17.5445	2.86e-05	4.45e-05	20749.1	8	6	7	8	8	8	8	7
TLCD3A	TLC domain-containing protein 3A;Isoform 1 of TLC domain-containing protein 3A	Q8TBR7;Q8TBR7-1	Q8TBR7;Q8TBR7-1	-			0.419684	-0.267653	-0.961487	16.5936	15.9255	16.9598	16.8827	NaN	16.3153	16.3178	16.3352	0.0179771	0.00731465	29382.79;29382.79-1	1	2	1	1	NaN	2	2	1
MRPS11	28S ribosomal protein S11, mitochondrial;Isoform 2 of 28S ribosomal protein S11, mitochondrial	P82912;P82912-2	P82912;P82912-2	+	Mitochondrial central dogma;Mitochondrial ribosome;SSU;Translation		1.27077	-0.267252	-2.3957	17.7788	17.6258	17.6472	17.3985	17.7493	17.5386	17.223	17.3565	0.000202163	0.000162118	20615.75;20615.75-2	1	1	2	2	2	1	1	1
YWHAZ	14-3-3 protein zeta/delta	P63104	P63104	-		+	2.49767	-0.267142	-4.74369	19.8371	19.8812	19.7252	19.6483	19.7982	19.501	19.542	19.4896	1.31e-05	3.4e-05	27745.1	14	14	14	12	14	12	11	12
ALDH1B1	Aldehyde dehydrogenase X, mitochondrial	P30837	P30837	+	Detoxification;Metabolism;Xenobiotic metabolism		0.31606	-0.267035	-0.747545	16.6877	17.0168	17.6408	16.0317	17.1441	16.5533	16.7239	16.6344	0.000523596	0.000357414	57206.3	13	13	17	3	15	14	15	14
TBC1D10A	TBC1 domain family member 10A;Isoform 2 of TBC1 domain family member 10A	Q9BXI6;Q9BXI6-2	Q9BXI6;Q9BXI6-2	-		+	1.77169	-0.266804	-3.27555	15.3221	15.5248	15.4729	15.2401	15.2752	15.1664	15.1191	15.0152	0.0023305	0.00118449	57117.58;57117.58-2	2	2	3	2	2	3	2	3
VCAN	Versican core protein;Isoform Vint of Versican core protein	P13611;P13611-5	P13611;P13611-5	-			0.263627	-0.266454	-0.64899	16.5783	NaN	16.4733	16.1512	16.5327	17.1073	15.6357	15.7593	0.00128	0.000737	372820.05;372820.05-5	4	NaN	3	4	3	1	4	1
SUCLG2	Succinate--CoA ligase [GDP-forming] subunit beta, mitochondrial	Q96I99	Q96I99	+	Carbohydrate metabolism;Itaconate metabolism;Metabolism;Nucleotide metabolism;Nucleotide synthesis and processing;TCA cycle	+	2.93876	-0.265889	-5.80001	17.4772	17.4885	17.5739	17.3778	17.4728	17.1744	17.2637	17.1983	2.71e-05	4.34e-05	46510.6	13	13	14	14	13	13	11	12
TOR3A	Torsin-3A;Isoform 2 of Torsin-3A	Q9H497;Q9H497-2	Q9H497;Q9H497-2	-			0.764152	-0.265747	-1.59261	15.7818	15.8724	16.2085	16.0741	15.6641	NaN	15.7047	15.6042	0.00221	0.00115	46199.01;46199.01-2	1	1	1	1	1	NaN	2	1
FST	Follistatin;Isoform 2 of Follistatin	P19883;P19883-2	P19883;P19883-2	-			0.375185	-0.265492	-0.894704	14.5118	15.4923	NaN	NaN	15.2111	14.7432	14.7584	14.917	0.0001	9.56e-05	38007.18;38007.18-2	1	1	NaN	NaN	2	1	2	1
P3H3	Prolyl 3-hydroxylase 3	Q8IVL6	Q8IVL6	-			0.851776	-0.265431	-1.69671	17.788	18.1867	18.3371	18.4183	17.973	17.9232	17.8232	17.8792	8.73e-06	3.33e-05	81836.6	15	16	16	15	15	17	16	16
APEH	Acylamino-acid-releasing enzyme	P13798	P13798	-		+	2.44137	-0.265206	-4.61894	17.9054	17.7358	17.7241	17.6947	17.8395	17.493	17.5743	17.4769	6.79e-06	3.31e-05	81224.6	17	19	17	18	19	18	15	18
NASP	Nuclear autoantigenic sperm protein;Isoform 3 of Nuclear autoantigenic sperm protein	P49321;P49321-3	P49321;P49321-3	-			0.99861	-0.265001	-1.94087	16.5743	16.4888	16.0243	16.291	16.5244	16.1377	16.1498	16.0592	5.46e-06	3.26e-05	85237.71;85237.71-3	17	17	15	17	17	9	12	8
MPHOSPH8	M-phase phosphoprotein 8	Q99549	Q99549	-			1.10604	-0.264618	-2.11952	15.1508	14.8965	15.2441	15.0315	15.2445	15.0001	14.6126	14.934	0.00289	0.00133	97182.2	2	5	4	3	2	2	4	4
MCCC1	Methylcrotonoyl-CoA carboxylase subunit alpha, mitochondrial	Q96RQ3	Q96RQ3	+	Amino acid metabolism;Biotin utilizing proteins;Branched-chain amino acid metabolism;Metabolism;Vitamin metabolism		0.627598	-0.264421	-1.31756	16.0665	15.4575	16.3847	15.9591	16.0411	15.6811	15.7723	15.6987	0.00037732	0.000272886	80473	7	2	7	5	7	4	5	5
PRPSAP2	Phosphoribosyl pyrophosphate synthase-associated protein 2	O60256	O60256	-		+	4.69484	-0.26396	-12.0119	17.187	17.2271	17.1654	17.1425	17.1724	16.8905	16.9444	16.9098	0.000400208	0.00028665	40925.7	8	8	8	7	9	6	7	7
LIN7C	Protein lin-7 homolog C	Q9NUP9	Q9NUP9	-		+	2.76559	-0.263837	-5.36768	16.3571	16.3956	16.3817	16.3914	16.2528	16.164	16.0046	16.1071	0.000264	0.000202	21834	6	7	7	6	5	3	4	4
RNASEL	2-5A-dependent ribonuclease	Q05823	Q05823	-			0.38257	-0.263733	-0.876618	15.1461	15.2294	15.909	16.1818	15.5195	15.0038	15.6873	15.3091	0.00208	0.0011	83532.8	1	1	2	2	1	1	1	2
INF2	Inverted formin-2;Isoform 2 of Inverted formin-2	Q27J81;Q27J81-2	Q27J81;Q27J81-2	-			0.875287	-0.263724	-1.7359	17.4106	17.5079	17.0252	17.0579	17.5622	17.0444	17.0836	17.019	8.06e-06	3.32e-05	135624.32;135624.32-2	35	34	31	33	37	26	27	26
LRCH3	DISP complex protein LRCH3;Isoform 2 of DISP complex protein LRCH3;Isoform 3 of DISP complex protein LRCH3;Isoform 4 of DISP complex protein LRCH3	Q96II8;Q96II8-2;Q96II8-3;Q96II8-4	Q96II8;Q96II8-2;Q96II8-3;Q96II8-4	-		+	1.67595	-0.263677	-3.10104	16.4885	16.6069	16.2929	16.3477	16.3827	16.0736	16.2656	16.141	0.000558	0.000376	86083.35;86083.35-2;86083.35-3;86083.35-4	7	8	7	6	5	3	4	4
AAGAB	Alpha- and gamma-adaptin-binding protein p34	Q6PD74	Q6PD74	-		+	1.90694	-0.263606	-3.52854	17.5327	17.2829	17.2377	17.429	17.3627	17.0898	17.0526	17.1737	0.00121	0.000703	34593.6	4	4	3	4	2	4	4	3
MON1B	Vacuolar fusion protein MON1 homolog B;Isoform 2 of Vacuolar fusion protein MON1 homolog B	Q7L1V2;Q7L1V2-2	Q7L1V2;Q7L1V2-2	-			0.560489	-0.263391	-1.20071	15.426	15.8938	15.8486	15.4466	15.2111	15.3974	15.5546	14.9536	0.000605	0.000401	59217.28;59217.28-2	3	5	4	3	2	2	2	5
MTR	Methionine synthase	Q99707	Q99707	-		+	2.2854	-0.263156	-4.28392	16.4709	16.3478	16.5222	16.3433	16.2794	16.1614	16.0941	16.1331	0.00329156	0.00145024	140527	9	6	6	8	8	9	9	10
PYGL	Glycogen phosphorylase, liver form;Isoform 2 of Glycogen phosphorylase, liver form	P06737;P06737-2	P06737;P06737-2	-			0.257692	-0.263148	-0.629097	16.2161	17.4615	17.2711	18.1749	17.2963	16.9897	17.0143	17.0585	7.03e-05	7.4e-05	97148.6;97148.6-2	20	29	29	31	29	31	28	31
MAP3K20	Mitogen-activated protein kinase kinase kinase 20	Q9NYL2	Q9NYL2	-			0.363958	-0.263005	-0.841048	16.8996	16.4809	15.7212	15.6782	16.3562	15.9691	16.0307	15.8928	9.77e-05	9.4e-05	91155	9	7	3	4	7	7	4	8
UMPS	Uridine 5'-monophosphate synthase	P11172	P11172	-		+	2.77298	-0.262954	-5.38564	16.4514	16.4341	16.6317	16.5201	16.5174	16.2069	16.2608	16.2762	9.8e-06	3.34e-05	52221.6	16	14	15	15	16	14	15	12
TLN1	Talin-1	Q9Y490	Q9Y490	-		+	2.5589	-0.262926	-4.8818	18.7866	18.7858	18.83	18.6088	18.8164	18.5195	18.4897	18.4986	1.49e-06	3.26e-05	269767	115	108	109	103	113	106	102	106
KLC4	Kinesin light chain 4;Isoform 3 of Kinesin light chain 4	Q9NSK0;Q9NSK0-3	Q9NSK0;Q9NSK0-3	-		+	1.71224	-0.262906	-3.16676	16.1443	16.3441	16.3797	16.4684	16.2548	16.1384	16.0683	15.9594	3.03e-05	4.59e-05	68639.54;68639.54-3	8	10	11	11	10	9	11	10
MYO5A	Unconventional myosin-Va;Isoform 2 of Unconventional myosin-Va;Isoform 3 of Unconventional myosin-Va	Q9Y4I1;Q9Y4I1-2;Q9Y4I1-3	Q9Y4I1;Q9Y4I1-2;Q9Y4I1-3	-			1.09813	-0.26288	-2.10634	16.1242	16.204	15.7049	15.8545	15.8953	15.7464	15.7133	15.6213	5.17e-05	6.04e-05	215404.97;215404.97-2;215404.97-3	31	27	24	22	26	20	23	22
ADPRS	ADP-ribose glycohydrolase ARH3	Q9NX46	Q9NX46	-		+	3.30736	-0.262873	-6.8067	16.508	16.522	16.6025	16.5535	16.5007	16.2051	16.2729	16.3454	7.3e-05	7.63e-05	38946.8	6	7	7	7	6	7	7	7
TBL3	Transducin beta-like protein 3	Q12788	Q12788	-			1.06861	-0.262518	-2.0572	16.8535	16.4371	16.2797	16.474	16.5743	16.2881	16.2729	16.2227	7.6e-05	7.85e-05	89034.7	9	10	6	9	10	9	10	11
IDUA	Alpha-L-iduronidase	P35475	P35475	-			0.425464	-0.261153	-0.957186	16.7802	17.1065	17.2592	17.5683	16.3858	16.7662	16.8335	16.6769	0.0028	0.00132	72669.9	4	8	7	10	2	2	6	6
DYNC1I2	Cytoplasmic dynein 1 intermediate chain 2;Isoform 2B of Cytoplasmic dynein 1 intermediate chain 2;Isoform 2C of Cytoplasmic dynein 1 intermediate chain 2;Isoform 2E of Cytoplasmic dynein 1 intermediate chain 2;Isoform 2F of Cytoplasmic dynein 1 intermediate chain 2;Isoform 3 of Cytoplasmic dynein 1 intermediate chain 2	Q13409;Q13409-2;Q13409-3;Q13409-5;Q13409-6;Q13409-7	Q13409;Q13409-2;Q13409-3;Q13409-5;Q13409-6;Q13409-7	-		+	2.07951	-0.260395	-3.86364	17.2051	17.3975	17.1103	17.1643	17.2827	16.9965	16.9657	16.9526	2.55e-05	4.25e-05	71456.58;71456.58-2;71456.58-3;71456.58-5;71456.58-6;71456.58-7	18	19	18	19	21	17	18	17
PAF1	RNA polymerase II-associated factor 1 homolog;Isoform 3 of RNA polymerase II-associated factor 1 homolog	Q8N7H5;Q8N7H5-3	Q8N7H5;Q8N7H5-3	-		+	1.32749	-0.259928	-2.49185	16.3746	16.2529	16.0405	16.1282	16.4511	15.9791	15.9333	16.0563	0.00122	0.00071	59975.72;59975.72-3	5	7	3	6	5	5	4	6
RBM10	RNA-binding protein 10;Isoform 2 of RNA-binding protein 10;Isoform 5 of RNA-binding protein 10	P98175;P98175-2;P98175-5	P98175;P98175-2;P98175-5	-		+	2.60099	-0.259897	-4.97824	15.9031	15.9047	15.8718	15.9962	16.0071	15.5803	15.7554	15.6944	0.000645	0.000423	103532.61;103532.61-2;103532.61-5	8	8	8	4	9	7	6	8
OPHN1	Oligophrenin-1	O60890	O60890	-			0.0737059	-0.259755	-0.210033	16.6542	13.1925	NaN	13.6627	13.443	14.3412	NaN	13.6154	0.00073125	0.000466	91640.7	1	1	NaN	2	1	2	NaN	1
EML2	Echinoderm microtubule-associated protein-like 2;Isoform 2 of Echinoderm microtubule-associated protein-like 2;Isoform 3 of Echinoderm microtubule-associated protein-like 2	O95834;O95834-2;O95834-3	O95834;O95834-2;O95834-3	-			1.00046	-0.259175	-1.94394	16.2697	16.5263	16.7322	16.7405	16.3403	16.2999	16.3121	16.1758	0.00158	0.00088	70678.79;70678.79-2;70678.79-3	5	7	8	10	6	7	8	7
MT-ND4	NADH-ubiquinone oxidoreductase chain 4	P03905	P03905	+	CI subunits;Complex I;OXPHOS;OXPHOS subunits		0.736341	-0.259123	-1.50308	16.1981	16.4024	16.3626	16.6124	16.1209	16.1979	16.3101	15.7325	8.95e-05	8.84e-05	51580.9	5	5	5	5	4	3	5	5
SMARCE1	SWI/SNF-related matrix-associated actin-dependent regulator of chromatin subfamily E member 1;Isoform 2 of SWI/SNF-related matrix-associated actin-dependent regulator of chromatin subfamily E member 1;Isoform 3 of SWI/SNF-related matrix-associated actin-dependent regulator of chromatin subfamily E member 1;Isoform 4 of SWI/SNF-related matrix-associated actin-dependent regulator of chromatin subfa…	Q969G3;Q969G3-2;Q969G3-3;Q969G3-4;Q969G3-5;Q969G3-6	Q969G3;Q969G3-2;Q969G3-3;Q969G3-4;Q969G3-5;Q969G3-6	-			1.16343	-0.259014	-2.21532	16.3286	16.3347	15.9377	16.0413	16.0164	15.8641	15.9624	15.7917	0.00106652	0.000635996	46649.41;46649.41-2;46649.41-3;46649.41-4;46649.41-5;46649.41-6	4	4	4	4	4	4	2	4
COPG1	Coatomer subunit gamma-1	Q9Y678	Q9Y678	-		+	3.69442	-0.259005	-8.00967	18.1334	17.9902	18.0682	18.0788	18.0323	17.8153	17.7989	17.7904	4.77e-06	3.26e-05	97718.2	38	40	39	41	38	39	38	40
[truncated: 3,456 more rows]
